# Supplementary material for: Extent of gross underestimation of precipitation in India
Source: Copernicus journal article supplement (doi:10.5194/hess-28-3435-2024), 2024-07-30
Supplement: Supplementary file 1 [file hess-28-3435-2024-supplement.pdf]

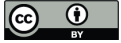

*Supplement of*

## **Extent of gross underestimation of precipitation in India**

**Gopi Goteti and James Famiglietti**

*Correspondence to:* Gopi Goteti (saagu.neeru@gmail.com)

The copyright of individual parts of the supplement might differ from the article licence.

# Supplement

---

The following is an overview of the supplementary material.

- S1: PBCOR dataset
- S2: Data Files (tables and GIS data) & Summary Watershed Characteristics
- S3: Precipitation
  - Average annual precipitation, WY 2007-2014
    - \* Maps of gridded average annual precipitation for each product
    - \* Ratio of IMD and other products by river basin
  - Select Flooding Events
    - \* Assam flooding, June 2012
    - \* Jammu and Kashmir flooding, September 2014
    - \* Kerala flooding, August 2018
  - Time series of basin-averaged precipitation and trends
- S4: ET, GLEAM vs NTSG
- S5: Water Management
- S6: Estimates of Annual  $\Delta TWS$
- S7: Spatial Averaging
- S8: Case Study on Potential Contribution of Inter-watershed Groundwater Flow (IGF)
- S9: Effect of different heuristics on Scenario II
- S10: Time series charts
  - Time series of hydrometeorological data for each of the 73 imbalanced watersheds identified in this study using the IMD-APHRO dataset.
  - Both annual (Jun-May) and seasonal (Jun-Sep) time series charts are presented.
- References

## S1 PBCOR dataset

A bias-correction factor (CF) is defined the ratio of actual  $P$  to observed  $P$ . The PBCOR dataset (Beck et al., 2020) provides average annual and monthly estimates of bias-corrected  $P$  at a resolution of 0.05 deg. Estimates from PBCOR are specific to one of three reference climatology datasets used within its development - CHELSA V1.2, CHPclim V1 and WorldClim V2. The time period corresponding to each of these reference climatologies is as follows: for CHELSA V1.2 it is 1979-2013, for CHPclim V1 it is 1980-2009, and for WorldClim V2 it is 1970-2000. PBCOR was aggregated from its native 0.05 deg resolution to the IMD resolution of 0.25 deg by appropriately accounting for spatial overlap between the 0.05 deg and 0.25 deg grid meshes. Next, the long-term average monthly  $P$  was estimated for the IMD grids, for each of the above time periods corresponding to each climatology. The ratio of aggregated PBCOR data at 0.25 deg and IMD data, as shown in Eq S1.1 - S1.3, is the estimated CF and is shown in Figure S1.1.

$$CF^{CHELSA} = \frac{\overline{P}^{CHELSA}}{\overline{P}_{1979-2013}^{IMD}} \quad (S1.1)$$

$$CF^{CHPclim} = \frac{\overline{P}^{CHPclim}}{\overline{P}_{1980-2009}^{IMD}} \quad (S1.2)$$

$$CF^{WorldClim} = \frac{\overline{P}^{WorldClim}}{\overline{P}_{1970-2000}^{IMD}} \quad (S1.3)$$

If PBCOR's estimates were to be considered reasonable, then the ratio of PBCOR to IMD's observed data represents the CF associated with IMD data. Figure S1.2 shows the annual average precipitation from IMD and the CFs derived using CHPclim (Eq. S1.2).

(a) Ratio of PBCOR (CHELSA V1.2) and IMD

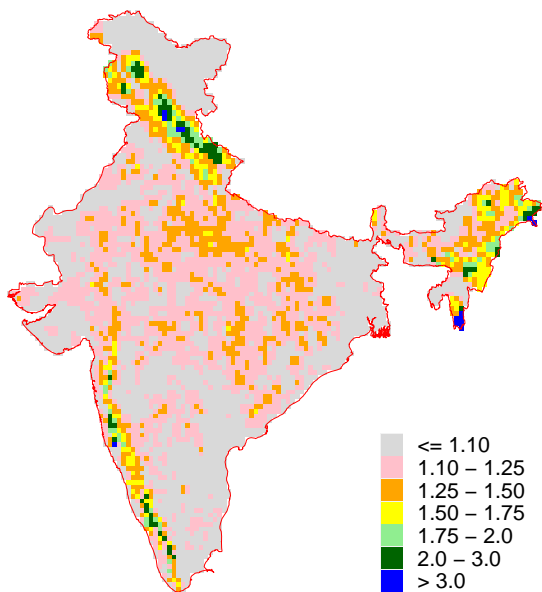

(b) Ratio of PBCOR (CHPclim V1) and IMD

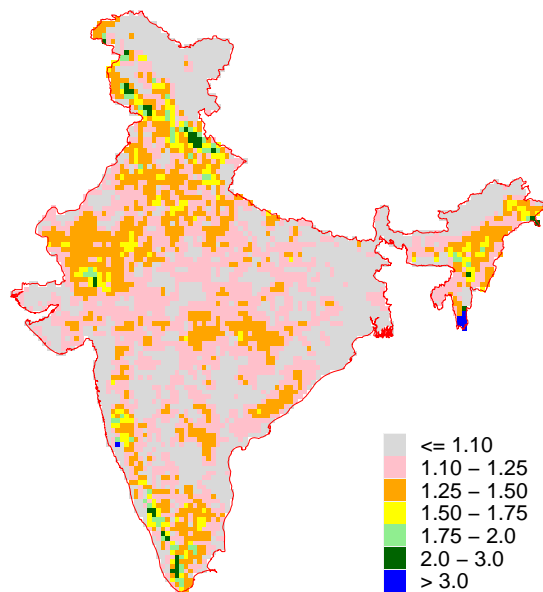

(c) Ratio of PBCOR (WorldClim V2) and IMD

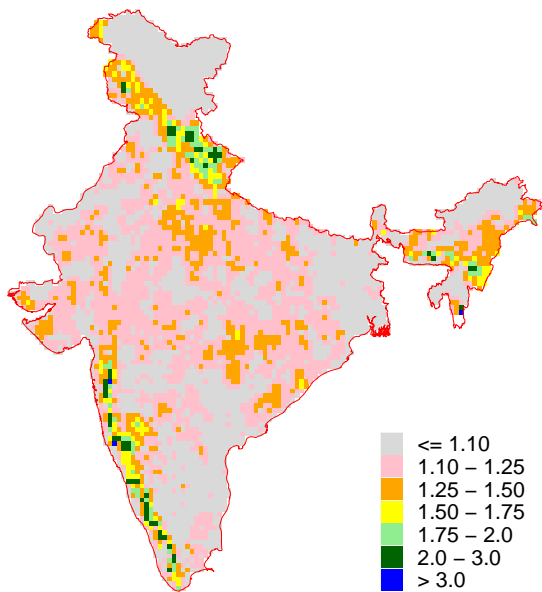

Figure S1.1: Ratio of bias-corrected annual  $P$  from PBCOR and annual  $P$  from IMD.



(a) IMD Average Annual Precip. (mm), 1980–2009

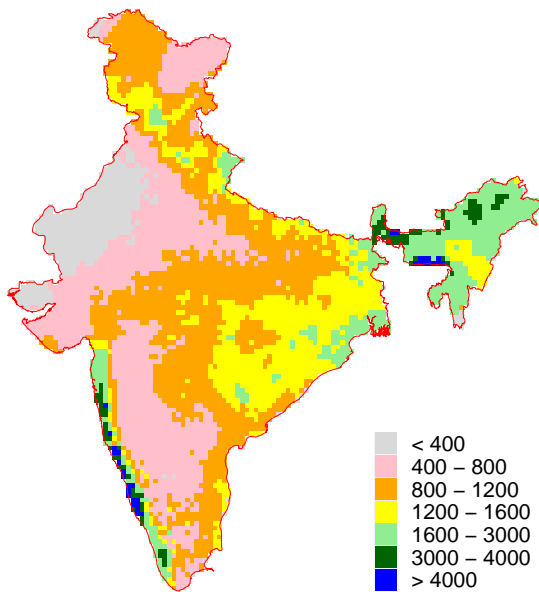

(b) Ratio of PBCOR and IMD

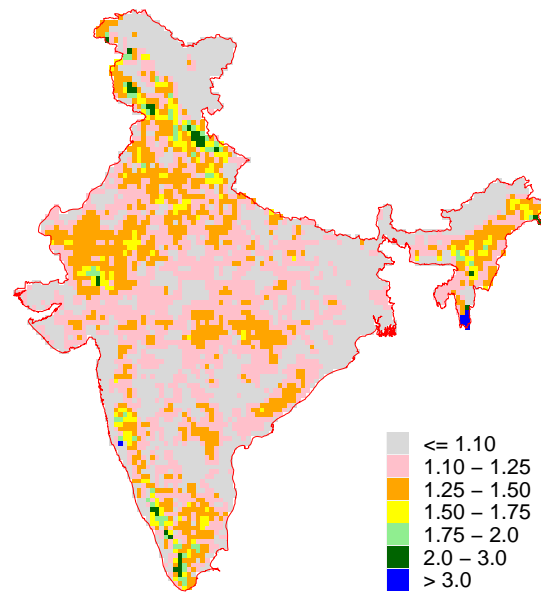

Figure S1.2: (a) Average annual  $P$  (mm) from IMD for 1980-2009. (b) Ratio of bias-corrected annual precipitation from PBCOR and annual precipitation from IMD.

## S2 Data Files & Summary Watershed Characteristics

The following **tabular data** are included within the supplementary material.

- List of 242 streamflow gauging stations used in this study (CSV file, 'stations\_all.txt'); attributes include:
  - ghi\_stn\_id : Unique station ID, 10 characters long, similar to GHI
  - disp\_basin : Complete name of the River Basin
  - st : State associated with the station, CWC
  - site\_name : Name of the station, CWC
  - riv\_name : River/tributary, CWC
  - drai\_area : Catchment area (sq km), CWC
  - shpArea\_wgs : Catchment area (sq km), estimated in this study, similar to GHI
  - stn\_lat : Latitude of the station (decimal degrees), CWC
  - stn\_lon : Longitude of the station (decimal degrees), CWC
  - hydro\_lat : Latitude of the relocated station (decimal degrees), similar to GHI
  - hydro\_lon : Longitude of the relocated station (decimal degrees), similar to GHI
- List of 73 imbalanced watersheds identified in this study using the IMD-APHRO dataset (CSV file, 'stations\_73.txt'); attributes same as 'stations\_all.txt'
- Annual (WY-based) watershed-averaged hydrometeorological time series (CSV file, 'hydromet\_annual.txt'); for WY 1980-2019, whenever data is available, for all 242 stations; attributes include:
  - ghi\_stn\_id : Unique station ID, 10 characters long, similar to GHI
  - wyr: water year
  - dname:  $P$  dataset name (referred to by the 'Alias' in Table 1 of the paper)
  - prec\_mcm :  $P$  corresponding to each dataset, in mcm
  - evap\_gleam\_mcm,  $ET$  from GLEAM, in mcm
  - flow\_mcm\_obs, observed  $R$ , in mcm
  - cgros: annual cumulative maximum gross storage capacity, in mcm
  - clive: annual cumulative maximum live storage capacity, in mcm

The following **GIS data** are included within the supplementary material.

- GIS data on catchment boundaries of the 242 gauging stations (zip file, 'gis\_watersheds.zip')
- GIS data on catchment boundaries of major river basins (zip file, 'basin\_bounds.zip')

Table S2.1: Summary information on streamflow stations used in this study. Frequency of streamflow observations and the source of the data is also mentioned.

| Region           | Basin              | Stations | Frequency | Source |
|------------------|--------------------|----------|-----------|--------|
| Northern India   | Barak              | 8        | Annual    | CWC-19 |
| Northern India   | Brahmaputra        | 2        | Annual    | CWC-19 |
| Northern India   | Ganga              | 18       | Annual    | CWC-19 |
| Northern India   | Indus              | 1        | Annual    | CWC-19 |
| Peninsular India | Brahmani-Baitarani | 7        | Daily     | GHI    |
| Peninsular India | Cauvery            | 20       | Daily     | GHI    |
| Peninsular India | EFR North          | 5        | Daily     | GHI    |
| Peninsular India | EFR South          | 12       | Daily     | GHI    |
| Peninsular India | Godavari           | 40       | Daily     | GHI    |
| Peninsular India | Krishna            | 42       | Daily     | GHI    |
| Peninsular India | Mahanadi           | 19       | Daily     | GHI    |
| Peninsular India | Mahi               | 6        | Daily     | GHI    |
| Peninsular India | Narmada            | 18       | Daily     | GHI    |
| Peninsular India | Pennar             | 6        | Daily     | GHI    |
| Peninsular India | Sabarmati          | 2        | Daily     | GHI    |
| Peninsular India | Subernarekha       | 4        | Daily     | GHI    |
| Peninsular India | Tapi               | 4        | Daily     | GHI    |
| Peninsular India | WFR North          | 4        | Daily     | GHI    |
| Peninsular India | WFR South          | 24       | Daily     | GHI    |

Table S2.2: Select characteristics of the 242 catchments analyzed in this study. ‘Area’ is catchment drainage area in sq. km; ‘Elev’ is elevation in meters and presented as median (maximum); percentage of catchment covered by cropland and forests (grassland, shrub, tree/forest); annual average precipitation and ET (WY 1985-2014) in mm/year.

| Study ID   | Site               | Basin       | Region  | Area   | Elev       | %Crop | %Forest | P (mm) | ET (mm) |
|------------|--------------------|-------------|---------|--------|------------|-------|---------|--------|---------|
| gbmx_annap | Anna Purna Ghat    | Barak       | N.India | 19235  | 727(2912)  | 3     | 96      | 1780   | 1081    |
| gbmx_badar | Badar Pur Ghat     | Barak       | N.India | 25629  | 589(2912)  | 4     | 94      | 1898   | 1076    |
| gbmx_baghm | Baghmara           | Barak       | N.India | 2310   | 408(1333)  | 2     | 98      | 4949   | 1050    |
| gbmx_fuler | Fulertal           | Barak       | N.India | 15249  | 847(2912)  | 1     | 98      | 1695   | 1086    |
| gbmx_kaila | Kailashahar        | Barak       | N.India | 2188   | 105(883)   | 5     | 92      | 2093   | 1014    |
| gbmx_matij | Matijuri           | Barak       | N.India | 4630   | 351(1545)  | 3     | 96      | 2547   | 1105    |
| gbmx_ranik | Ranikor            | Barak       | N.India | 2510   | 1042(1876) | 10    | 89      | 5795   | 1070    |
| gbmx_tular | Tulargram          | Barak       | N.India | 3182   | 351(1814)  | 4     | 94      | 2610   | 1081    |
| gbmx_domoh | Domohani           | Brahmaputra | N.India | 9648   | 2526(8038) | 4     | 75      | 2772   | 631     |
| gbmx_panch | Pancharatna        | Brahmaputra | N.India | 458992 | 4306(7057) | 4     | 69      | 925    | 490     |
| gbmx_banda | Banda              | Ganga       | N.India | 25447  | 376(715)   | 57    | 40      | 1065   | 476     |
| gbmx_chhat | Chhatnag Allahabad | Ganga       | N.India | 440125 | 312(6872)  | 63    | 30      | 853    | 492     |
| gbmx_chopa | Chopan             | Ganga       | N.India | 47098  | 463(1207)  | 39    | 56      | 1135   | 571     |
| gbmx_cs97a | C.S-97 A,Farakka   | Ganga       | N.India | 927899 | 305(8454)  | 53    | 37      | 917    | 529     |
| gbmx_dabri | Dabri              | Ganga       | N.India | 24606  | 219(3043)  | 56    | 40      | 1066   | 689     |
| gbmx_galet | Galeta             | Ganga       | N.India | 4614   | 251(823)   | 63    | 30      | 949    | 614     |
| gbmx_hathi | Hathidah           | Ganga       | N.India | 780608 | 313(7584)  | 56    | 36      | 877    | 527     |
| gbmx_jamal | Jamalpur           | Ganga       | N.India | 21907  | 324(1285)  | 46    | 46      | 1295   | 614     |
| gbmx_koelw | Koelwar            | Ganga       | N.India | 68304  | 439(1207)  | 39    | 57      | 1112   | 578     |
| gbmx_maigh | Maighat            | Ganga       | N.India | 30055  | 120(210)   | 81    | 15      | 866    | 523     |
| gbmx_mohan | Mohanpur           | Ganga       | N.India | 5790   | 193(608)   | 51    | 44      | 1510   | 656     |
| gbmx_palix | Pali               | Ganga       | N.India | 76812  | 436(813)   | 68    | 26      | 885    | 458     |
| gbmx_rishi | Rishikesh          | Ganga       | N.India | 21897  | 2830(6872) | 6     | 63      | 1303   | 531     |
| gbmx_seond | Seondha            | Ganga       | N.India | 16507  | 333(539)   | 68    | 28      | 810    | 454     |
| gbmx_shahj | Shahjina           | Ganga       | N.India | 44144  | 391(666)   | 70    | 26      | 981    | 473     |
| gbmx_turti | Turtipar           | Ganga       | N.India | 123606 | 981(7425)  | 34    | 52      | 1096   | 617     |
| gbmx_udixx | Udi                | Ganga       | N.India | 135935 | 414(1222)  | 64    | 31      | 779    | 433     |
| gbmx_varan | Varanasi           | Ganga       | N.India | 461772 | 309(6872)  | 63    | 30      | 858    | 492     |
| indu_akhno | Akhnoor            | Indus       | N.India | 22691  | 3822(6381) | 4     | 52      | 1241   | 358     |
| brba_altum | Altuma             | Brah.-Bait. | P.India | 937    | 147(941)   | 20    | 78      | 1577   | 751     |

Continued on next page

Table S2.2 – continued from previous page

| GHI ID     | Site                  | Basin       | Region  | Area   | Elev       | %Crop | %Forest | P (mm) | ET (mm) |
|------------|-----------------------|-------------|---------|--------|------------|-------|---------|--------|---------|
| brba_anand | Anandpur              | Brah.-Bait. | P.India | 8655   | 425(1143)  | 32    | 66      | 1538   | 727     |
| brba_champ | Champua               | Brah.-Bait. | P.India | 1829   | 573(1093)  | 21    | 77      | 1417   | 705     |
| brba_gomla | Gomla                 | Brah.-Bait. | P.India | 21758  | 505(1101)  | 34    | 62      | 1351   | 654     |
| brba_jarai | Jaraikeela            | Brah.-Bait. | P.India | 10541  | 565(1072)  | 37    | 60      | 1314   | 650     |
| brba_jenap | Jenapur               | Brah.-Bait. | P.India | 36131  | 358(1137)  | 33    | 64      | 1426   | 687     |
| brba_tilga | Tilga                 | Brah.-Bait. | P.India | 3223   | 745(1101)  | 33    | 64      | 1302   | 634     |
| cauv_akkih | Akkihebbal            | Cauvery     | P.India | 5154   | 938(1735)  | 25    | 68      | 1001   | 762     |
| cauv_bilig | Biligundulu           | Cauvery     | P.India | 37505  | 818(1920)  | 29    | 64      | 931    | 731     |
| cauv_chunc | Chunchunkatte         | Cauvery     | P.India | 2816   | 903(1587)  | 15    | 81      | 1375   | 912     |
| cauv_elunu | Elunuthimangalam      | Cauvery     | P.India | 3501   | 351(1796)  | 43    | 38      | 751    | 636     |
| cauv_hogen | Hogenakkal            | Cauvery     | P.India | 1593   | 787(1316)  | 28    | 68      | 868    | 699     |
| cauv_kmvd  | K.M.Vadi              | Cauvery     | P.India | 1464   | 855(1461)  | 16    | 81      | 1039   | 863     |
| cauv_kodum | Kodumudi              | Cauvery     | P.India | 52774  | 794(2577)  | 29    | 65      | 936    | 734     |
| cauv_kudig | Kudige                | Cauvery     | P.India | 1743   | 929(1587)  | 3     | 94      | 1710   | 1032    |
| cauv_musir | Musiri                | Cauvery     | P.India | 69632  | 732(2577)  | 33    | 60      | 911    | 717     |
| cauv_mutha | Muthankera            | Cauvery     | P.India | 1235   | 773(1920)  | 2     | 95      | 1780   | 1161    |
| cauv_nall1 | Nallamaranpatty       | Cauvery     | P.India | 8725   | 314(2499)  | 46    | 49      | 898    | 658     |
| cauv_nelli | Nellithurai           | Cauvery     | P.India | 1499   | 912(2555)  | 6     | 92      | 1121   | 973     |
| cauv_sakle | Sakleshpur            | Cauvery     | P.India | 616    | 957(1345)  | 5     | 92      | 1793   | 995     |
| cauv_savan | Savandapur            | Cauvery     | P.India | 5656   | 744(2577)  | 18    | 77      | 1112   | 786     |
| cauv_then1 | Thengumarahada        | Cauvery     | P.India | 1360   | 1004(2556) | 6     | 91      | 1250   | 810     |
| cauv_thevu | Thevur                | Cauvery     | P.India | 1208   | 299(1605)  | 45    | 48      | 1077   | 775     |
| cauv_thimm | Thimmanahalli         | Cauvery     | P.India | 975    | 1010(1735) | 20    | 74      | 864    | 822     |
| cauv_thopp | Thoppur               | Cauvery     | P.India | 356    | 490(1576)  | 28    | 70      | 877    | 749     |
| cauv_tkhal | T.K.Halli             | Cauvery     | P.India | 8158   | 798(1212)  | 42    | 50      | 812    | 628     |
| cauv_urach | Urachikottai          | Cauvery     | P.India | 44896  | 803(1920)  | 29    | 65      | 925    | 732     |
| efrn_anaka | Anakapalle            | EFR North   | P.India | 2118   | 146(1577)  | 22    | 76      | 1153   | 796     |
| efrn_gudar | Gudari                | EFR North   | P.India | 3147   | 432(1432)  | 12    | 88      | 1384   | 802     |
| efrn_kutra | Kutragada             | EFR North   | P.India | 1080   | 428(1432)  | 24    | 75      | 1382   | 763     |
| efrn_purus | Purushottampur        | EFR North   | P.India | 7055   | 154(1274)  | 26    | 72      | 1341   | 763     |
| efrn_srika | Srikakulam            | EFR North   | P.India | 9119   | 334(1530)  | 27    | 71      | 1257   | 780     |
| efrs_ambas | Ambasamudram          | EFR South   | P.India | 716    | 565(1860)  | 18    | 79      | 1178   | 817     |
| efrs_avara | Avarankuppam          | EFR South   | P.India | 3207   | 823(1214)  | 44    | 47      | 782    | 602     |
| efrs_cheng | Chengalpet            | EFR South   | P.India | 16403  | 430(1269)  | 41    | 52      | 950    | 688     |
| efrs_gumma | Gummanur              | EFR South   | P.India | 5138   | 882(1365)  | 37    | 45      | 780    | 640     |
| efrs_irruk | Irukankudi            | EFR South   | P.India | 3902   | 133(1902)  | 53    | 40      | 944    | 730     |
| efrs_kudal | Kudalaiyathur         | EFR South   | P.India | 7216   | 151(1352)  | 52    | 44      | 944    | 757     |
| efrs_murap | Murappanadu           | EFR South   | P.India | 4735   | 119(1745)  | 46    | 46      | 836    | 771     |
| efrs_naidu | Naidupet              | EFR South   | P.India | 2427   | 192(1103)  | 31    | 63      | 1129   | 671     |
| efrs_param | Paramakudi            | EFR South   | P.India | 5820   | 333(2602)  | 34    | 60      | 1005   | 796     |
| efrs_theni | Theni                 | EFR South   | P.India | 1364   | 461(2602)  | 24    | 71      | 999    | 921     |
| efrs_vazha | Vazhavachanur         | EFR South   | P.India | 11656  | 636(1584)  | 41    | 49      | 813    | 697     |
| efrs_villu | Villupuram            | EFR South   | P.India | 13455  | 525(1584)  | 43    | 47      | 840    | 702     |
| goda_ambab | Ambabal               | Godavari    | P.India | 1932   | 624(750)   | 37    | 61      | 1373   | 626     |
| goda_ashti | Ashti                 | Godavari    | P.India | 51469  | 337(1168)  | 46    | 51      | 1255   | 573     |
| goda_bamni | Bamni                 | Godavari    | P.India | 46334  | 343(913)   | 63    | 33      | 995    | 550     |
| goda_betmo | Betmogrra             | Godavari    | P.India | 2117   | 498(663)   | 65    | 31      | 871    | 545     |
| goda_bhatp | Bhatpalli             | Godavari    | P.India | 3182   | 381(629)   | 39    | 59      | 1191   | 564     |
| goda_cherr | Cherribeda            | Godavari    | P.India | 1026   | 637(837)   | 34    | 64      | 1326   | 607     |
| goda_chind | Chindnar              | Godavari    | P.India | 17996  | 616(1342)  | 33    | 64      | 1441   | 656     |
| goda_deglo | Degloor               | Godavari    | P.India | 1923   | 502(684)   | 64    | 33      | 851    | 559     |
| goda_dhale | Dhalegaon             | Godavari    | P.India | 30771  | 552(1453)  | 63    | 31      | 723    | 521     |
| goda_ghugu | Ghugus                | Godavari    | P.India | 19925  | 309(913)   | 64    | 32      | 987    | 550     |
| goda_grbri | G.R.Bridge            | Godavari    | P.India | 33497  | 546(1453)  | 64    | 31      | 734    | 521     |
| goda_hivra | Hivra                 | Godavari    | P.India | 10293  | 365(913)   | 63    | 33      | 907    | 540     |
| goda_jagda | Jagdapur              | Godavari    | P.India | 7340   | 621(1342)  | 35    | 61      | 1503   | 671     |
| goda_kanha | Kanhargaon            | Godavari    | P.India | 3519   | 550(728)   | 76    | 21      | 884    | 529     |
| goda_keola | Keolari               | Godavari    | P.India | 3059   | 604(954)   | 58    | 38      | 1140   | 530     |
| goda_koida | Koida                 | Godavari    | P.India | 304629 | 424(1605)  | 50    | 47      | 1119   | 592     |
| goda_konta | Konta                 | Godavari    | P.India | 20334  | 555(1605)  | 20    | 78      | 1460   | 727     |
| goda_kumha | Kumhari               | Godavari    | P.India | 8432   | 532(954)   | 47    | 50      | 1206   | 550     |
| goda_manch | Mancherial            | Godavari    | P.India | 101456 | 521(1453)  | 65    | 30      | 846    | 543     |
| goda_mangr | Mangrul               | Godavari    | P.India | 2187   | 390(567)   | 68    | 28      | 886    | 548     |
| goda_nandg | Nandgaon              | Godavari    | P.India | 4586   | 287(574)   | 60    | 36      | 1062   | 569     |
| goda_nowra | Nowrangpur            | Godavari    | P.India | 3661   | 820(1342)  | 20    | 75      | 1488   | 720     |
| goda_patha | Pathagudem            | Godavari    | P.India | 38980  | 555(1342)  | 24    | 75      | 1462   | 687     |
| goda_pauni | Pauni                 | Godavari    | P.India | 35992  | 439(1168)  | 48    | 48      | 1191   | 561     |
| goda_perur | Perur                 | Godavari    | P.India | 267340 | 435(1453)  | 53    | 43      | 1077   | 575     |
| goda_polav | Polavaram             | Godavari    | P.India | 306684 | 424(1605)  | 49    | 47      | 1120   | 594     |
| goda_potte | Potteru (Seasonal)    | Godavari    | P.India | 1175   | 203(962)   | 31    | 67      | 1487   | 729     |
| goda_rajeg | Rajegaon              | Godavari    | P.India | 5403   | 367(805)   | 37    | 60      | 1333   | 618     |
| goda_rajol | Rajoli                | Godavari    | P.India | 1899   | 239(453)   | 50    | 47      | 1263   | 565     |
| goda_ramak | Ramakona              | Godavari    | P.India | 2520   | 720(1135)  | 40    | 57      | 1095   | 531     |
| goda_sakmu | Sakmur                | Godavari    | P.India | 47708  | 339(913)   | 63    | 34      | 1005   | 550     |
| goda_saleb | Salebardi             | Godavari    | P.India | 1780   | 277(698)   | 42    | 55      | 1354   | 632     |
| goda_sarad | Saradaput             | Godavari    | P.India | 5098   | 610(1548)  | 24    | 73      | 1530   | 693     |
| goda_satra | Satrapur              | Godavari    | P.India | 11201  | 599(1168)  | 47    | 50      | 1077   | 548     |
| goda_soman | Somanpally (Seasonal) | Godavari    | P.India | 12928  | 328(641)   | 66    | 28      | 952    | 570     |
| goda_sonar | Sonarpal              | Godavari    | P.India | 1481   | 600(843)   | 36    | 62      | 1512   | 633     |
| goda_tekra | Tekra                 | Godavari    | P.India | 107798 | 330(1168)  | 53    | 44      | 1151   | 563     |
| goda_tumna | Tumnar                | Godavari    | P.India | 1874   | 525(1218)  | 23    | 75      | 1489   | 640     |
| goda_waira | Wairagarh             | Godavari    | P.India | 1765   | 277(607)   | 25    | 73      | 1430   | 651     |
| goda_yelli | Yelli                 | Godavari    | P.India | 53688  | 529(1453)  | 66    | 29      | 764    | 520     |
| kris_arjun | Arjunwad (Seasonal)   | Krishna     | P.India | 12280  | 690(1422)  | 43    | 50      | 933    | 585     |
| kris_bawap | Bawapuram             | Krishna     | P.India | 66893  | 596(1830)  | 47    | 46      | 774    | 598     |
| kris_byala | Byaladahalli          | Krishna     | P.India | 2508   | 650(1016)  | 47    | 48      | 788    | 570     |
| kris_chola | Cholachugudda         | Krishna     | P.India | 9939   | 632(1000)  | 54    | 40      | 694    | 607     |
| kris_damer | Dameracherla          | Krishna     | P.India | 11312  | 458(720)   | 63    | 27      | 802    | 567     |
| kris_daund | Daund                 | Krishna     | P.India | 11439  | 640(1434)  | 42    | 47      | 1117   | 542     |

Continued on next page

Table S2.2 – continued from previous page

| GHI ID     | Site                    | Basin        | Region  | Area   | Elev      | %Crop | %Forest | P (mm) | ET (mm) |
|------------|-------------------------|--------------|---------|--------|-----------|-------|---------|--------|---------|
| kris_deosu | Deosugur                | Krishna      | P.India | 126250 | 575(1434) | 58    | 36      | 758    | 554     |
| kris_halia | Halia                   | Krishna      | P.India | 3284   | 293(689)  | 63    | 34      | 777    | 553     |
| kris_haral | Haralahalli             | Krishna      | P.India | 14654  | 653(1814) | 28    | 67      | 1292   | 775     |
| kris_holeh | Holehonnur              | Krishna      | P.India | 3443   | 786(1814) | 8     | 88      | 1578   | 950     |
| kris_huvin | Huvinhedigi             | Krishna      | P.India | 54166  | 611(1422) | 52    | 41      | 770    | 602     |
| kris_jeewa | Jeewangi                | Krishna      | P.India | 1943   | 545(720)  | 63    | 33      | 828    | 571     |
| kris_kagra | K. Agraharam            | Krishna      | P.India | 129542 | 572(1434) | 58    | 36      | 755    | 554     |
| kris_karad | Karad                   | Krishna      | P.India | 5432   | 737(1422) | 33    | 59      | 1138   | 618     |
| kris_keesa | Keesara                 | Krishna      | P.India | 10545  | 177(732)  | 60    | 36      | 1048   | 634     |
| kris_kello | Kellodu                 | Krishna      | P.India | 4297   | 798(1830) | 41    | 53      | 643    | 593     |
| kris_kokan | Kokangaon               | Krishna      | P.India | 1483   | 572(752)  | 62    | 31      | 507    | 517     |
| kris_kuppe | Kuppellur               | Krishna      | P.India | 2062   | 640(974)  | 35    | 61      | 1037   | 711     |
| kris_kurun | Kurundwad               | Krishna      | P.India | 15265  | 670(1422) | 42    | 50      | 1007   | 599     |
| kris_madhi | Madhira                 | Krishna      | P.India | 1685   | 111(640)  | 59    | 38      | 1072   | 654     |
| kris_malkh | Malkhed                 | Krishna      | P.India | 8380   | 540(720)  | 66    | 31      | 772    | 565     |
| kris_mantr | Mantralayam             | Krishna      | P.India | 64701  | 601(1830) | 46    | 47      | 777    | 601     |
| kris_marol | Marol                   | Krishna      | P.India | 5183   | 587(791)  | 40    | 55      | 1085   | 711     |
| kris_mudho | Mudhol                  | Krishna      | P.India | 6773   | 679(1040) | 47    | 47      | 878    | 679     |
| kris_narsi | Narsingpur              | Krishna      | P.India | 22326  | 609(1434) | 48    | 43      | 933    | 531     |
| kris_navai | Navalagund              | Krishna      | P.India | 3079   | 634(836)  | 57    | 37      | 623    | 593     |
| kris_oolle | Oollenur                | Krishna      | P.India | 32961  | 607(1814) | 40    | 54      | 973    | 685     |
| kris_paler | Paleru Bridge           | Krishna      | P.India | 2489   | 189(414)  | 73    | 23      | 950    | 611     |
| kris_phulg | Phulgaon (Seasonal)     | Krishna      | P.India | 2142   | 659(1198) | 34    | 54      | 1517   | 577     |
| kris_sadal | Sadalga (Seasonal)      | Krishna      | P.India | 2285   | 605(1020) | 38    | 56      | 958    | 692     |
| kris_samdo | Samdoli (Seasonal)      | Krishna      | P.India | 2010   | 618(1102) | 36    | 58      | 1084   | 632     |
| kris_sarat | Sarati                  | Krishna      | P.India | 6807   | 615(1364) | 51    | 42      | 832    | 510     |
| kris_shimo | Shimoga                 | Krishna      | P.India | 2761   | 672(1431) | 5     | 92      | 2304   | 1020    |
| kris_shird | Shirdhon                | Krishna      | P.India | 611    | 533(700)  | 60    | 32      | 544    | 509     |
| kris_takli | Takli                   | Krishna      | P.India | 33532  | 587(1434) | 53    | 39      | 813    | 524     |
| kris_talik | Talikot                 | Krishna      | P.India | 2434   | 599(744)  | 77    | 20      | 558    | 537     |
| kris_terwa | Terwad (Seasonal)       | Krishna      | P.India | 2444   | 598(1002) | 31    | 59      | 1469   | 673     |
| kris_trama | T. Ramapuram (Seasonal) | Krishna      | P.India | 23527  | 646(1830) | 49    | 43      | 566    | 516     |
| kris_wadak | Wadakbal                | Krishna      | P.India | 12094  | 556(958)  | 66    | 29      | 681    | 475     |
| kris_waden | Wadenapally             | Krishna      | P.India | 240055 | 561(1830) | 54    | 39      | 762    | 570     |
| kris_warun | Warunjli                | Krishna      | P.India | 1909   | 745(1396) | 19    | 74      | 1435   | 676     |
| kris_yadgi | Yadgir                  | Krishna      | P.India | 69779  | 547(1434) | 61    | 33      | 752    | 519     |
| maha_andhi | Andhiyarkhore           | Mahanadi     | P.India | 2229   | 365(958)  | 52    | 45      | 1100   | 610     |
| maha_bamni | Bamnidhi                | Mahanadi     | P.India | 9860   | 477(1107) | 35    | 60      | 1320   | 624     |
| maha_baron | Baronda                 | Mahanadi     | P.India | 3238   | 439(916)  | 16    | 82      | 1239   | 656     |
| maha_basan | Basantpur               | Mahanadi     | P.India | 59091  | 333(1131) | 49    | 46      | 1204   | 590     |
| maha_ghato | Ghatora                 | Mahanadi     | P.India | 2965   | 377(1131) | 36    | 61      | 1277   | 637     |
| maha_jondh | Jondhra                 | Mahanadi     | P.India | 29822  | 314(1131) | 57    | 38      | 1161   | 576     |
| maha_kanta | Kantamal                | Mahanadi     | P.India | 20374  | 298(1280) | 36    | 62      | 1411   | 645     |
| maha_kesin | Kesinga                 | Mahanadi     | P.India | 11956  | 296(1076) | 41    | 56      | 1391   | 629     |
| maha_kotni | Kotni                   | Mahanadi     | P.India | 7098   | 341(746)  | 54    | 40      | 1212   | 580     |
| maha_kurub | Kurubhata               | Mahanadi     | P.India | 4781   | 391(1138) | 38    | 60      | 1332   | 610     |
| maha_manen | Manendragarh            | Mahanadi     | P.India | 1026   | 681(1018) | 29    | 68      | 1268   | 648     |
| maha_patha | Patharidih              | Mahanadi     | P.India | 2484   | 306(445)  | 69    | 22      | 1164   | 543     |
| maha_rajim | Rajim                   | Mahanadi     | P.India | 8511   | 419(916)  | 30    | 66      | 1251   | 631     |
| maha_rampu | Rampur                  | Mahanadi     | P.India | 3451   | 320(808)  | 48    | 49      | 1187   | 570     |
| maha_saleb | Salebhata               | Mahanadi     | P.India | 4672   | 249(996)  | 54    | 43      | 1357   | 564     |
| maha_seori | Seorinarayan            | Mahanadi     | P.India | 48030  | 321(1131) | 52    | 44      | 1180   | 583     |
| maha_simga | Simga                   | Mahanadi     | P.India | 16903  | 317(852)  | 59    | 35      | 1162   | 560     |
| maha_sunde | Sundergarh              | Mahanadi     | P.India | 5937   | 479(1129) | 43    | 55      | 1370   | 605     |
| maha_tikar | Tikarapara              | Mahanadi     | P.India | 126896 | 309(1280) | 45    | 51      | 1310   | 615     |
| mahi_chaka | Chakaliya               | Mahi         | P.India | 3608   | 356(562)  | 50    | 46      | 872    | 404     |
| mahi_dhari | Dhariawad               | Mahi         | P.India | 1272   | 458(578)  | 48    | 50      | 760    | 423     |
| mahi_khanp | Khanpur                 | Mahi         | P.India | 33306  | 300(972)  | 50    | 46      | 831    | 418     |
| mahi_mataj | Mataji                  | Mahi         | P.India | 3769   | 459(581)  | 60    | 34      | 950    | 427     |
| mahi_pader | Paderibadi              | Mahi         | P.India | 16472  | 399(972)  | 48    | 48      | 795    | 420     |
| mahi_range | Rangeli                 | Mahi         | P.India | 8586   | 384(972)  | 43    | 54      | 678    | 412     |
| narm_bamni | Bamni                   | Narmada      | P.India | 2579   | 581(883)  | 30    | 68      | 1232   | 601     |
| narm_barma | Barmanghat              | Narmada      | P.India | 26298  | 555(1128) | 42    | 55      | 1226   | 562     |
| narm_belkh | Belkheri                | Narmada      | P.India | 1490   | 582(884)  | 46    | 52      | 1137   | 498     |
| narm_chhid | Chhidgaon               | Narmada      | P.India | 1765   | 512(789)  | 34    | 65      | 1205   | 521     |
| narm_dhuls | Dhulsar                 | Narmada      | P.India | 787    | 316(565)  | 52    | 46      | 790    | 449     |
| narm_dindo | Dindori                 | Narmada      | P.India | 2327   | 804(1128) | 37    | 60      | 1242   | 613     |
| narm_gadar | Gadarwara               | Narmada      | P.India | 2232   | 634(1077) | 33    | 64      | 1123   | 519     |
| narm_garud | Garudeshwar             | Narmada      | P.India | 87739  | 396(1286) | 49    | 47      | 1069   | 517     |
| narm_handi | Handia                  | Narmada      | P.India | 52734  | 470(1286) | 46    | 51      | 1212   | 542     |
| narm_hosha | Hoshangabad             | Narmada      | P.India | 45142  | 490(1286) | 44    | 53      | 1218   | 548     |
| narm_kogao | Kogaon                  | Narmada      | P.India | 3934   | 325(928)  | 60    | 37      | 798    | 465     |
| narm_mand2 | Mandleshwar             | Narmada      | P.India | 72673  | 416(1286) | 49    | 47      | 1129   | 529     |
| narm_manot | Manot                   | Narmada      | P.India | 4943   | 760(1128) | 37    | 60      | 1228   | 604     |
| narm_mohga | Mohgaon                 | Narmada      | P.India | 3998   | 677(996)  | 28    | 70      | 1230   | 616     |
| narm_morta | Mortakka                | Narmada      | P.India | 66679  | 428(1286) | 48    | 49      | 1158   | 534     |
| narm_patan | Patan                   | Narmada      | P.India | 4088   | 408(732)  | 58    | 38      | 1197   | 501     |
| narm_patix | Pati                    | Narmada      | P.India | 1668   | 437(966)  | 47    | 48      | 733    | 441     |
| narm_sandi | Sandia                  | Narmada      | P.India | 32918  | 531(1184) | 44    | 53      | 1209   | 550     |
| penn_allad | Alladupalli             | Pennar       | P.India | 8395   | 246(884)  | 48    | 46      | 759    | 581     |
| penn_chenn | Chennur                 | Pennar       | P.India | 37721  | 431(1320) | 46    | 46      | 660    | 538     |
| penn_kamal | Kamalapuram             | Pennar       | P.India | 7157   | 566(1241) | 42    | 50      | 676    | 531     |
| penn_nandi | Nandipalli              | Pennar       | P.India | 2461   | 263(839)  | 33    | 62      | 815    | 617     |
| penn_singa | Singavaram              | Pennar       | P.India | 5960   | 540(1150) | 44    | 47      | 619    | 529     |
| penn_tadap | Tadapatri               | Pennar       | P.India | 12473  | 543(1320) | 48    | 43      | 583    | 515     |
| saba_derol | Derol Bridge            | Sabarmati    | P.India | 6396   | 392(1096) | 39    | 58      | 706    | 436     |
| saba_vauth | Vautha                  | Sabarmati    | P.India | 18325  | 163(1096) | 52    | 43      | 780    | 412     |
| sube_adity | Adityapur               | Subernarekha | P.India | 6350   | 281(913)  | 39    | 57      | 1398   | 649     |
| sube_ghats | Ghatsila                | Subernarekha | P.India | 14291  | 286(980)  | 38    | 57      | 1308   | 649     |

Continued on next page

Table S2.2 – continued from previous page

| GHI ID      | Site           | Basin        | Region  | Area  | Elev       | %Crop | %Forest | P (mm) | ET (mm) |
|-------------|----------------|--------------|---------|-------|------------|-------|---------|--------|---------|
| sube_govin  | Govindapur     | Subernarekha | P.India | 4450  | 100(1125)  | 31    | 67      | 1682   | 760     |
| sube_jams1  | Jamshedpur     | Subernarekha | P.India | 12785 | 299(980)   | 39    | 57      | 1293   | 650     |
| tapi_burha  | Burhanpur      | Tapi         | P.India | 9070  | 489(1145)  | 39    | 60      | 1065   | 530     |
| tapi_gopal  | Gopalkheda     | Tapi         | P.India | 8182  | 341(1144)  | 66    | 30      | 852    | 527     |
| tapi_saran  | Sarangkheda    | Tapi         | P.India | 55842 | 349(1439)  | 59    | 37      | 806    | 509     |
| tapi_yerli  | Yerli          | Tapi         | P.India | 15996 | 334(1144)  | 66    | 30      | 847    | 523     |
| wfrn_durve  | Durvesh        | WFR North    | P.India | 2040  | 162(1036)  | 34    | 61      | 2609   | 589     |
| wfrn_mahuw  | Mahuwa         | WFR North    | P.India | 1750  | 294(1295)  | 35    | 63      | 1277   | 549     |
| wfrn_nanip  | Nanipalson     | WFR North    | P.India | 763   | 420(807)   | 34    | 62      | 1909   | 552     |
| wfrn_ozerk  | Ozerkheda      | WFR North    | P.India | 678   | 386(1057)  | 33    | 64      | 2100   | 554     |
| wfrs_addoo  | Addoor         | WFR South    | P.India | 719   | 103(1834)  | 4     | 94      | 3966   | 1207    |
| wfrs_ambar  | Ambarampalayam | WFR South    | P.India | 950   | 383(2450)  | 14    | 82      | 967    | 886     |
| wfrs_arang  | Arangaly       | WFR South    | P.India | 1342  | 698(2253)  | 1     | 96      | 2382   | 1150    |
| wfrs_avers  | Avershe        | WFR South    | P.India | 300   | 160(1104)  | 2     | 97      | 3903   | 1201    |
| wfrs_ayila  | Ayilam         | WFR South    | P.India | 556   | 112(1443)  | 1     | 96      | 1564   | 1329    |
| wfrs_bantw  | Bantwal        | WFR South    | P.India | 3295  | 161(1611)  | 2     | 96      | 3030   | 1176    |
| wfrs_erinj  | Erinjipuzha    | WFR South    | P.India | 912   | 190(1374)  | 1     | 98      | 3735   | 1198    |
| wfrs_halad  | Halady         | WFR South    | P.India | 566   | 251(865)   | 3     | 92      | 4075   | 1146    |
| wfrs_kalam  | Kalampur       | WFR South    | P.India | 386   | 71(1038)   | 1     | 96      | 3017   | 1251    |
| wfrs_kallo  | Kallooppara    | WFR South    | P.India | 733   | 104(1339)  | 1     | 96      | 3098   | 1234    |
| wfrs_karat  | Karathodu      | WFR South    | P.India | 794   | 67(1241)   | 4     | 93      | 2266   | 1123    |
| wfrs_kidan  | Kidangoor      | WFR South    | P.India | 618   | 83(1131)   | 2     | 95      | 3089   | 1226    |
| wfrs_kumbi  | Kumbidi        | WFR South    | P.India | 5867  | 144(2450)  | 15    | 79      | 1508   | 982     |
| wfrs_kuniy  | Kuniyil        | WFR South    | P.India | 2038  | 375(2516)  | 2     | 97      | 2108   | 1155    |
| wfrs_kuzhi  | Kuzhithurai    | WFR South    | P.India | 739   | 134(1735)  | 2     | 94      | 1244   | 1164    |
| wfrs_malak  | Malakkara      | WFR South    | P.India | 1650  | 412(1838)  | 1     | 97      | 1887   | 1229    |
| wfrs_neelee | Neeleswaram    | WFR South    | P.India | 4150  | 933(2558)  | 1     | 96      | 1987   | 1156    |
| wfrs_patta  | Pattazhy       | WFR South    | P.India | 1221  | 159(1711)  | 1     | 95      | 1862   | 1230    |
| wfrs_perum  | Perumannu      | WFR South    | P.India | 1069  | 414(1546)  | 1     | 97      | 1974   | 1199    |
| wfrs_pulam  | Pulamanthole   | WFR South    | P.India | 923   | 88(2294)   | 4     | 93      | 1749   | 1118    |
| wfrs_ramam  | Ramamangalam   | WFR South    | P.India | 1482  | 56(1041)   | 3     | 92      | 3081   | 1270    |
| wfrs_thump  | Thumpamon      | WFR South    | P.India | 839   | 172(1728)  | 1     | 97      | 1789   | 1276    |
| wfrs_vandi  | Vandiperiyar   | WFR South    | P.India | 712   | 1088(1860) | 1     | 96      | 1187   | 1069    |
| wfrs_yenne  | Yennehole      | WFR South    | P.India | 357   | 101(1174)  | 1     | 97      | 3724   | 1247    |

## S3 Precipitation

Graphics and tables on  $P$  datasets presented here include:

- maps of average annual  $P$  for WY 2007-2014;
- table showing basin-scale ratio of  $P$  from each product against IMD for WY 2007-2014;
- maps of monthly total  $P$  corresponding to three flooding events - Assam flooding of June 2012, Jammu and Kashmir flooding of September 2014 and Kerala flooding of August 2018; and
- time series of basin-averaged  $P$  for each product compared against IMD, and trends associated with such time series.

### S3.1 Average Annual Precipitation, WY 2007-2014

For each of the 12  $P$  products analyzed in this study, annual average  $P$  for the common eight year period of WY 2007-2014 is presented in Figures S3.1 to S3.12. It can be seen that all of the products have the broad spatial pattern of relatively wet Western Coast, Northeastern India and Northernmost India. The relatively dry regions of Northwestern India and interior Peninsular India are also evident in these maps.

The ratio of basin-averaged annual  $P$  between each product and IMD is presented in Table S3.1. The same common data period of WY 2007-2014 is used for estimating these ratios. A ratio greater (smaller) than 1.0 indicates that  $P$  from the particular product is higher (lower) than IMD. Across the whole of India, ERA5 and IMDAA have the highest ratios (1.15 and 1.31, respectively), while APHRO and GSMAP have the lowest ratios (0.91 and 0.90, respectively). In general, ERA5 and IMDAA have values greater than 1.0 for most river basins in India.

APHRO, WY 2007–2014, Average Precipitation (mm/year)

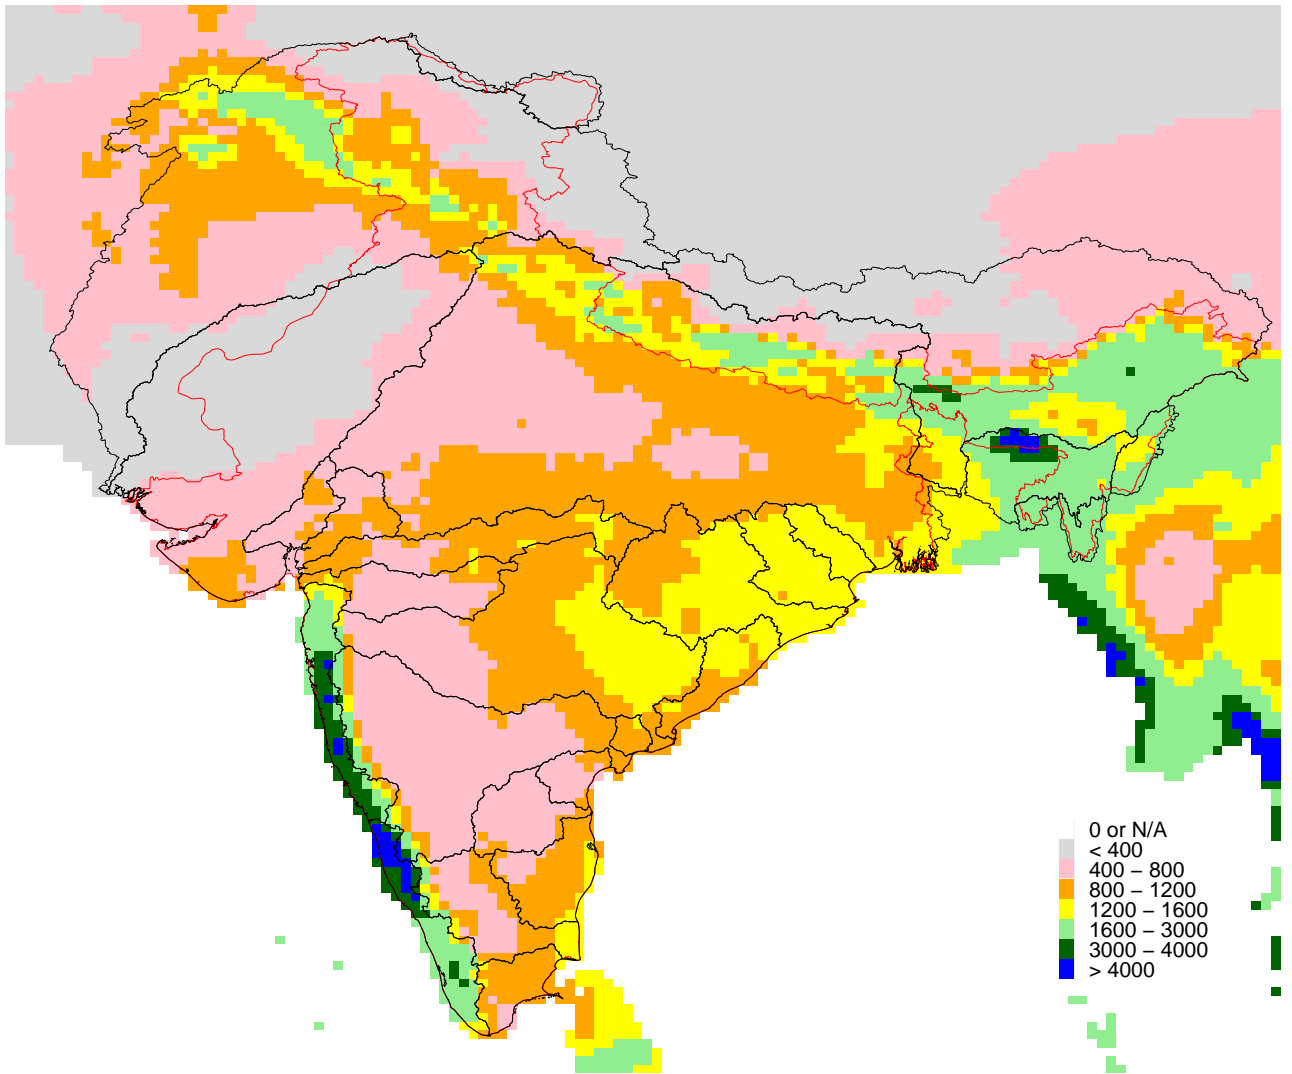

Figure S3.1: Annual average precipitation from APHRO.



CHIRPS, WY 2007–2014, Average Precipitation (mm/year)

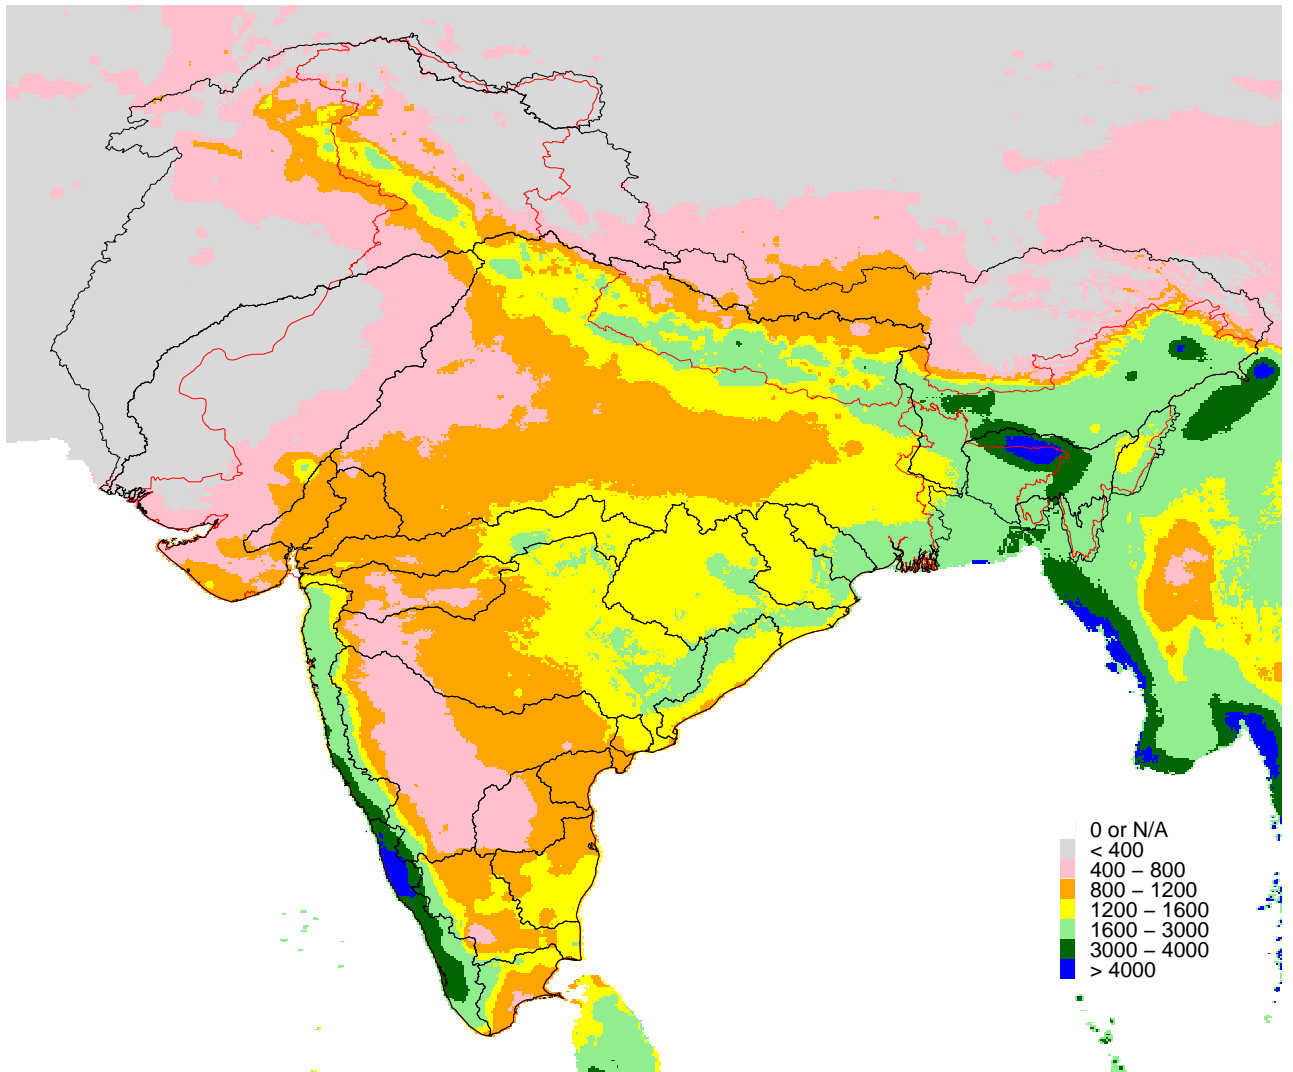

Figure S3.2: Annual average precipitation from CHIRPS.

CMORPH, WY 2007–2014, Average Precipitation (mm/year)

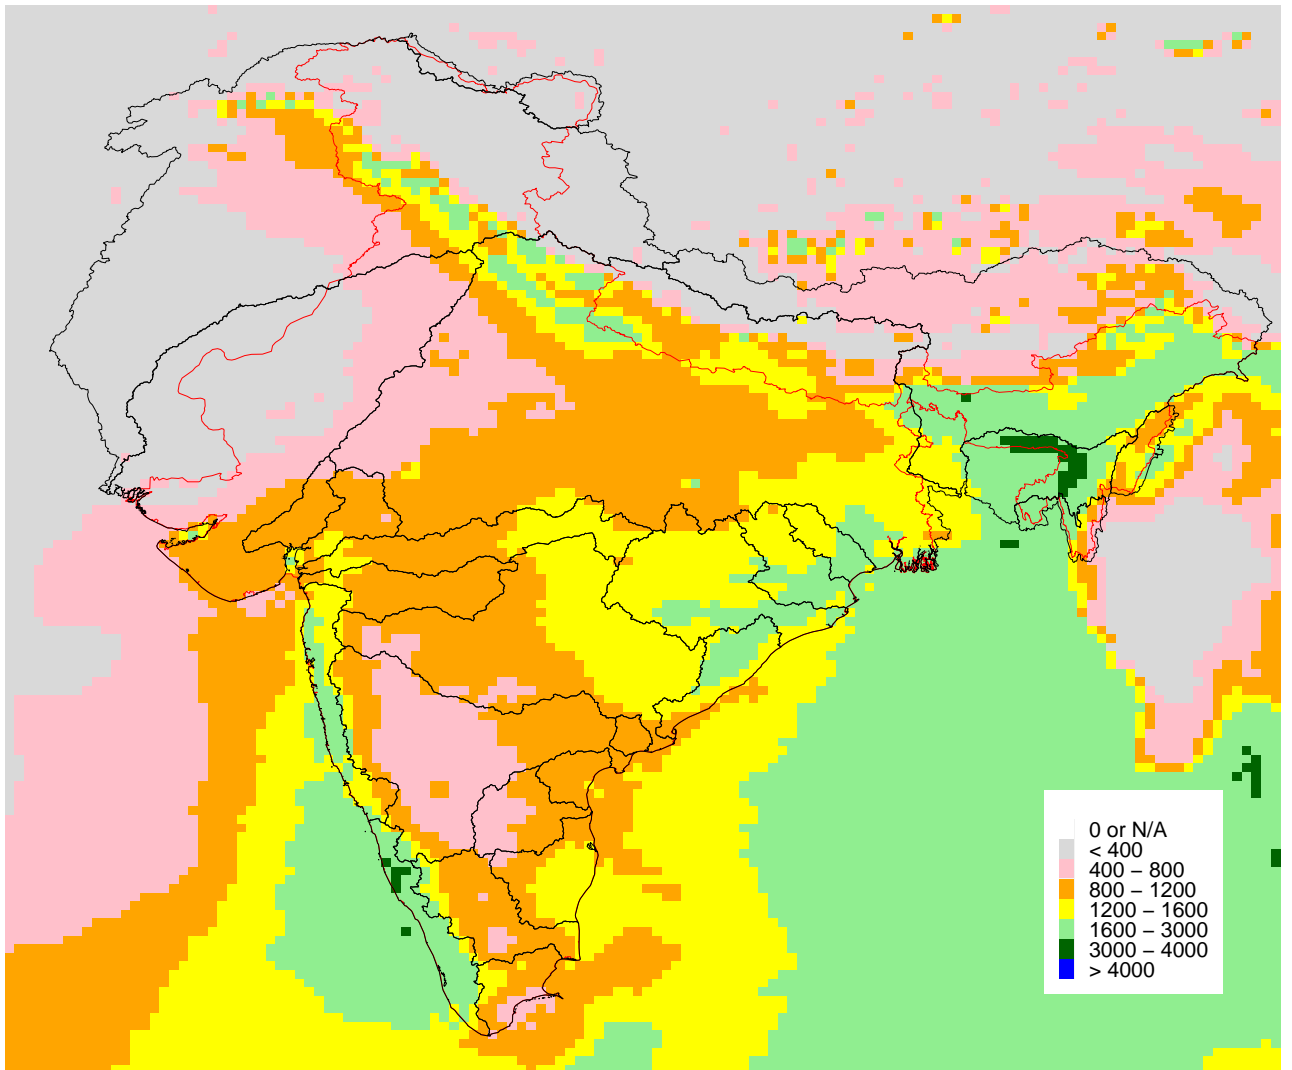

Figure S3.3: Annual average precipitation from CMORPH.

ERA5, WY 2007–2014, Average Precipitation (mm/year)

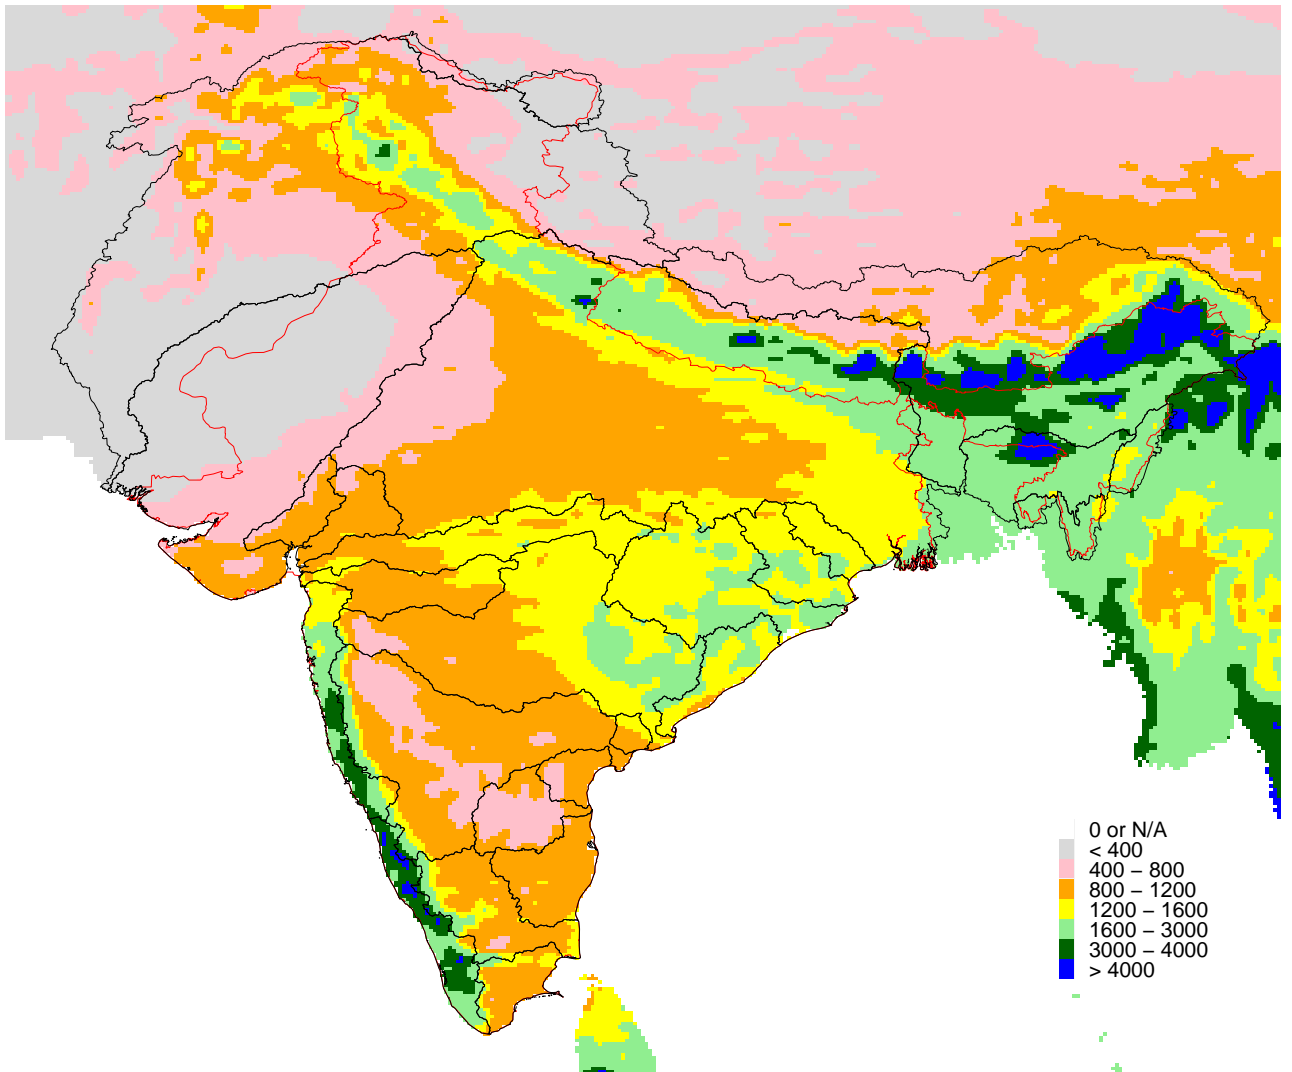

Figure S3.4: Annual average precipitation from ERA5.

GSMAP, WY 2007–2014, Average Precipitation (mm/year)

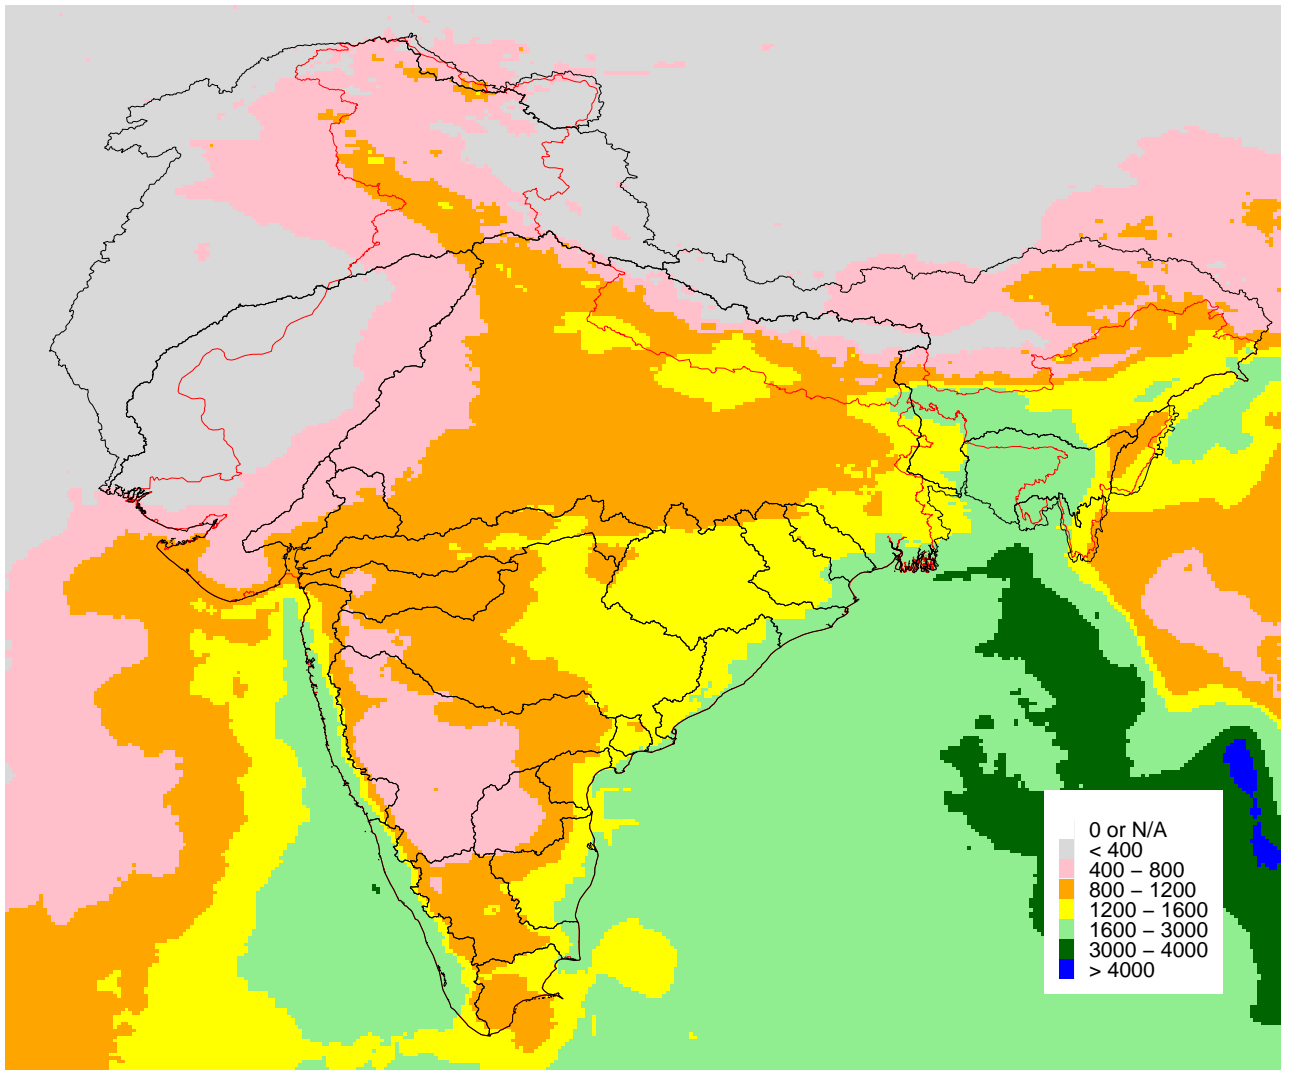

Figure S3.5: Annual average precipitation from GSMAP.

IMD, WY 2007–2014, Average Precipitation (mm/year)

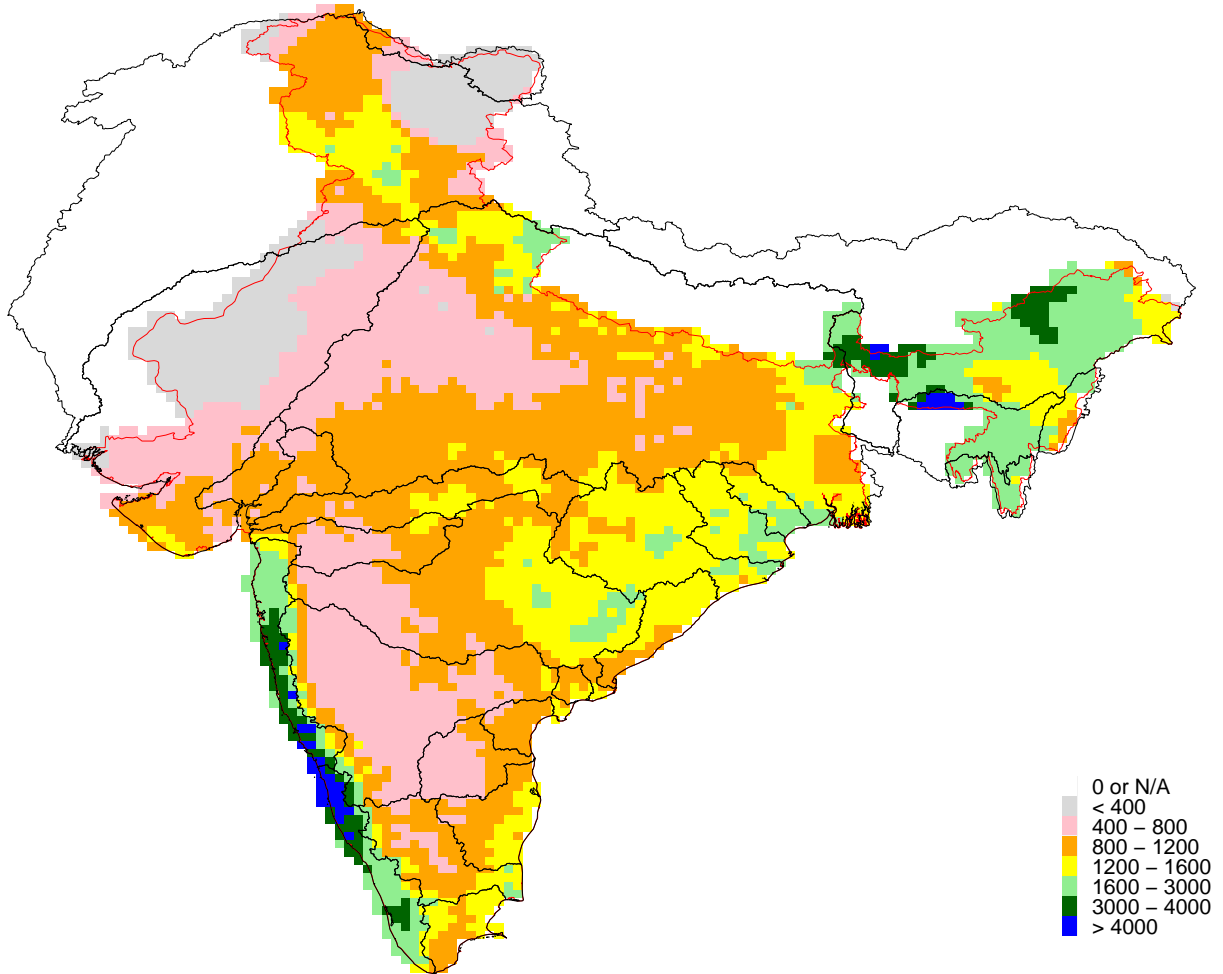

Figure S3.6: Annual average precipitation from IMD.

IMDAA, WY 2007–2014, Average Precipitation (mm/year)

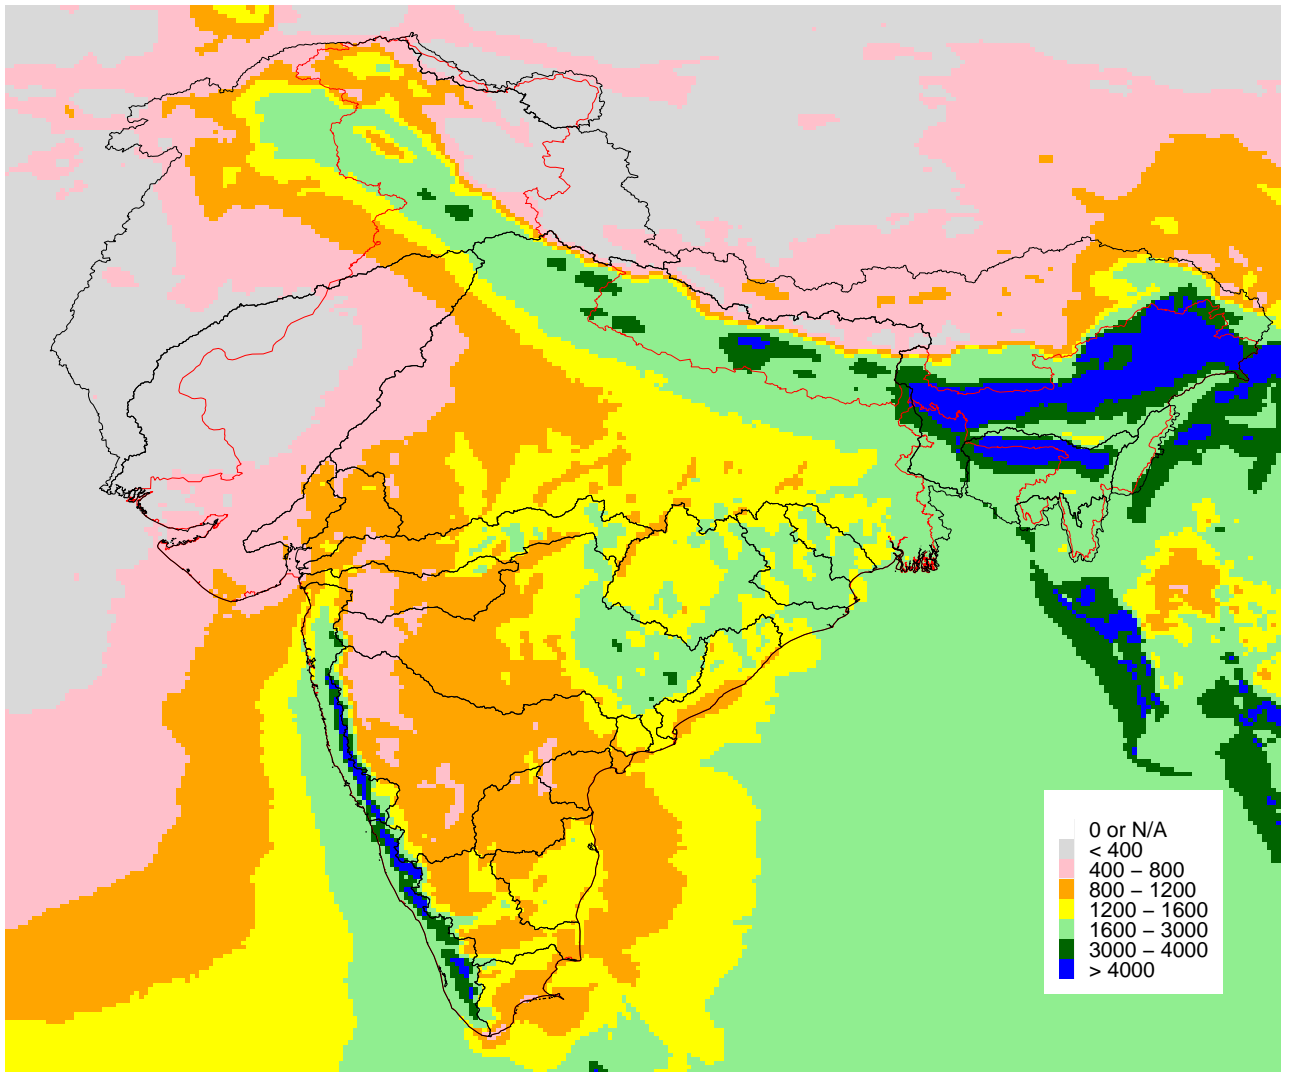

Figure S3.7: Annual average precipitation from IMDAA.

IMERG, WY 2007–2014, Average Precipitation (mm/year)

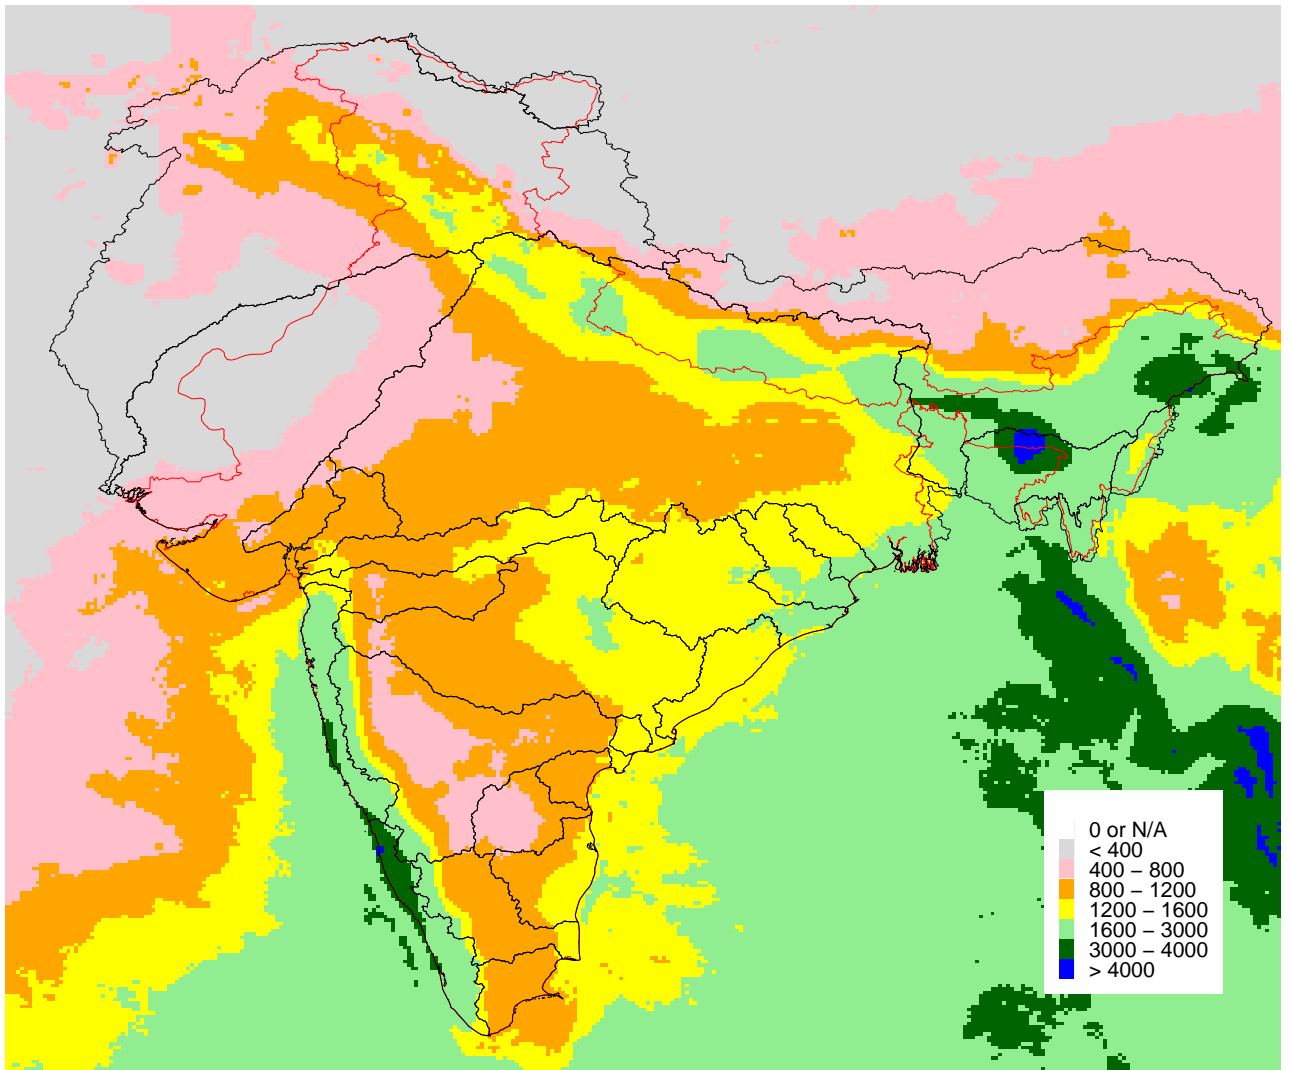

Figure S3.8: Annual average precipitation from IMERG.

MSWEP, WY 2007–2014, Average Precipitation (mm/year)

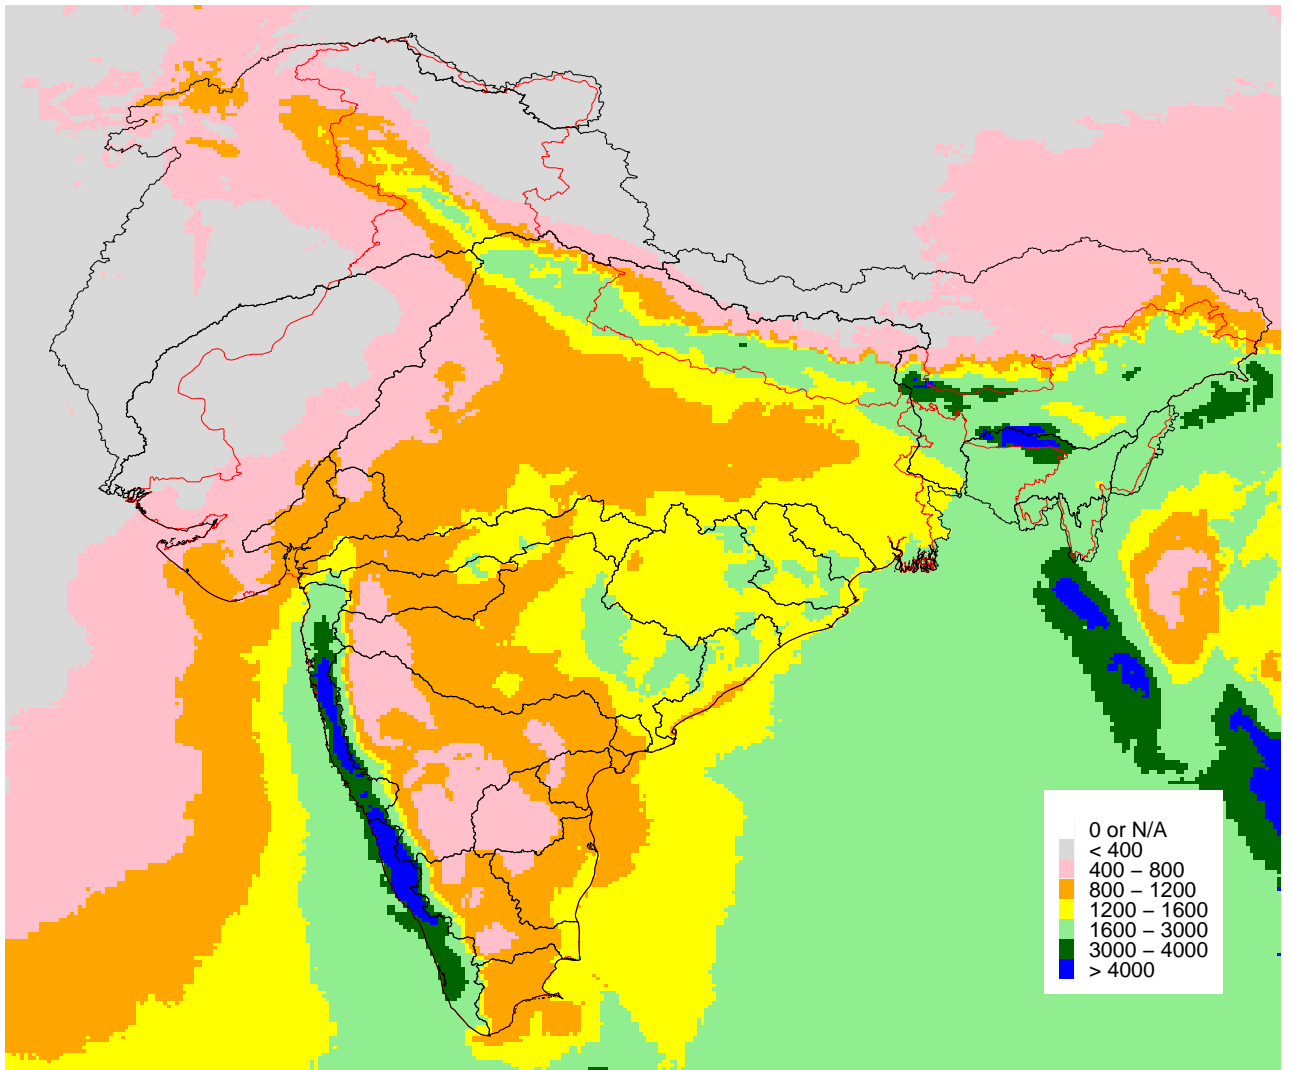

Figure S3.9: Annual average precipitation from MSWEP.



PERSIANN, WY 2007–2014, Average Precipitation (mm/year)

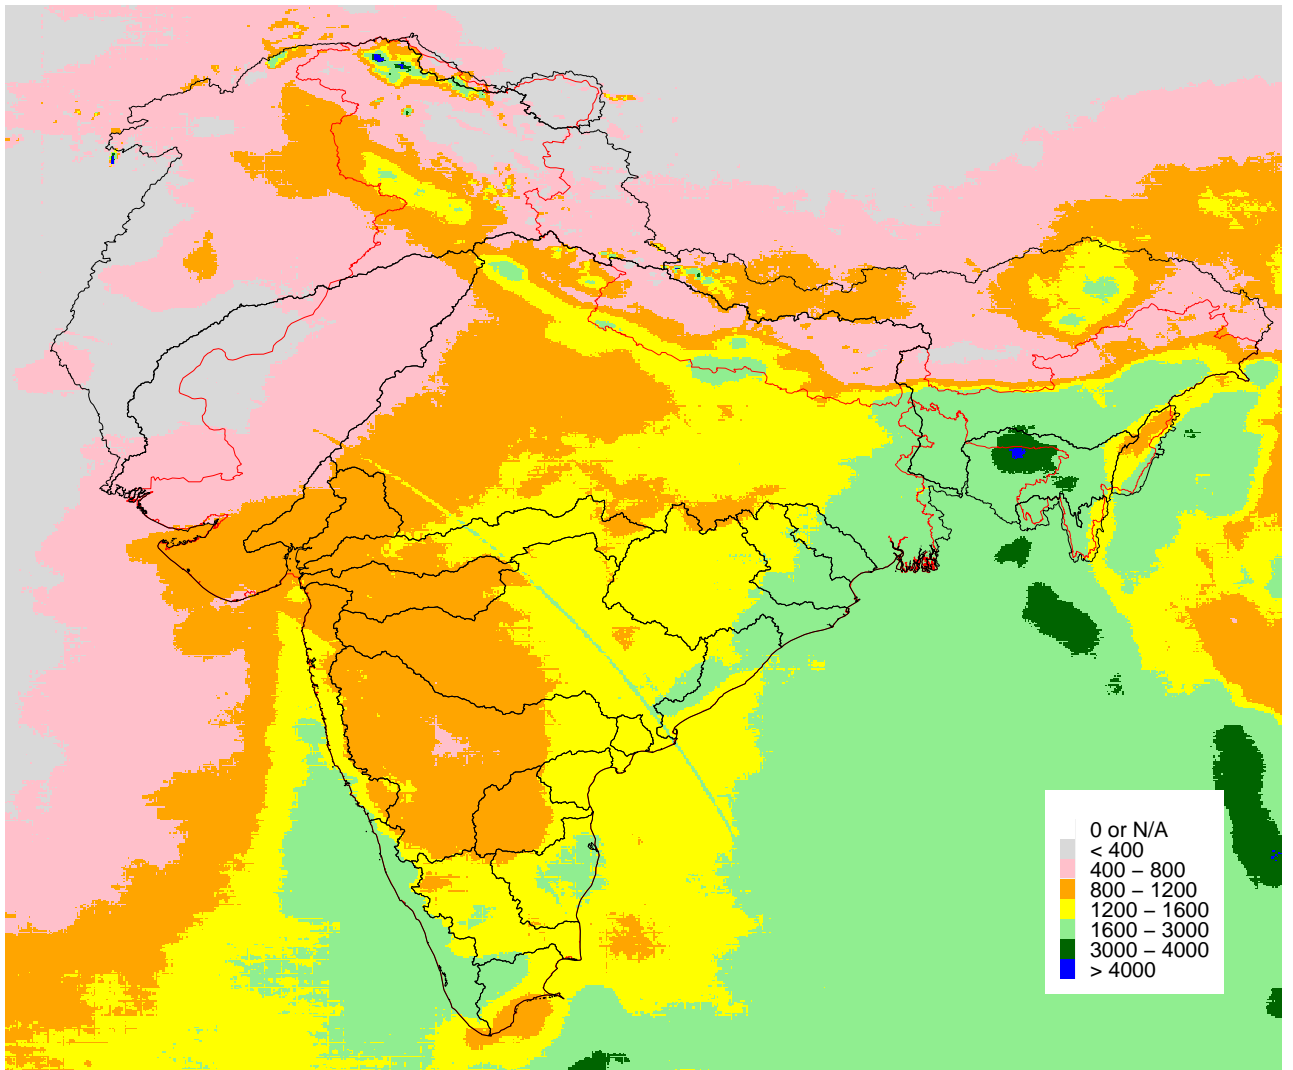

Figure S3.10: Annual average precipitation from PERSIANN.

SM2RAIN, WY 2007–2014, Average Precipitation (mm/year)

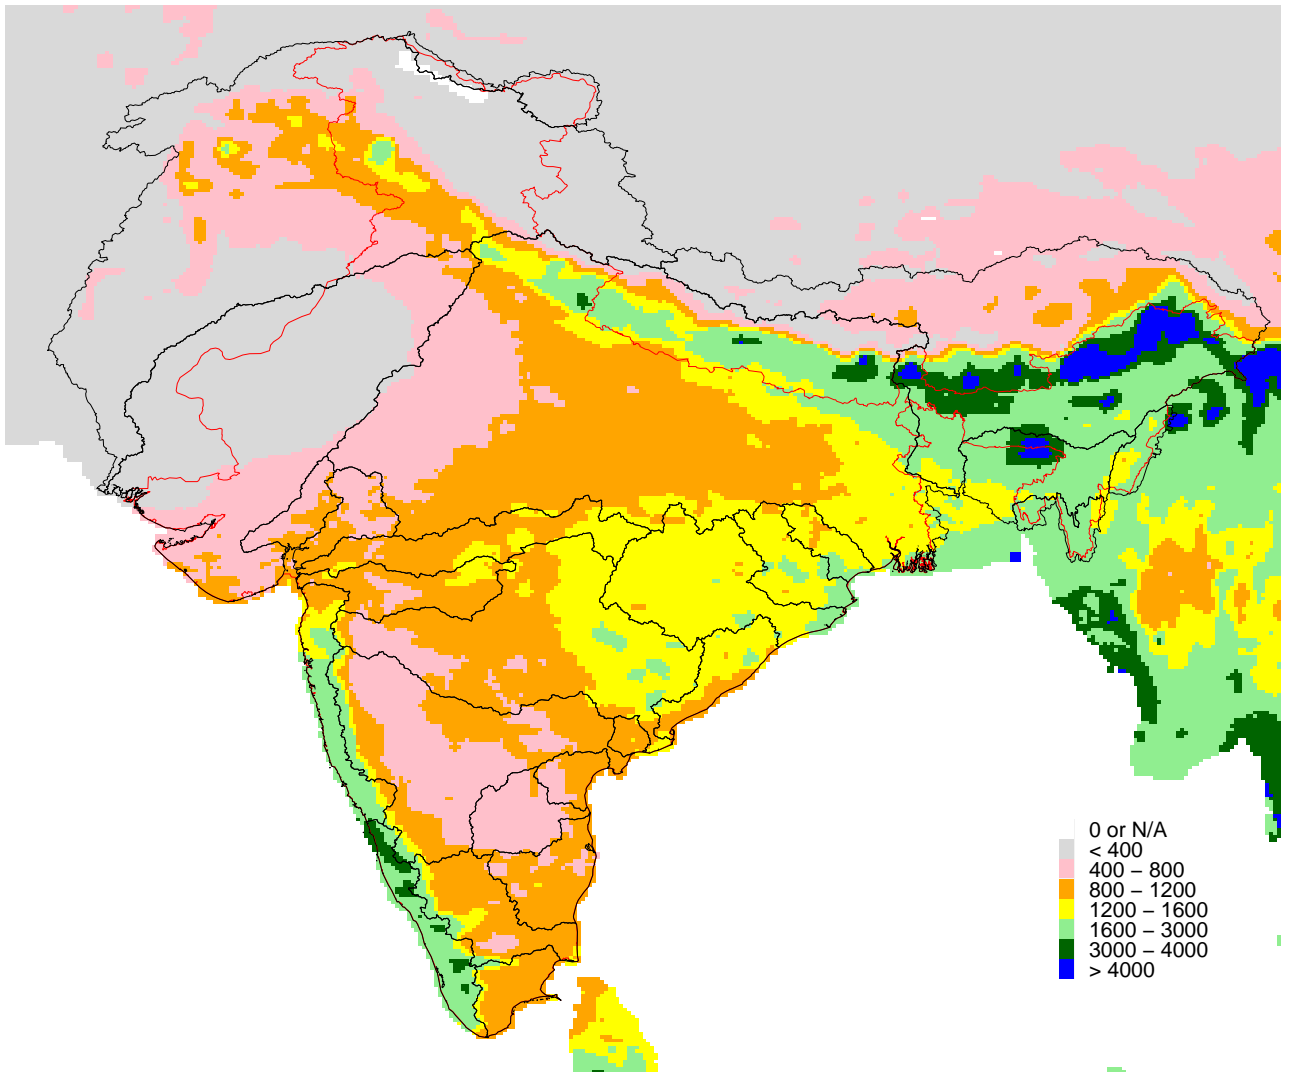

Figure S3.11: Annual average precipitation from SM2RAIN.

TERRA, WY 2007–2014, Average Precipitation (mm/year)

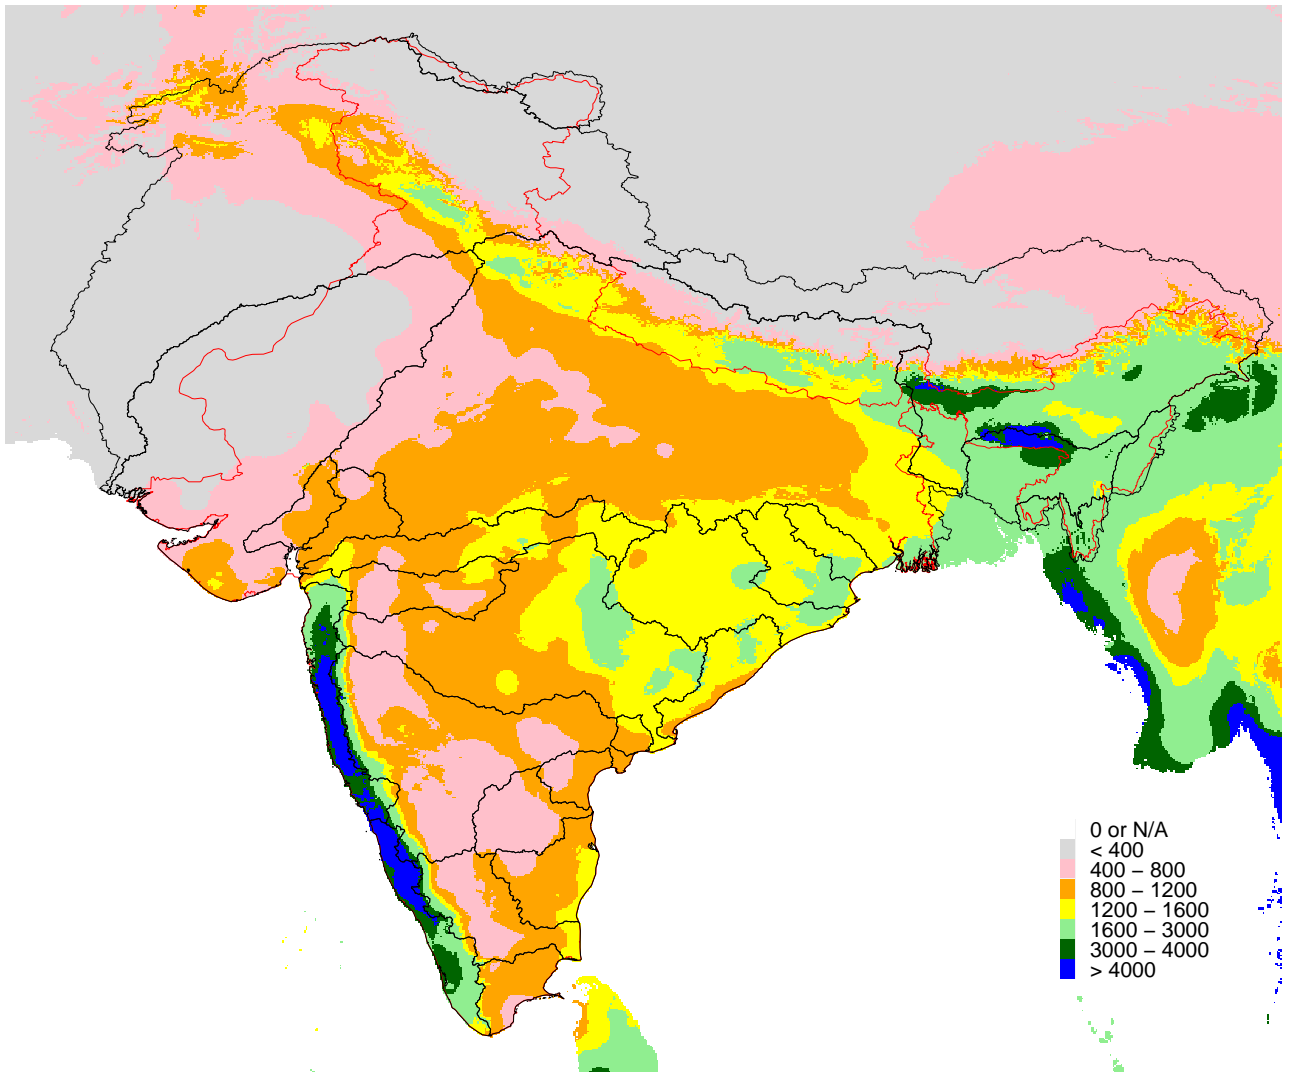

Figure S3.12: Annual average precipitation from TERRA.

Table S3.1: Annual  $P$  (mm/year) from IMD for WY 2007-2014, and the ratio of  $P$  from each dataset to  $P$  from IMD. Data is presented for each of the major river basins. The spatial domain is limited to the political boundaries of India where IMD data is available. Basin-scale aggregation of gridded  $P$  was performed only using the grids falling within India's boundaries.

| Basin              | IMD (mm) | APHRO | CHIRPS | CMORPH | ERA5 | GSMAP | IMDAA | IMERG | MSWEP | PERSIANN | SM2RAIN | TERRA |
|--------------------|----------|-------|--------|--------|------|-------|-------|-------|-------|----------|---------|-------|
| All India          | 1,114    | 0.91  | 1.05   | 0.96   | 1.15 | 0.90  | 1.31  | 1.07  | 1.07  | 1.07     | 1.00    | 1.02  |
| Barak              | 2,661    | 0.89  | 1.10   | 0.94   | 0.91 | 0.71  | 1.29  | 1.03  | 1.01  | 0.92     | 0.88    | 1.08  |
| Brahmaputra        | 2,193    | 0.83  | 0.97   | 0.80   | 1.62 | 0.62  | 1.96  | 1.10  | 0.96  | 0.69     | 1.43    | 0.94  |
| Ganga              | 983      | 0.91  | 1.14   | 1.09   | 1.18 | 1.03  | 1.44  | 1.16  | 1.16  | 1.24     | 1.06    | 1.03  |
| Indus              | 886      | 0.82  | 0.71   | 0.60   | 1.07 | 0.67  | 1.33  | 0.76  | 0.68  | 0.90     | 0.53    | 0.59  |
| Minor              | 1,681    | 1.10  | 1.23   | 0.84   | 1.13 | 0.81  | 1.32  | 1.23  | 1.33  | 1.00     | 1.09    | 1.38  |
| North Ladakh       | 424      | 0.63  | 0.39   | 0.28   | 0.73 | 0.88  | 0.48  | 0.12  | 0.40  | 1.03     | 0.18    | 0.07  |
| WFR Kutch          | 514      | 0.89  | 0.99   | 1.03   | 0.92 | 0.87  | 0.97  | 1.09  | 0.93  | 1.20     | 0.81    | 0.89  |
| Brahmani-Baitarani | 1,482    | 0.90  | 1.02   | 1.05   | 1.03 | 0.95  | 1.15  | 1.03  | 1.05  | 1.10     | 0.99    | 1.03  |
| Cauvery            | 1,086    | 0.91  | 1.19   | 0.97   | 1.16 | 0.97  | 1.19  | 1.08  | 1.06  | 1.26     | 1.03    | 0.99  |
| EFR North          | 1,127    | 0.93  | 1.15   | 1.18   | 1.13 | 1.26  | 1.13  | 1.14  | 1.14  | 1.39     | 1.02    | 1.08  |
| EFR South          | 1,110    | 0.89  | 1.11   | 1.02   | 0.94 | 1.15  | 1.14  | 1.00  | 0.96  | 1.36     | 0.87    | 0.92  |
| Godavari           | 1,116    | 0.91  | 1.12   | 1.02   | 1.13 | 1.02  | 1.23  | 1.09  | 1.12  | 1.11     | 1.01    | 1.11  |
| Krishna            | 857      | 0.94  | 1.05   | 1.00   | 1.16 | 0.94  | 1.20  | 1.19  | 1.18  | 1.24     | 1.03    | 1.16  |
| Mahanadi           | 1,343    | 0.93  | 1.12   | 1.10   | 1.13 | 1.04  | 1.16  | 1.09  | 1.11  | 1.12     | 1.06    | 1.08  |
| Mahi               | 865      | 0.91  | 1.14   | 1.11   | 1.10 | 0.99  | 1.11  | 1.14  | 1.09  | 1.17     | 0.92    | 1.07  |
| Narmada            | 1,079    | 0.92  | 1.15   | 1.09   | 1.15 | 1.01  | 1.16  | 1.10  | 1.14  | 1.15     | 1.04    | 1.08  |
| Pennar             | 757      | 0.90  | 1.01   | 1.09   | 1.04 | 1.05  | 1.28  | 1.07  | 0.98  | 1.44     | 0.93    | 0.94  |
| Sabarmati          | 837      | 0.91  | 1.15   | 1.19   | 1.00 | 0.91  | 0.97  | 1.09  | 1.03  | 1.13     | 0.93    | 0.99  |
| Subernarekha       | 1,473    | 0.92  | 1.10   | 1.08   | 0.99 | 1.00  | 1.12  | 1.02  | 1.03  | 1.26     | 0.96    | 0.99  |
| Tapi               | 856      | 0.91  | 1.08   | 1.20   | 1.27 | 1.10  | 1.07  | 1.20  | 1.18  | 1.25     | 1.14    | 1.08  |
| WFR North          | 2,671    | 1.00  | 0.87   | 0.58   | 0.81 | 0.53  | 0.88  | 0.88  | 1.19  | 0.46     | 0.71    | 1.29  |
| WFR South          | 2,906    | 0.99  | 1.07   | 0.76   | 1.01 | 0.59  | 1.06  | 0.91  | 1.23  | 0.68     | 0.87    | 1.16  |

## S3.2 Select Flooding Events

Spatial maps of monthly gridded  $P$  from the various datasets for select major flooding events from the recent past are presented here. The events discussed here occurred in regions with mountainous terrain within the past 10 years and were identified from the Dartmouth Flood Observatory's global archive of major flood events (Brakenridge, 2023). These events include the flooding in the State of Assam (Northeastern India) in June 2012, flooding in the State of Jammu and Kashmir (Northernmost India) in September 2014, and flooding in the State of Kerala (Southwestern India) in August 2018.

For the Assam floods of 2012 (Figure S3.13), the heavy  $P$  cluster of greater than 1500  $mm/month$  present in IMD is also present in ERA5 and IMDAA. While the rest of the datasets have such a cluster to a smaller extent, CHIRPS and GSMAP do not have such a cluster. For the Jammu and Kashmir floods of 2014 (Figure S3.14), the heavy  $P$  cluster of 400-800 or greater than 800  $mm/month$  present in IMD is also present in several of the datasets. In some datasets, such as CHIRPS, IMERG and TERRA, the cluster is larger and contains  $P$  of higher magnitude than IMD. GSMAP, PERSIANN and SM2RAIN do not have such a cluster. For the Kerala floods of 2018 (Figure S3.15), the heavy  $P$  cluster of 1000-1500 or greater than 1500  $mm/month$  present in IMD is present only to a limited extent in IMDAA but absent in the rest of the datasets. While these maps correspond to unusually wet events, it is evident that there are substantial differences between the different datasets for such events.

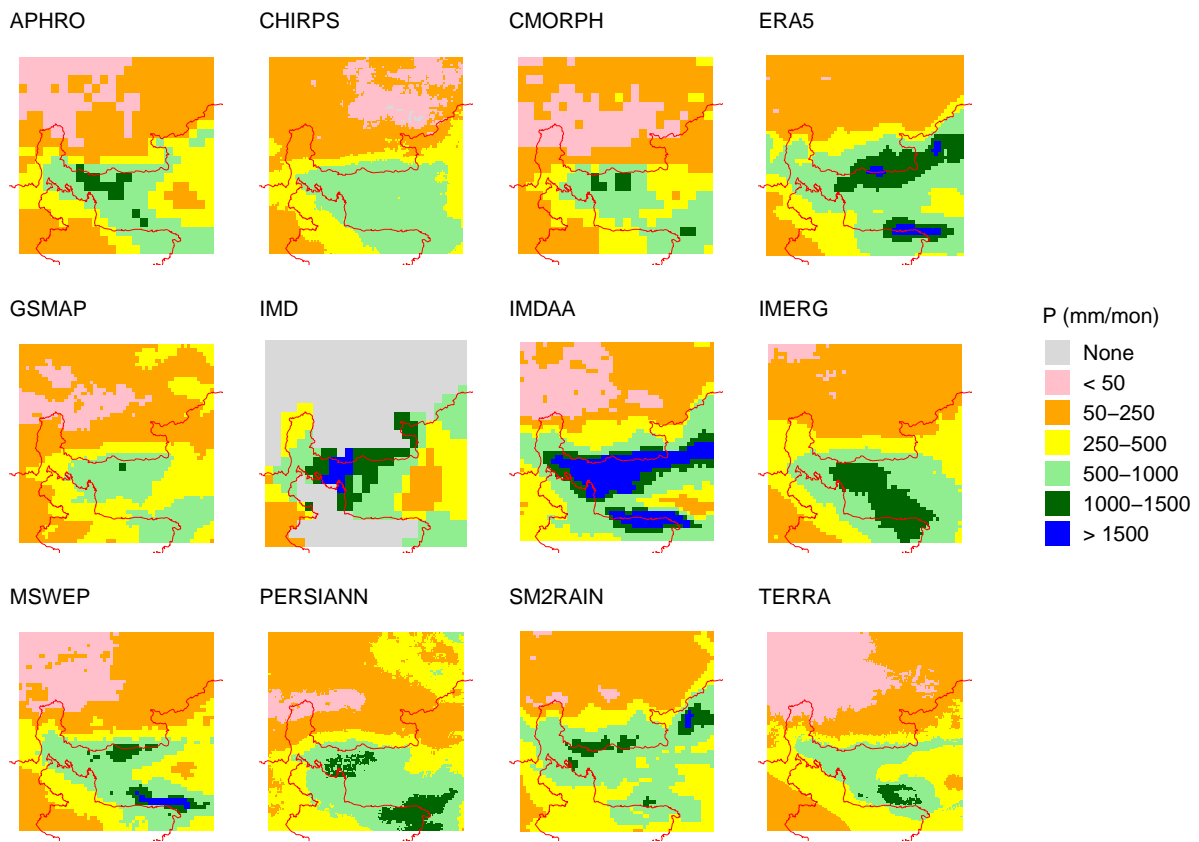

Figure S3.13: Total monthly  $P$  from various data sources for June 2012. Flooding in the state of Assam (Northeastern India) is the event of interest.

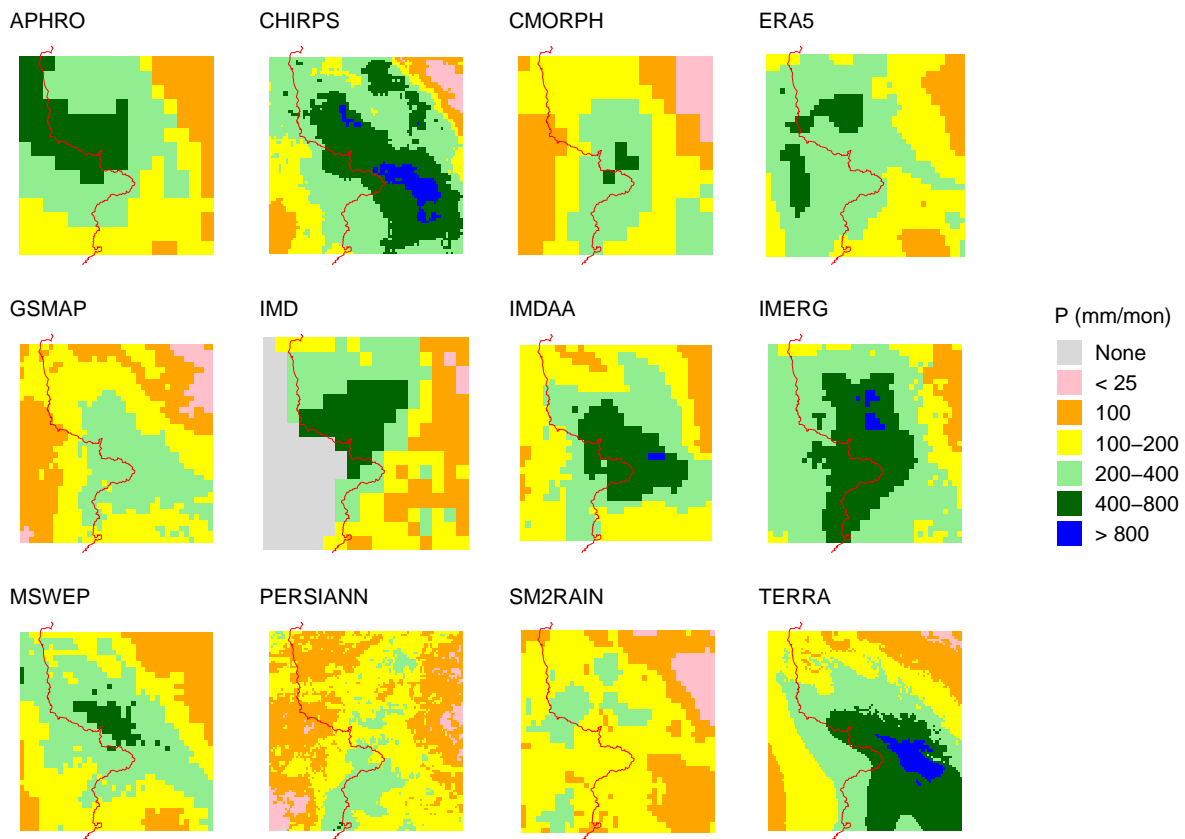

Figure S3.14: Total monthly  $P$  from various data sources for September 2014. Flooding in the state of Jammu and Kashmir (Northernmost India) is the event of interest.

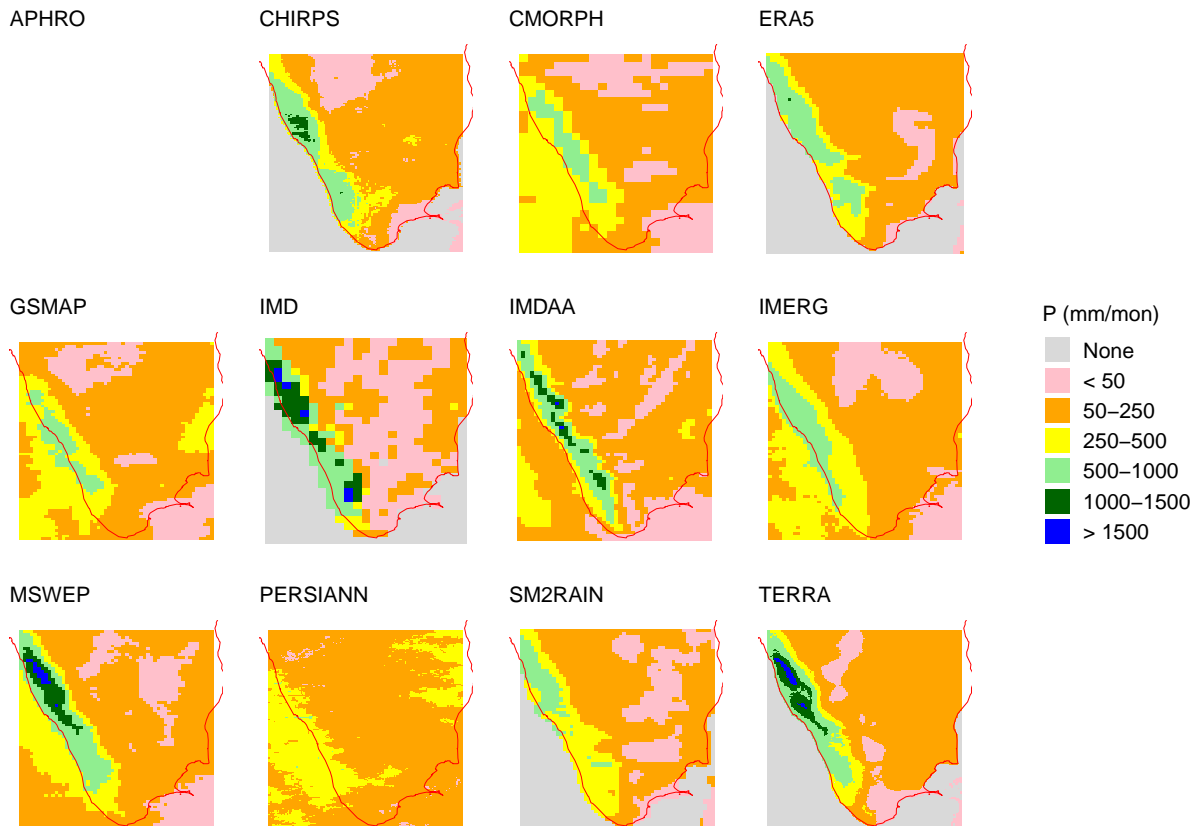

Figure S3.15: Total monthly  $P$  from various data sources for August 2018. Flooding in the state of Kerala (Southwestern India) is the event of interest. Data from APHRODITE is not available for WY 2018.



### S3.3 Trends in Precipitation

Time series of area-averaged annual  $P$  from IMD is compared with the corresponding time series from other datasets in Figures S3.16 to S3.38. For the purposes of this comparison, all datasets were limited to the boundaries of India since IMD is limited to such boundaries (i.e., IMD-APHRO is not used here). Basin-scale aggregation of gridded  $P$  was performed only using the grids falling within India's boundaries. The 9-year running average is also shown for each of the datasets to highlight the temporal trends in each of the datasets. The trends presented are based only on the period WY 1985-2014, if data was available.

All India, basin-averaged WY-based annual precipitation (mm/year)

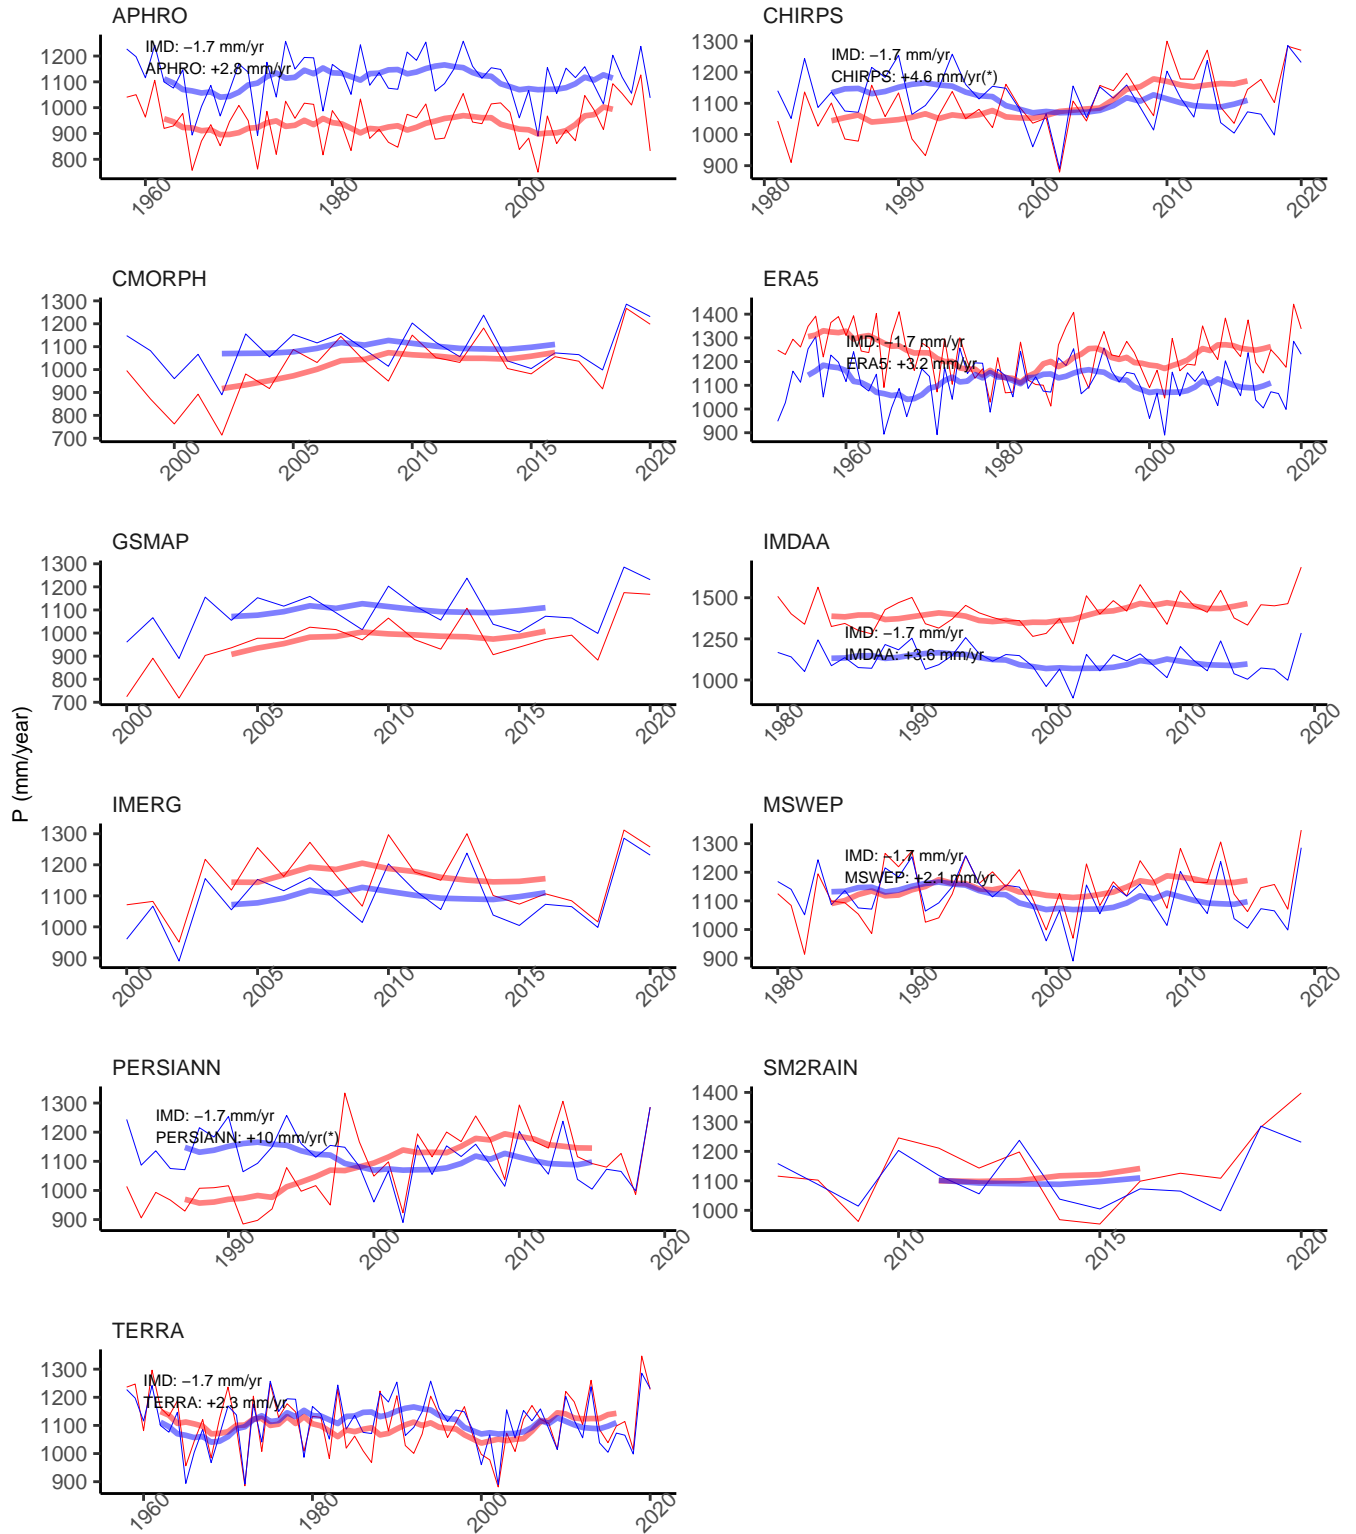

Figure S3.16: Annual  $P$  across India from IMD (blue) and other datasets (red). 9-year moving average values shown by the thick line. Theil-Sen slope for the period WY 1985-2014 is presented in units of mm/year, with statistically significant values indicated by ‘(\*)’.

Barak, basin-averaged WY-based annual precipitation (mm/year)

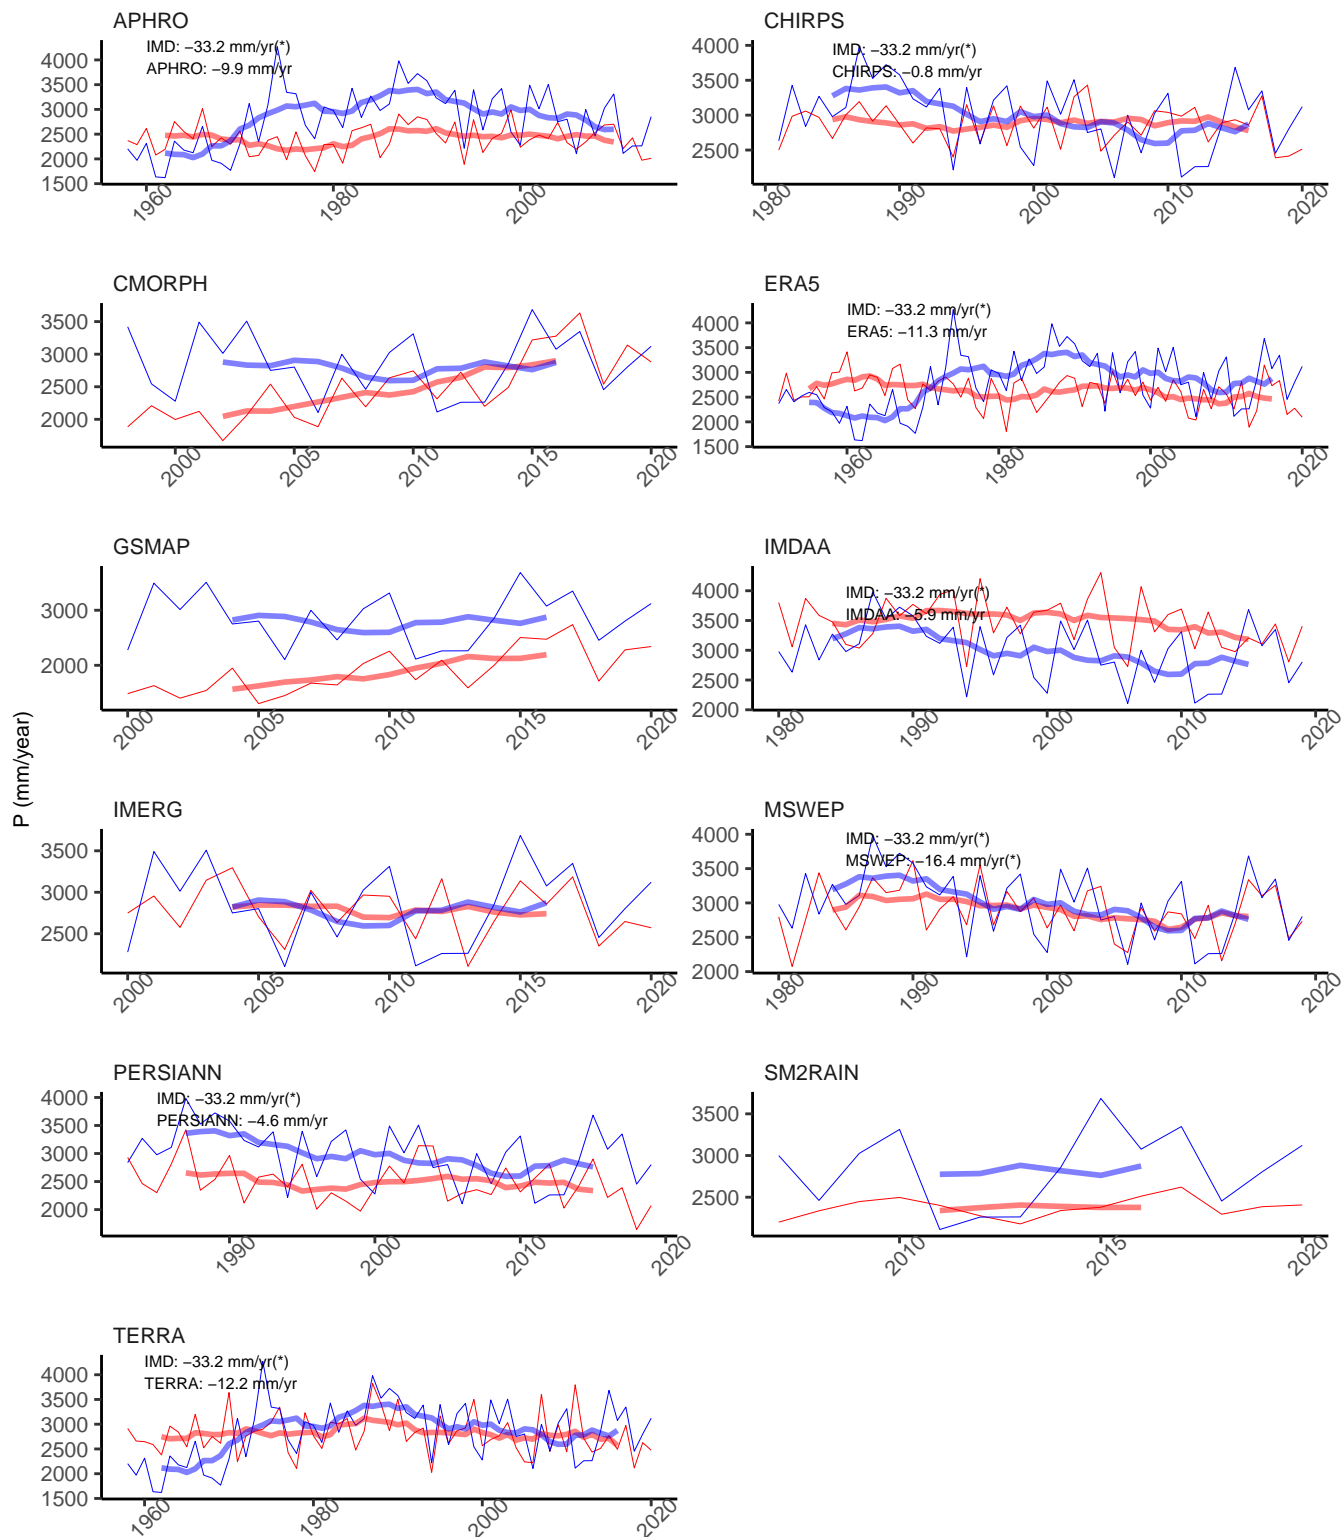

Figure S3.17: Same as Figure S3.16, except for the Barak Basin.

Brahmaputra, basin-averaged WY-based annual precipitation (mm/year)

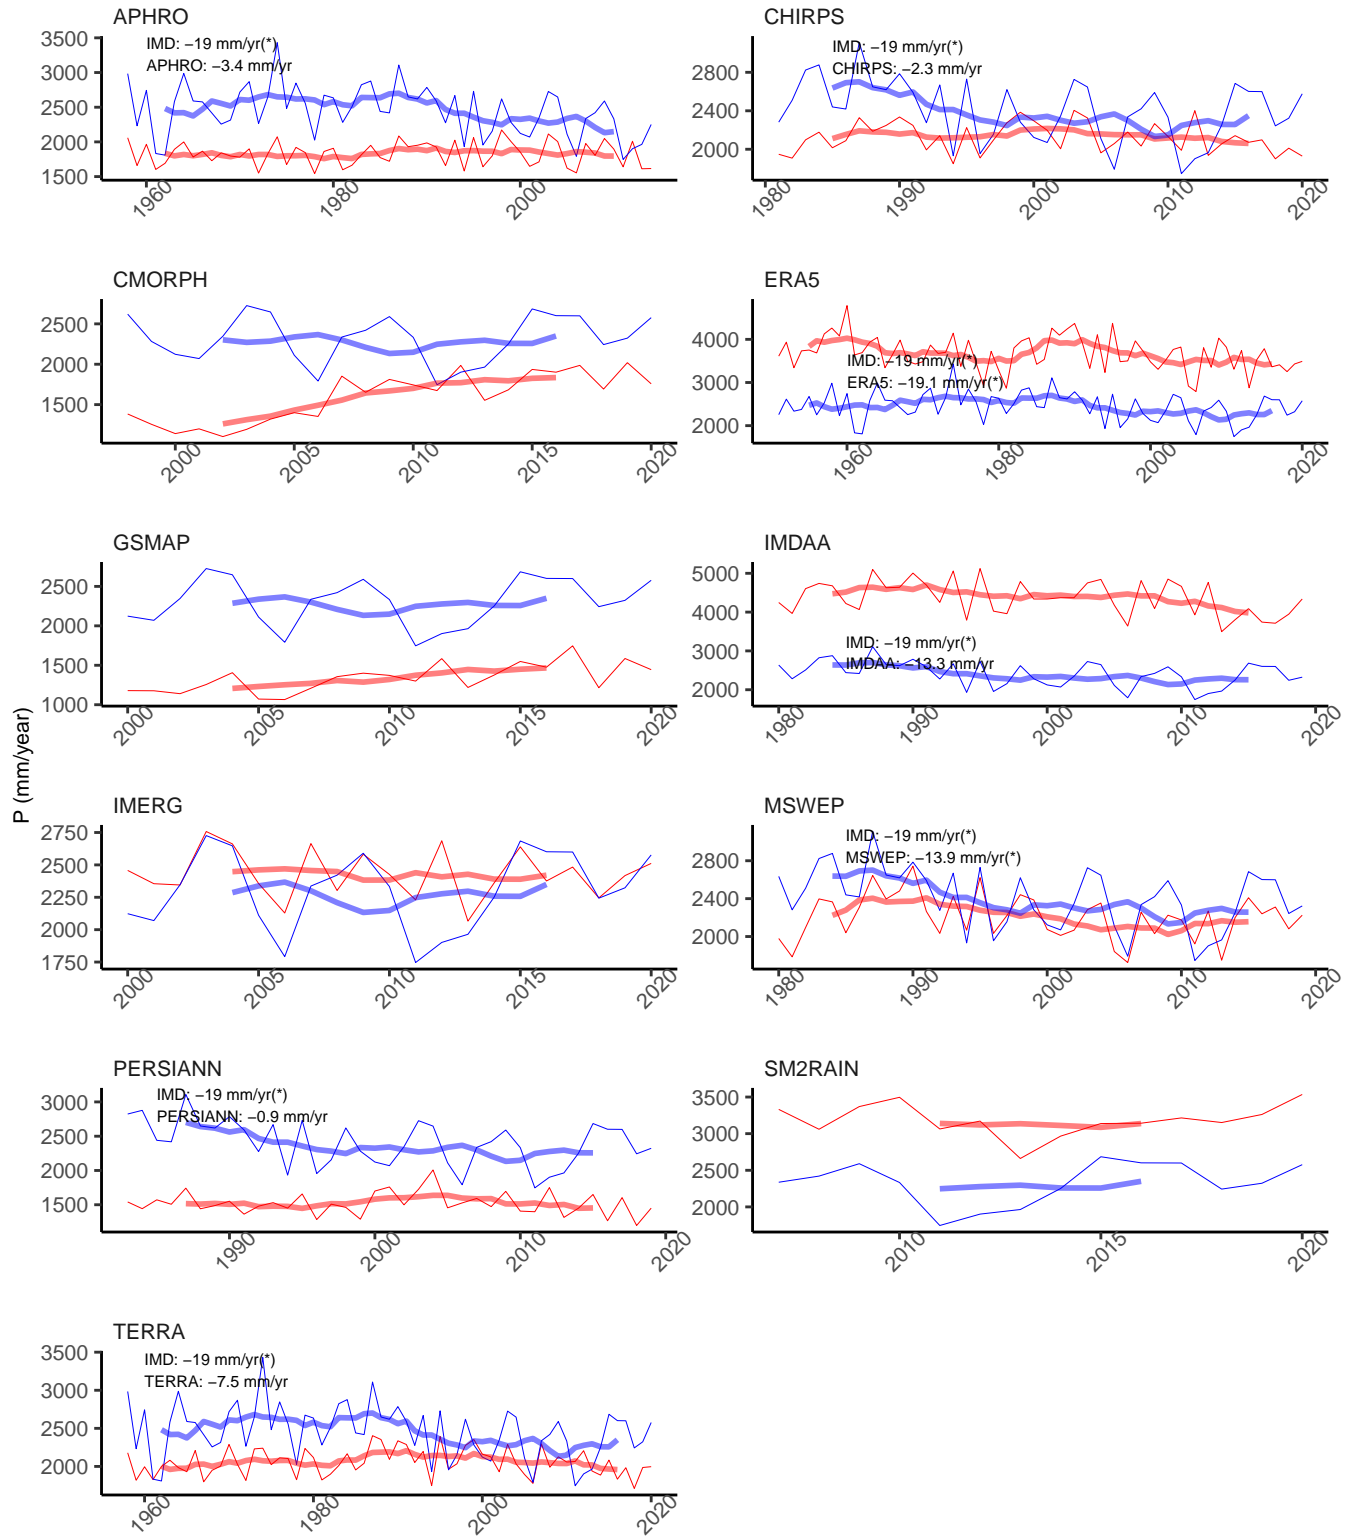

Figure S3.18: Same as Figure S3.16, except for the Brahmaputra Basin.

Ganga, basin-averaged WY-based annual precipitation (mm/year)

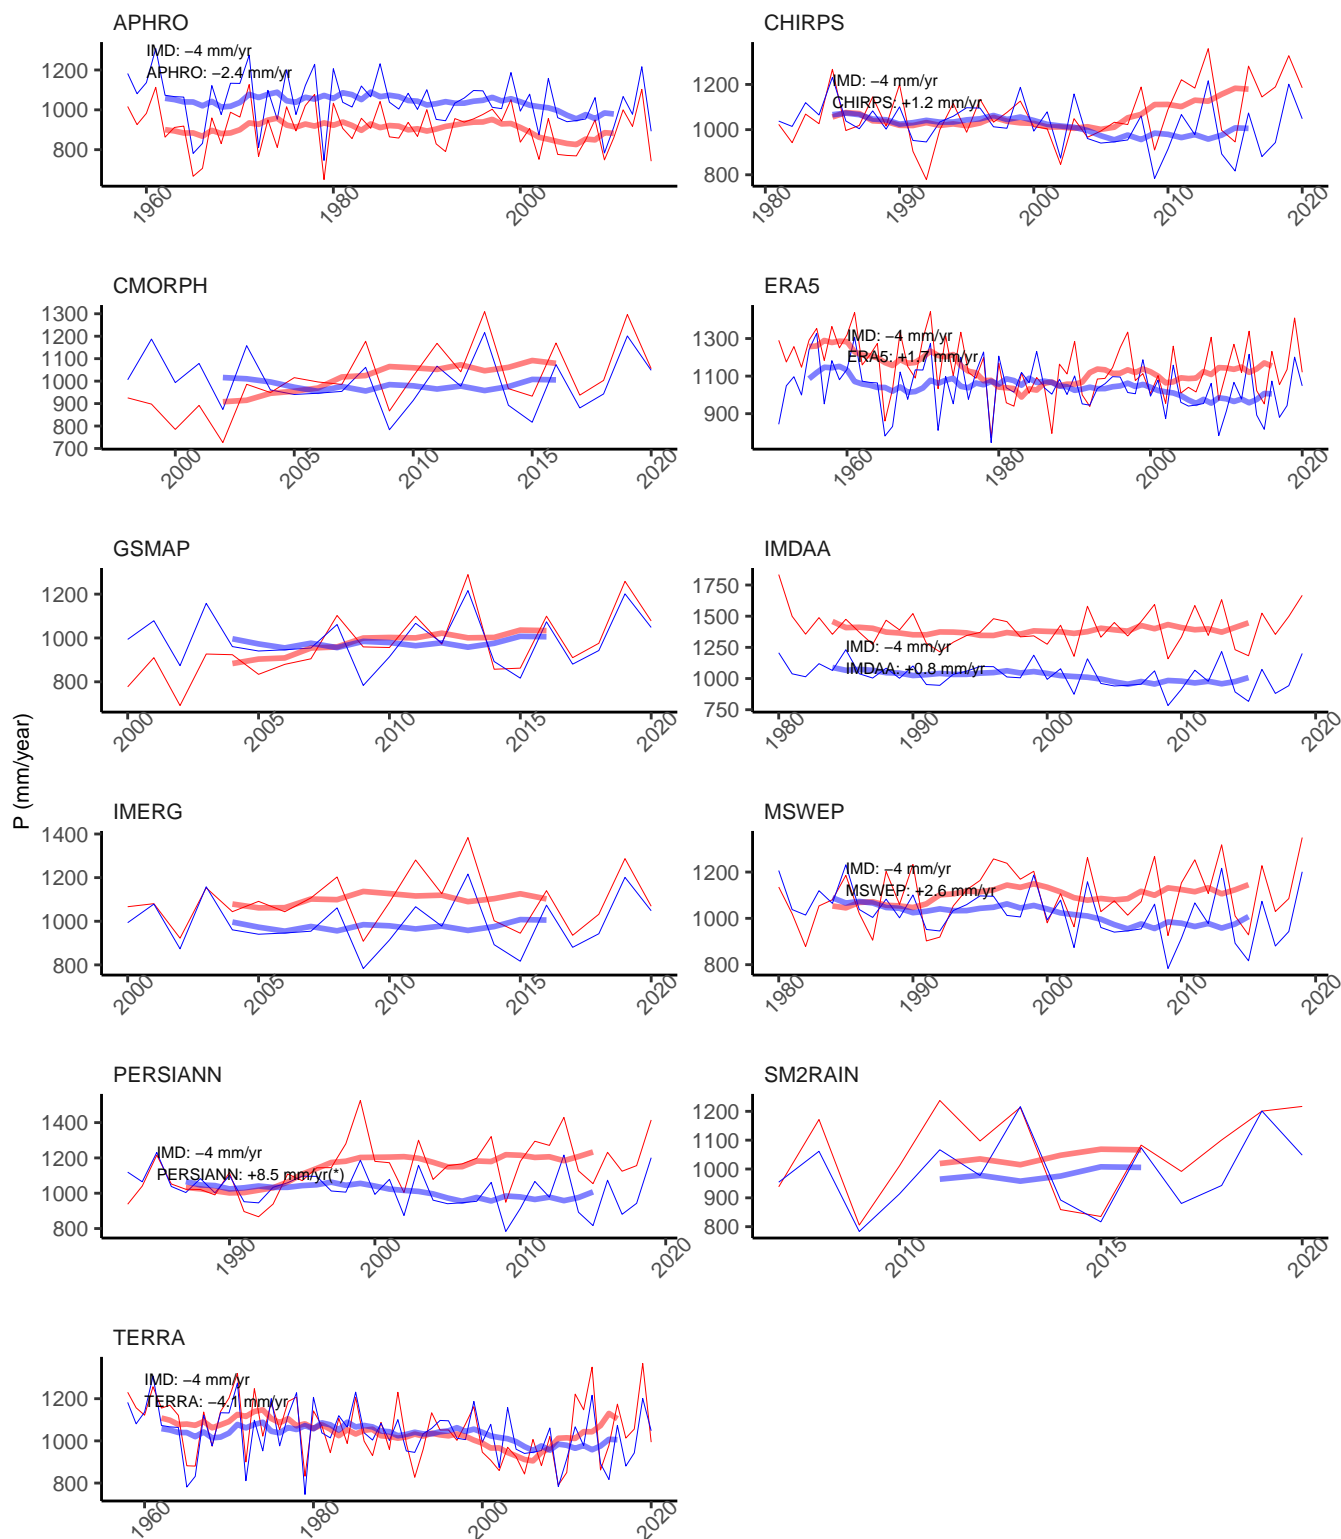

Figure S3.19: Same as Figure S3.16, except for the Ganga Basin.

Indus, basin-averaged WY-based annual precipitation (mm/year)

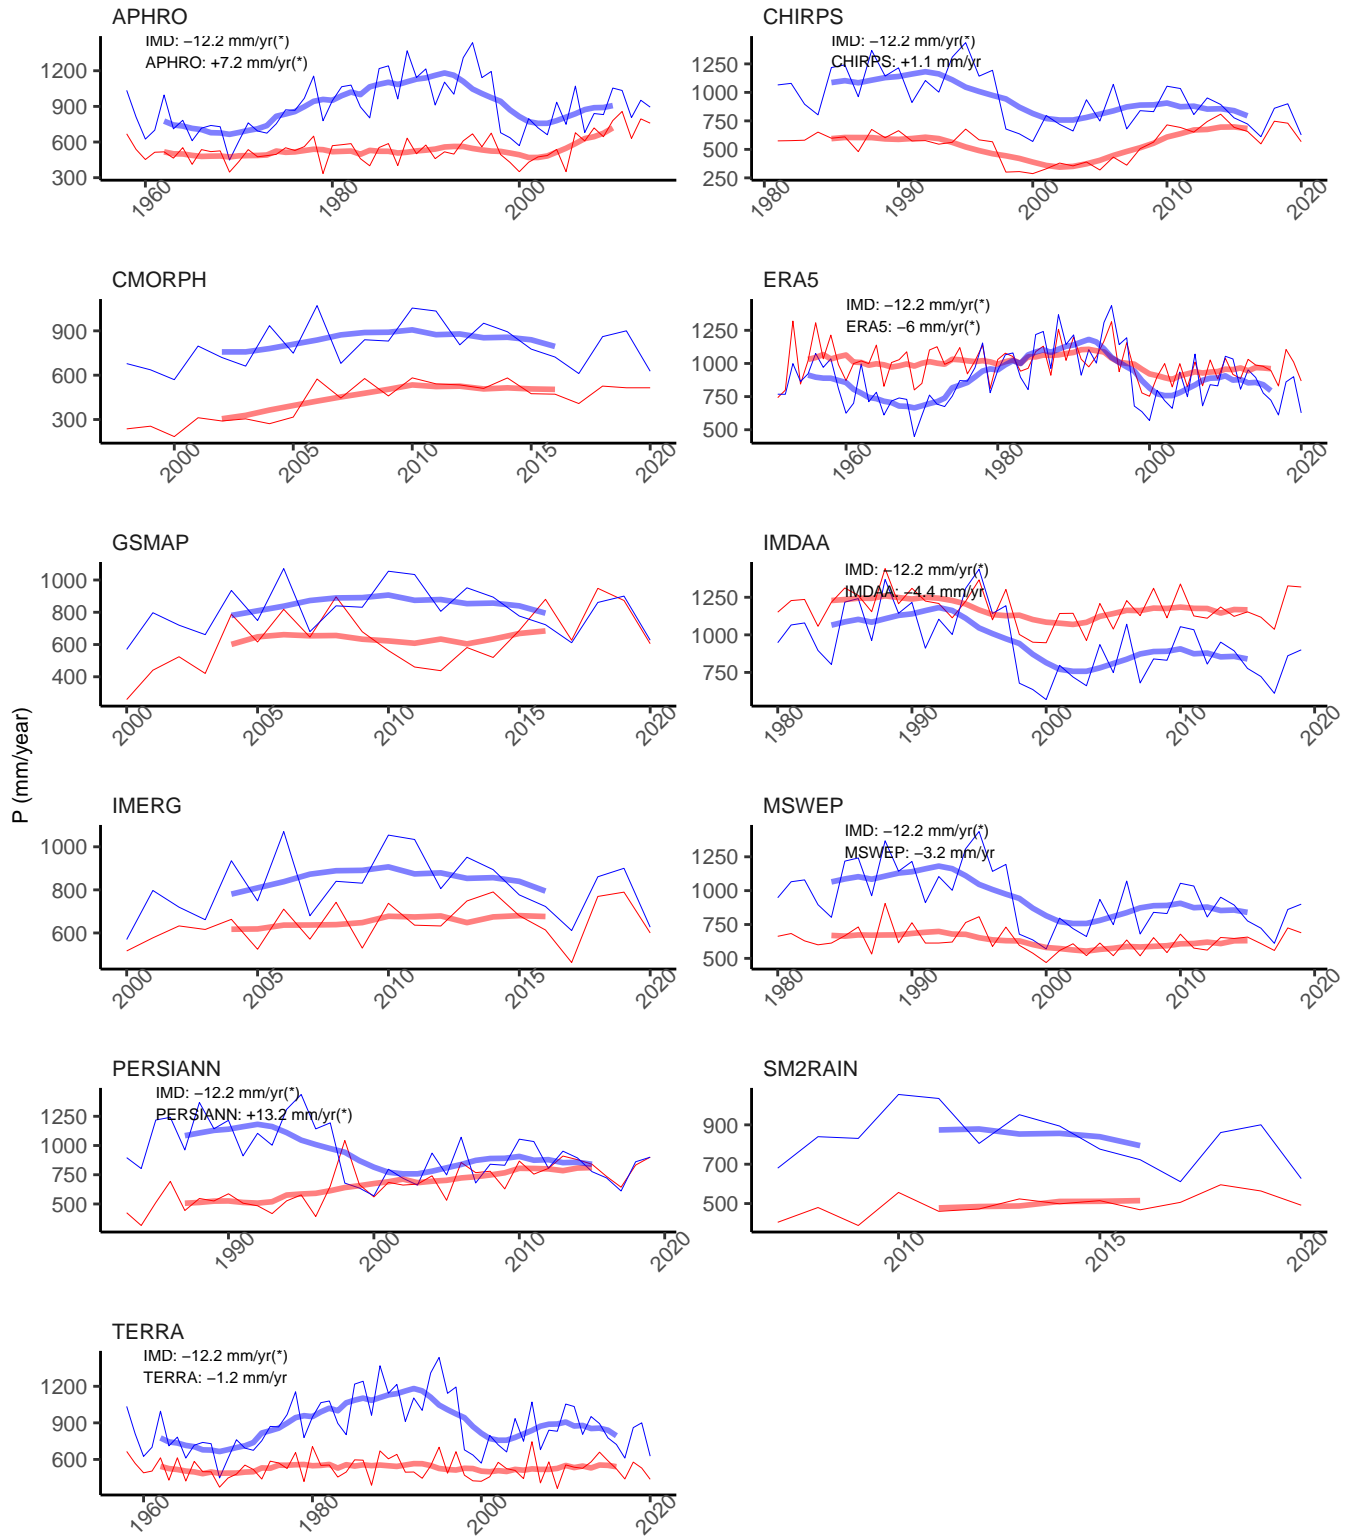

Figure S3.20: Same as Figure S3.16, except for the Indus Basin.

Minor, basin-averaged WY-based annual precipitation (mm/year)

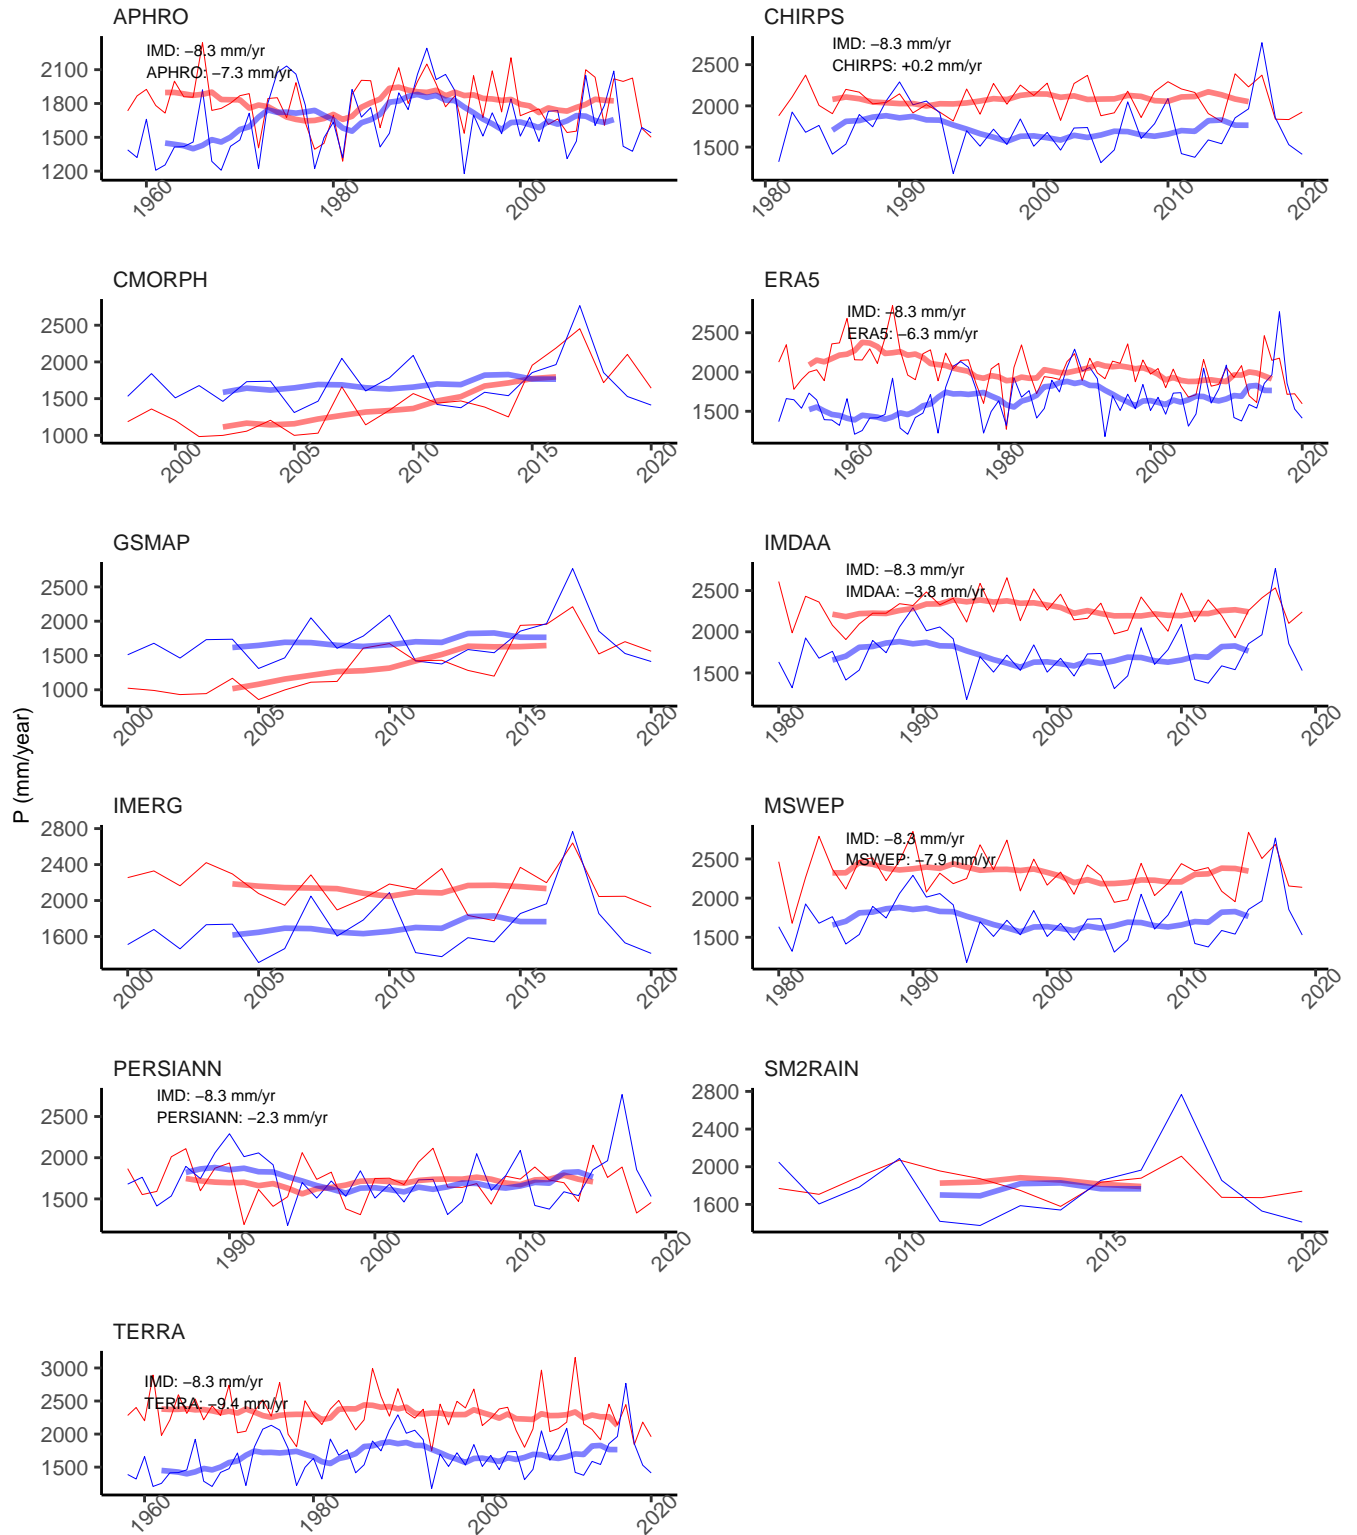

Figure S3.21: Same as Figure S3.16, except for the Minor Basin.

### North Ladakh, basin-averaged WY-based annual precipitation (mm/year)

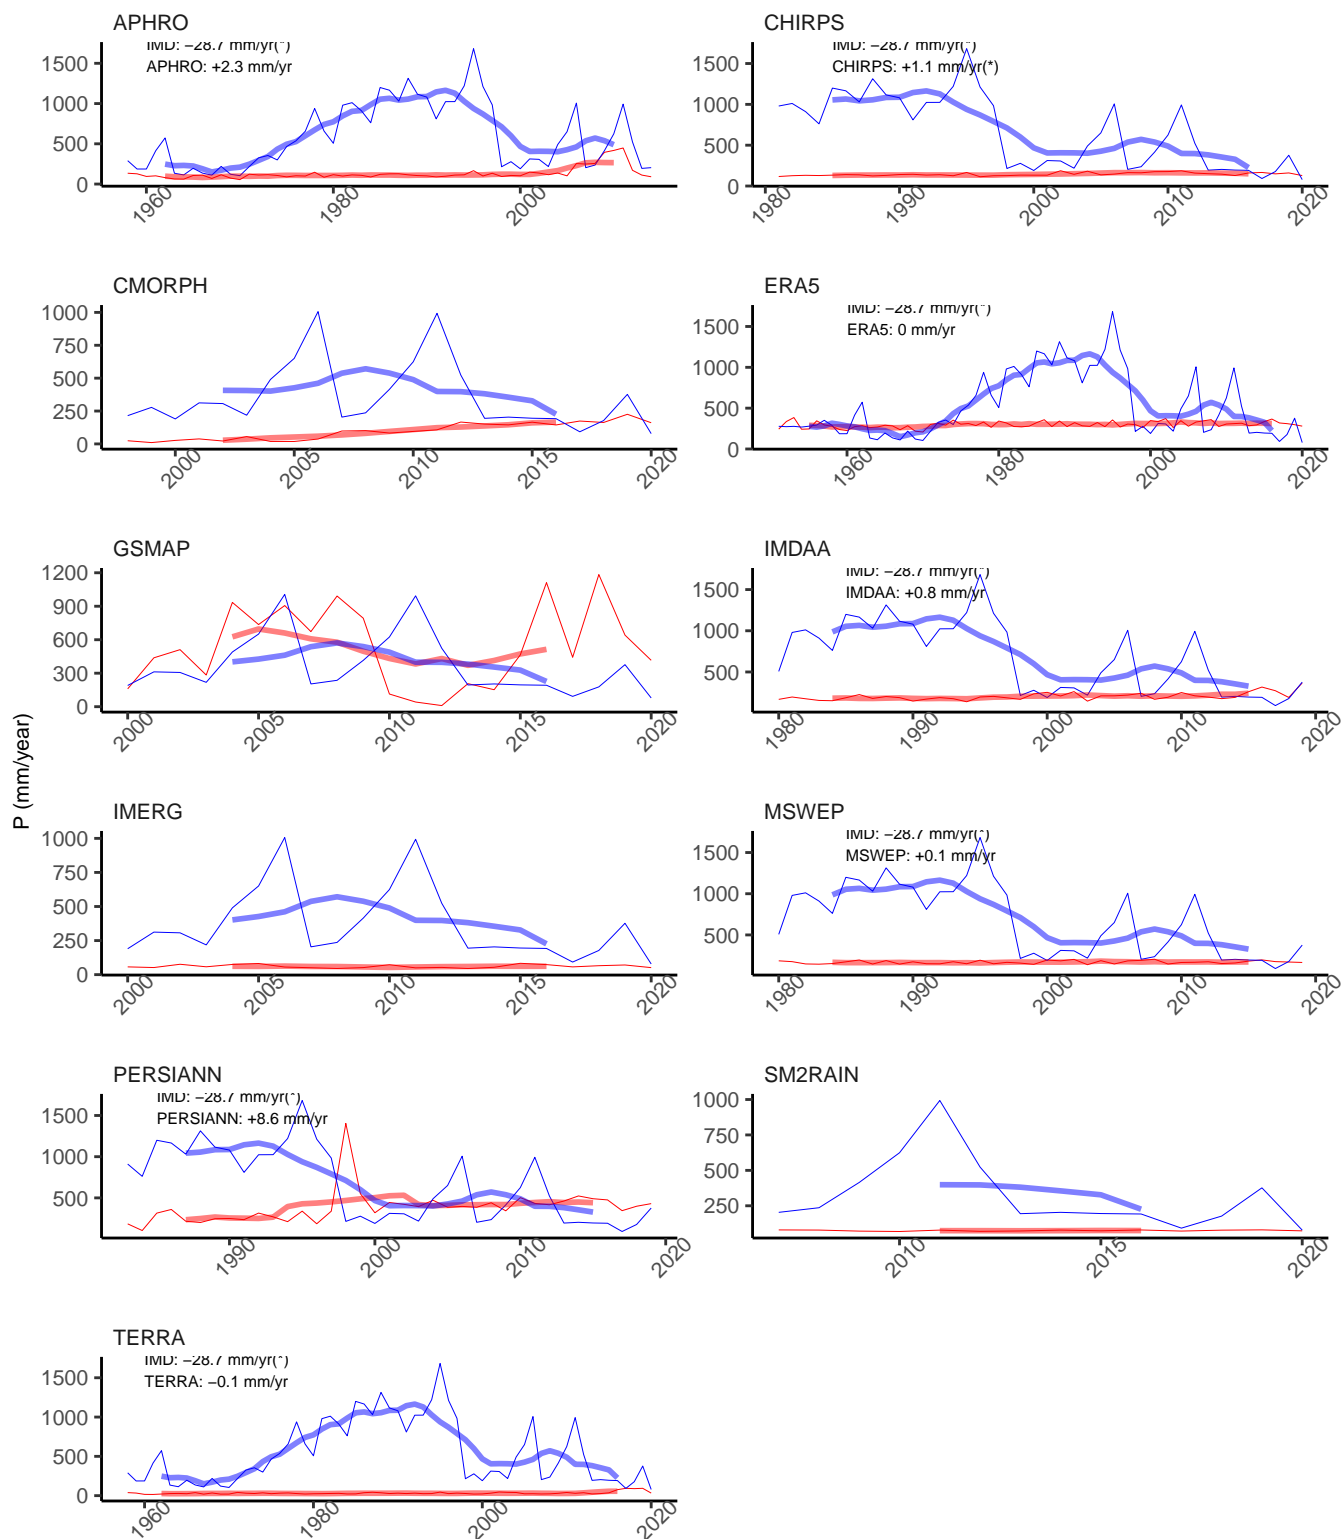

Figure S3.22: Same as Figure S3.16, except for the North Ladakh Basin.



WFR Kutch, basin-averaged WY-based annual precipitation (mm/year)

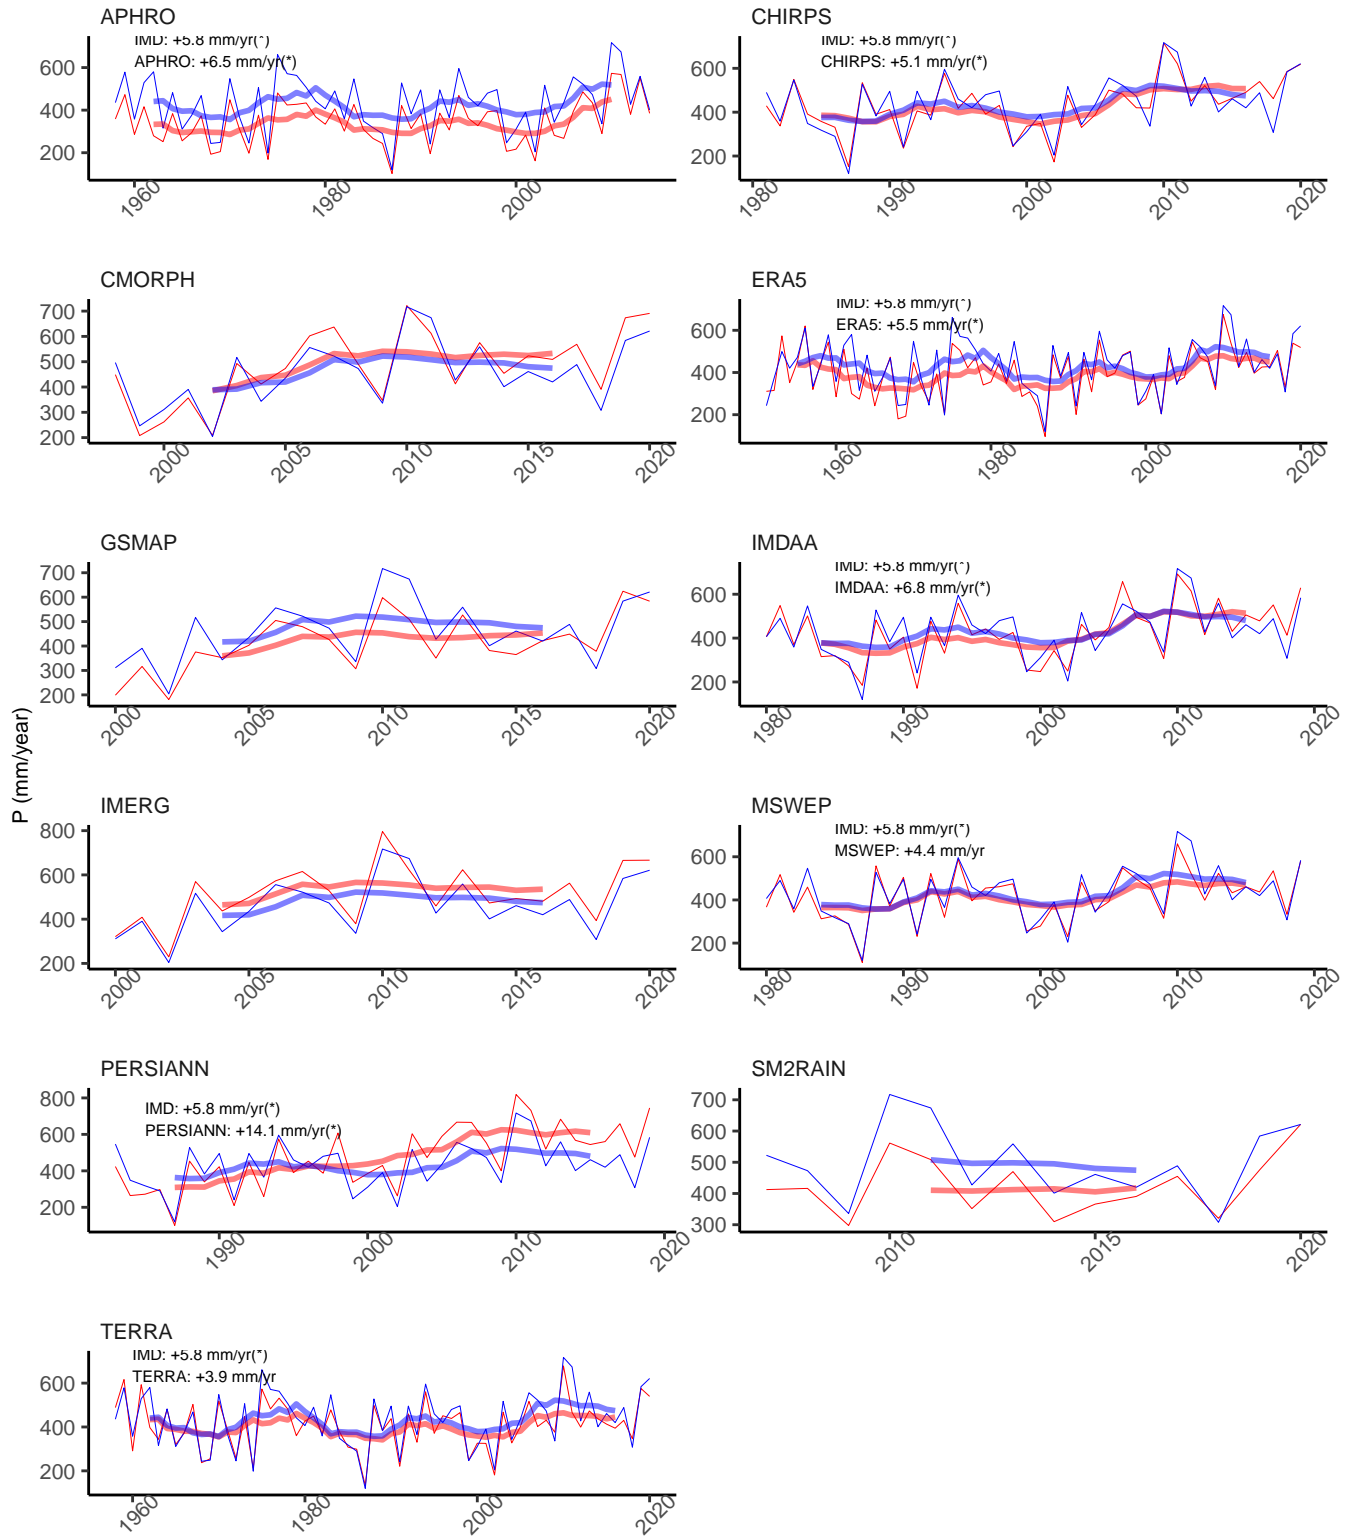

Figure S3.23: Same as Figure S3.16, except for the WFR Kutch Basin.

Brahmani–Baitarani, basin-averaged WY-based annual precipitation (mm/year)

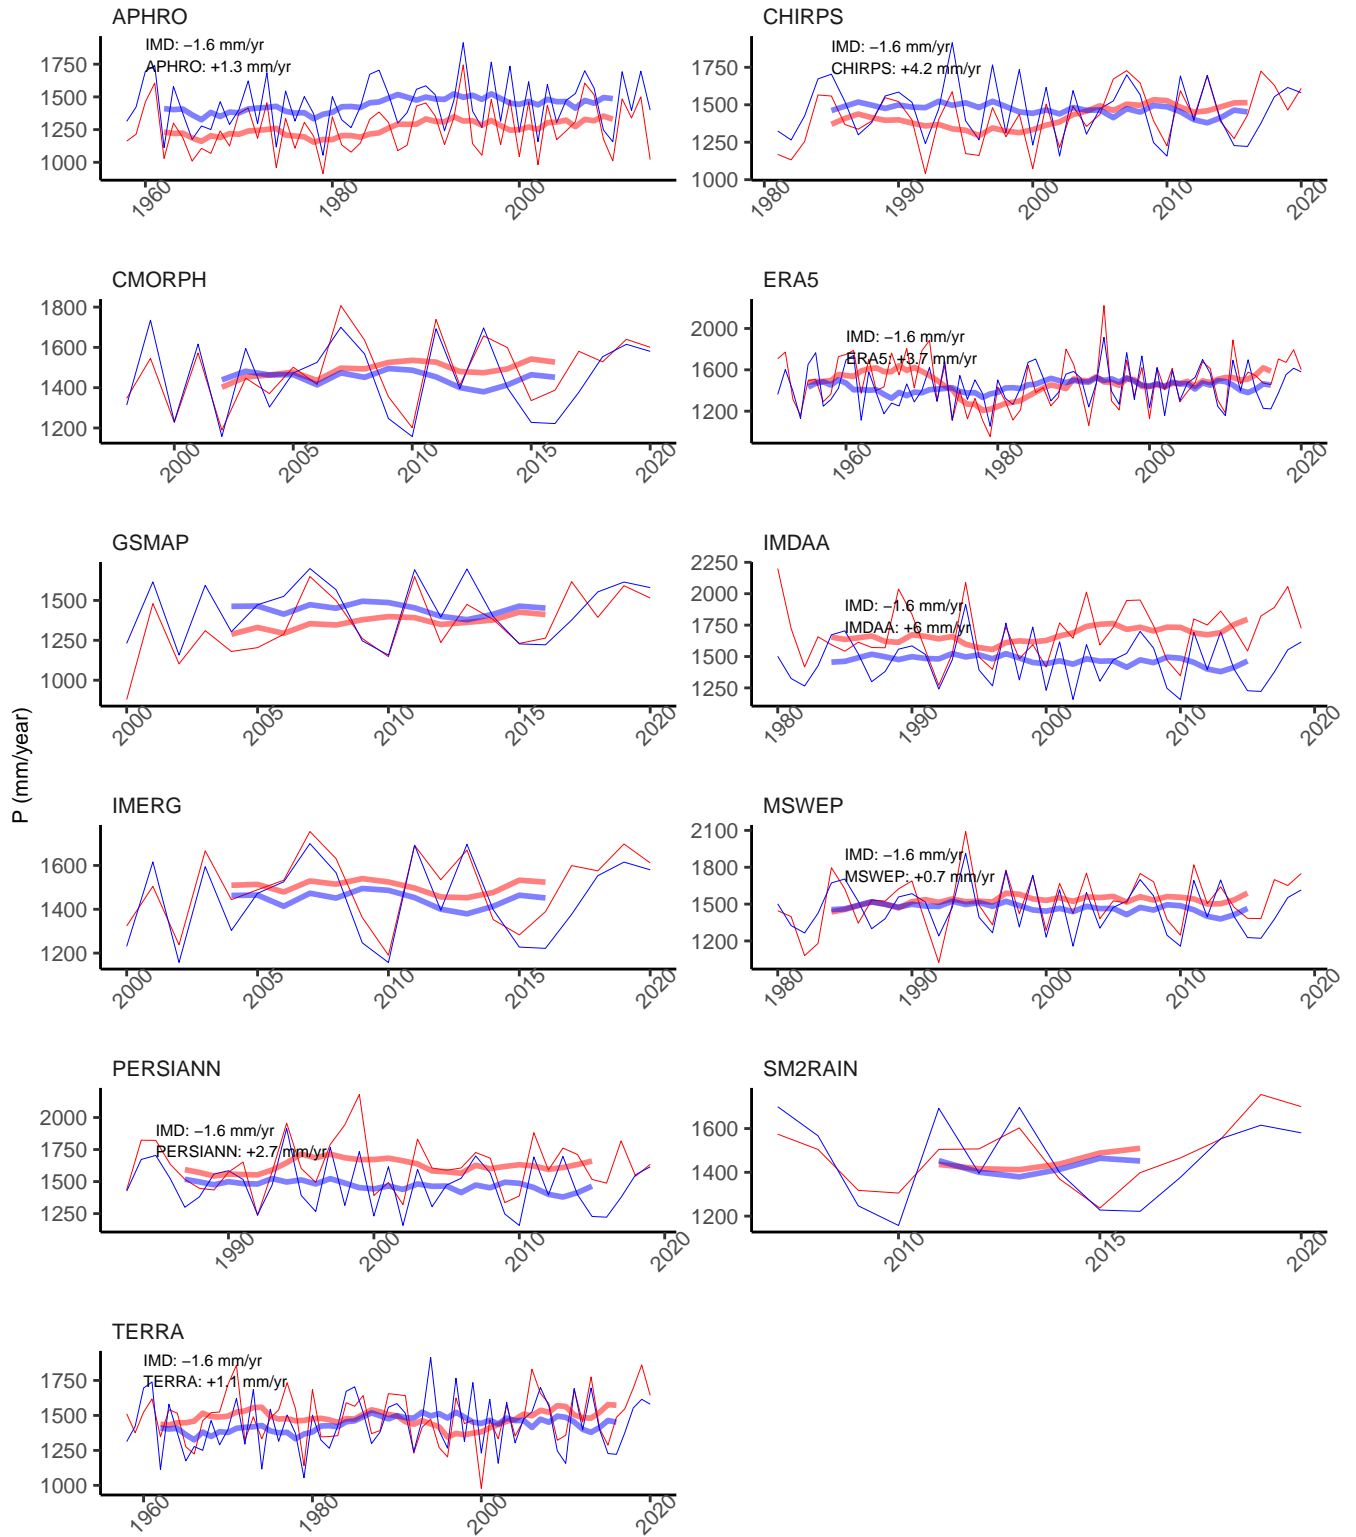

Figure S3.24: Same as Figure S3.16, except for the Brahmani-Baitarani Basin.

Cauvery, basin-averaged WY-based annual precipitation (mm/year)

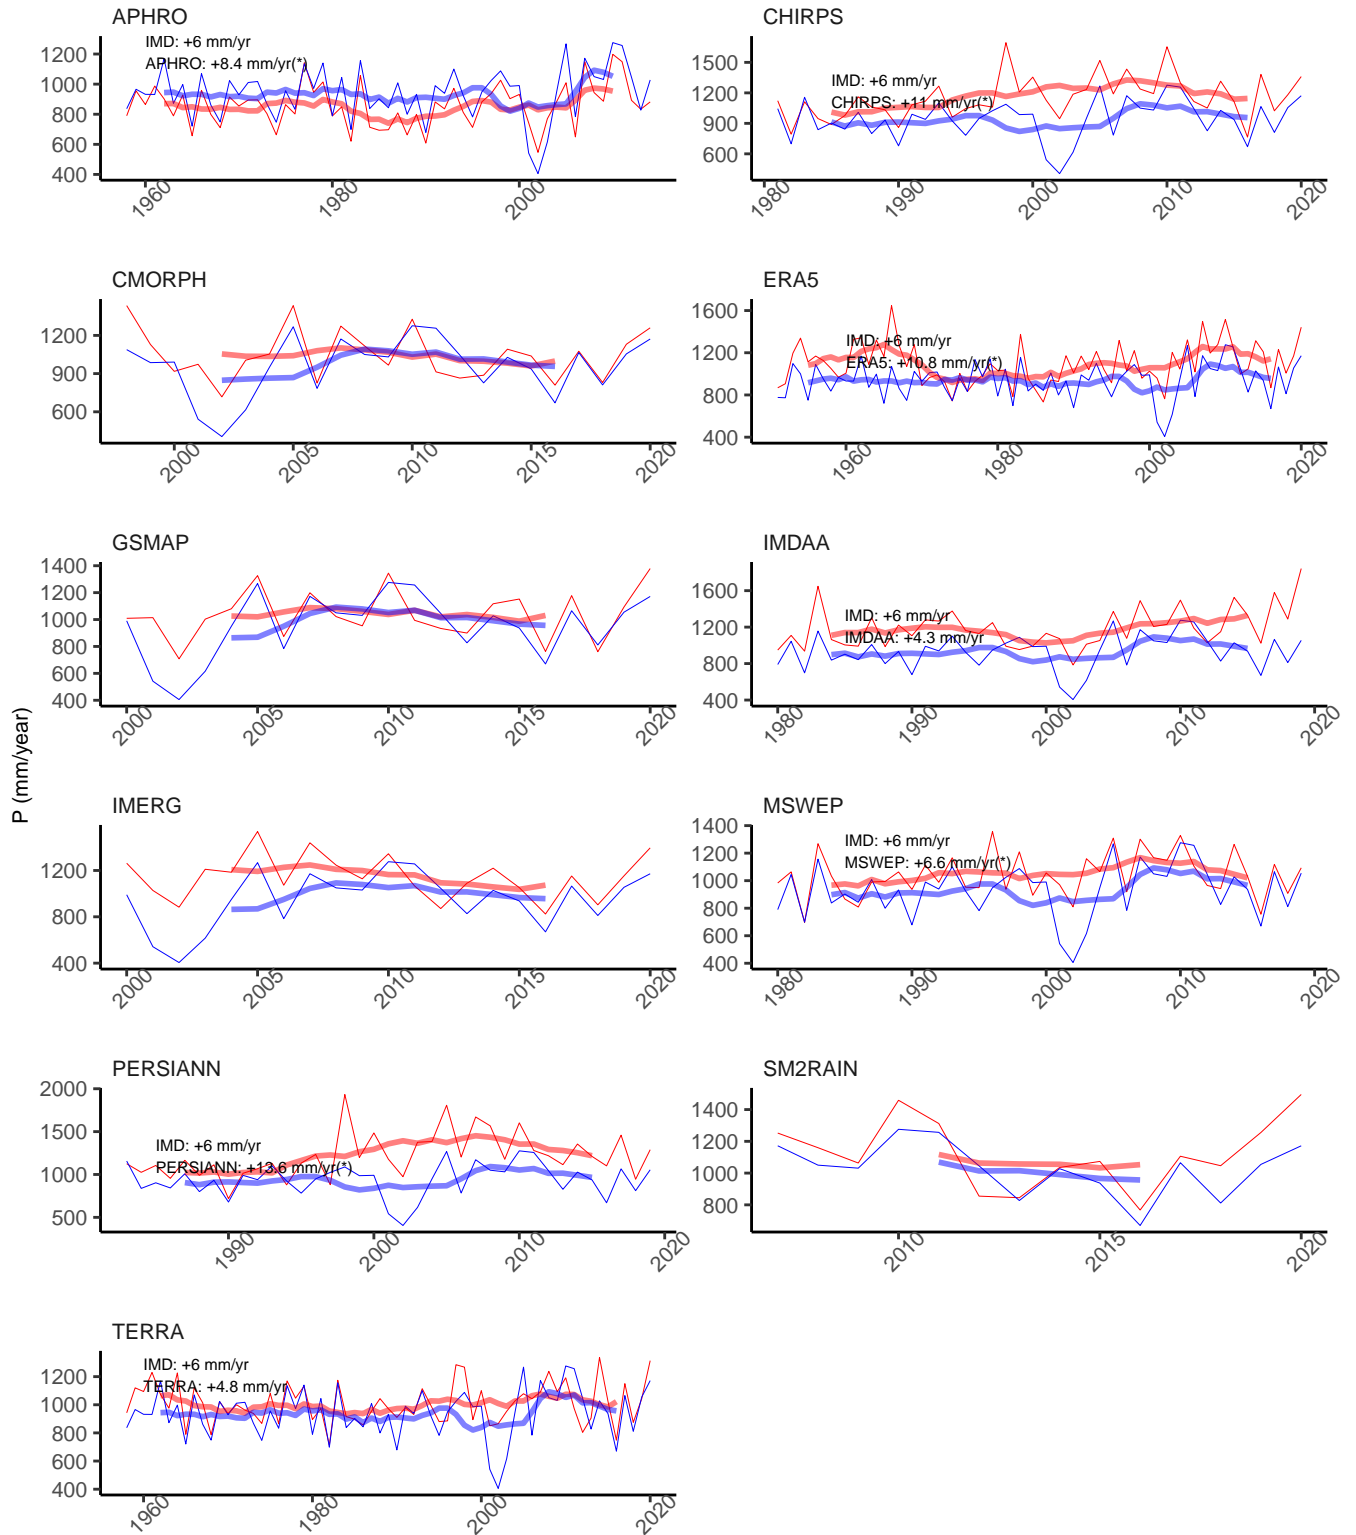

Figure S3.25: Same as Figure S3.16, except for the Cauvery Basin.

EFR North, basin-averaged WY-based annual precipitation (mm/year)

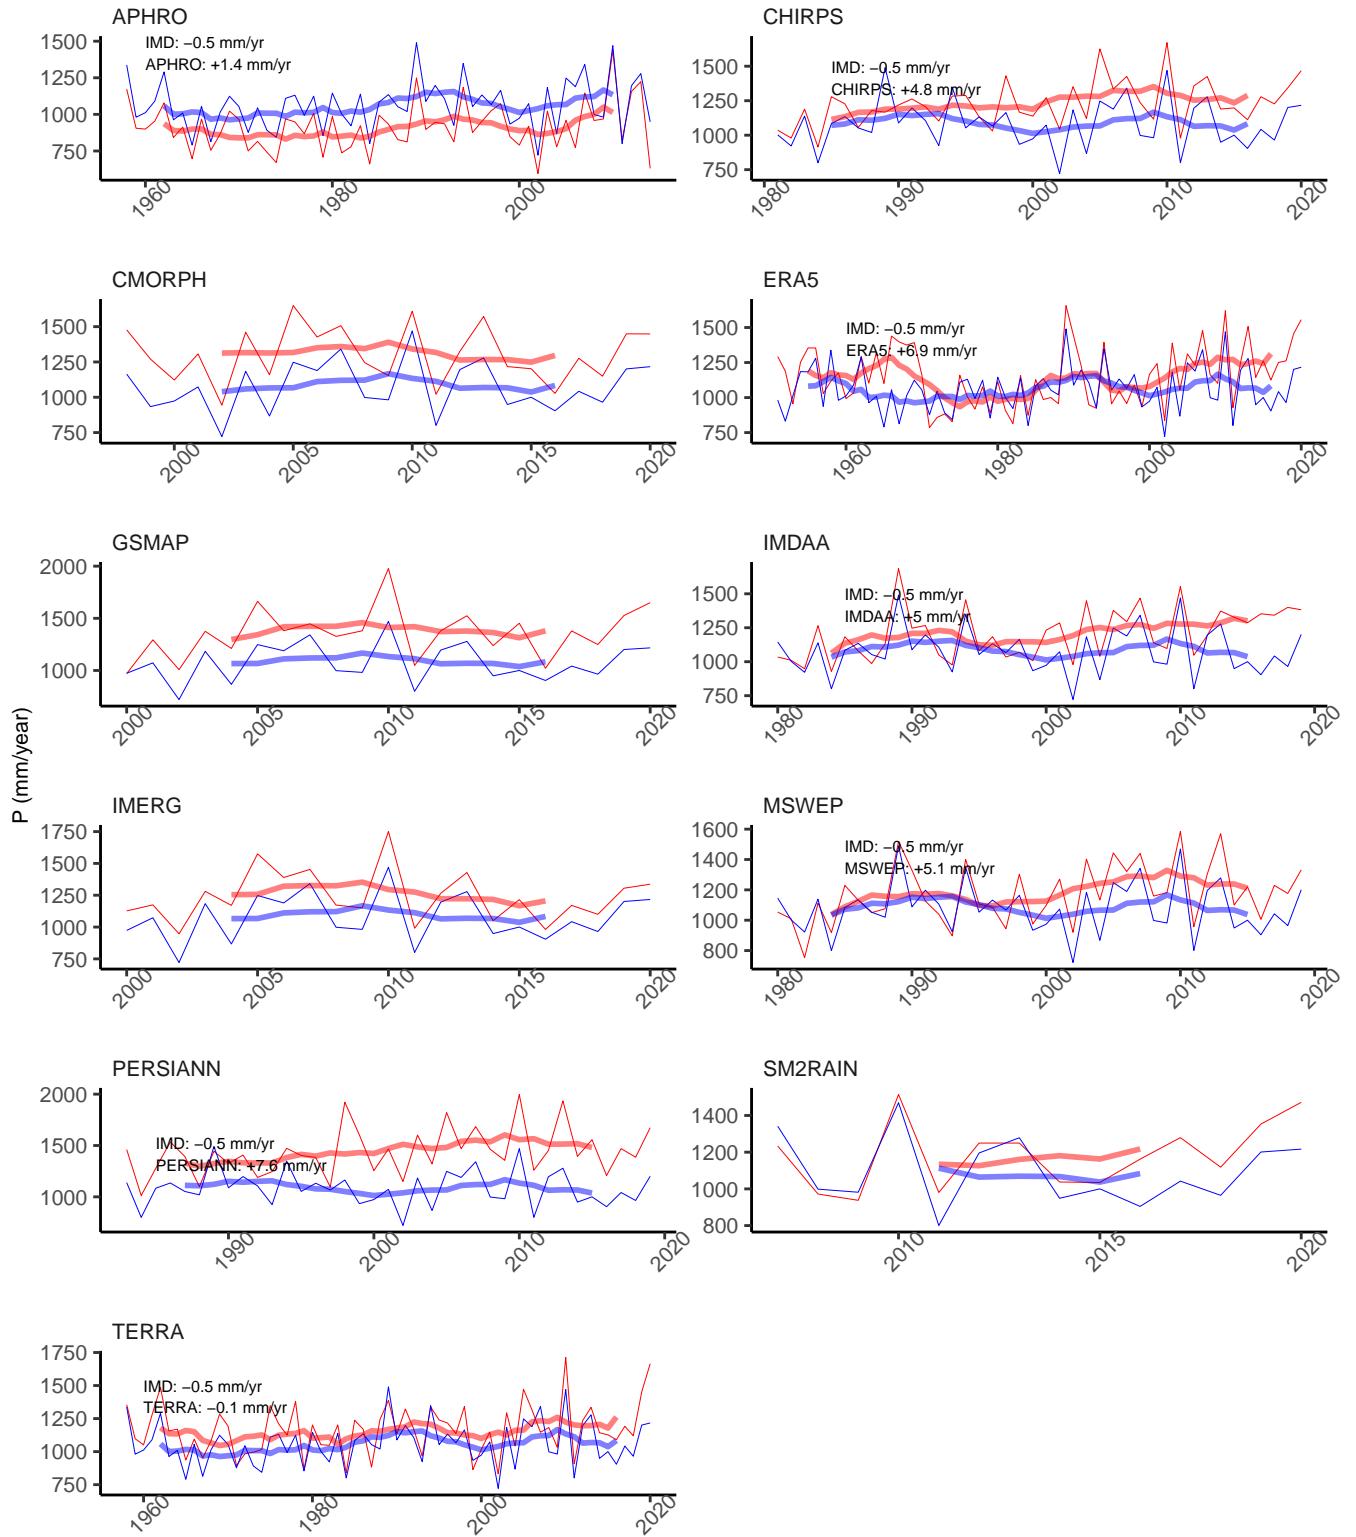

Figure S3.26: Same as Figure S3.16, except for the EFR North Basin.

EFR South, basin-averaged WY-based annual precipitation (mm/year)

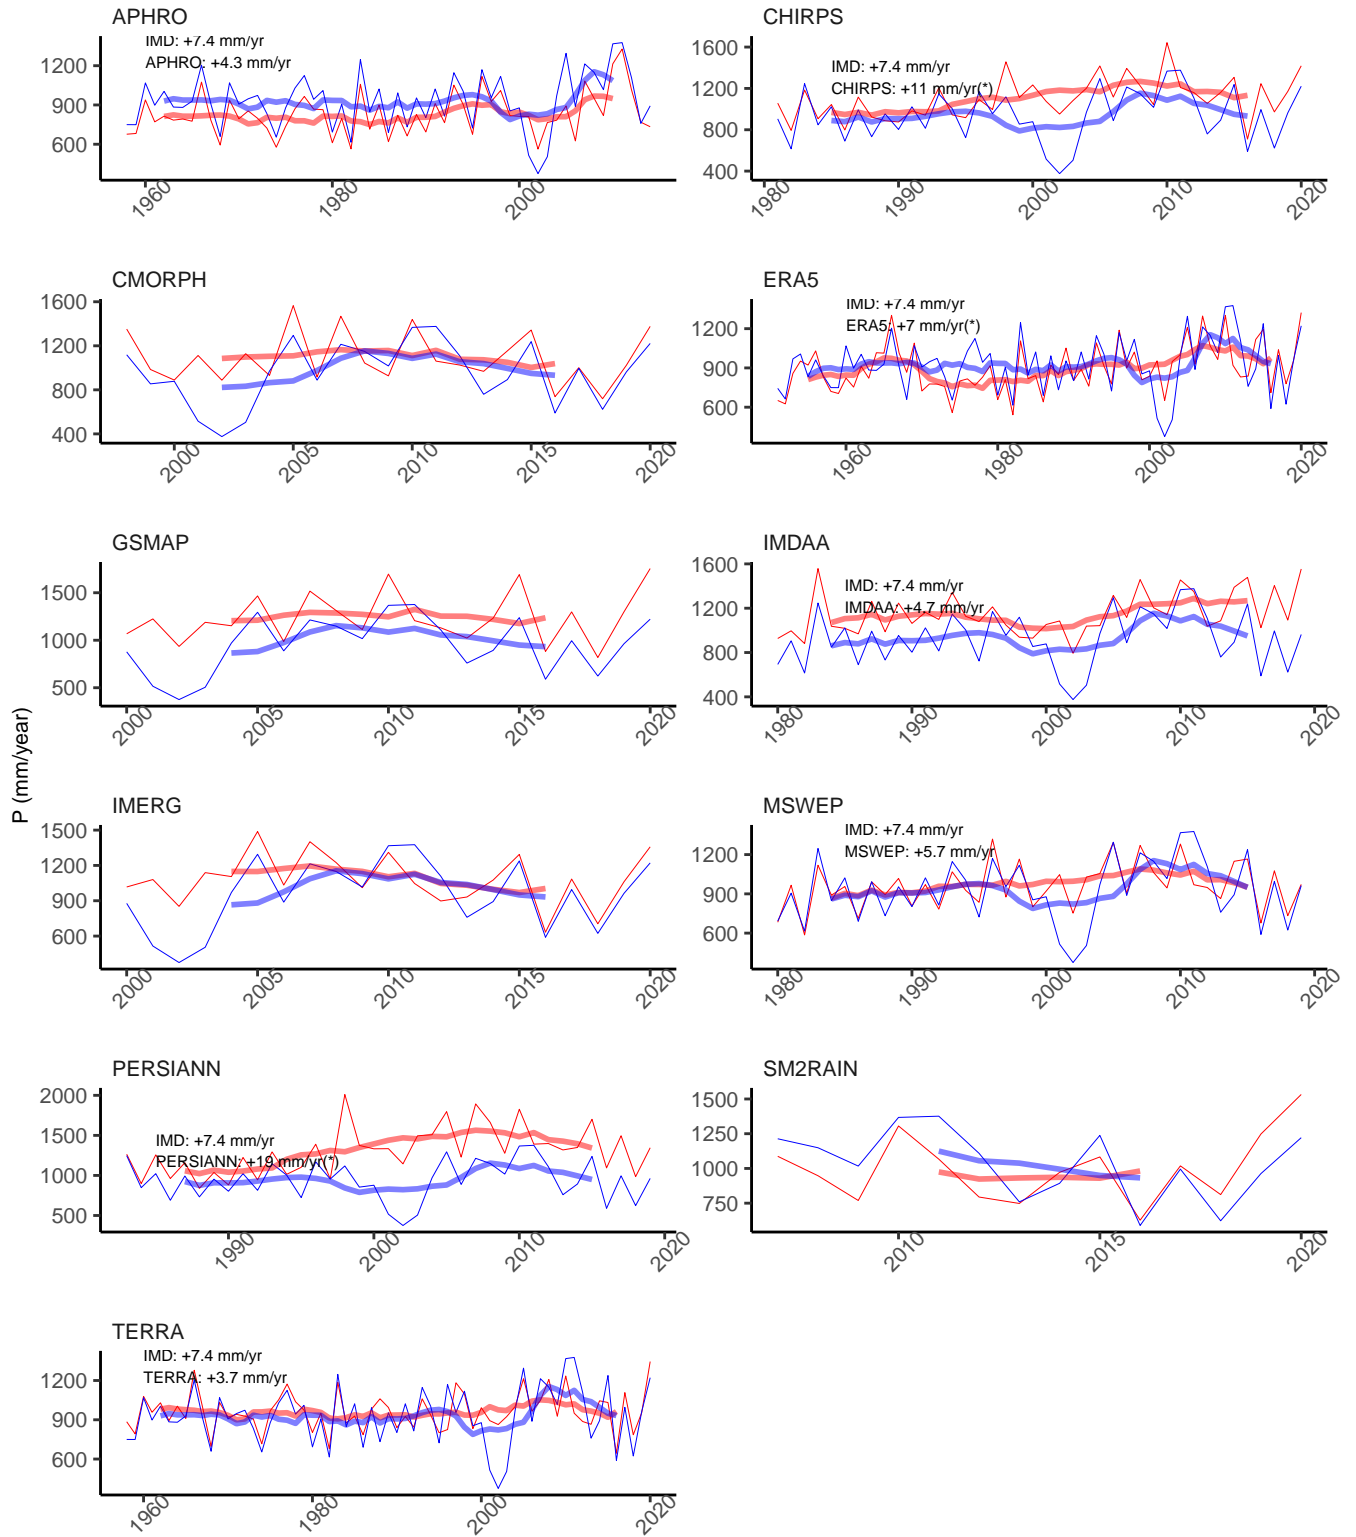

Figure S3.27: Same as Figure S3.16, except for the EFR South Basin.

Godavari, basin-averaged WY-based annual precipitation (mm/year)

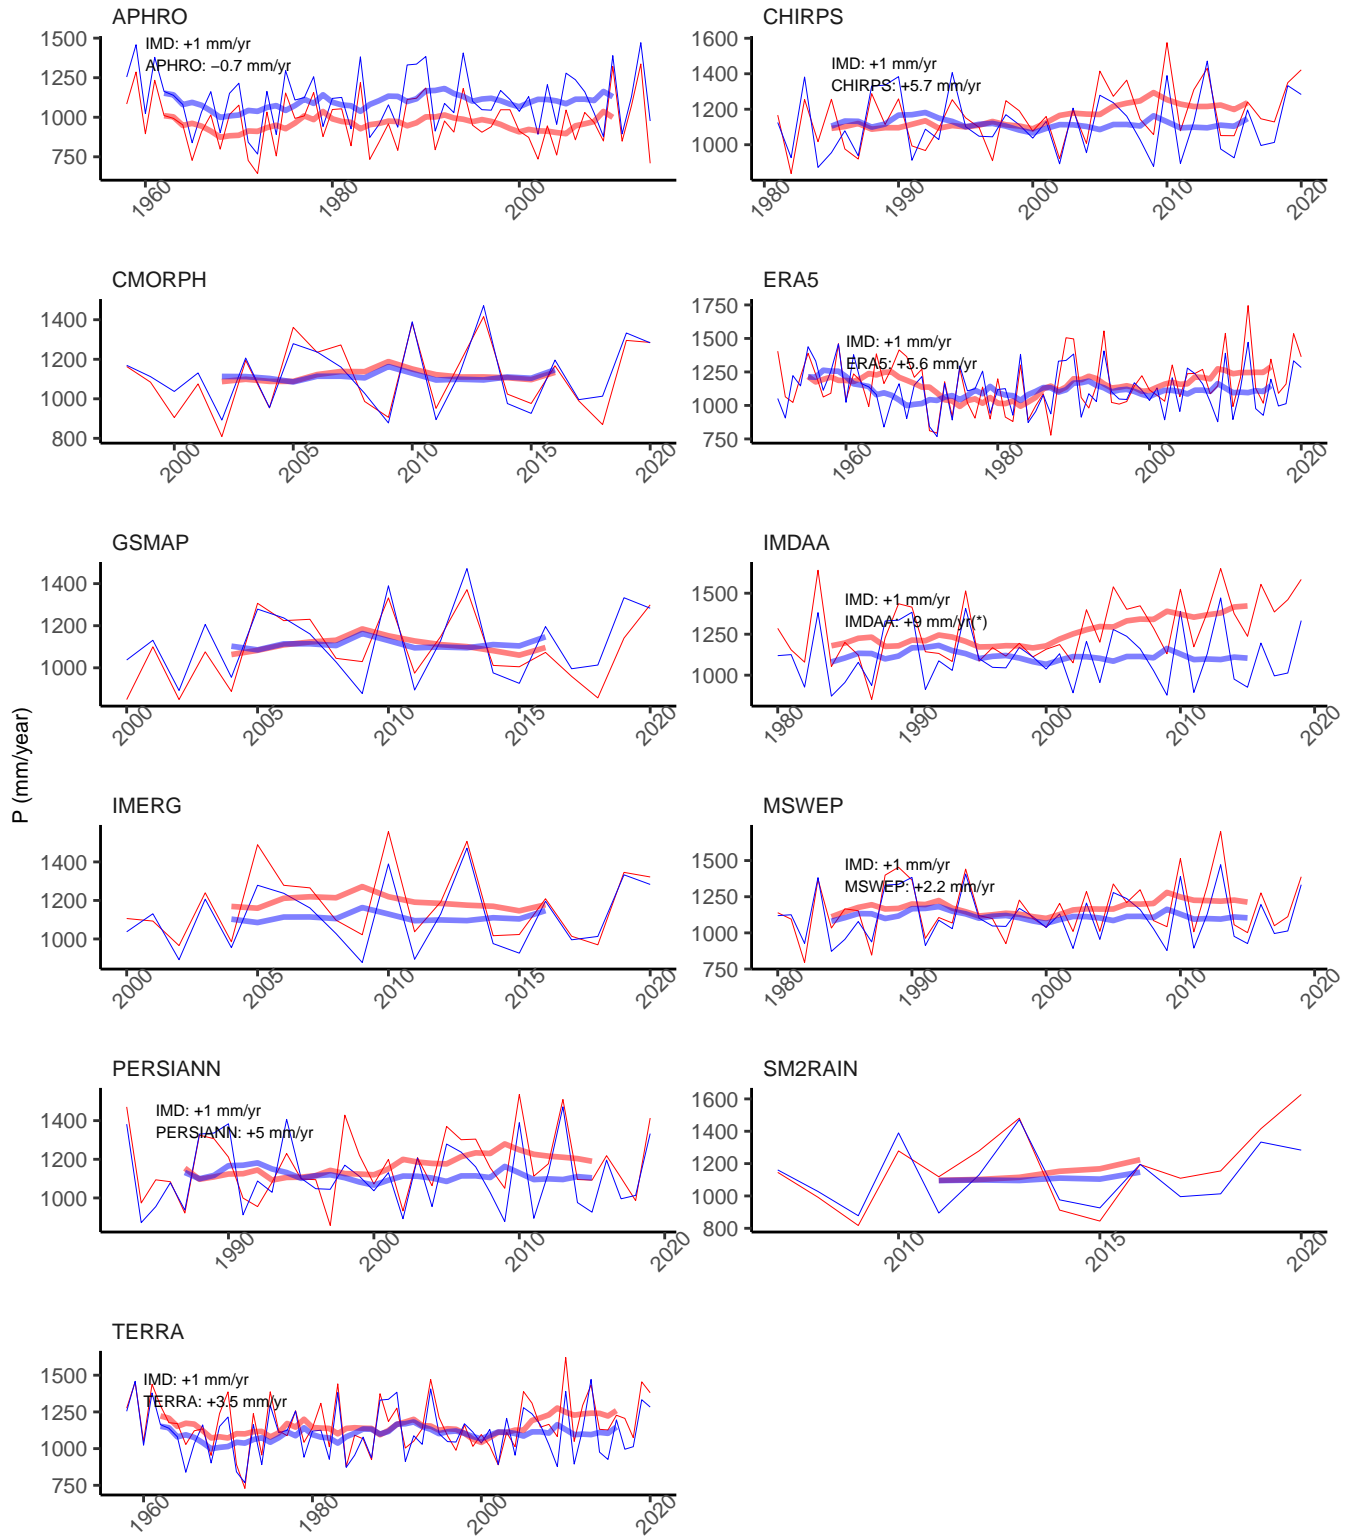

Figure S3.28: Same as Figure S3.16, except for the Godavari Basin.

Krishna, basin-averaged WY-based annual precipitation (mm/year)

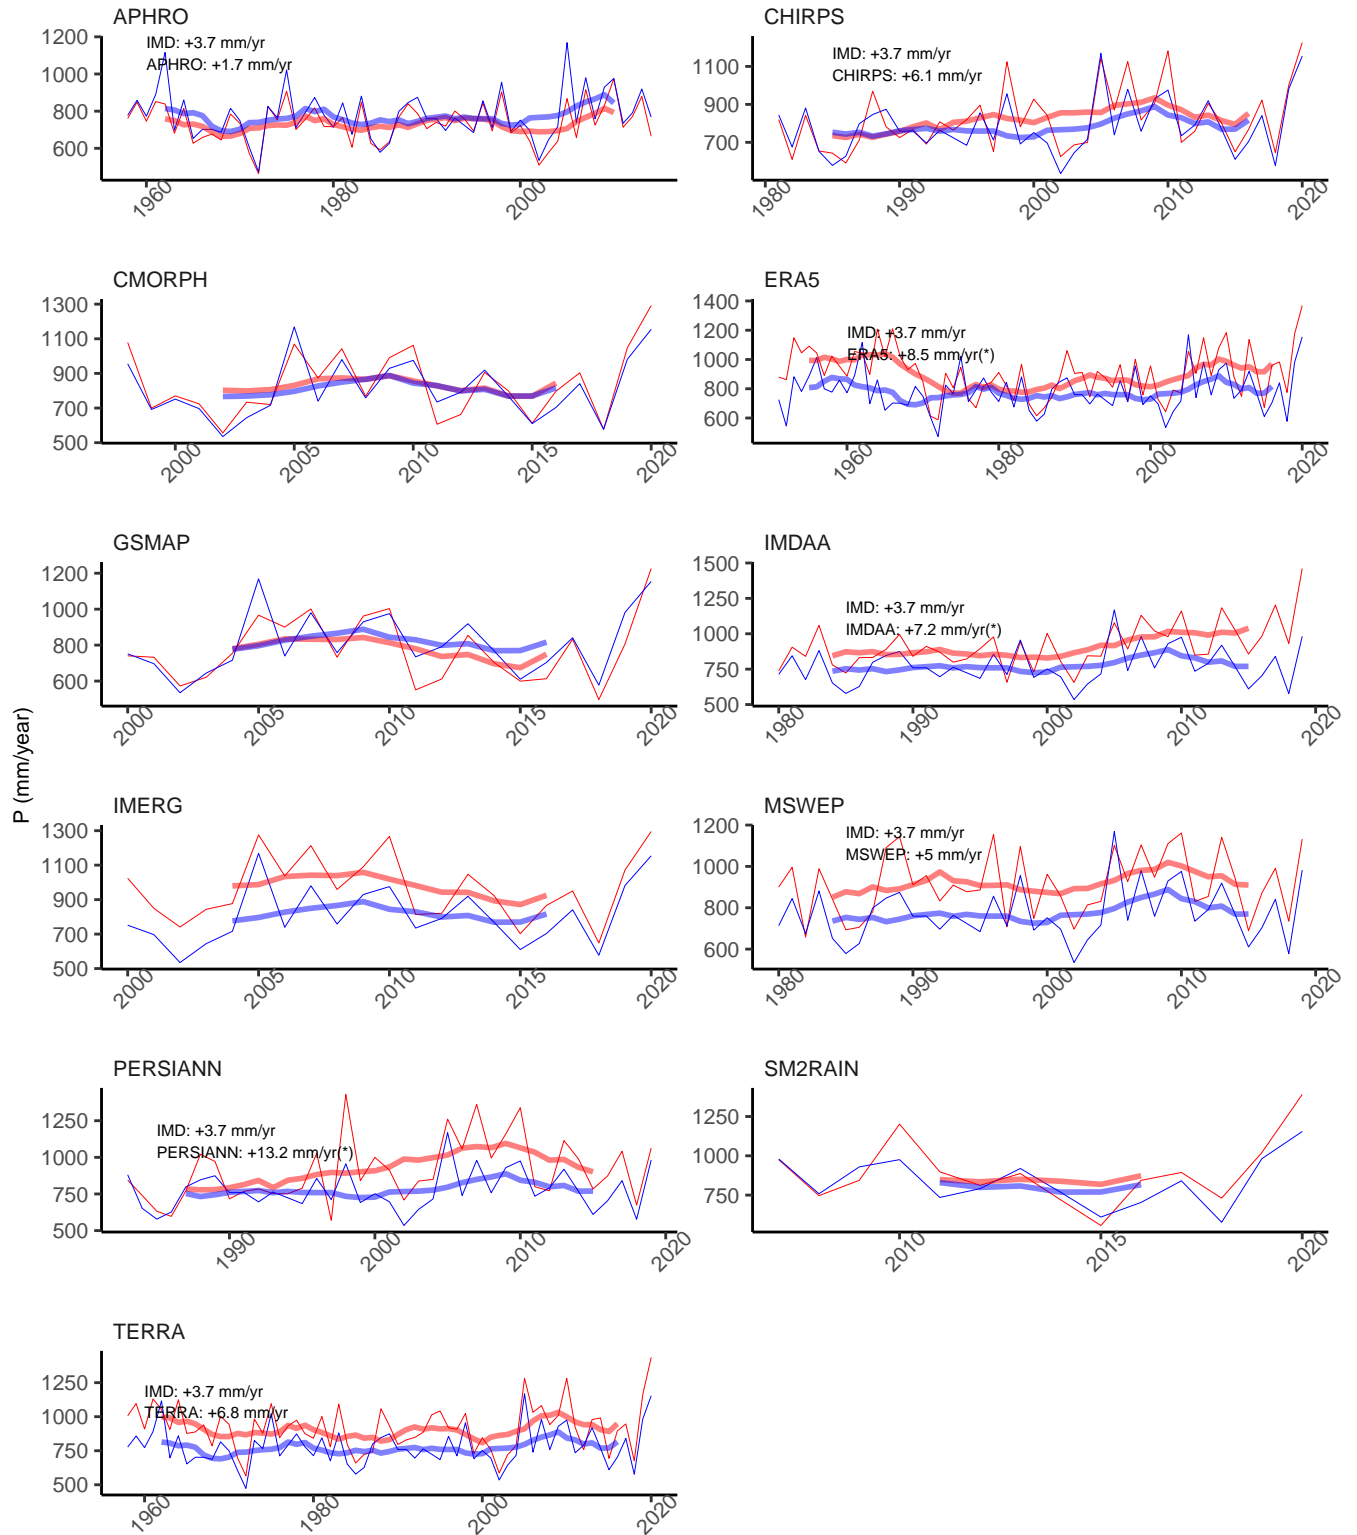

Figure S3.29: Same as Figure S3.16, except for the Krishna Basin.

Mahanadi, basin-averaged WY-based annual precipitation (mm/year)

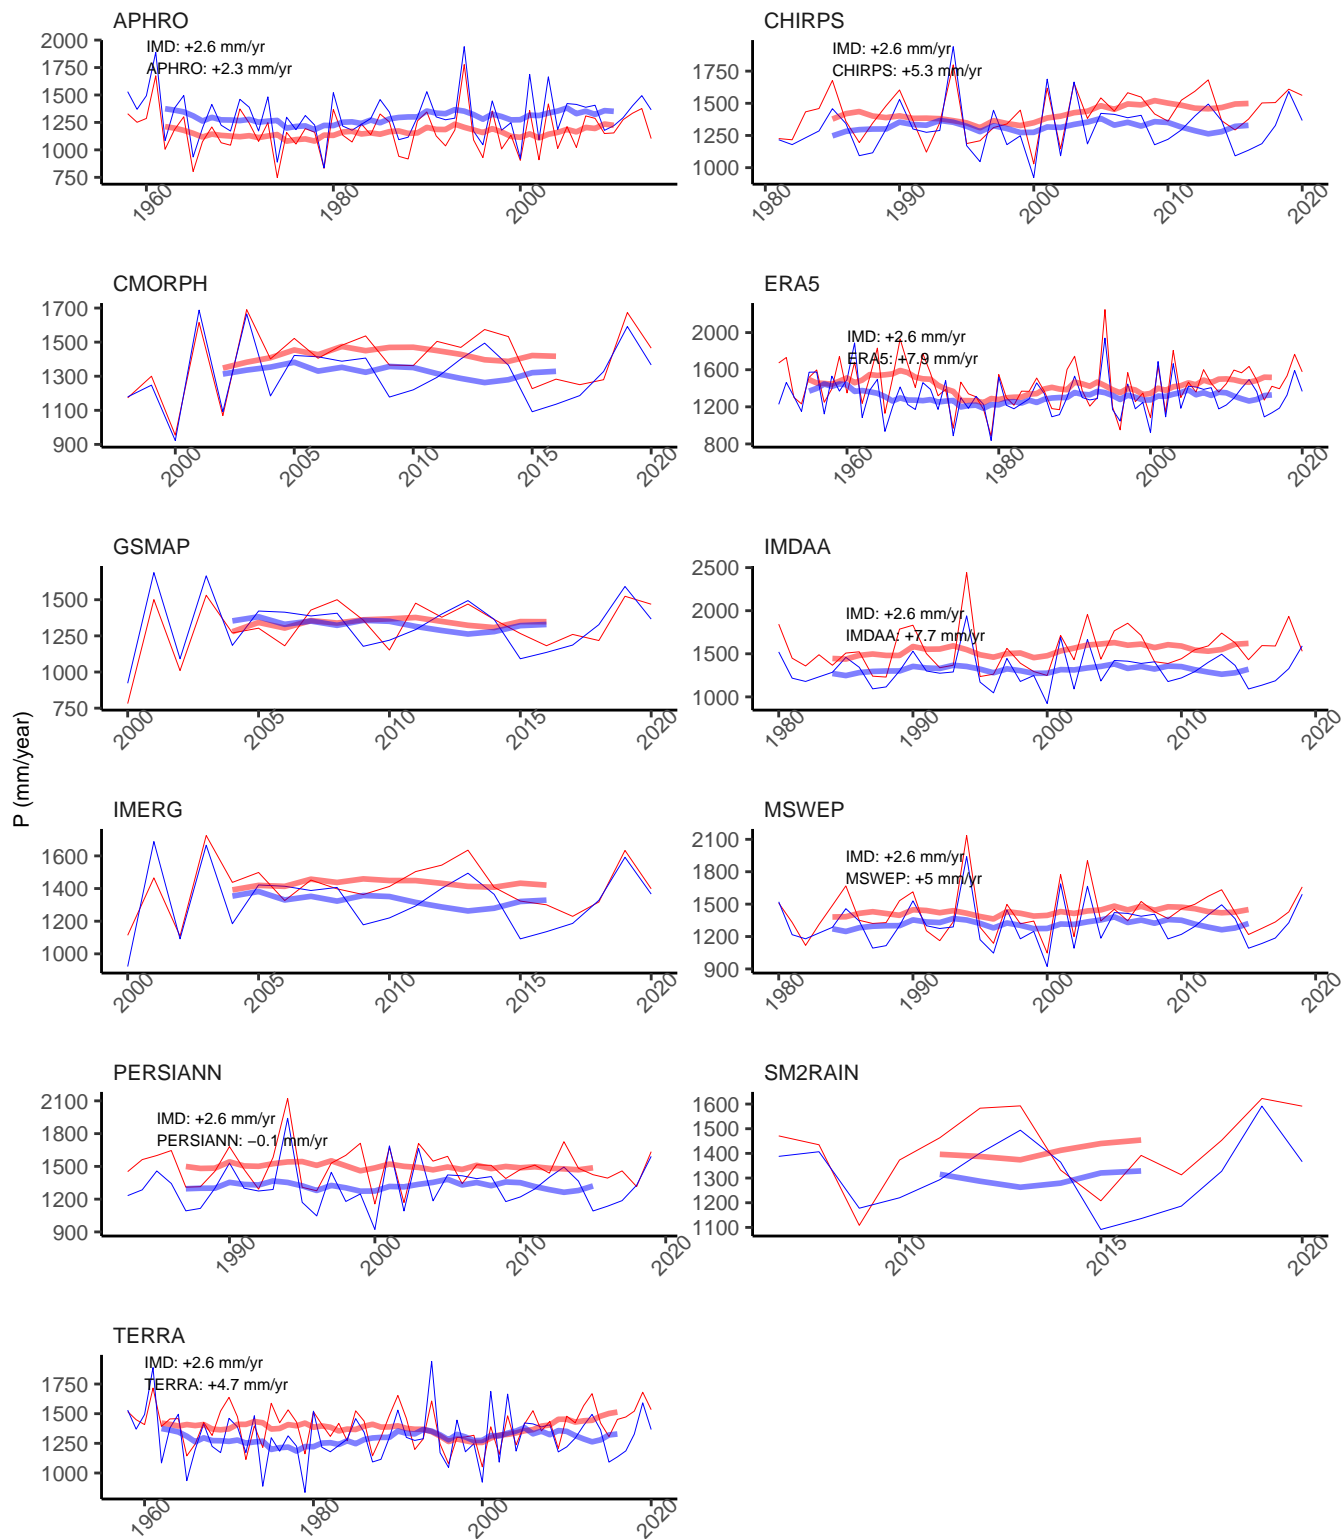

Figure S3.30: Same as Figure S3.16, except for the Mahanadi Basin.



Mahi, basin-averaged WY-based annual precipitation (mm/year)

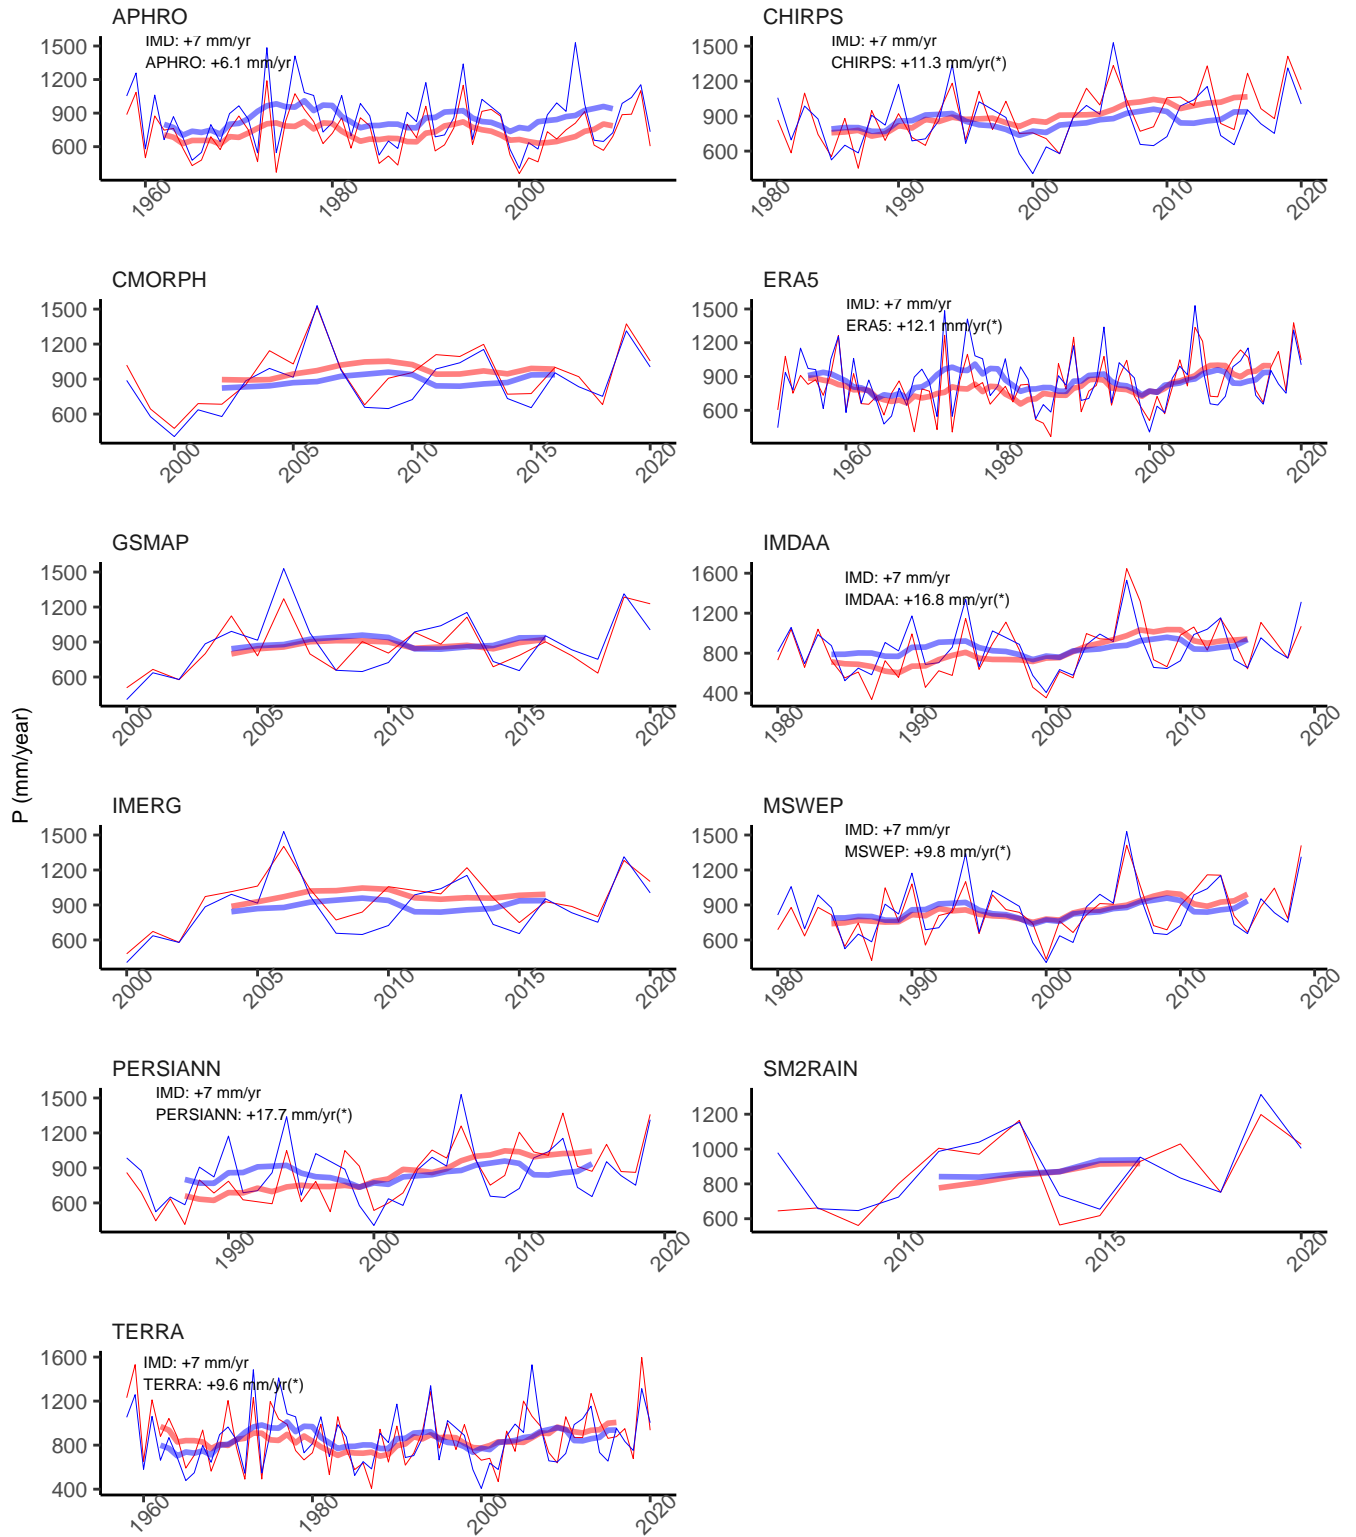

Figure S3.31: Same as Figure S3.16, except for the Mahi Basin.

Narmada, basin-averaged WY-based annual precipitation (mm/year)

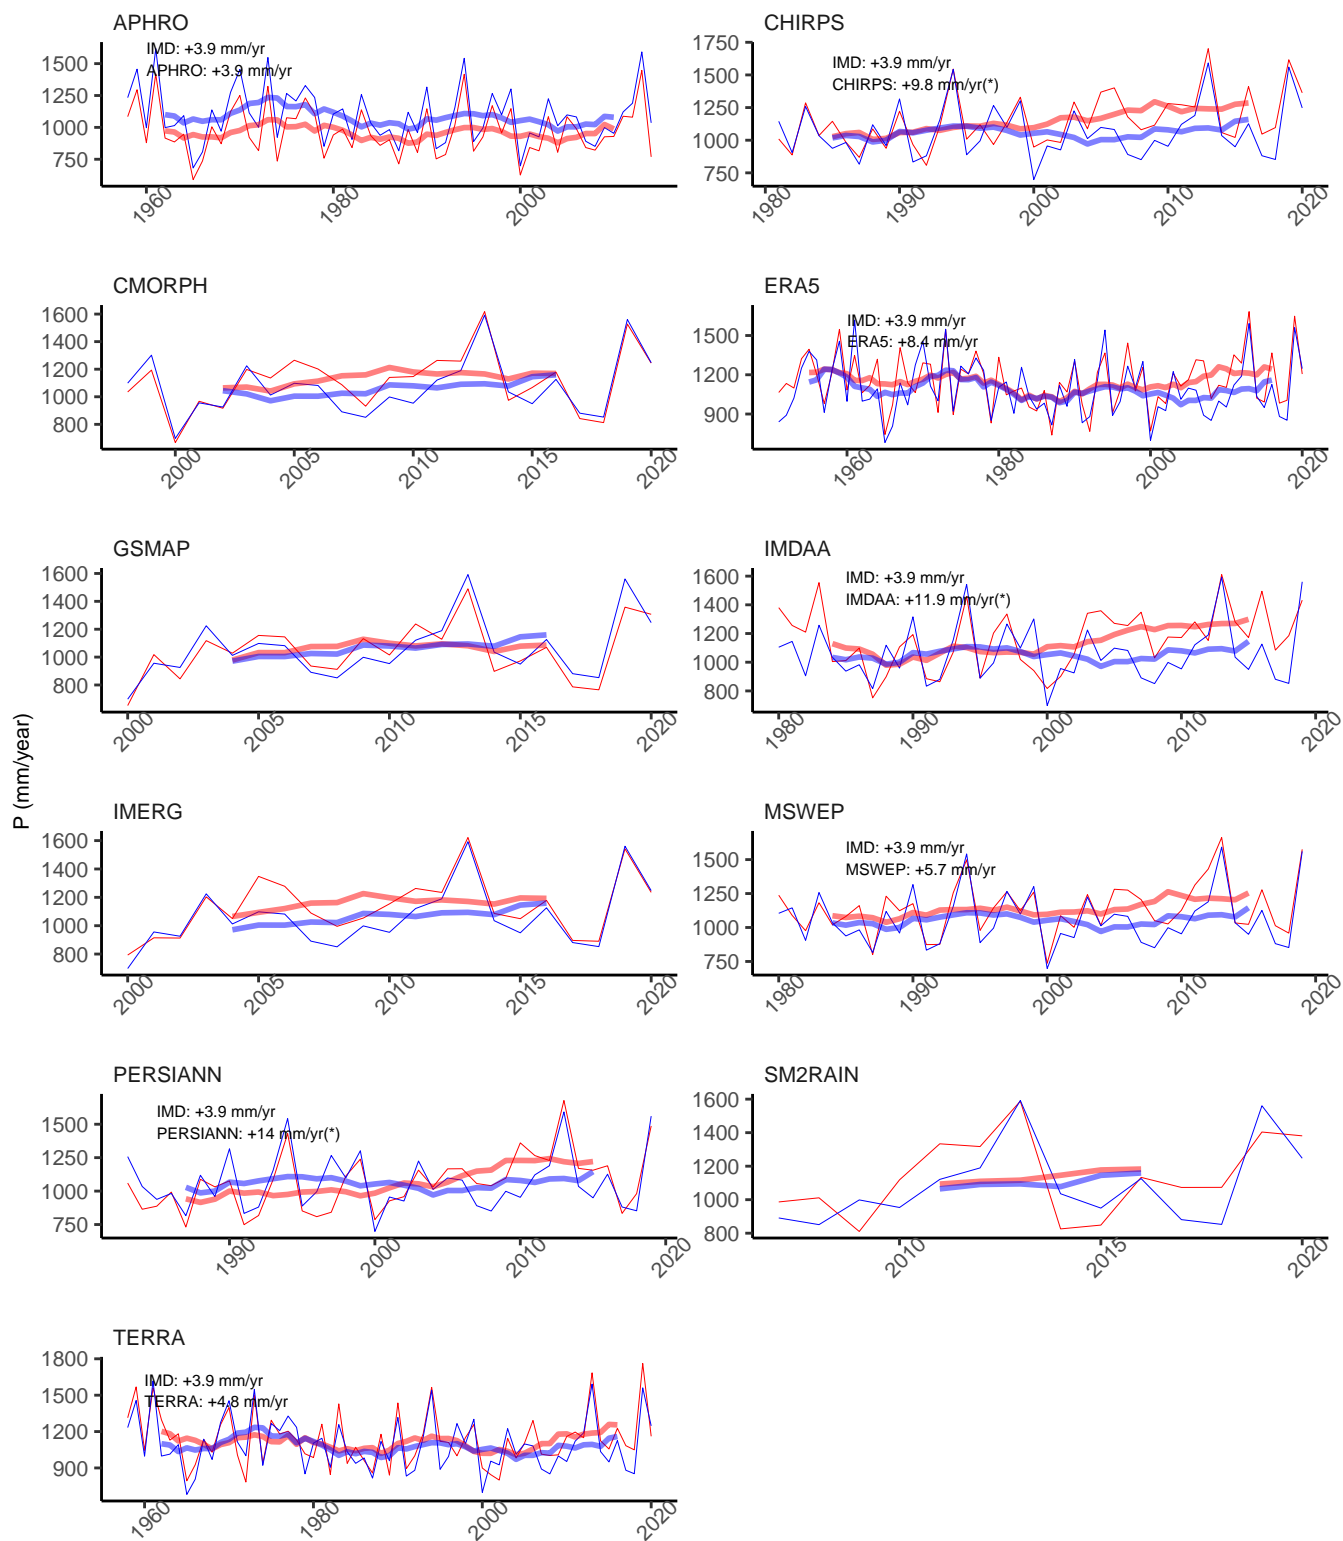

Figure S3.32: Same as Figure S3.16, except for the Narmada Basin.

Pennar, basin-averaged WY-based annual precipitation (mm/year)

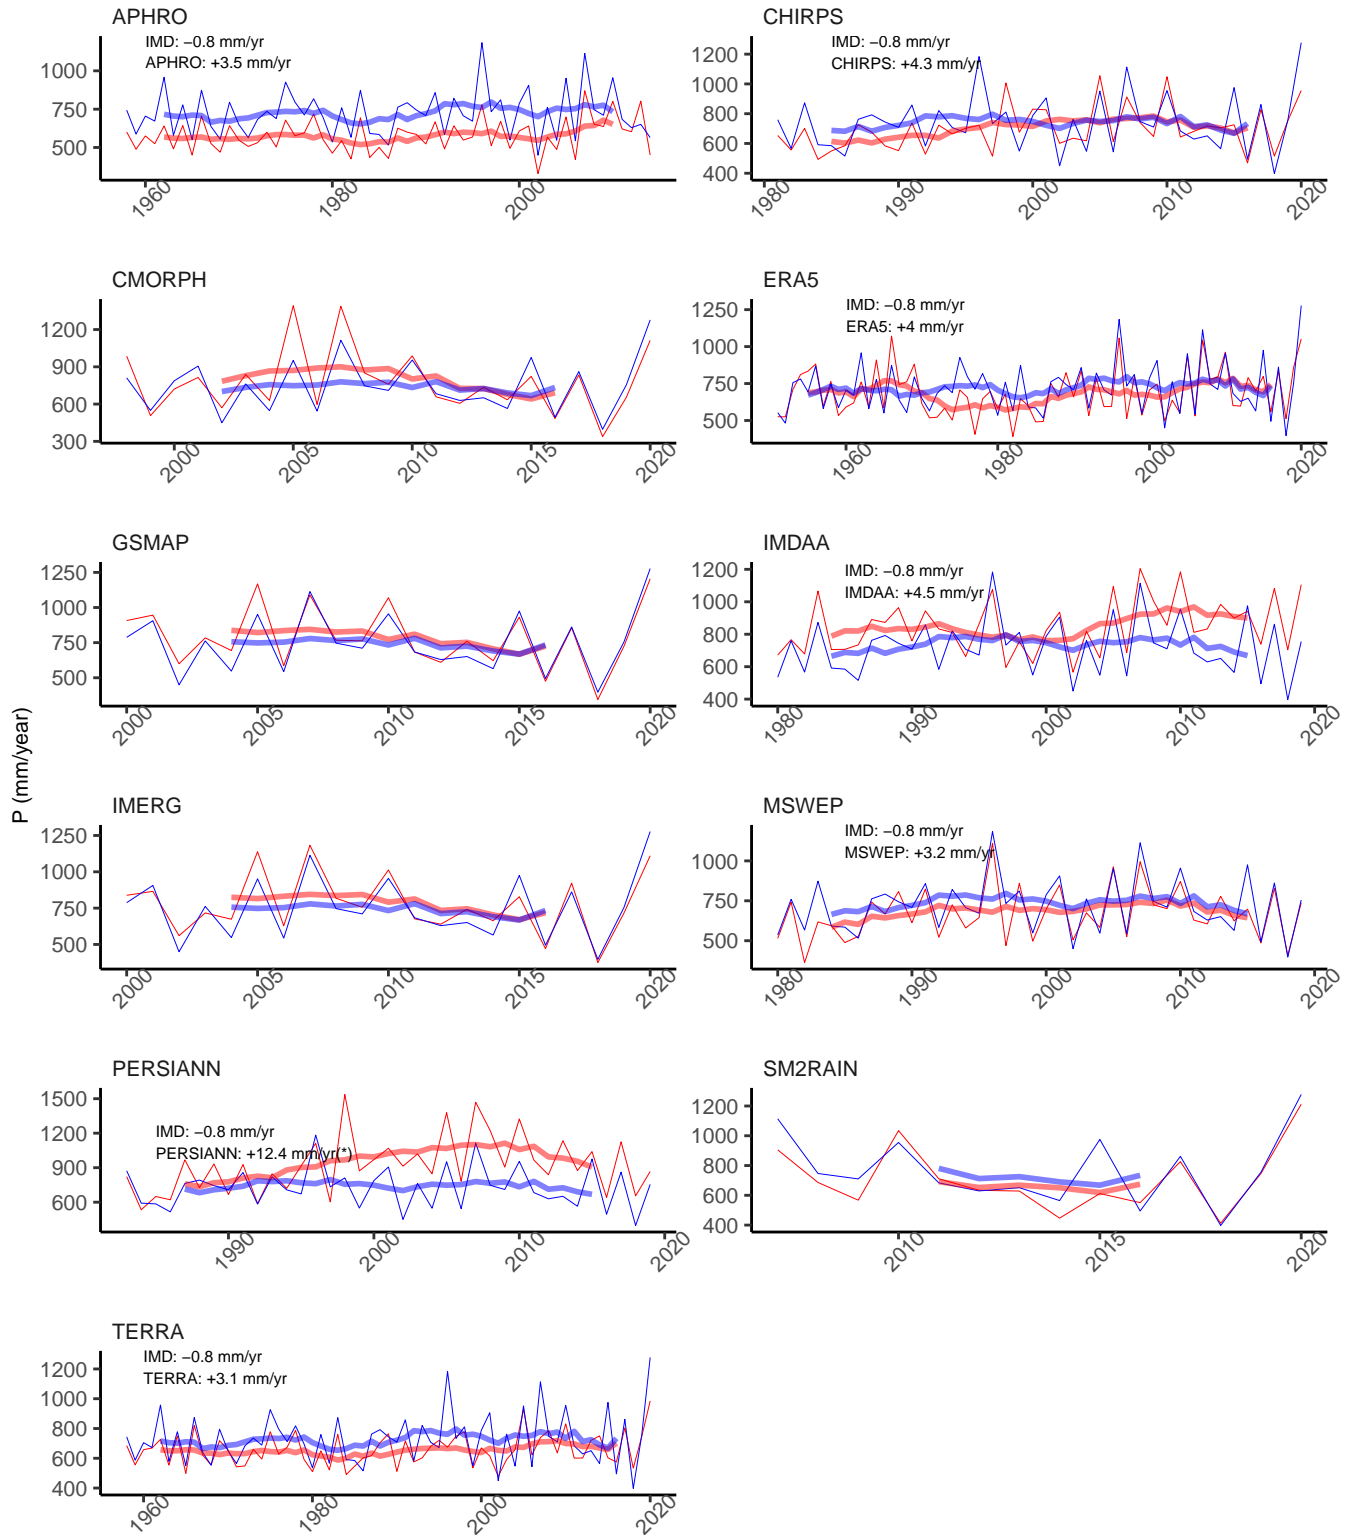

Figure S3.33: Same as Figure S3.16, except for the Pennar Basin.

Sabarmati, basin-averaged WY-based annual precipitation (mm/year)

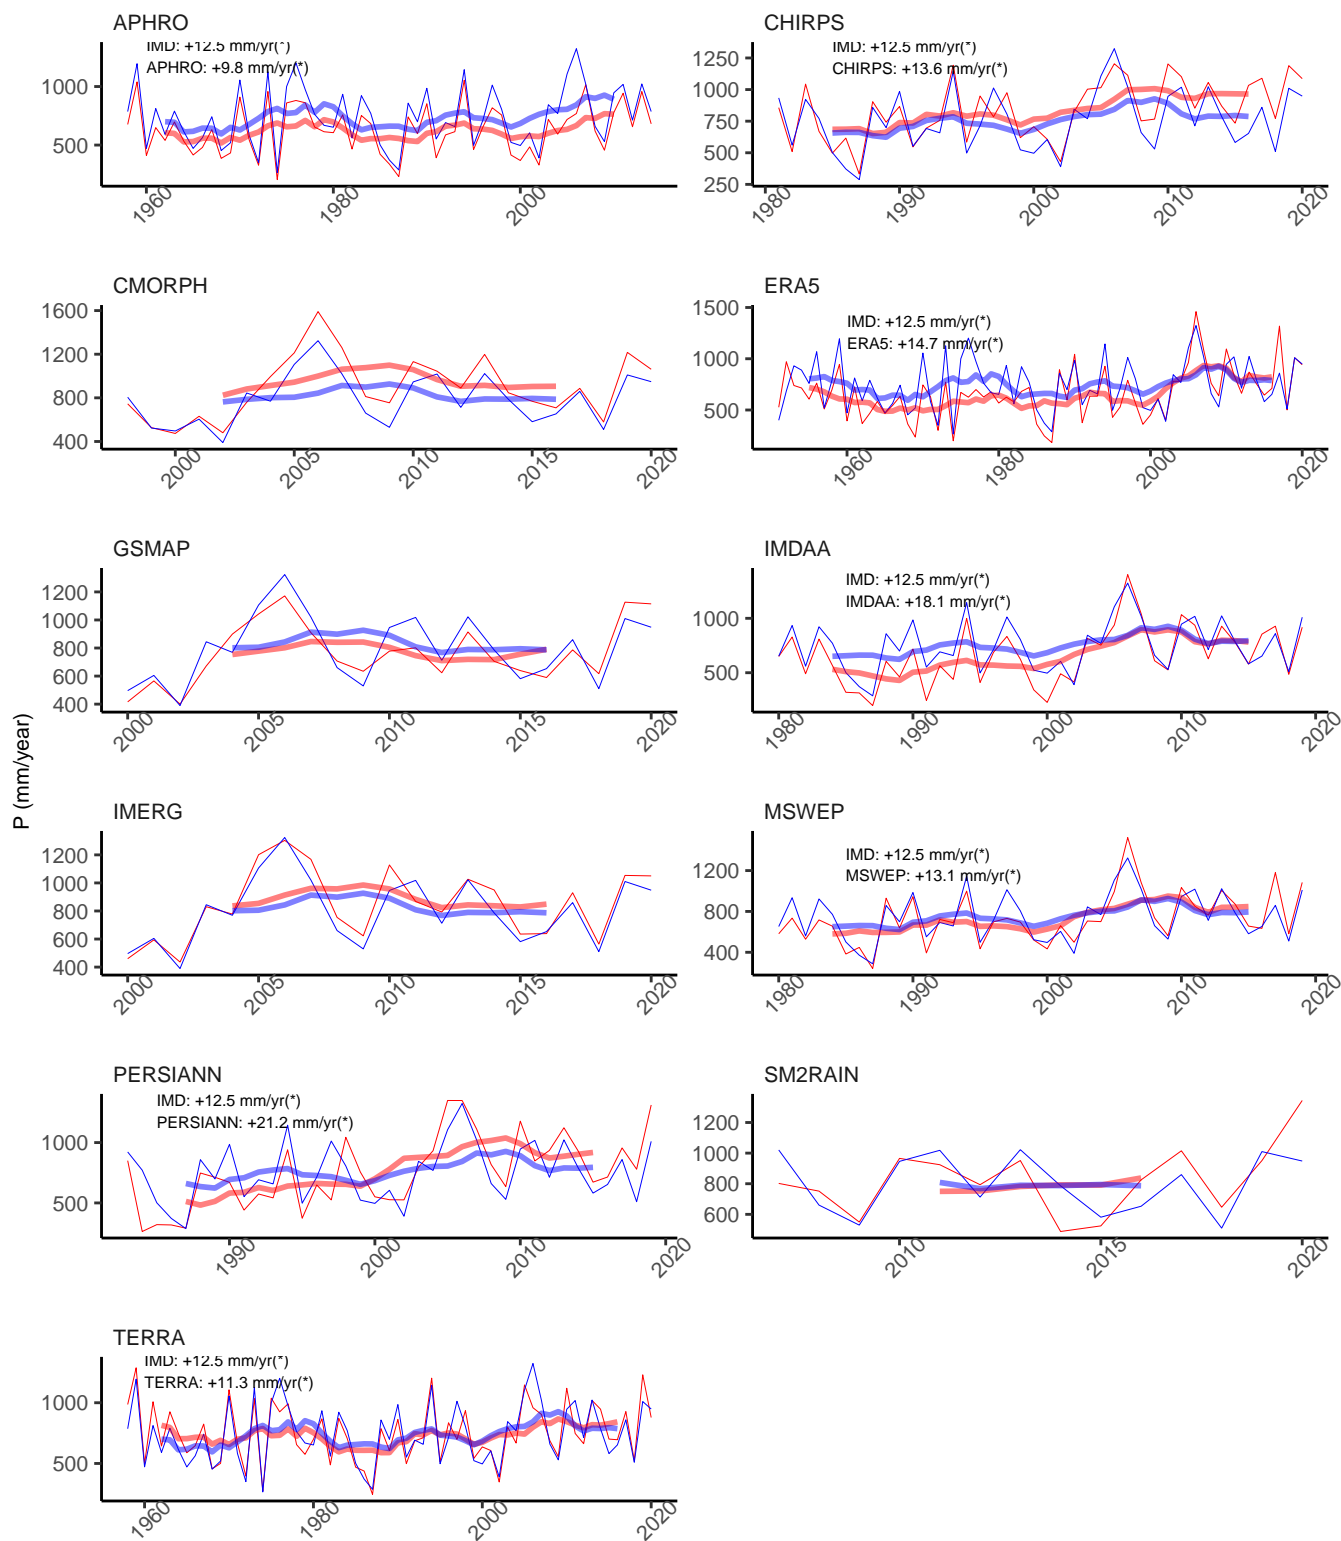

Figure S3.34: Same as Figure S3.16, except for the Sabarmati Basin.

Subernarekha, basin-averaged WY-based annual precipitation (mm/year)

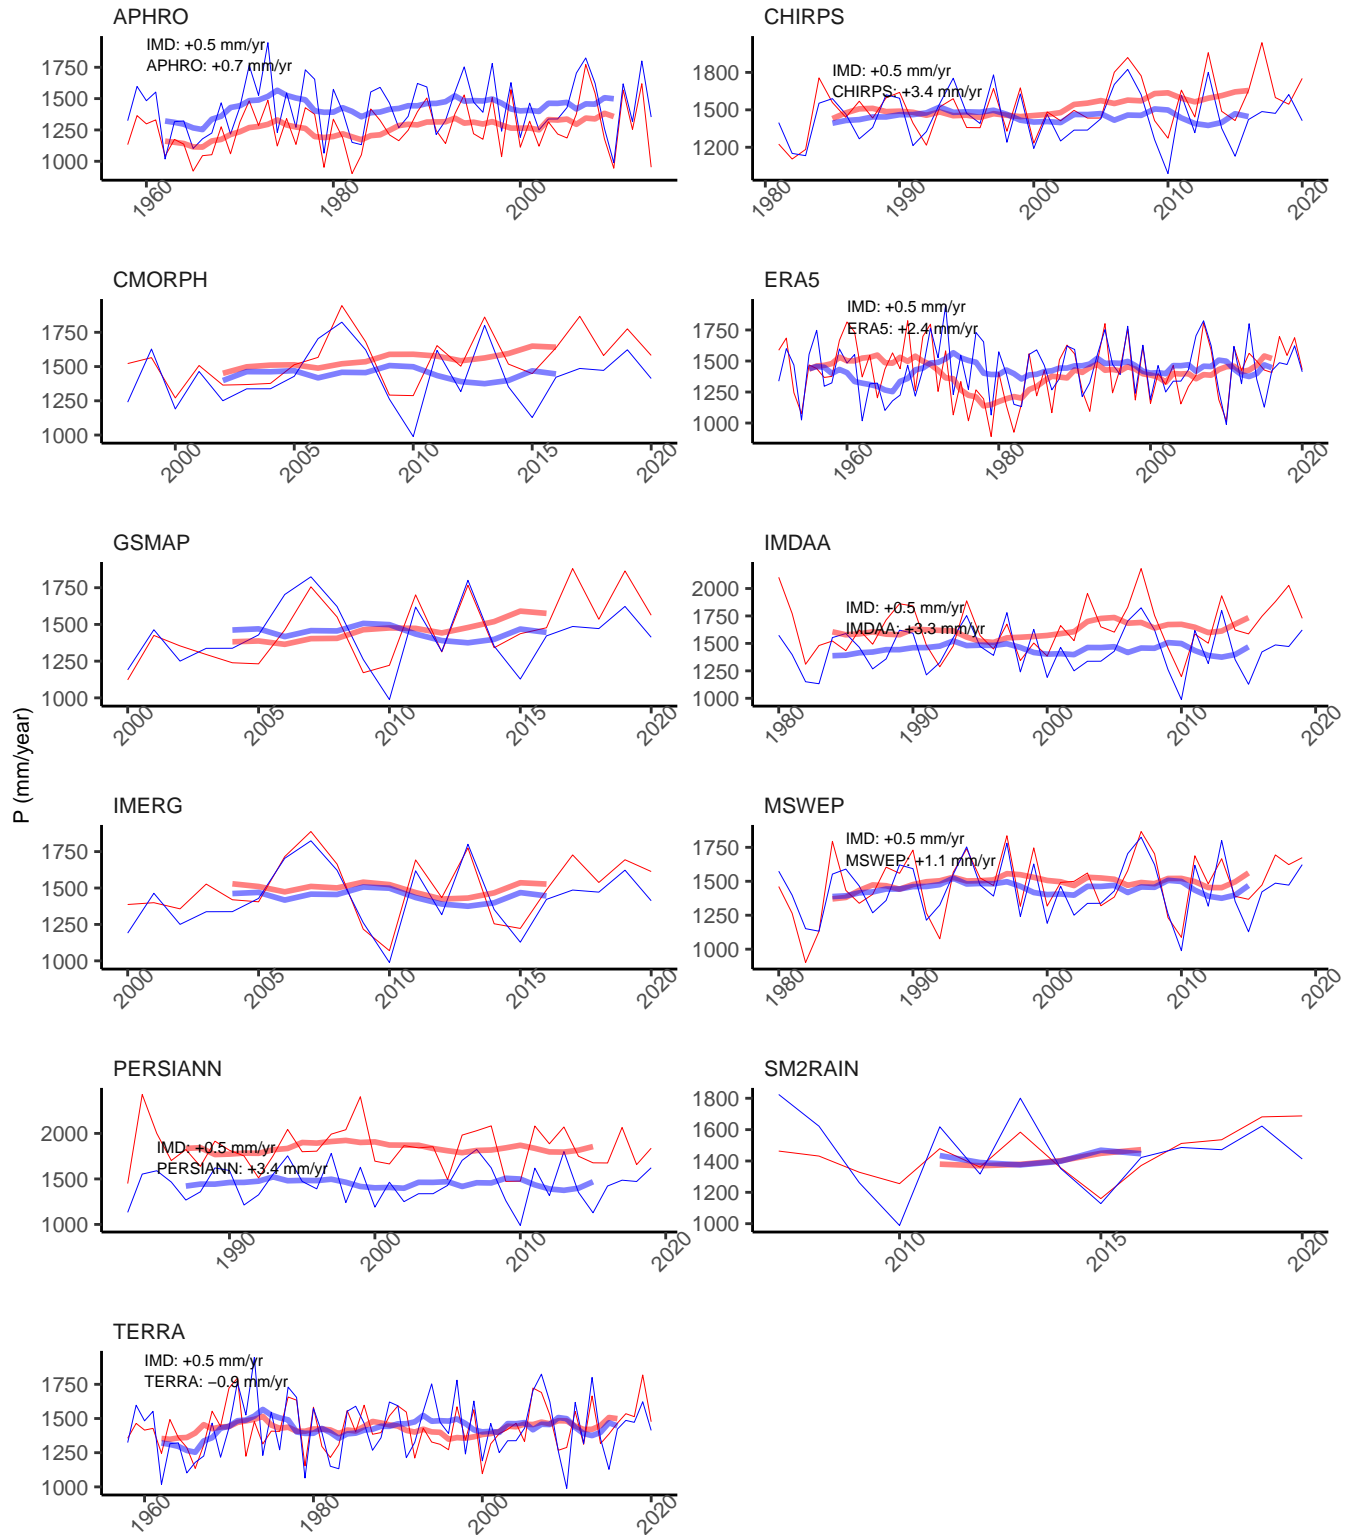

Figure S3.35: Same as Figure S3.16, except for the Subernarekha Basin.

Tapi, basin-averaged WY-based annual precipitation (mm/year)

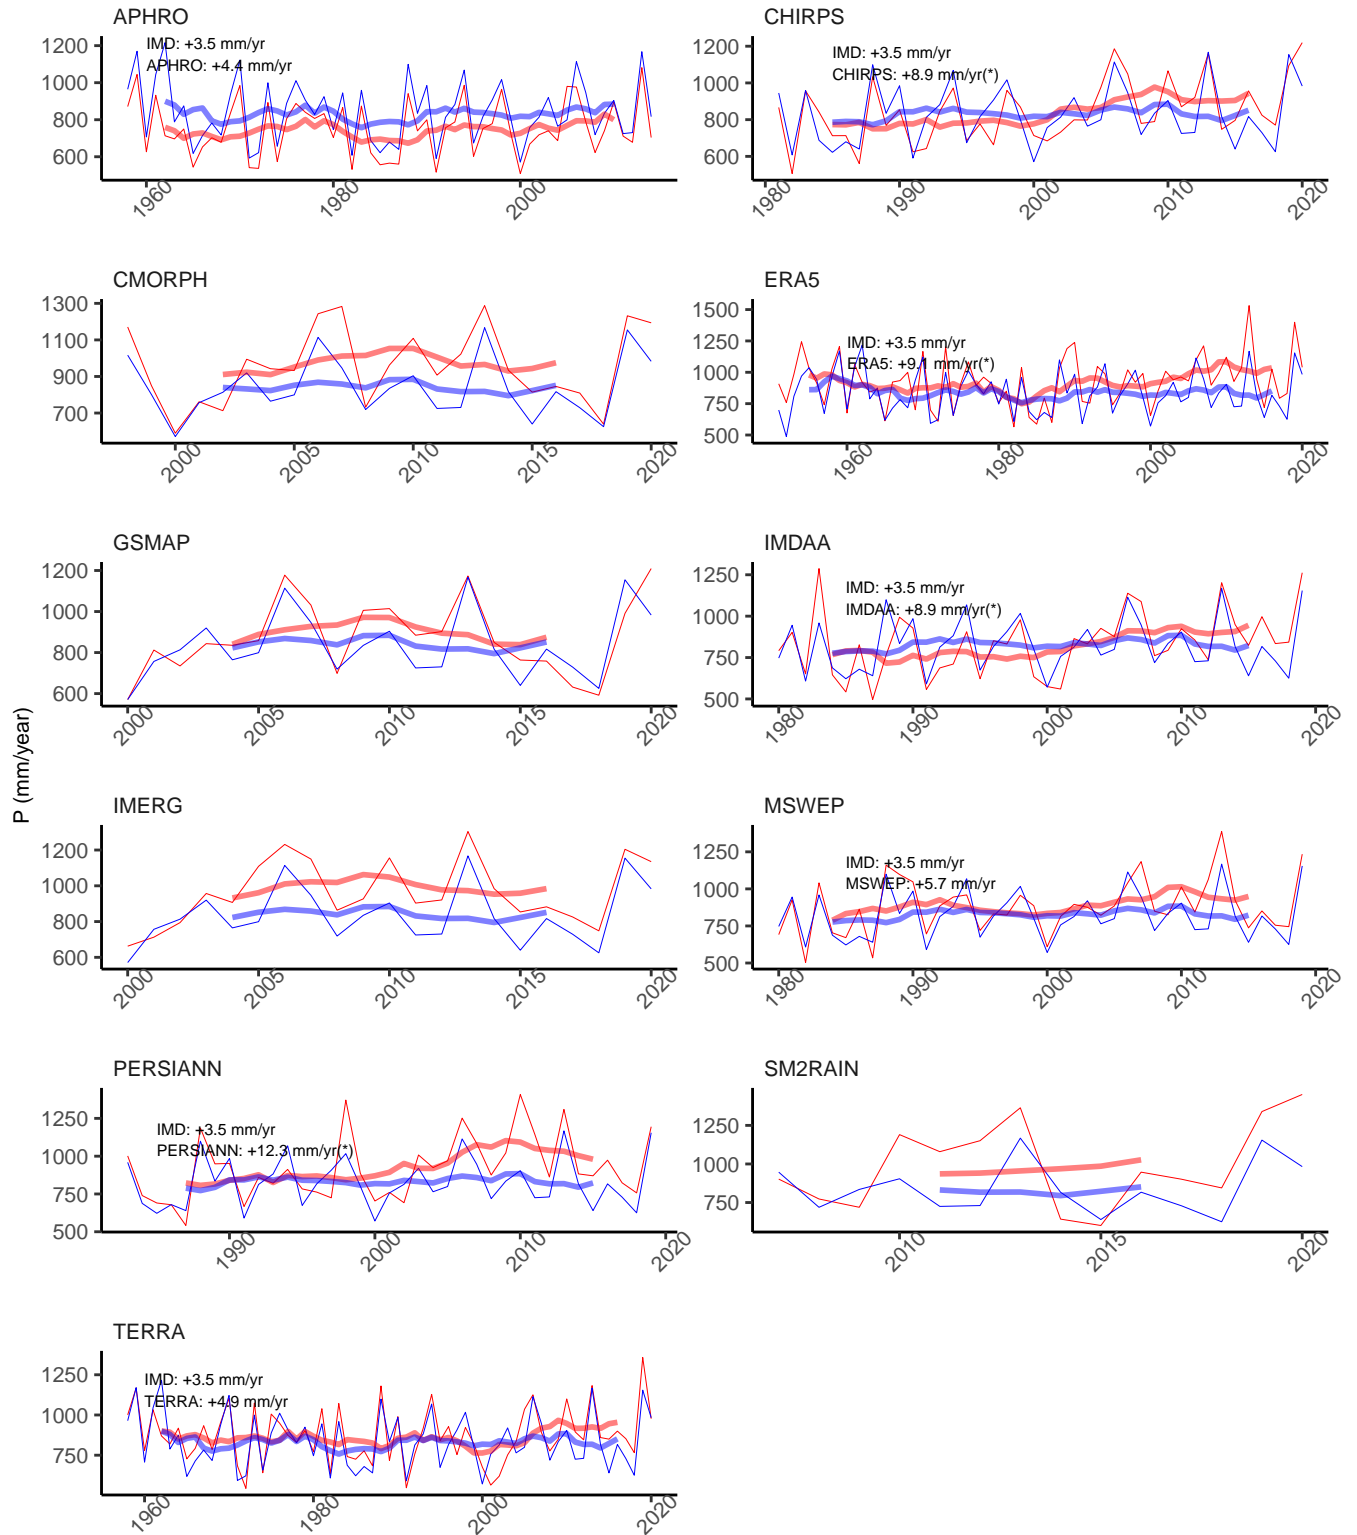

Figure S3.36: Same as Figure S3.16, except for the Tapi Basin.

WFR North, basin-averaged WY-based annual precipitation (mm/year)

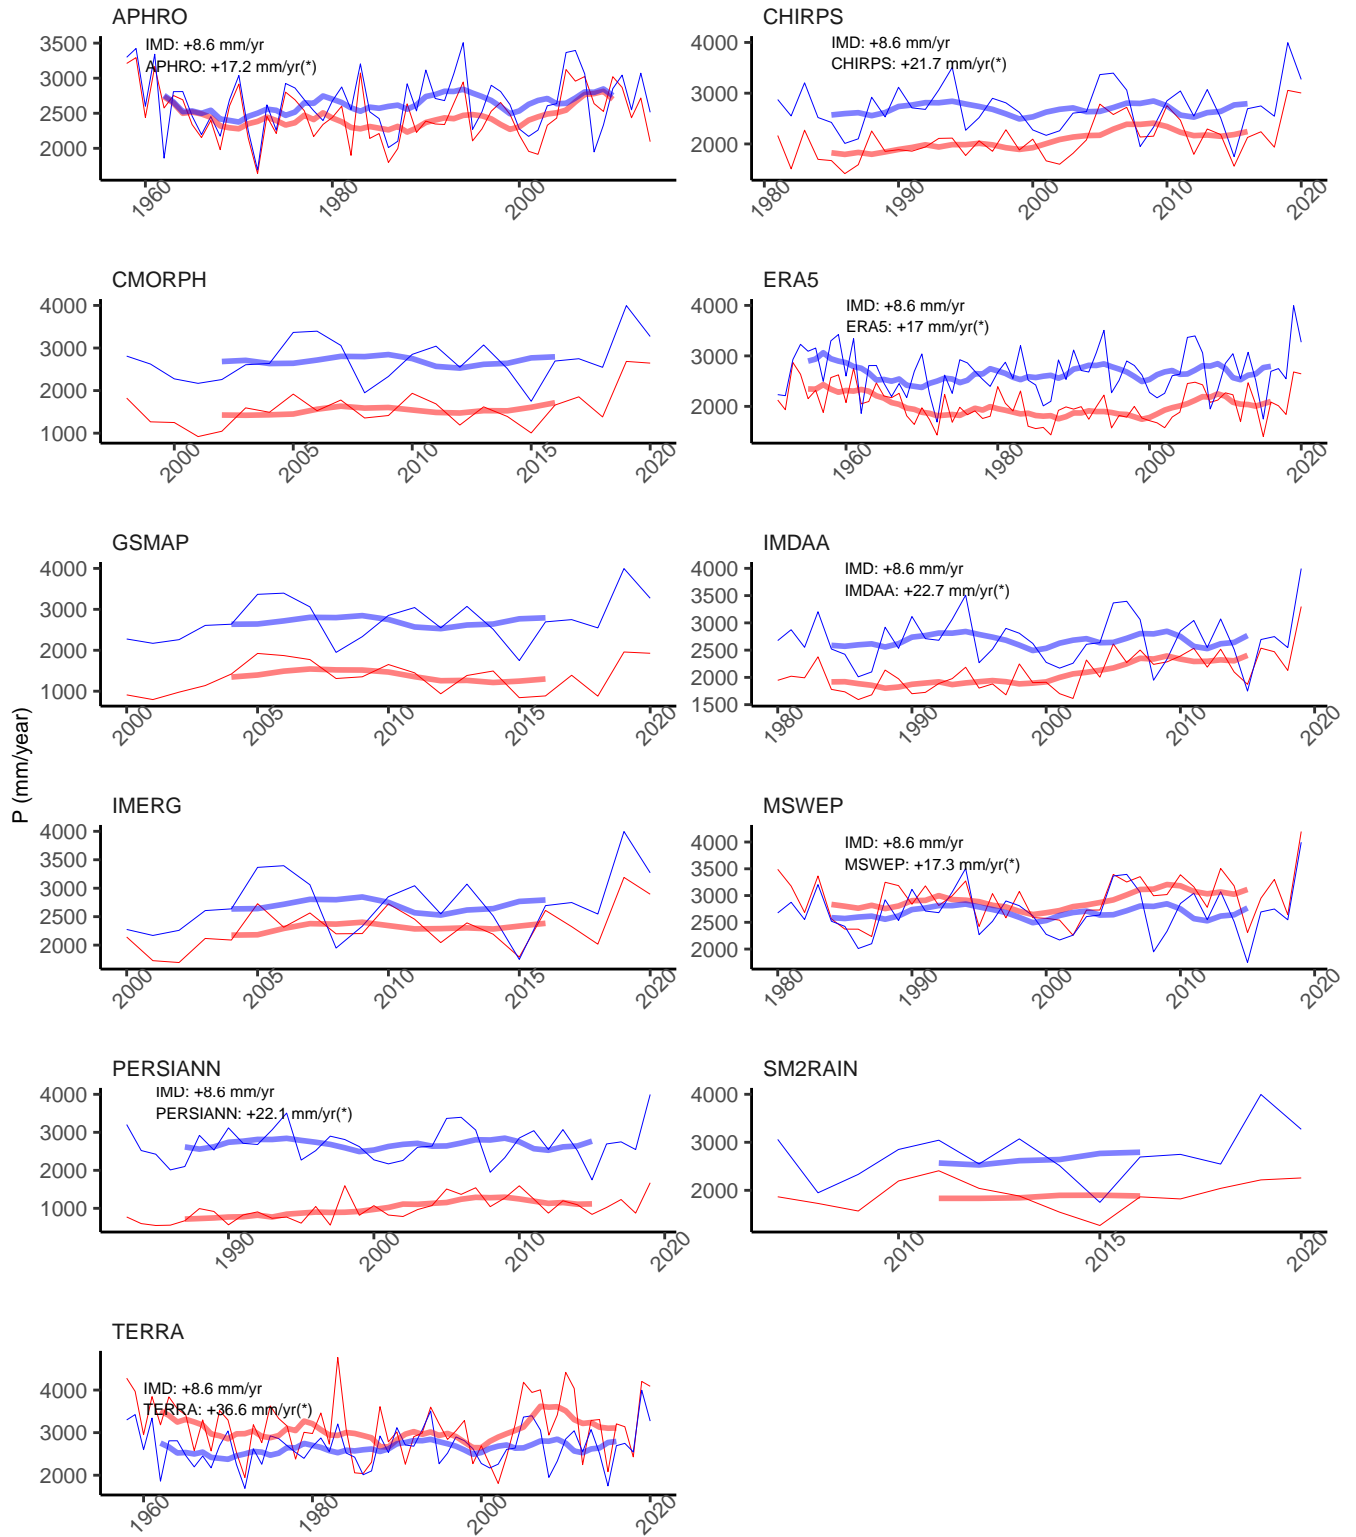

Figure S3.37: Same as Figure S3.16, except for the WFR North Basin.

WFR South, basin-averaged WY-based annual precipitation (mm/year)

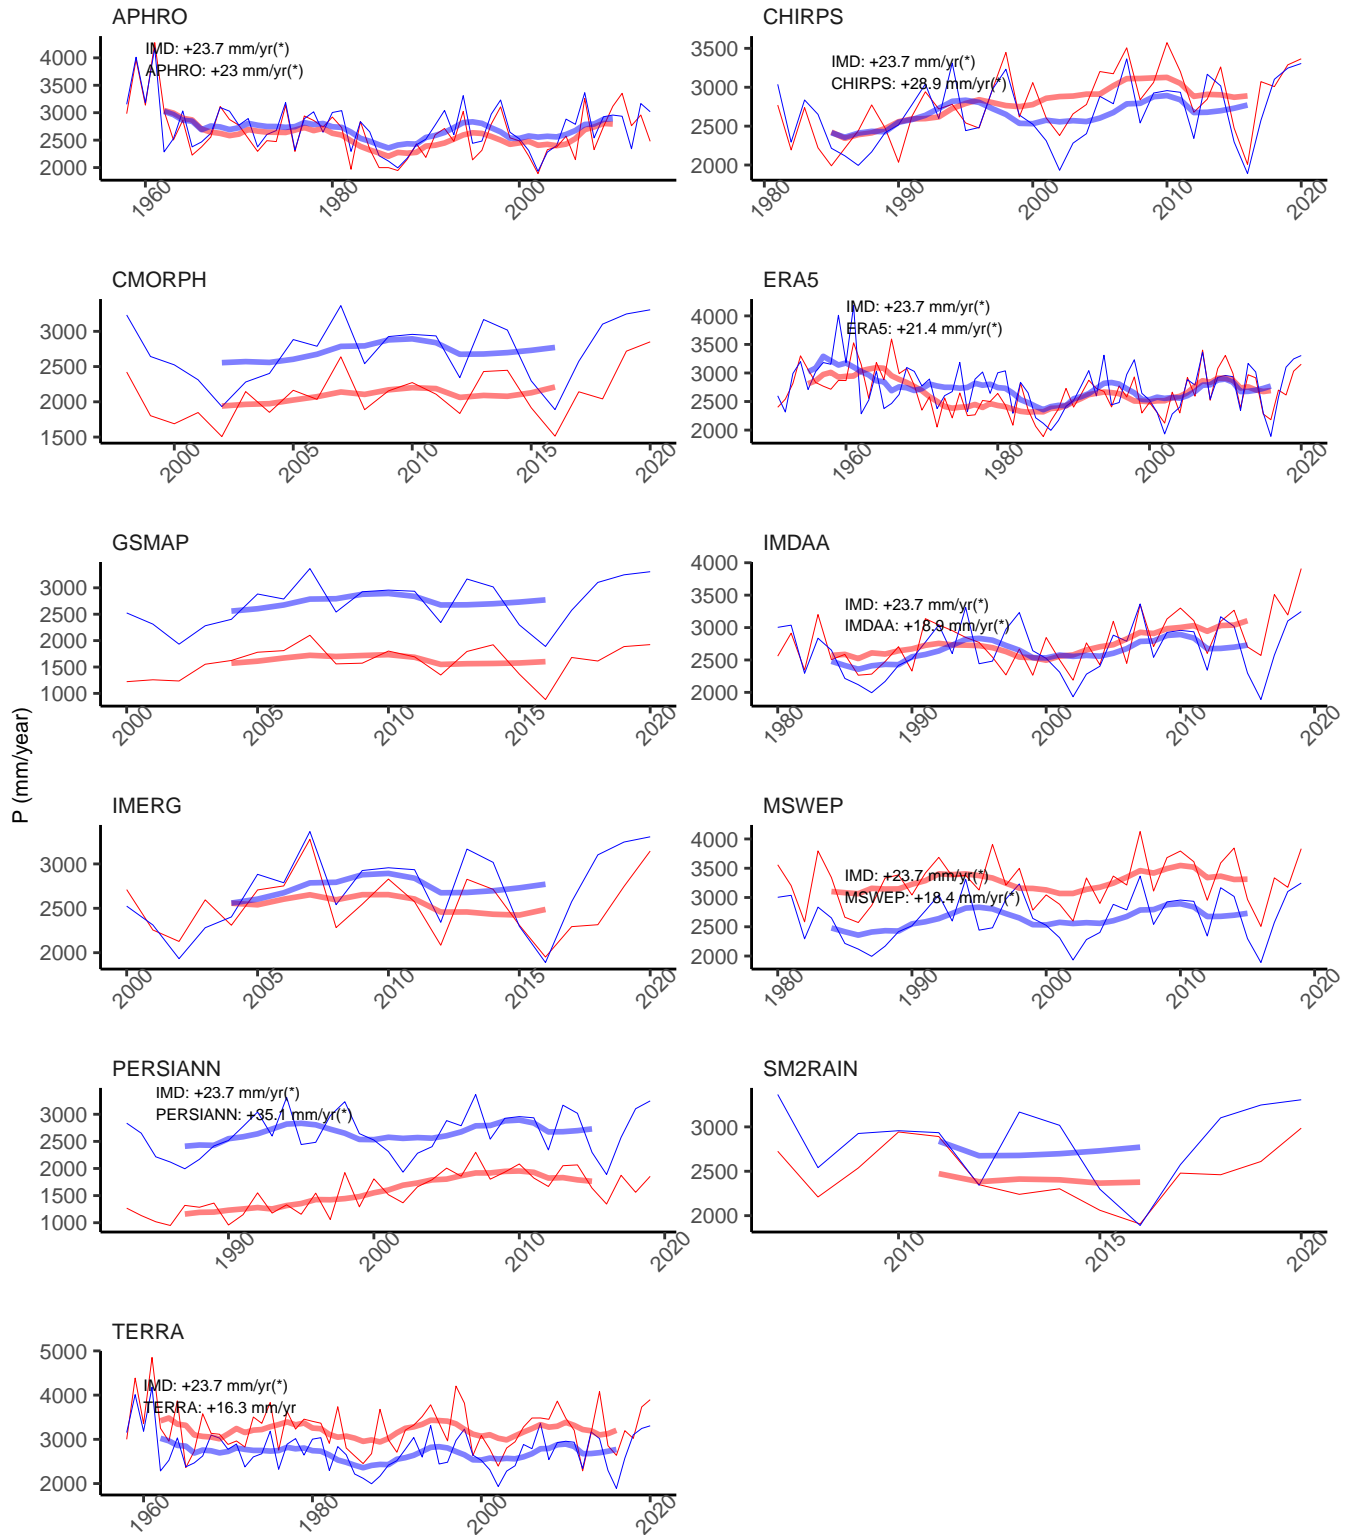

Figure S3.38: Same as Figure S3.16, except for the WFR South Basin.



### S3.4 IMD versus Other Products

Table S3.2: Trend in annual basin-aggregated  $P$  (mm/year) for WY 1985-2014 for select datasets. Statistically significant values are indicated by ‘(\*)’. All datasets were limited to the boundaries of India since IMD is limited to such boundaries (i.e., IMD-APHRO is not used here).

| Basin              | IMD      | APHRO    | CHIRPS   | ERA5     | IMDAA    | MSWEP    | PERSIANN | TERRA    |
|--------------------|----------|----------|----------|----------|----------|----------|----------|----------|
| All India          | -1.7     | +2.8     | +4.6(*)  | +3.2     | +3.6     | +2.1     | +10(*)   | +2.3     |
| Barak              | -33.2(*) | -9.9     | -0.8     | -11.3    | -5.9     | -16.4(*) | -4.6     | -12.2    |
| Brahmaputra        | -19(*)   | -3.4     | -2.3     | -19.1(*) | -13.3    | -13.9(*) | -0.9     | -7.5     |
| Ganga              | -4       | -2.4     | +1.2     | +1.7     | +0.8     | +2.6     | +8.5(*)  | -4.1     |
| Indus              | -12.2(*) | +7.2(*)  | +1.1     | -6(*)    | -4.4     | -3.2     | +13.2(*) | -1.2     |
| Minor              | -8.3     | -7.3     | +0.2     | -6.3     | -3.8     | -7.9     | -2.3     | -9.4     |
| North Ladakh       | -28.7(*) | +2.3     | +1.1(*)  | 0        | +0.8     | +0.1     | +8.6     | -0.1     |
| WFR Kutch          | +5.8(*)  | +6.5(*)  | +5.1(*)  | +5.5(*)  | +6.8(*)  | +4.4     | +14.1(*) | +3.9     |
| Brahmani-Baitarani | -1.6     | +1.3     | +4.2     | +3.7     | +6       | +0.7     | +2.7     | +1.1     |
| Cauvery            | +6       | +8.4(*)  | +11(*)   | +10.8(*) | +4.3     | +6.6(*)  | +13.6(*) | +4.8     |
| EFR North          | -0.5     | +1.4     | +4.8     | +6.9     | +5       | +5.1     | +7.6     | -0.1     |
| EFR South          | +7.4     | +4.3     | +11(*)   | +7(*)    | +4.7     | +5.7     | +19(*)   | +3.7     |
| Godavari           | +1       | -0.7     | +5.7     | +5.6     | +9(*)    | +2.2     | +5       | +3.5     |
| Krishna            | +3.7     | +1.7     | +6.1     | +8.5(*)  | +7.2(*)  | +5       | +13.2(*) | +6.8     |
| Mahanadi           | +2.6     | +2.3     | +5.3     | +7.9     | +7.7     | +5       | -0.1     | +4.7     |
| Mahi               | +7       | +6.1     | +11.3(*) | +12.1(*) | +16.8(*) | +9.8(*)  | +17.7(*) | +9.6(*)  |
| Narmada            | +3.9     | +3.9     | +9.8(*)  | +8.4     | +11.9(*) | +5.7     | +14(*)   | +4.8     |
| Pennar             | -0.8     | +3.5     | +4.3     | +4       | +4.5     | +3.2     | +12.4(*) | +3.1     |
| Sabarmati          | +12.5(*) | +9.8(*)  | +13.6(*) | +14.7(*) | +18.1(*) | +13.1(*) | +21.2(*) | +11.3(*) |
| Subernarekha       | +0.5     | +0.7     | +3.4     | +2.4     | +3.3     | +1.1     | +3.4     | -0.9     |
| Tapi               | +3.5     | +4.4     | +8.9(*)  | +9.1(*)  | +8.9(*)  | +5.7     | +12.3(*) | +4.9     |
| WFR North          | +8.6     | +17.2(*) | +21.7(*) | +17(*)   | +22.7(*) | +17.3(*) | +22.1(*) | +36.6(*) |
| WFR South          | +23.7(*) | +23(*)   | +28.9(*) | +21.4(*) | +18.9(*) | +18.4(*) | +35.1(*) | +16.3    |

## S4 ET, GLEAM vs NTSG

The *ET* datasets GLEAM and NTSG were considered for this analysis, but GLEAM was used because of the longer time span of this dataset and its availability to the present time. *ET* from the Numerical Terradynamic Simulation Group (NTSG) at the University of Montana (Zhang et al., 2010) provides estimates of monthly *ET*. Goroshi et al. (2017) compared NTSG estimates with lysimeter-based *ET* observations across many locations in India, and found that while there is reasonable agreement between them at seasonal and annual timescales, NTSG was found to underestimate observed *ET* during the monsoon (June-August) and post-monsoon (September-November) seasons. Goteti (2022) noted a similar issue with GLEAM in Godavari and Krishna basins of Peninsular India.

A comparison of GLEAM and NTSG, for the overlap period of WY 1982-2012 is presented here for the basins of Northern India (Figure S4.1) and Peninsular India (Figure S4.2). The basin-aggregated average *ET* for the major basins is shown. For ease of visualization, the extreme values - the lowest and highest annual values within each basin, corresponding to the NTSG dataset were excluded. In general, there is a reasonable correlation between GLEAM and NTSG across many basins. GLEAM values are also lower than NTSG for many basins, as indicated by the negative values of percent bias ('pbias'). Given NTSG's low bias, this indicates an even larger low bias with GLEAM's *ET*.

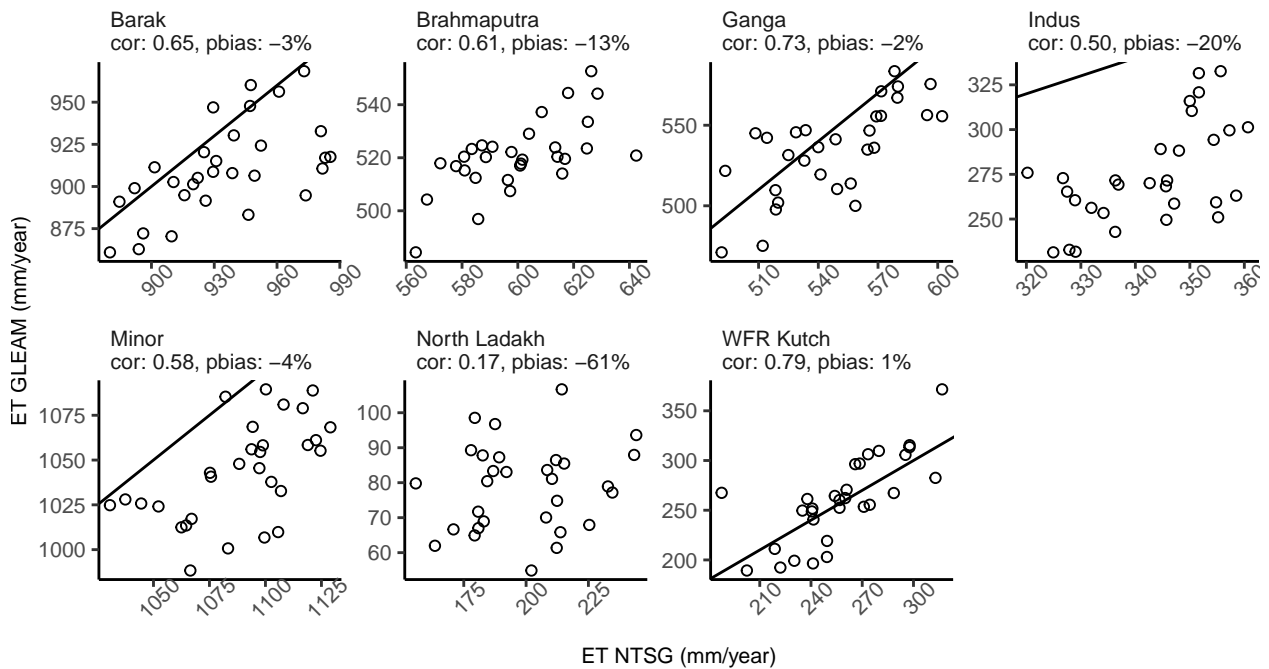

Figure S4.1: Basin-averaged annual ET from NTSG and GLEAM for the major river basins of Northern India, for the overlap period of WY 1982-2012. The solid line shows the 1:1 correspondence line. 'cor' indicates the Spearman rank correlation, while 'pbias' is the percent bias (GLEAM relative to NTSG).

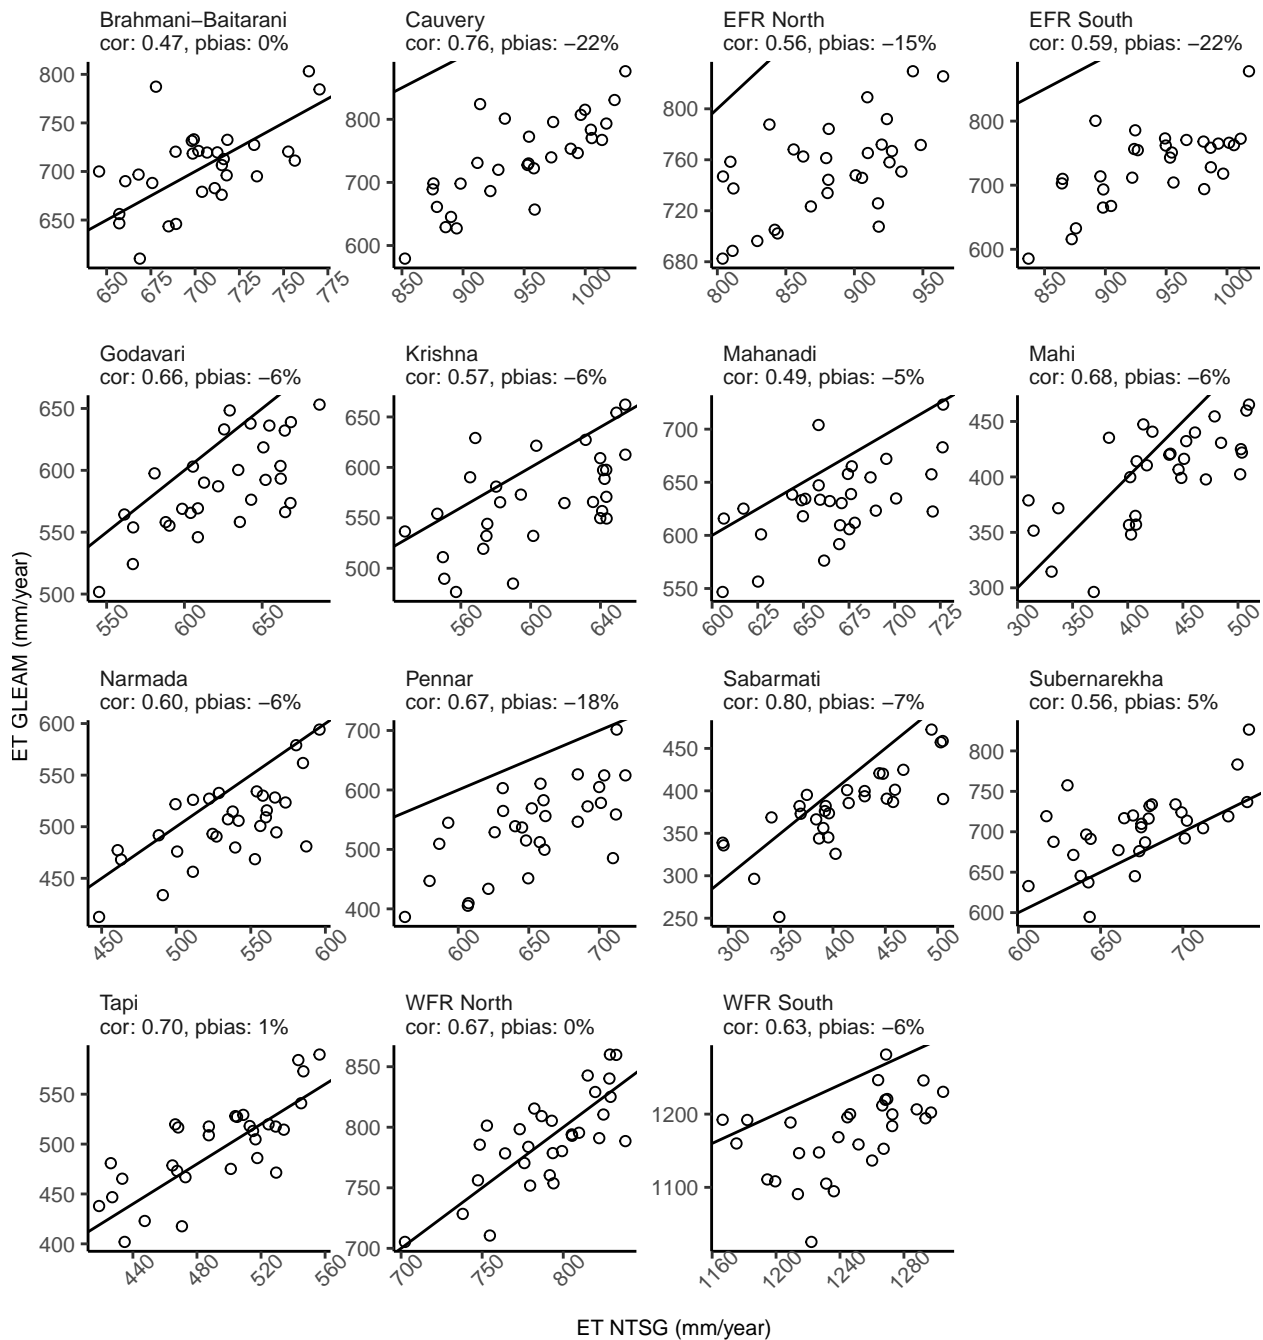

Figure S4.2: Same as Figure S4.1 but for Peninsular India

## S5 Water Management

### S5.1 Groundwater Extraction

Groundwater extraction and recharge estimates are available from India's Central Ground Water Board (CGWB, <http://cgwb.gov.in/>) for select years (<https://ingres.iith.ac.in/>). These estimates are available at the administrative district resolution. Districts in India are the third administrative tier, following national and state tiers. However, official GIS data on district boundaries is not readily available from Indian agencies. Moreover, administrative boundaries, including district and state boundaries, have been subject to change in the recent past (e.g., the states of Andhra Pradesh and Telangana). Available GIS data on district boundaries from geoBoundaries (Runfola et al., 2020) was compiled so that the names of the districts and their areas closely matched those from CGWB. The estimates from two recent years, WY 2019-20 and WY 2021-22 are used here. In order to have reliable district boundaries and also retain as much information as possible, the data for the State of Andhra Pradesh was taken from WY 2019-20 and data for the remaining states was from WY 2021-22.

Total groundwater extracted was estimated by CGWB for three different categories: command (or irrigated) - 'C', non-command (or non irrigated) - 'NC', and poor quality - 'PQ'. Consistent with CGWB, only the 'C' and 'NC' categories were used here to estimate the total volume of groundwater extracted. Annual  $P$  is also available from CGWB, and it was converted to a volume using the area of each district estimated by CGWB. Finally, the district-wise extent of annual groundwater extraction is quantified as a fraction of the annual  $P$  and is presented in Figure 3 of the paper.

### S5.2 Imports and Exports

CWC-19 (2019) estimated the water resources availability for the major river basins of India and their sub-basins for WY 1985-2014, and during this process quantified the various inputs and outputs to these basins, including both natural and human-caused factors (Annexures A-S). The variables quantified by CWC-19 include volume of basin-aggregated  $P$ , imports to the basin, and exports from the basin. Both imports and exports are expressed as a fraction of annual  $P$ , and the maximum value of such estimates is presented in Figure 3 of the paper.

### S5.3 Dams and Reservoirs

Information on large dams in India was obtained from the National Registry of Large Dams (NRLD, 2019). Raw data from NRLD for 5,745 large dams was available as a Portable Document Format (PDF) file. This data was first compiled into a spreadsheet and then imported into a GIS software to perform basic quality checks. Locations of dams with missing latitude or longitude, or those falling in the ocean or outside of India's political boundaries, were deemed spurious and discarded. Thus, a total of 5,629 dams were considered for this analysis. The specific purpose of the dam - such as storage, irrigation or hydro power, was not considered. For ease of illustration, the locations of the dams were mapped to a 25 km grid and the number of dams per each such grid is displayed in Figure 3 of the paper. It

is evident that the density of dams is the largest in the arid Western India. The density of dams is low along the Western Coast of India, in the Gangetic Plains and the mountainous portions of Northern India.

Other than the coordinates of the dam, the attributes of interest for each dam are the year of construction of the dam, the maximum live storage capacity and the total storage capacity of the dam. While a vast majority of the dams had such information available, some dams had this information missing. If the year of construction of a dam was missing, it was assumed to be 1950 - the earliest year of analysis. If live storage capacity was missing, it was assumed to be 0.9 times (or 90%) of the total storage capacity. The factor of 0.9 used here was based on the median ratio of such a factor where information was available. Once all the relevant information on dams was compiled, the river basin and watershed associated within each dam was identified using a GIS analysis. Thus, for a given streamflow gauging station, all the dams present in the upstream catchment area were identified. The annual cumulative live storage capacity for each gauging station, and for each year, was estimated as the sum total of all such upstream dams, taking into account the year of construction of the dam. In Figure 3 of the paper, cumulative live storage capacity in WY 2019 (the latest year for which data is available from NRLD) is expressed as a fraction of average annual  $P$ .

## S6 Estimates of Annual $\Delta TWS$

Temporal changes in the Earth’s gravity field measured by the Gravity Recovery and Climate Experiment (GRACE) satellite mission (Tapley et al., 2004) have been used to infer changes in total terrestrial water storage ( $TWS$ ) (Rodell et al., 2009).  $TWS$  includes groundwater, soil moisture, surface water (rivers, lakes, wetlands and reservoirs), snow and ice (including glaciers), canopy interception, and water within vegetation.

GRACE does not provide the total amount of  $TWS$  nor its long-term average ( $\overline{TWS}$ ), but instead provides estimates of  $TWS$  anomalies (i.e.,  $TWSA = TWS - \overline{TWS}$ ) (Humphrey et al., 2023). Raw data from GRACE can be processed using several mathematical techniques to generate useful end products, and there are many such products currently available (Humphrey et al., 2023). This study uses the often-used 0.25 deg ( $\sim 25$  km) resolution anomalies from the Center for Space Research (Save et al., 2016; Save, 2020).

The difference between the anomalies at two different times gives an estimate of the change in  $TWS$  (or  $\Delta TWS$ ) over that time period. Change in annual  $TWS$  (or  $\Delta TWS$ ) is of primary interest for the purposes of this analysis. Considering the definition of WY used in this study (period of June through May),  $\Delta TWS$  was estimated using an equation similar to Eq. S6.1. As discussed by Humphrey et al. (2023), equation Eq. S6.1 is an approximation since GRACE monthly anomalies do not correspond to exact calendar months.

$$\Delta TWS_{WY\ 2010} = TWSA_{May\ 2011} - TWSA_{June\ 2010} \quad (S6.1)$$

Consistent with the other analyses of this study where hydrological variables were represented as a fraction of annual  $P$ ,  $\Delta TWS$  was also estimated as a fraction of annual  $P$ , using  $P$  from the IMD-APHRO dataset. The annual maps of  $\Delta TWS$  are shown in the following graphics, for years when GRACE data is available for the months of May and June (starting WY 2002), and for years for which the IMD-APHRO dataset is available (up to WY 2014). Overall, there are 10 WYs during WY 2002-2014 for which such maps could be created. Figure 4 of the paper shows the grid-wise maximum and minimum  $\Delta TWS$  across all such WYs.

Delta TWS, WY 2004

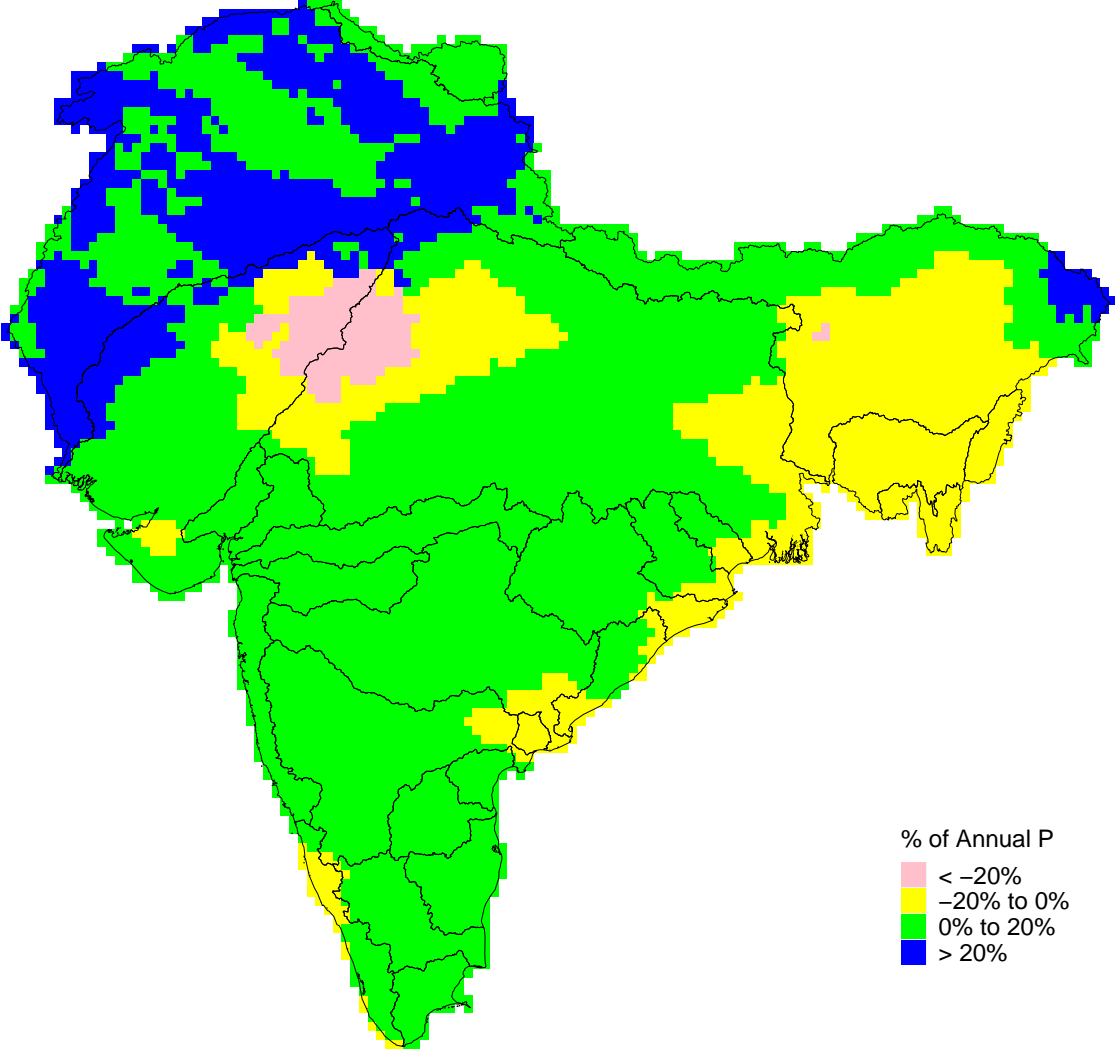

Delta TWS, WY 2005

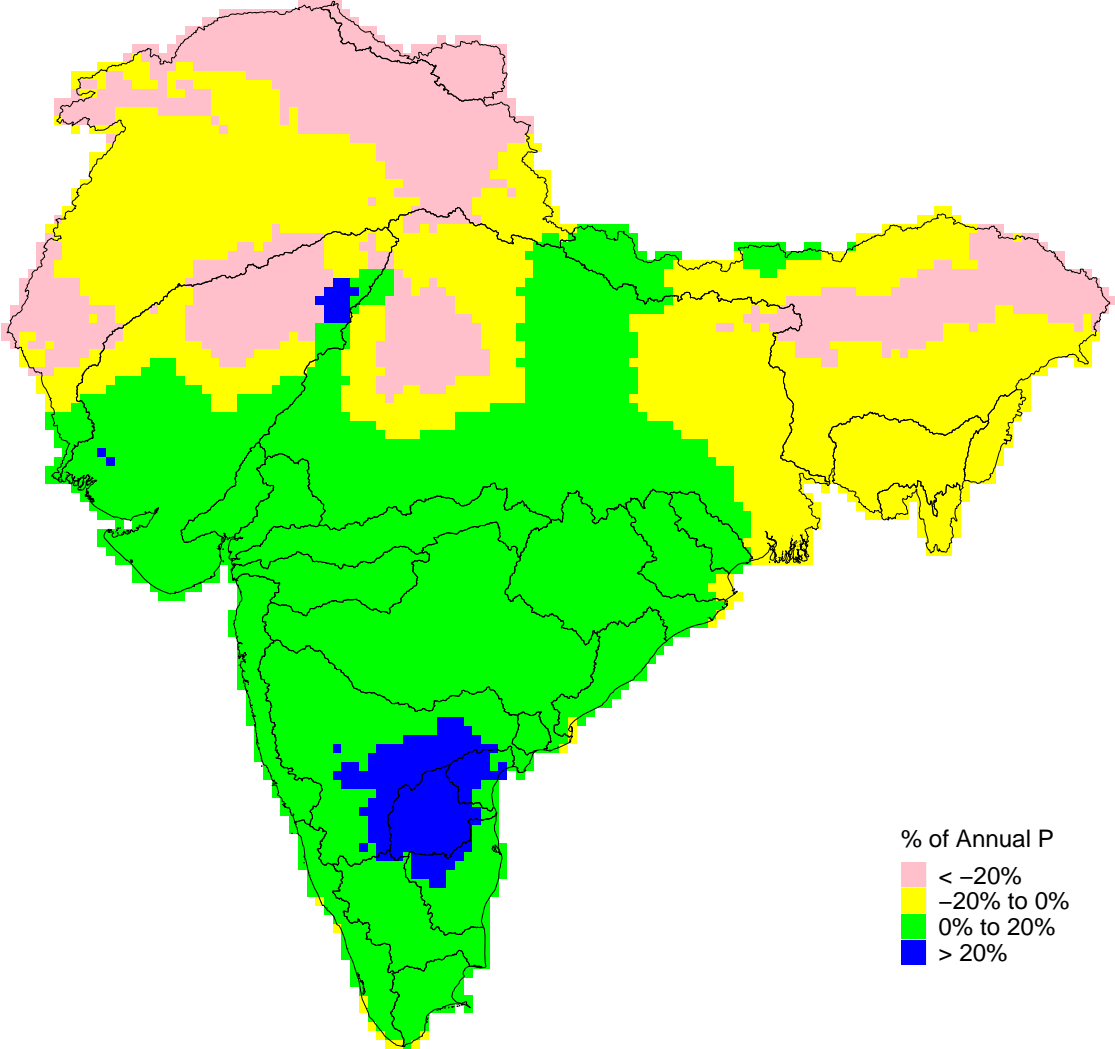



Delta TWS, WY 2006

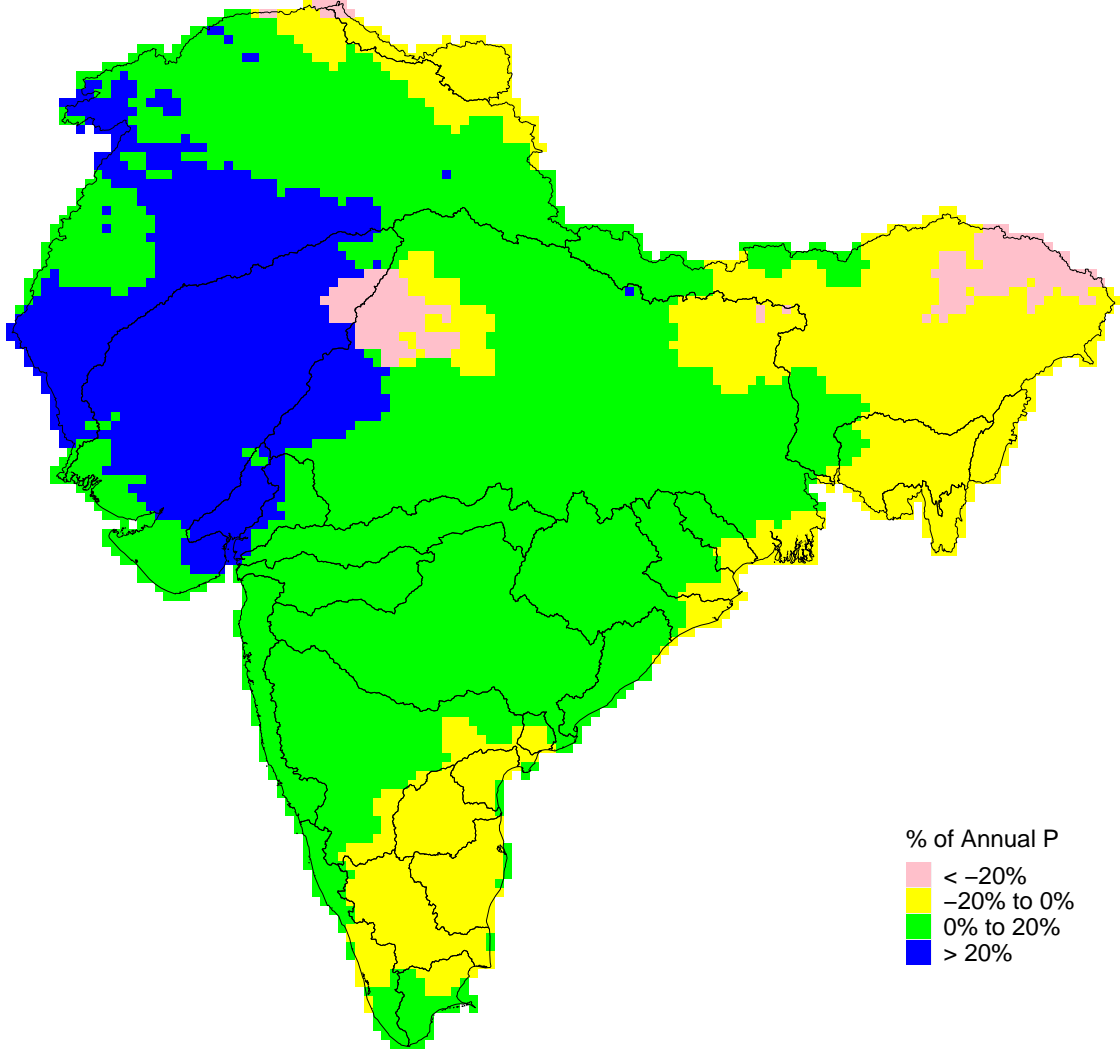

Delta TWS, WY 2007

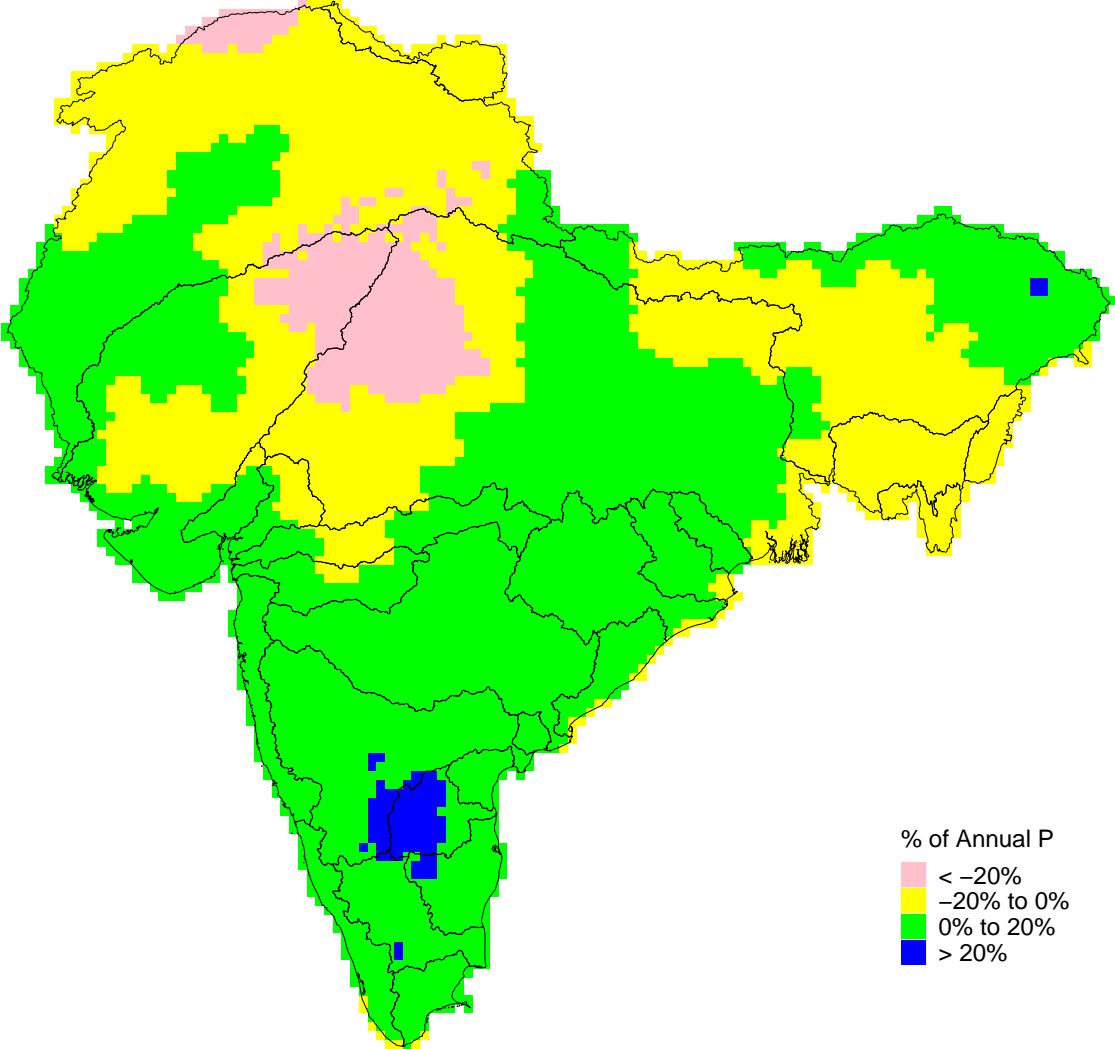

Delta TWS, WY 2008

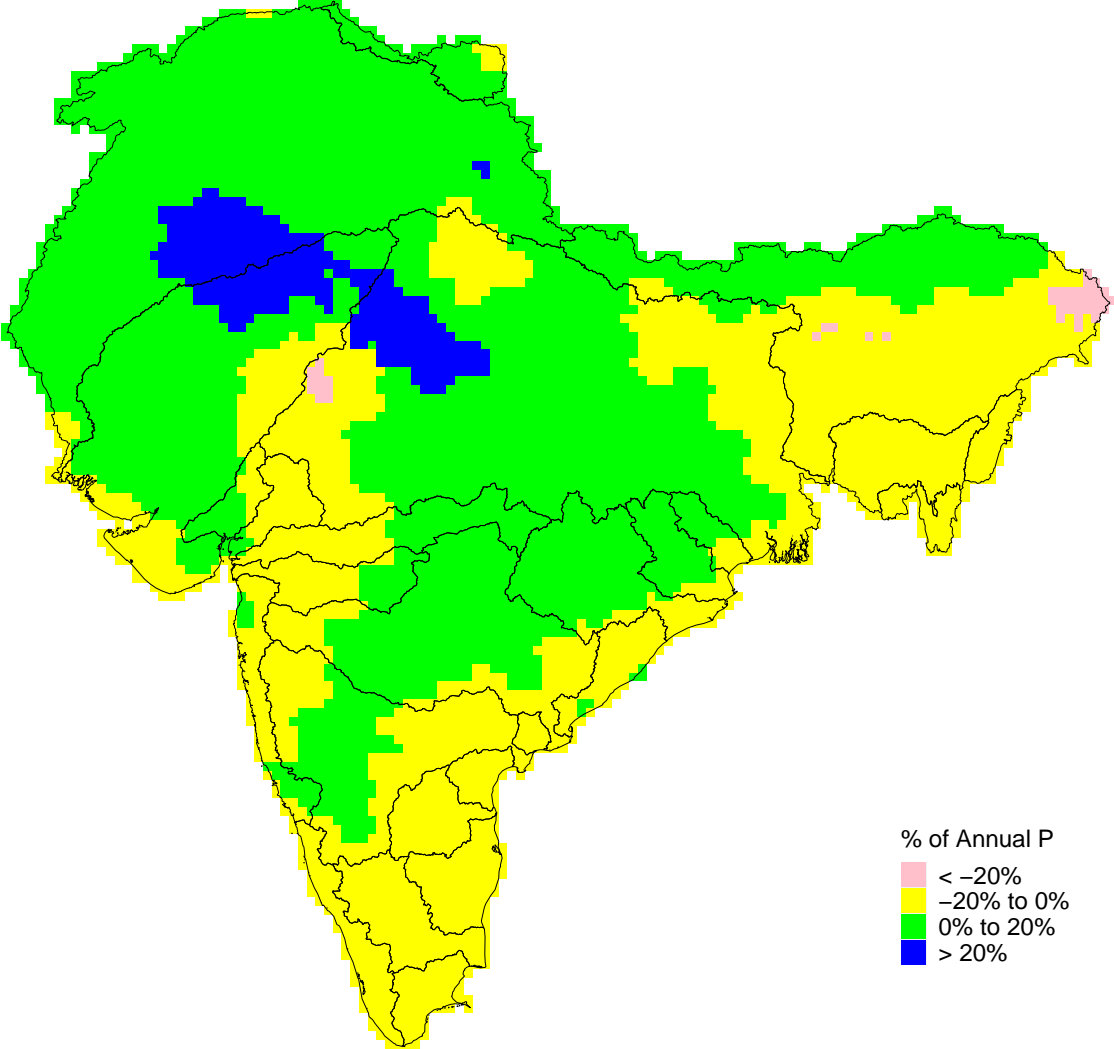

Delta TWS, WY 2009

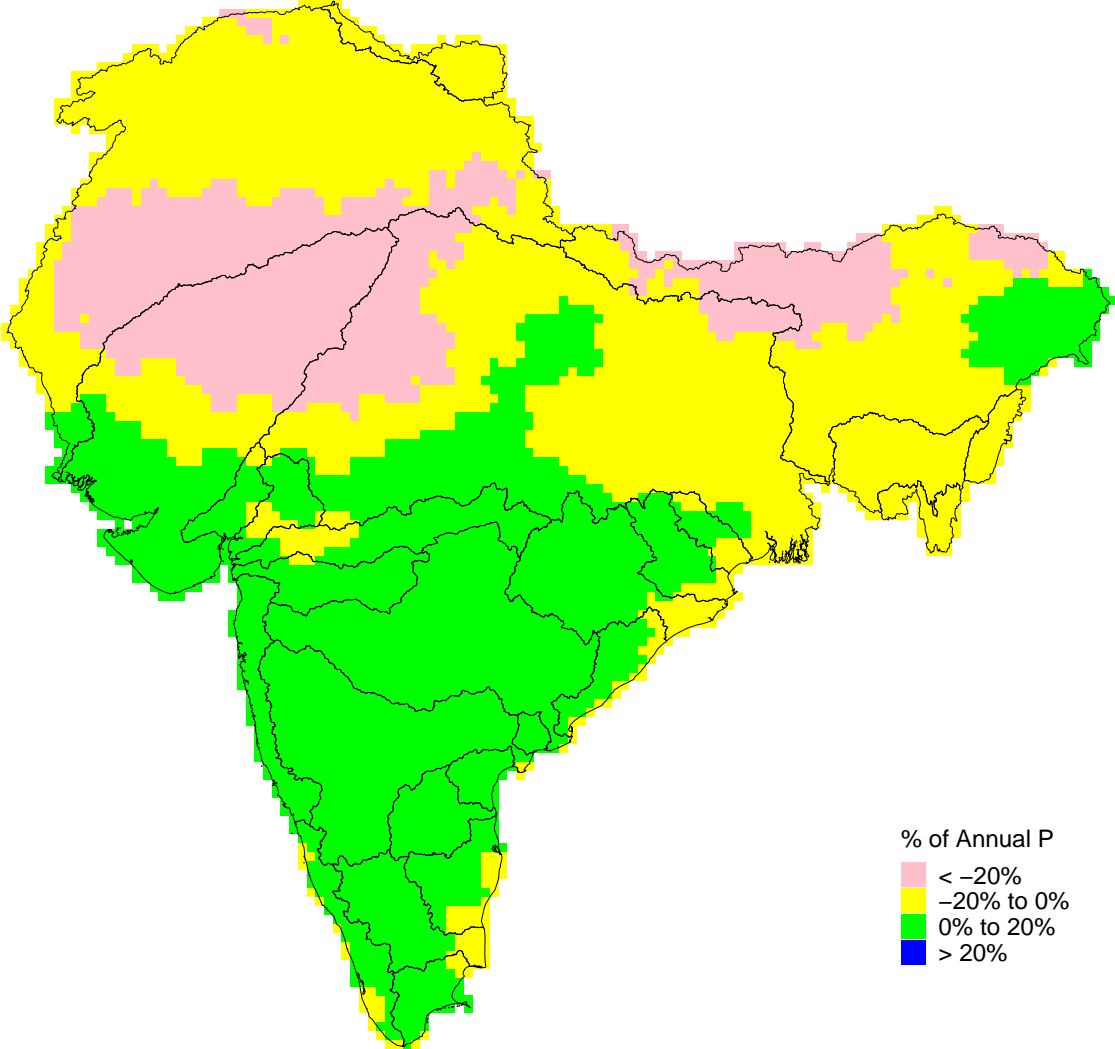

Delta TWS, WY 2010

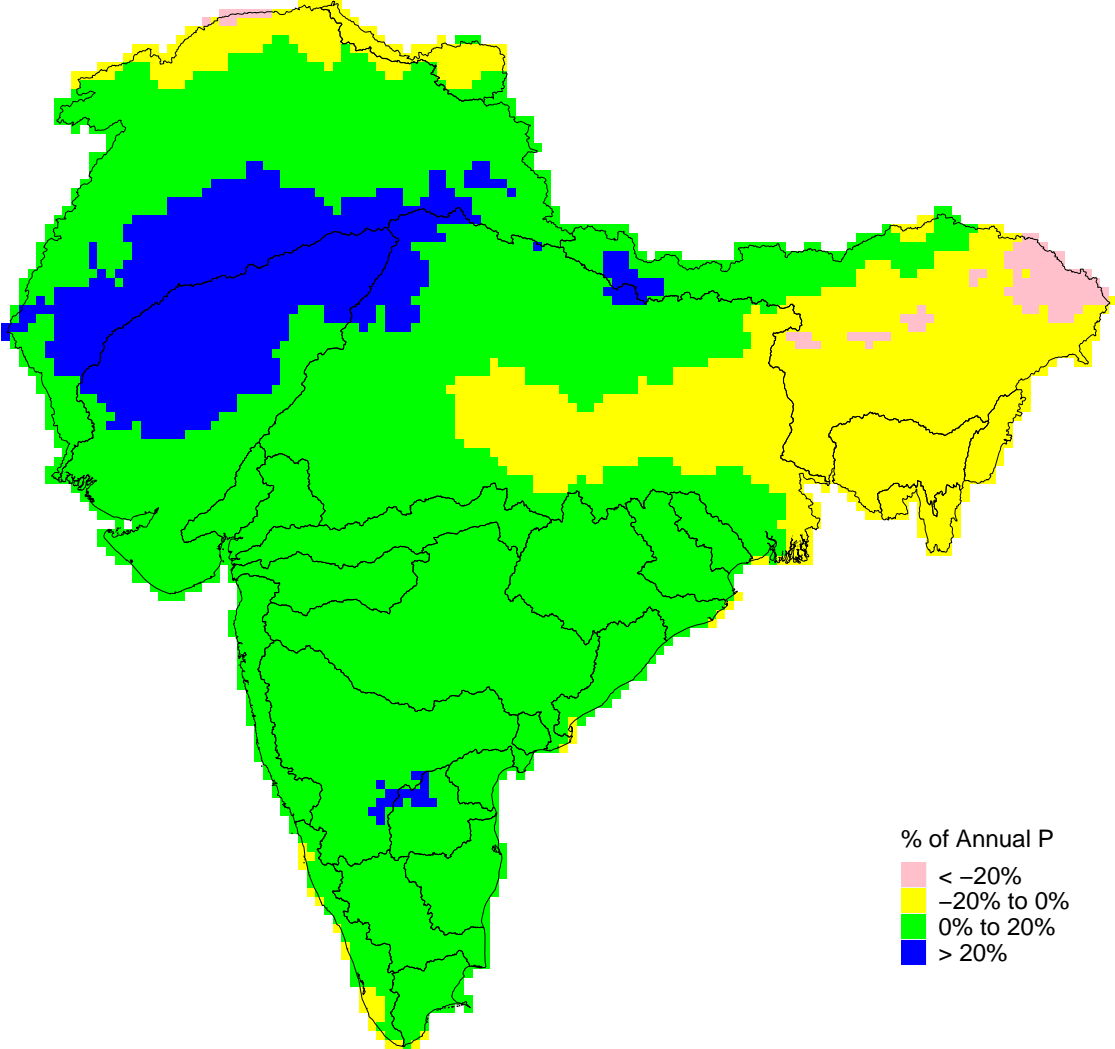

Delta TWS, WY 2012

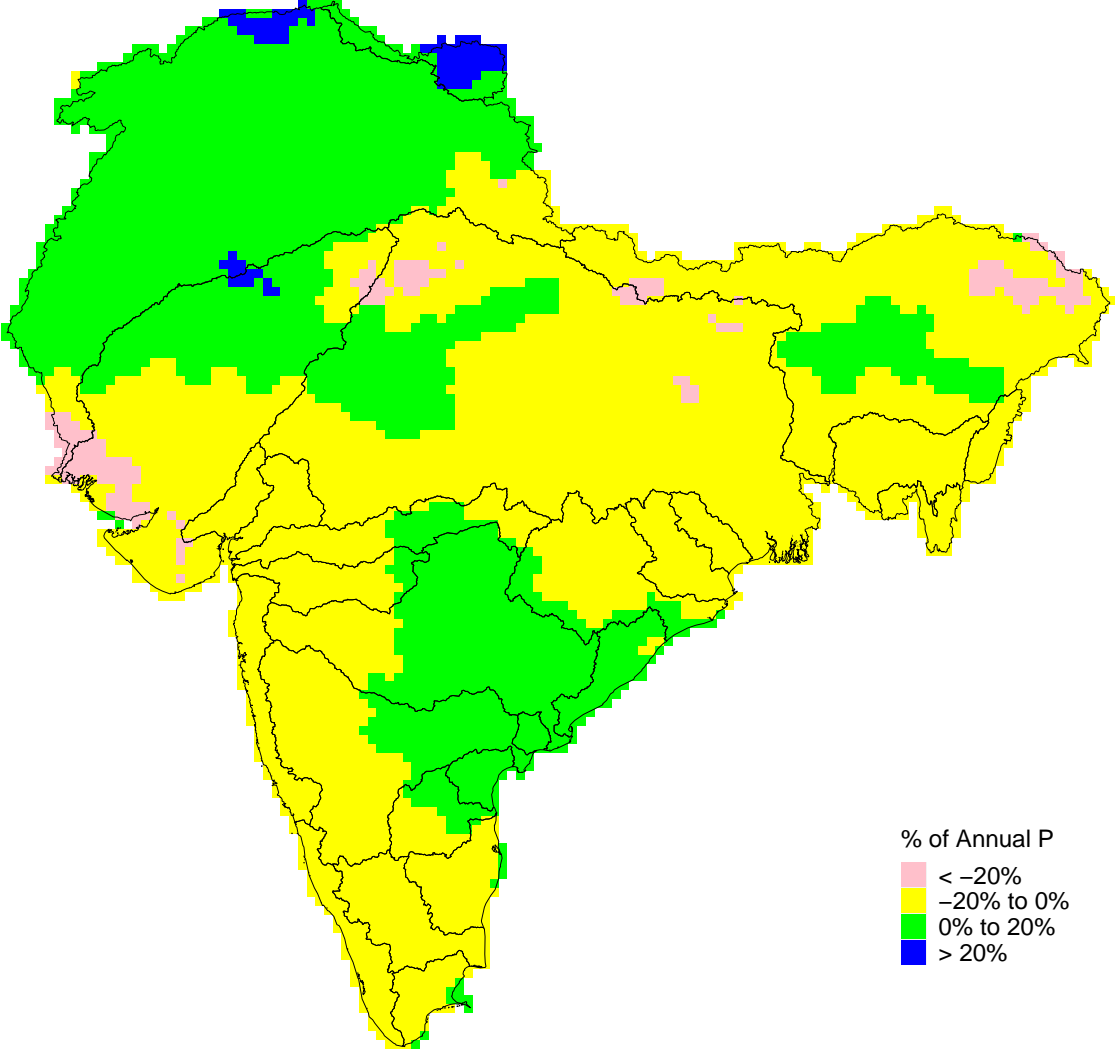

Delta TWS, WY 2013

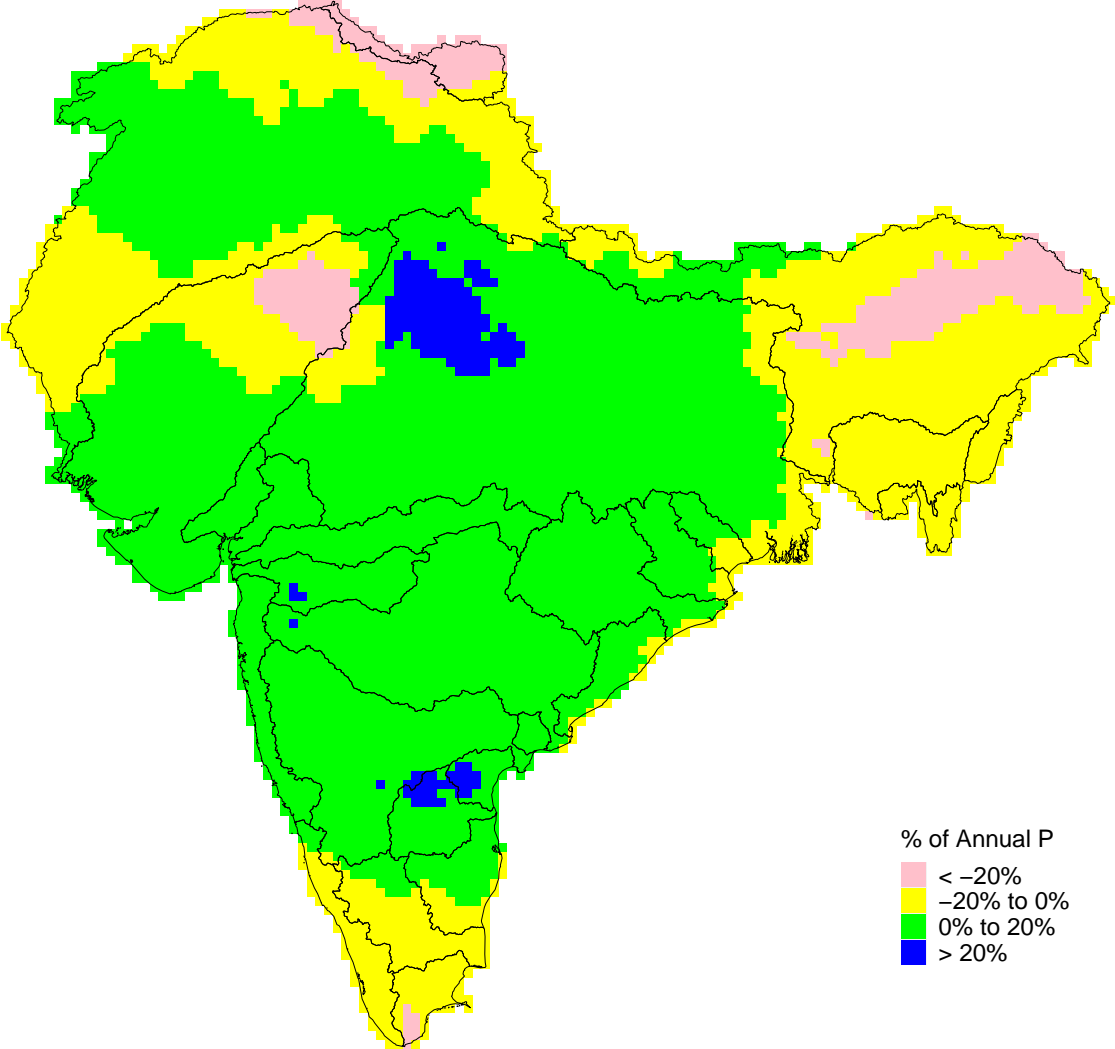

Delta TWS, WY 2014

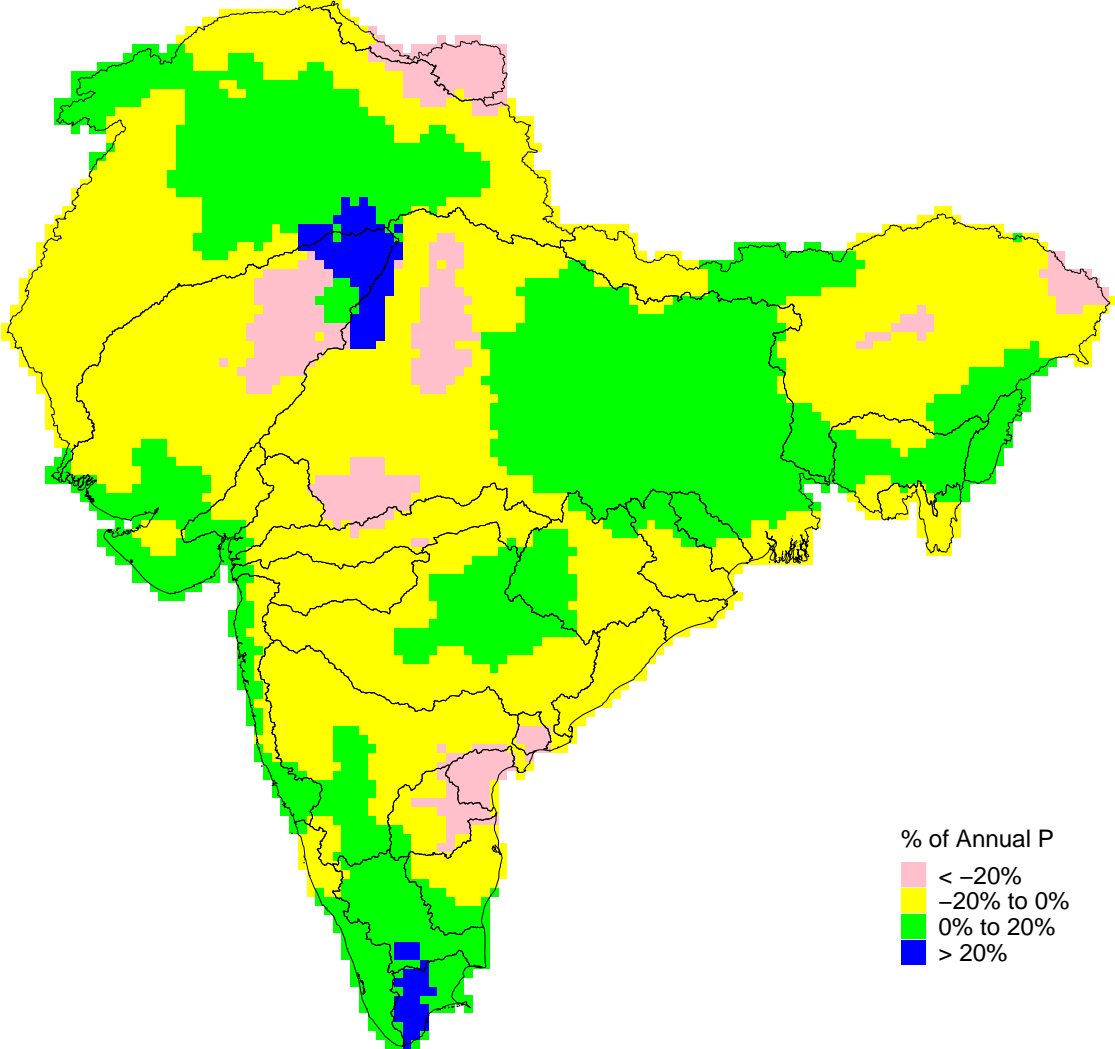



## S7 Spatial Averaging

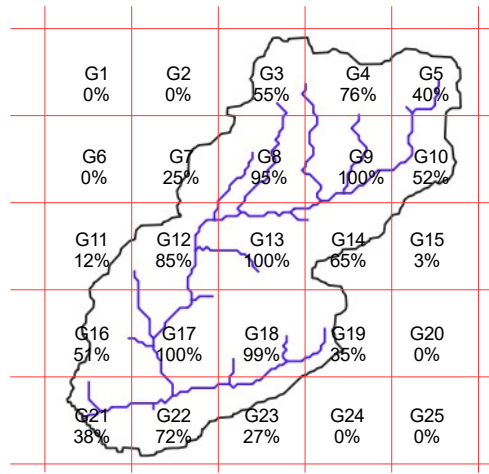

*area-weighted watershed average* =

$$\frac{\sum_{g=1}^{g=25} \text{Variable} \times \text{Area}_g \times \text{Fraction}_g}{\sum_{g=1}^{g=25} \text{Area}_g \times \text{Fraction}_g}$$

Figure S7.1: Schematic illustrating the area-weighted averaging procedure used to obtain watershed-aggregated variables from gridded products. The watershed is shown in black, the river network in blue, and the grid mesh in red. Grids are numbered G1 through G25.

## S8 Case Study on Potential Contribution of Inter-watershed Groundwater Flow (IGF)

In order to demonstrate that inter-watershed groundwater flow (IGF) does not always explain the observed water budget imbalance, a case study is presented here. Annual and monthly water balance of nine select watersheds in Southwestern India are examined (Fig. S8.1). WY 2007 is chosen as an example, and it is one the many years where watershed imbalances were observed. The selected watersheds have been identified in this study to be experiencing  $UoP$  using the IMD-APHRO dataset. These watersheds are part of three major basins (Cauvery, Krishna and WFR South) and their catchment areas range from about 300 to 3,300  $km^2$  (Table S8.1). The combined area of these watersheds is about 11,270  $km^2$ . These watersheds are adjacent to each other, and relative to the surrounding terrain they are located at a higher elevation (Fig. S8.1(c)).

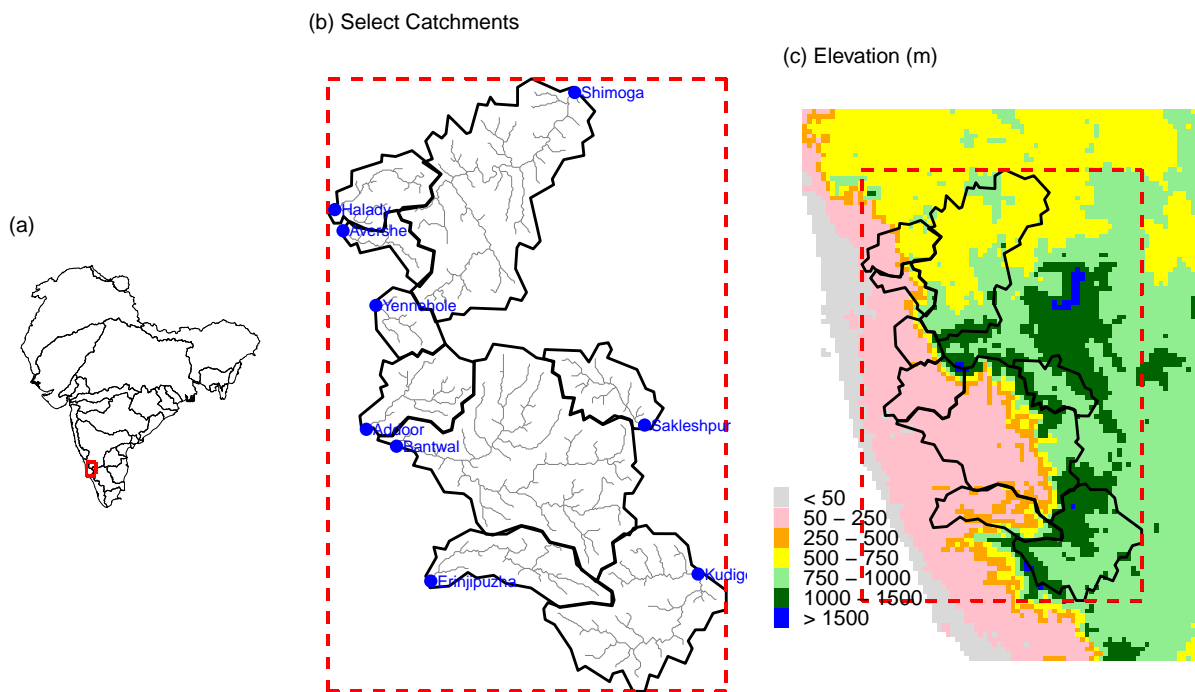

Figure S8.1: Select watersheds analyzed in this case study. (a) Red box shows the location of the nine watersheds within the study domain; (b) streamflow gauging stations (blue dots) at the outlets of the watersheds (black lines) and the river network (grey lines); (c) topography of the select watersheds and the surrounding region.

Table S8.1 shows the annual  $P$ ,  $R$  and  $ET$  for WY 2007 for the nine watersheds. It is evident that the annual runoff coefficient ( $R/P$ ) is at least 0.81, and exceeds 1.0 for five of the nine watersheds. The ratio of  $(R + ET)/P$  ranges from 1.13 to 1.72. Monthly values of  $P$ ,  $R$  and  $ET$  for the monsoon season (June to September) during WY 2007 are shown in Figure S8.2. Except for the smaller watershed of Halady,  $R$  exceeds  $P$  for multiple months

Table S8.1: Annual  $P$ ,  $R$  and  $ET$  (in MCM) for WY 2007 for the watersheds in Fig. S8.1.

| Basin     | Site        | Area ( $km^2$ ) | P (IMD) | R      | ET    | R / P | (R + ET) / P |
|-----------|-------------|-----------------|---------|--------|-------|-------|--------------|
| Cauvery   | Kudige      | 1,742.8         | 3,794   | 3,932  | 1,962 | 1.04  | 1.55         |
| Cauvery   | Sakleshpur  | 615.6           | 1,572   | 2,018  | 681   | 1.28  | 1.72         |
| Krishna   | Shimoga     | 2,761.3         | 8,197   | 7,303  | 3,078 | 0.89  | 1.27         |
| WFR South | Addoor      | 718.7           | 3,217   | 2,612  | 1,017 | 0.81  | 1.13         |
| WFR South | Avershe     | 299.6           | 1,033   | 1,381  | 398   | 1.34  | 1.72         |
| WFR South | Bantwal     | 3,295.4         | 13,058  | 14,952 | 4,432 | 1.15  | 1.48         |
| WFR South | Erinjipuzha | 912.0           | 3,389   | 3,031  | 1,244 | 0.89  | 1.26         |
| WFR South | Halady      | 566.4           | 2,646   | 2,410  | 726   | 0.91  | 1.19         |
| WFR South | Yennehole   | 356.9           | 1,527   | 1,535  | 510   | 1.01  | 1.34         |

during the monsoon season. Thus, these watersheds are simultaneously experiencing the water imbalance scenarios of  $P \leq R$  or  $P \ll R + ET$ . The temporal pattern of  $P$  and  $R$  is generally similar across the watersheds - with July being the month of largest  $P$  and  $R$ .

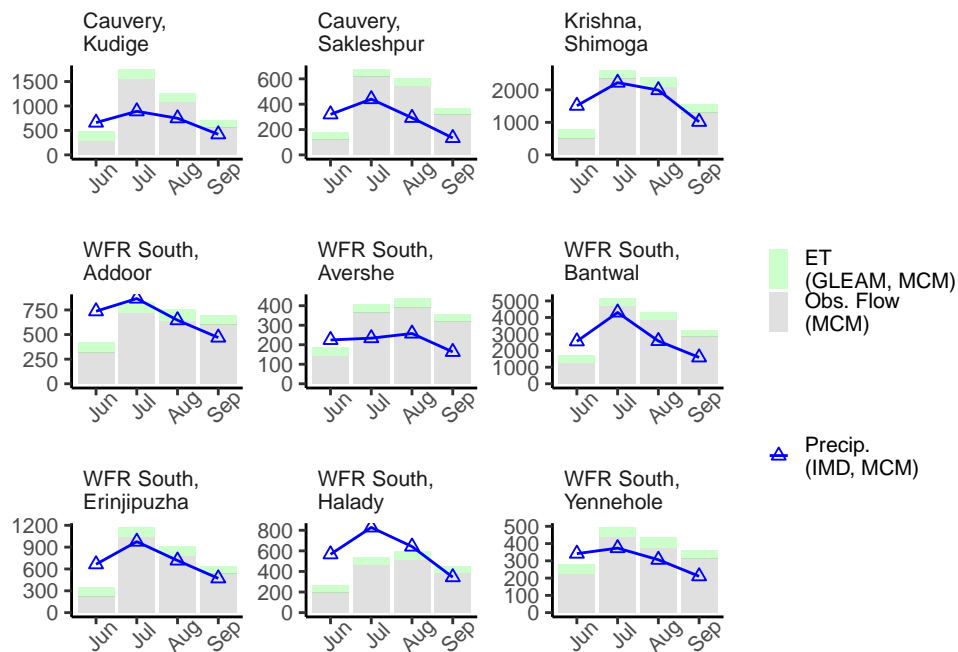

Figure S8.2: Monthly  $P$ ,  $ET$  and  $R$  (in MCM) for WY 2007 for the watersheds in Fig. S8.1. Only the months of the monsoon season, June-September, are shown.

It is not known if, and to what extent, IGF is present within these watersheds. The possibility of IGF causing the observed spuriously high runoff coefficients is examined here. If IGF is present in this region, groundwater can flow between these watersheds and (or) can flow into these watersheds from the adjacent terrain.

In case of flow between the watersheds, some of them would be losing streamflow, while the others would be gaining streamflow. Under such circumstances, some watersheds would have lower runoff coefficients while others would have higher coefficients. One would not see

the simultaneous occurrence of monthly runoff coefficients greater than 1.0 across most of the watersheds, such as those during the months of July and August (Figure S8.2). This simultaneous occurrence of high monthly runoff coefficients also happens in other years (but is not shown here). Thus, it appears that IGF between the watersheds is unlikely the cause of observed watershed imbalance.

IGF from the surrounding terrain into these watersheds is unlikely since these watersheds are at a relatively higher elevation (Fig. S8.1(c)). Groundwater from lower elevations would have to flow against gravity in order to reach these watersheds at higher elevations. Thus, it appears that IGF from the surrounding terrain is unlikely the cause of observed watershed imbalance.

Based on the above discussion, it is reasonable to say that IGF is not the predominant cause of the observed water imbalance in the above watersheds. However, the reader should note that IGF can still be present. Only field data can truly reveal the pattern of groundwater flow occurring under these watersheds and the extent of its contribution to streamflow. The above analysis was not performed in other parts of the study domain because of data limitations - inadequate monthly streamflow and the non-contiguous nature of imbalanced watersheds.

## S9 Effect of different heuristics on Scenario II

Scenario II: 0.60, 1.10

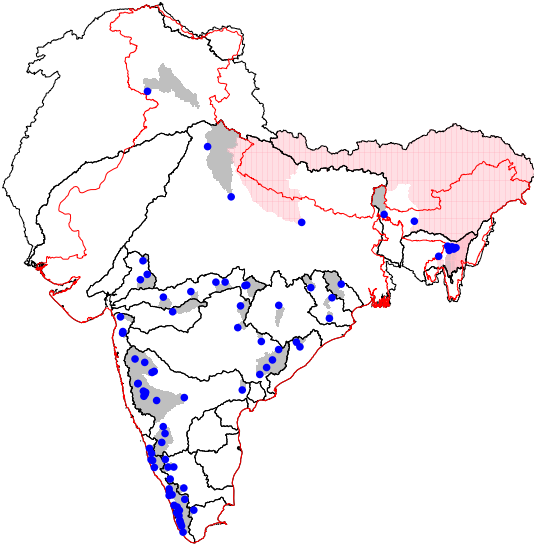

Scenario II: 0.70, 1.20

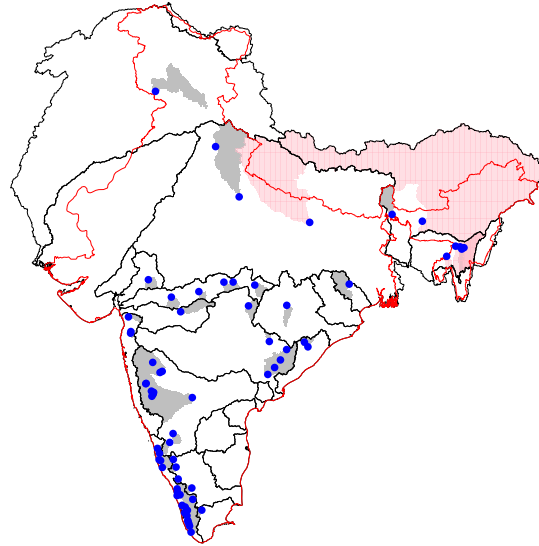

Scenario II: 0.80, 1.30

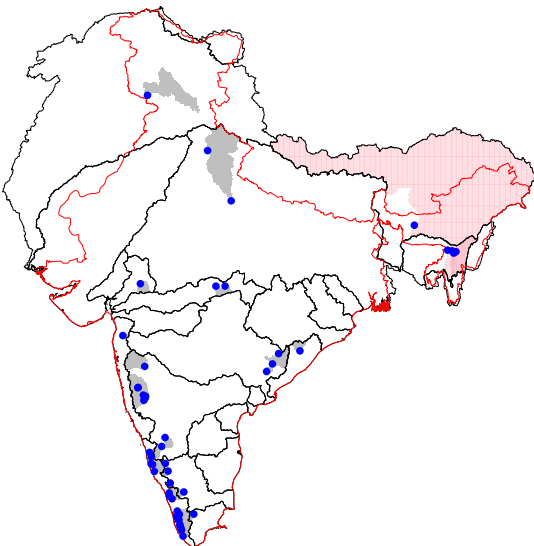

Scenario II: 0.90, 1.40

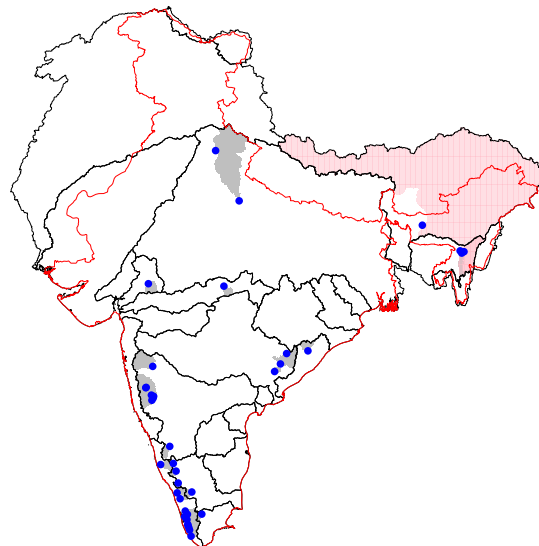

Figure S9.1: Watersheds where Scenario II is realized when using different sets of heuristics.

Table S9.1: Same as Table 3 in the paper, except for heuristics of 0.60 and 1.10 in Scenario II.

| Product   | North India |            |             |              | Peninsular India |            |             |              |
|-----------|-------------|------------|-------------|--------------|------------------|------------|-------------|--------------|
|           | Total       | Scenario I | Scenario II | % Imbalanced | Total            | Scenario I | Scenario II | % Imbalanced |
| APHRO     | 782         | 92         | 112         | 26.1%        | 5,788            | 349        | 624         | 16.8%        |
| CHIRPS    | 782         | 76         | 62          | 17.6%        | 6,036            | 306        | 515         | 13.6%        |
| CMORPH    | 436         | 61         | 63          | 28.4%        | 3,493            | 315        | 281         | 17.1%        |
| ERA5      | 782         | 7          | 91          | 12.5%        | 6,153            | 245        | 489         | 11.9%        |
| GSMAP     | 382         | 76         | 52          | 33.5%        | 3,132            | 441        | 222         | 21.2%        |
| IMD-APHRO | 782         | 32         | 104         | 17.4%        | 6,153            | 414        | 542         | 15.5%        |
| IMDAA     | 782         | 8          | 24          | 4.1%         | 6,153            | 179        | 434         | 10.0%        |
| IMERG     | 382         | 19         | 39          | 15.2%        | 3,132            | 169        | 264         | 13.8%        |
| MSWEP     | 782         | 60         | 95          | 19.8%        | 6,153            | 122        | 361         | 7.8%         |
| PERSIANN  | 782         | 89         | 93          | 23.3%        | 5,796            | 767        | 407         | 20.3%        |
| SM2RAIN   | 195         | 9          | 24          | 16.9%        | 1,784            | 116        | 132         | 13.9%        |
| TERRA     | 782         | 75         | 98          | 22.1%        | 6,153            | 153        | 451         | 9.8%         |

Table S9.2: Same as Table 3 in the paper, except for heuristics of 0.80 and 1.30 in Scenario II.

| Product   | North India |            |             |              | Peninsular India |            |             |              |
|-----------|-------------|------------|-------------|--------------|------------------|------------|-------------|--------------|
|           | Total       | Scenario I | Scenario II | % Imbalanced | Total            | Scenario I | Scenario II | % Imbalanced |
| APHRO     | 782         | 92         | 40          | 16.9%        | 5,788            | 349        | 203         | 9.5%         |
| CHIRPS    | 782         | 76         | 25          | 12.9%        | 6,036            | 306        | 150         | 7.5%         |
| CMORPH    | 436         | 61         | 18          | 18.1%        | 3,493            | 315        | 113         | 12.2%        |
| ERA5      | 782         | 7          | 16          | 2.9%         | 6,153            | 245        | 139         | 6.2%         |
| GSMAP     | 382         | 76         | 27          | 27.0%        | 3,132            | 441        | 84          | 16.8%        |
| IMD-APHRO | 782         | 32         | 28          | 7.7%         | 6,153            | 414        | 206         | 10.1%        |
| IMDAA     | 782         | 8          | 4           | 1.5%         | 6,153            | 179        | 102         | 4.6%         |
| IMERG     | 382         | 19         | 7           | 6.8%         | 3,132            | 169        | 83          | 8.1%         |
| MSWEP     | 782         | 60         | 23          | 10.6%        | 6,153            | 122        | 89          | 3.4%         |
| PERSIANN  | 782         | 89         | 43          | 16.9%        | 5,796            | 767        | 157         | 15.9%        |
| SM2RAIN   | 195         | 9          | 7           | 8.2%         | 1,784            | 116        | 39          | 8.7%         |
| TERRA     | 782         | 75         | 29          | 13.3%        | 6,153            | 153        | 102         | 4.1%         |

Table S9.3: Same as Table 3 in the paper, except for heuristics of 0.90 and 1.40 in Scenario II.

| Product   | North India |            |             |              | Peninsular India |            |             |              |
|-----------|-------------|------------|-------------|--------------|------------------|------------|-------------|--------------|
|           | Total       | Scenario I | Scenario II | % Imbalanced | Total            | Scenario I | Scenario II | % Imbalanced |
| APHRO     | 782         | 92         | 15          | 13.7%        | 5,788            | 349        | 79          | 7.4%         |
| CHIRPS    | 782         | 76         | 9           | 10.9%        | 6,036            | 306        | 44          | 5.8%         |
| CMORPH    | 436         | 61         | 6           | 15.4%        | 3,493            | 315        | 46          | 10.3%        |
| ERA5      | 782         | 7          | 2           | 1.1%         | 6,153            | 245        | 35          | 4.5%         |
| GSMAP     | 382         | 76         | 14          | 23.6%        | 3,132            | 441        | 37          | 15.3%        |
| IMD-APHRO | 782         | 32         | 11          | 5.5%         | 6,153            | 414        | 80          | 8.0%         |
| IMDAA     | 782         | 8          | 1           | 1.1%         | 6,153            | 179        | 30          | 3.4%         |
| IMERG     | 382         | 19         | 1           | 5.2%         | 3,132            | 169        | 34          | 6.5%         |
| MSWEP     | 782         | 60         | 10          | 8.9%         | 6,153            | 122        | 33          | 2.5%         |
| PERSIANN  | 782         | 89         | 17          | 13.6%        | 5,796            | 767        | 64          | 14.3%        |
| SM2RAIN   | 195         | 9          | 1           | 5.1%         | 1,784            | 116        | 19          | 7.6%         |
| TERRA     | 782         | 75         | 13          | 11.2%        | 6,153            | 153        | 32          | 3.0%         |

# S10 Time series charts

Annual (Jun–May), Station: Kudige, River: Cauvery  
 GHI ID: cauv\_kudig, Catch. Area: 1743 sq. km

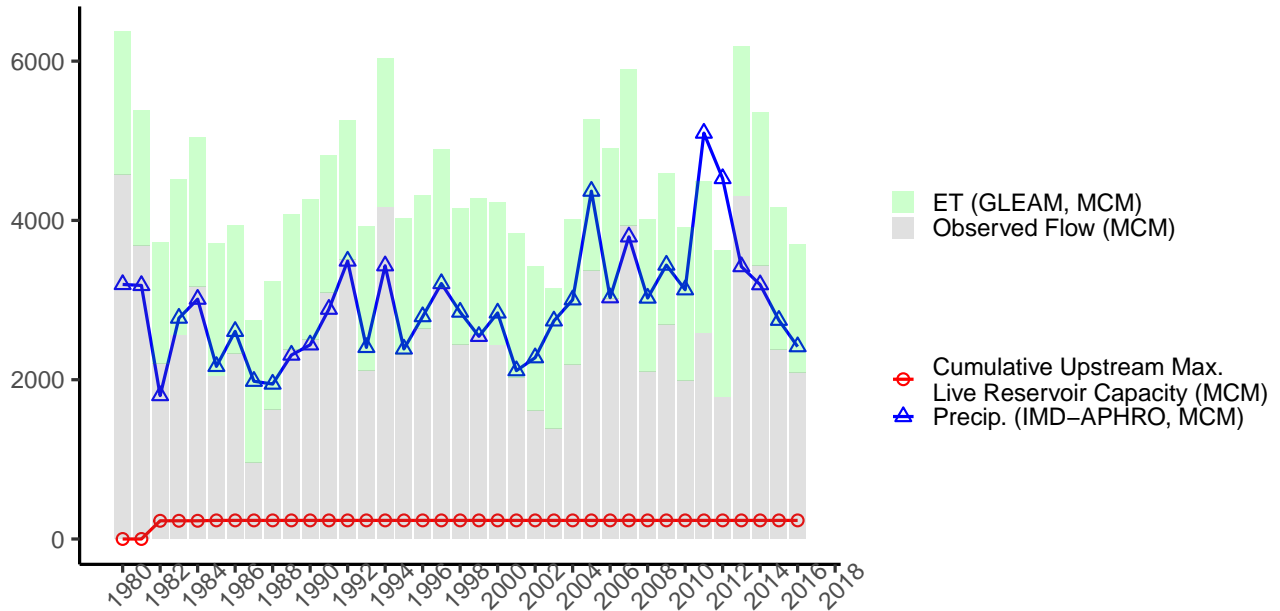

Monsoon (Jun–Sep), Station: Kudige, River: Cauvery  
 GHI ID: cauv\_kudig, Catch. Area: 1743 sq. km

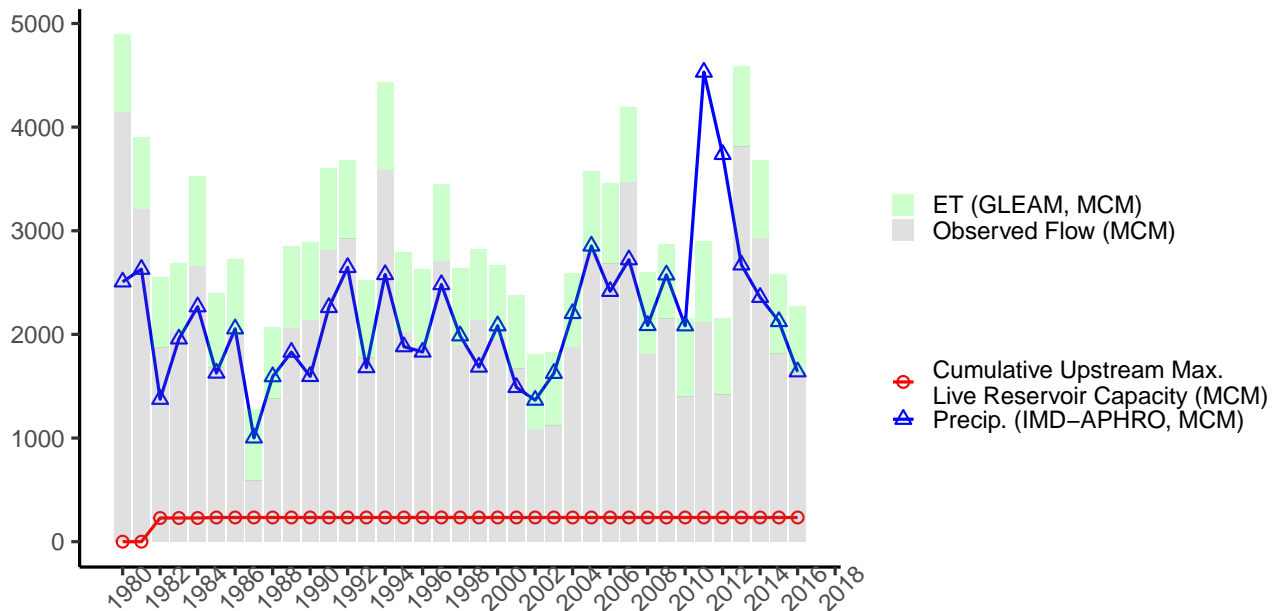



Annual (Jun–May), Station: Muthankera, River: Cauvery/Kabini  
 GHI ID: cauv\_mutha, Catch. Area: 1235 sq. km

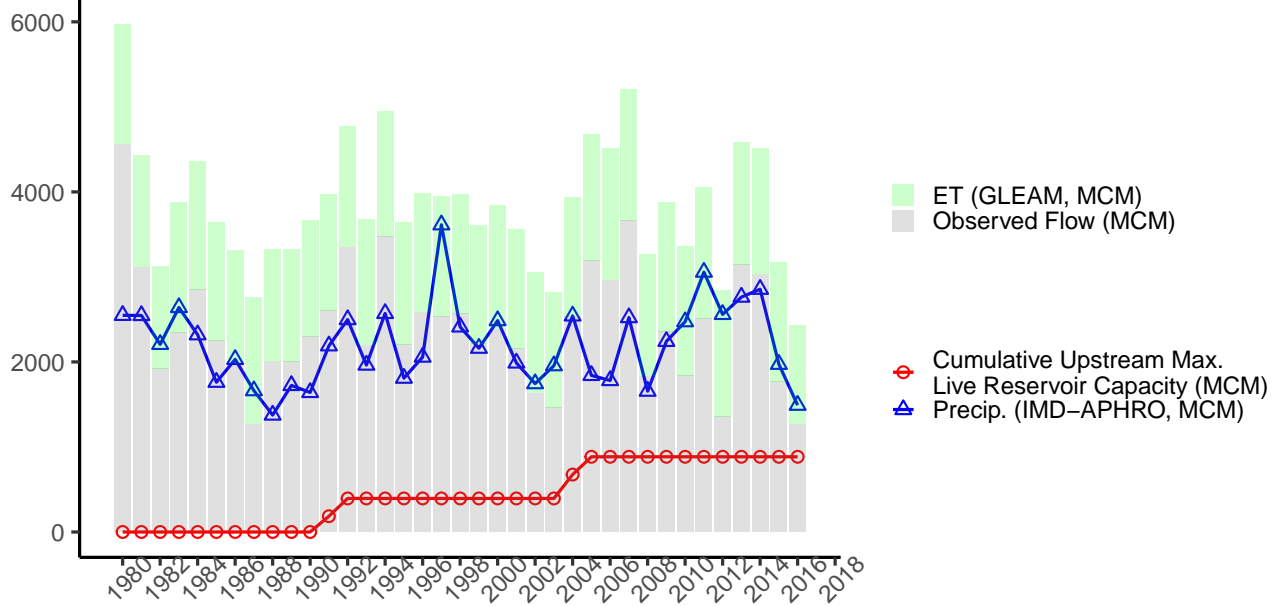

Monsoon (Jun–Sep), Station: Muthankera, River: Cauvery/Kabini  
 GHI ID: cauv\_mutha, Catch. Area: 1235 sq. km

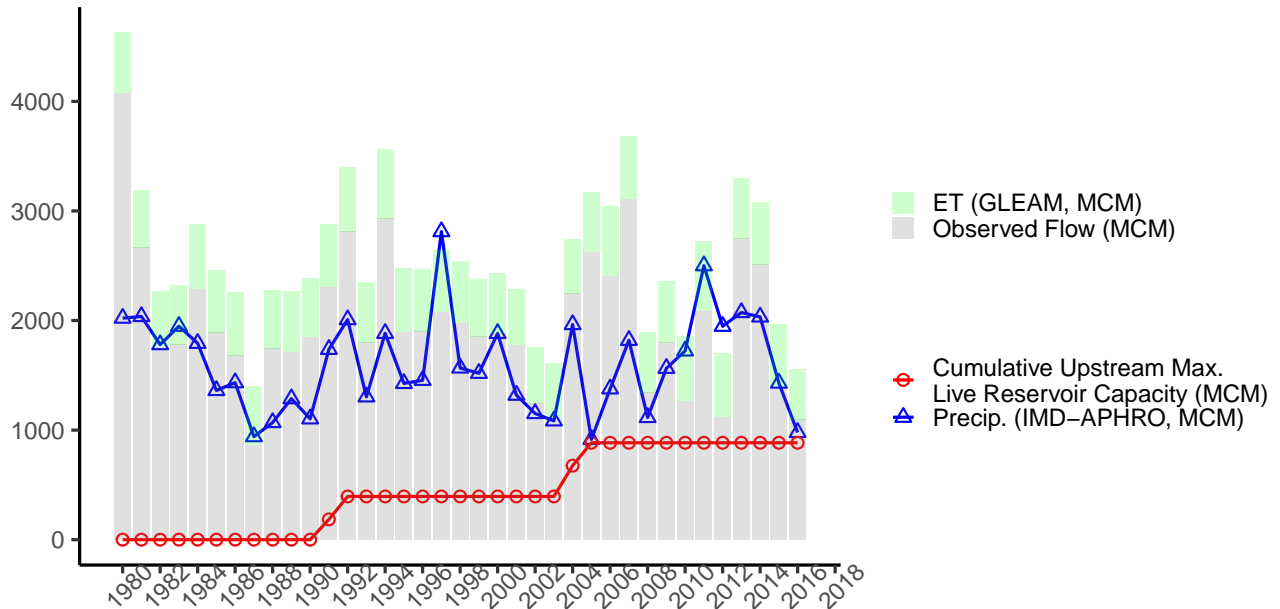

Annual (Jun–May), Station: Nellithurai, River: Cauvery/Bhavani  
 GHI ID: cauv\_nelli, Catch. Area: 1499 sq. km

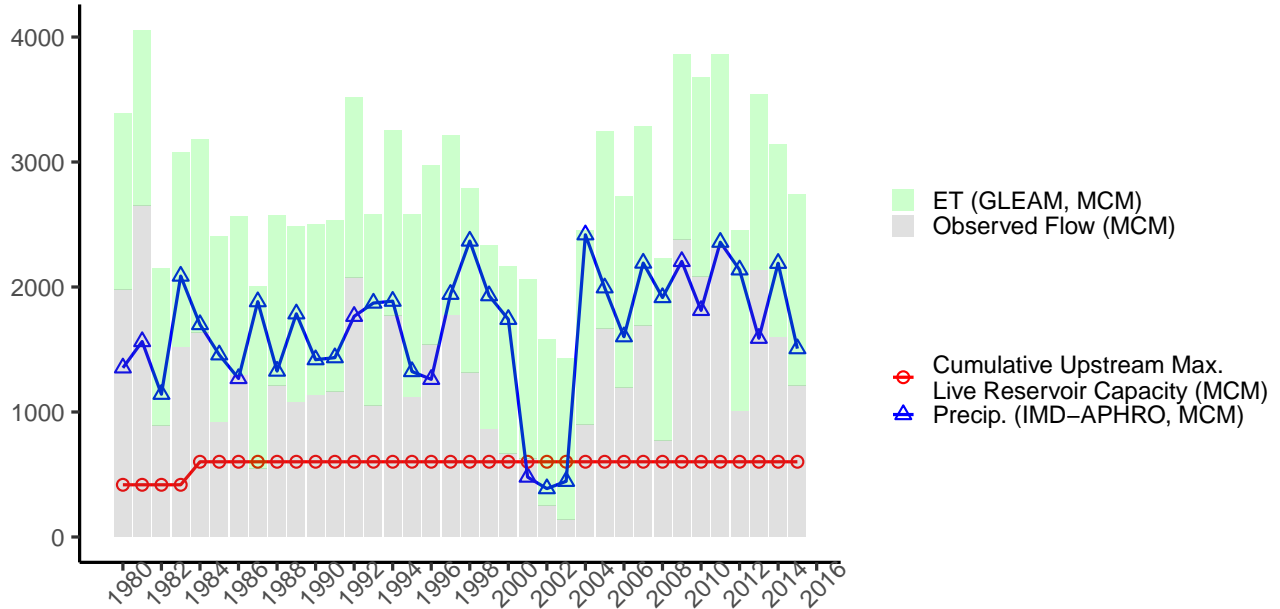

Monsoon (Jun–Sep), Station: Nellithurai, River: Cauvery/Bhavani  
 GHI ID: cauv\_nelli, Catch. Area: 1499 sq. km

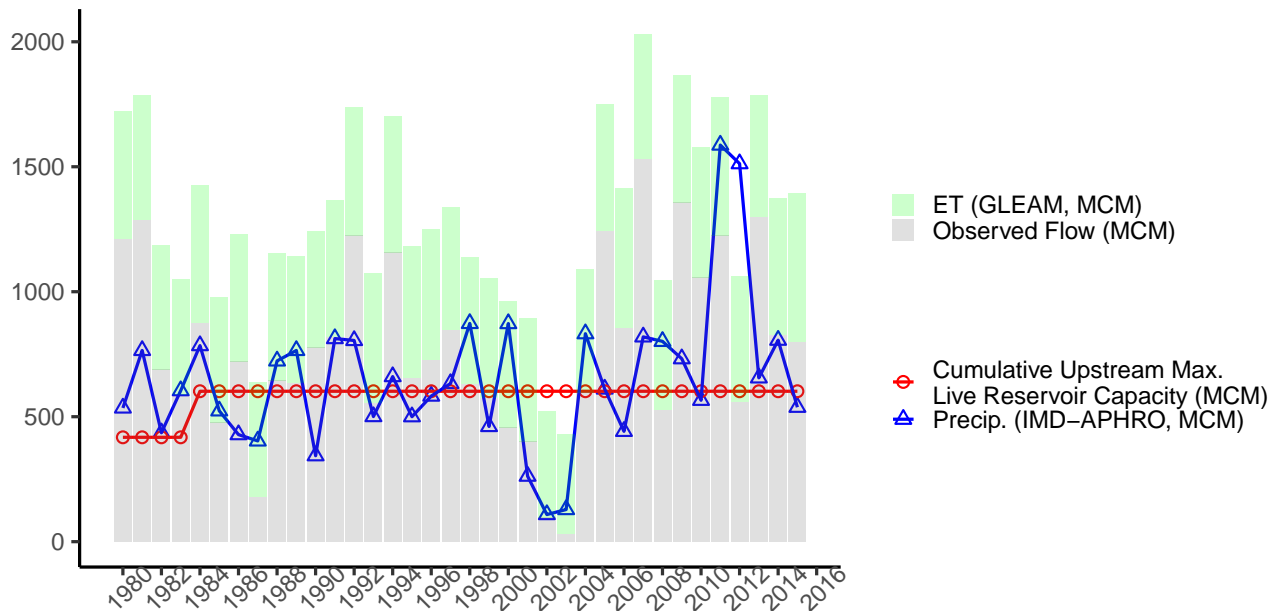

Annual (Jun–May), Station: Sakleshpur, River: Cauvery/Hemavati  
 GHI ID: cauv\_sakle, Catch. Area: 616 sq. km

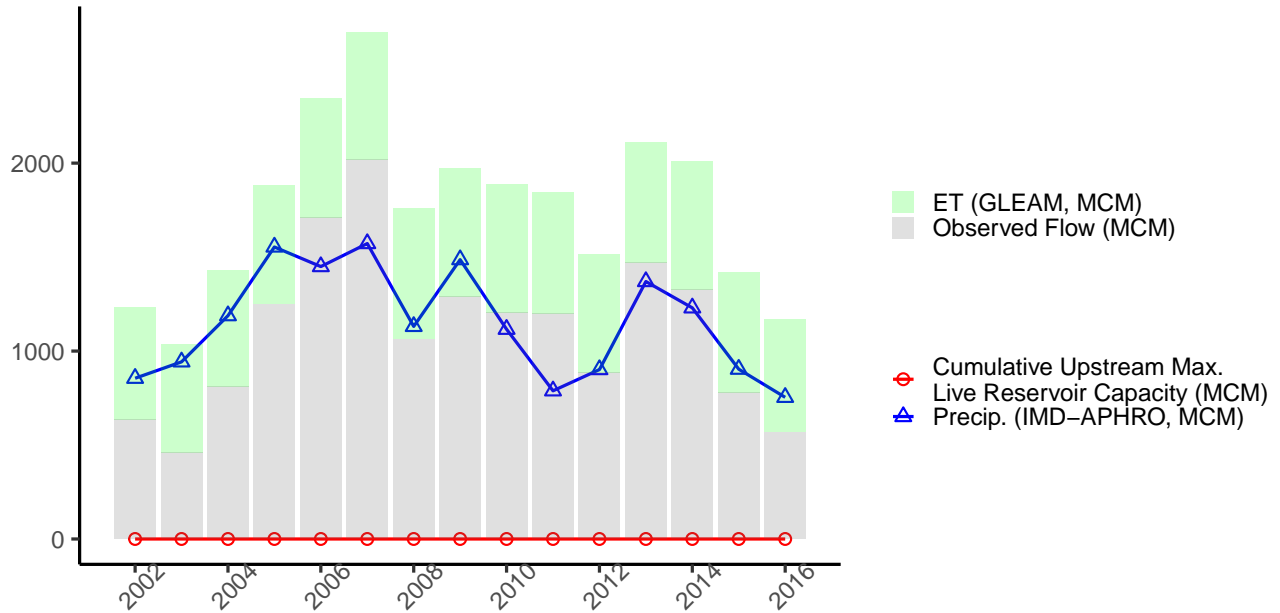

Monsoon (Jun–Sep), Station: Sakleshpur, River: Cauvery/Hemavati  
 GHI ID: cauv\_sakle, Catch. Area: 616 sq. km

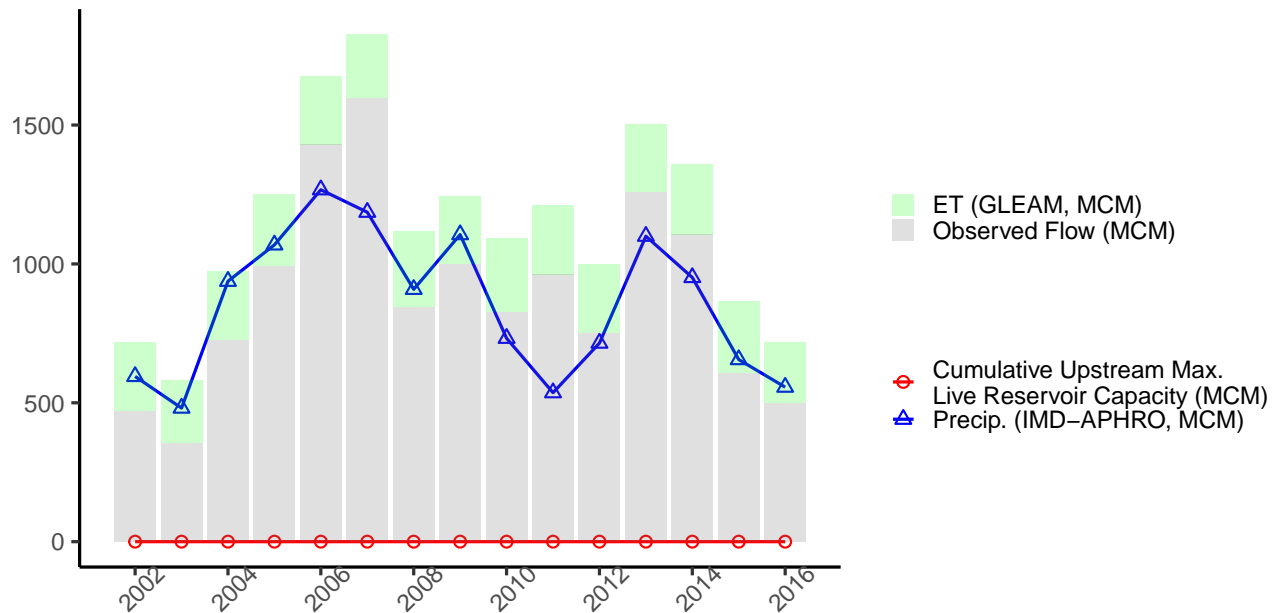

Annual (Jun–May), Station: Gudari, River: Vamsadhara  
 GHI ID: efrn\_gudar, Catch. Area: 3147 sq. km

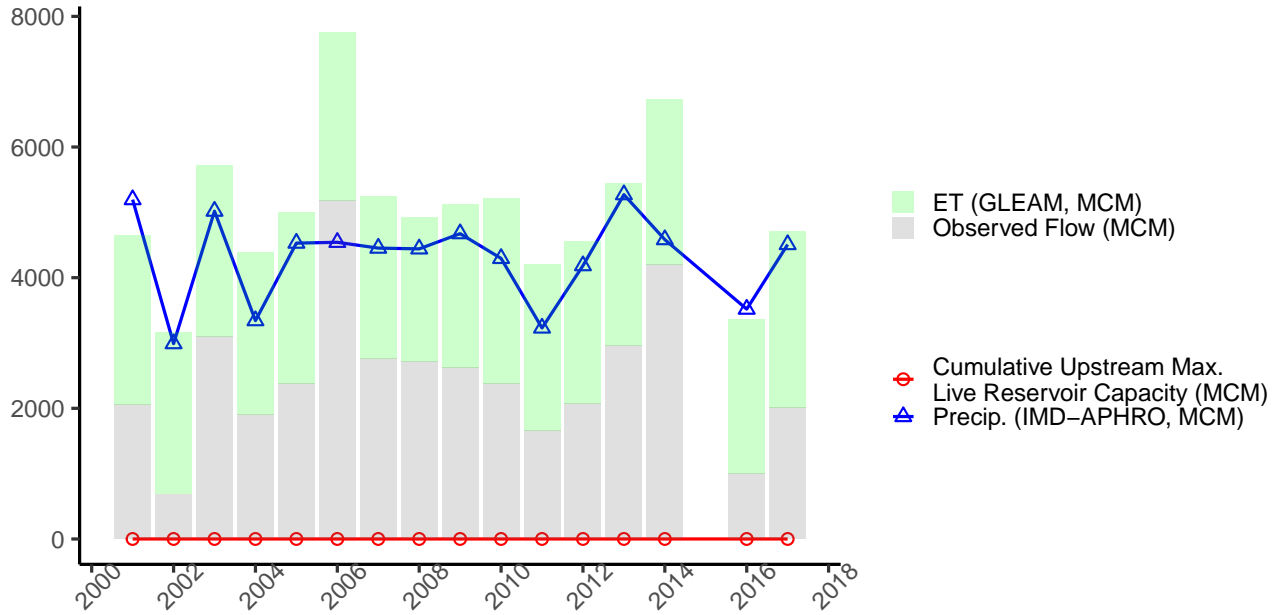

Monsoon (Jun–Sep), Station: Gudari, River: Vamsadhara  
 GHI ID: efrn\_gudar, Catch. Area: 3147 sq. km

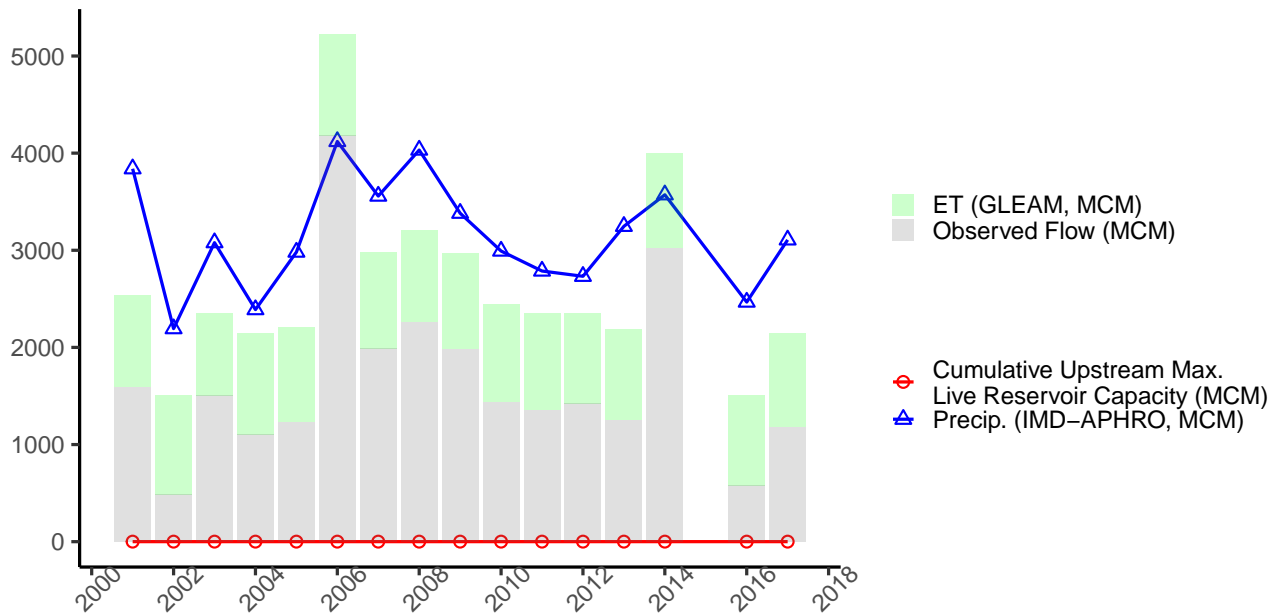

Annual (Jun–May), Station: Kutragada, River: Vamsadhara  
 GHI ID: efrn\_kutra, Catch. Area: 1080 sq. km

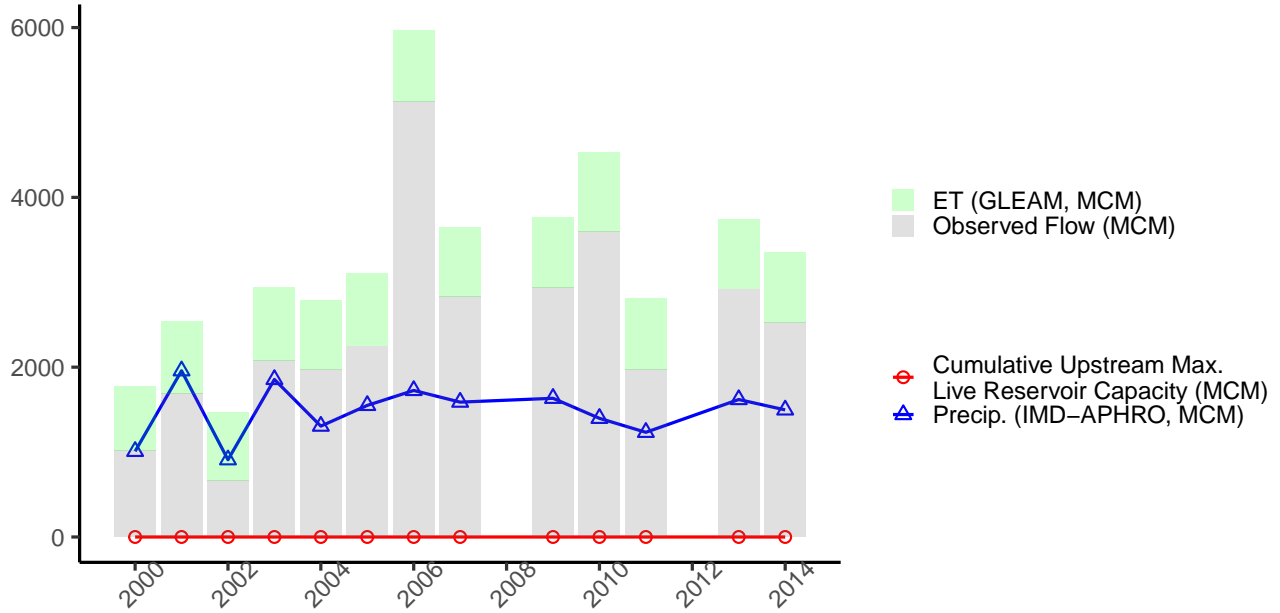

Monsoon (Jun–Sep), Station: Kutragada, River: Vamsadhara  
 GHI ID: efrn\_kutra, Catch. Area: 1080 sq. km

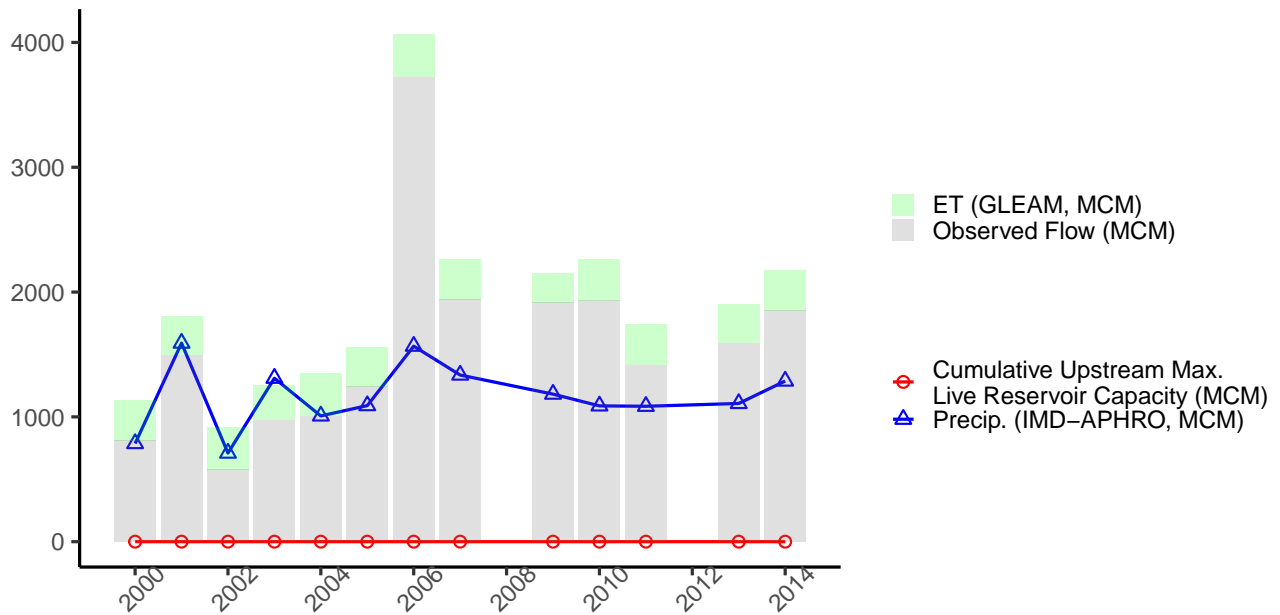

Annual (Jun–May), Station: Theni, River: Vaigai/Suruliar  
 GHI ID: efrs\_theni, Catch. Area: 1364 sq. km

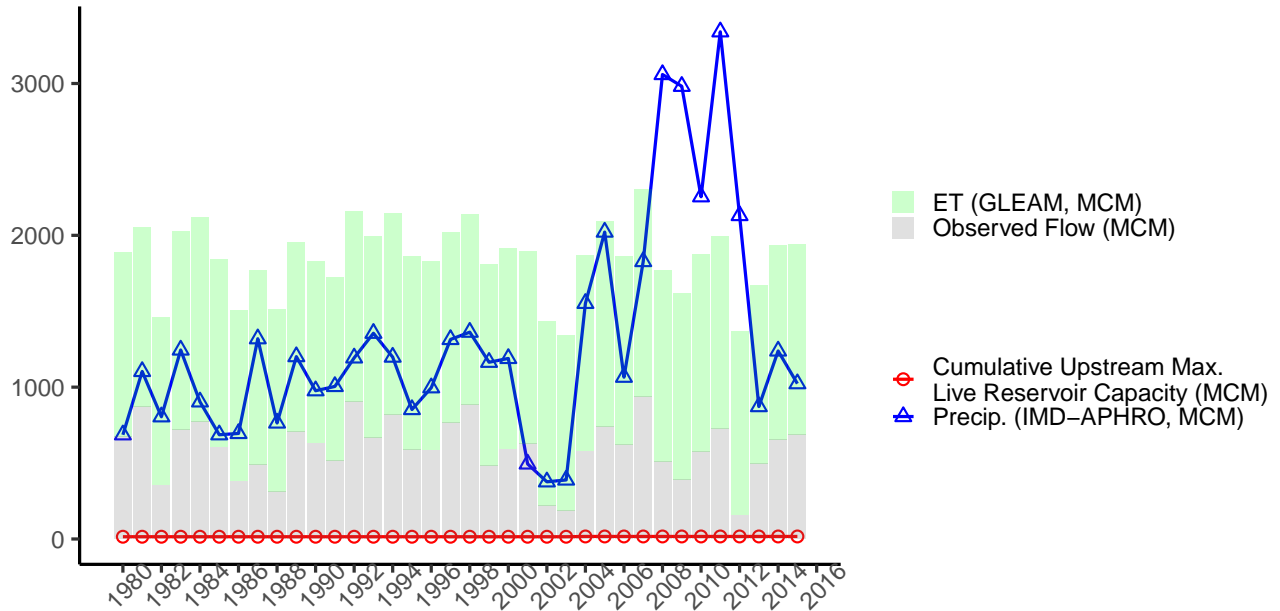

Monsoon (Jun–Sep), Station: Theni, River: Vaigai/Suruliar  
 GHI ID: efrs\_theni, Catch. Area: 1364 sq. km

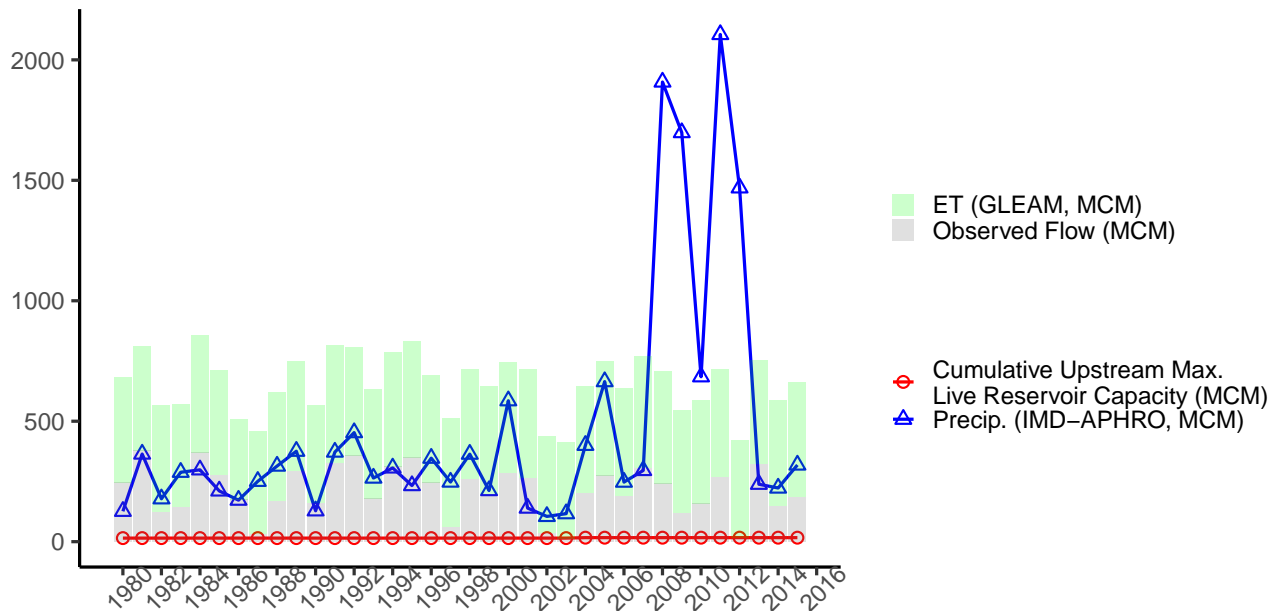

Annual (Jun–May), Station: Domohani, River: Brahmaputra/Teesta  
GHI ID: gbm\_x\_domoh, Catch. Area: 9648 sq. km

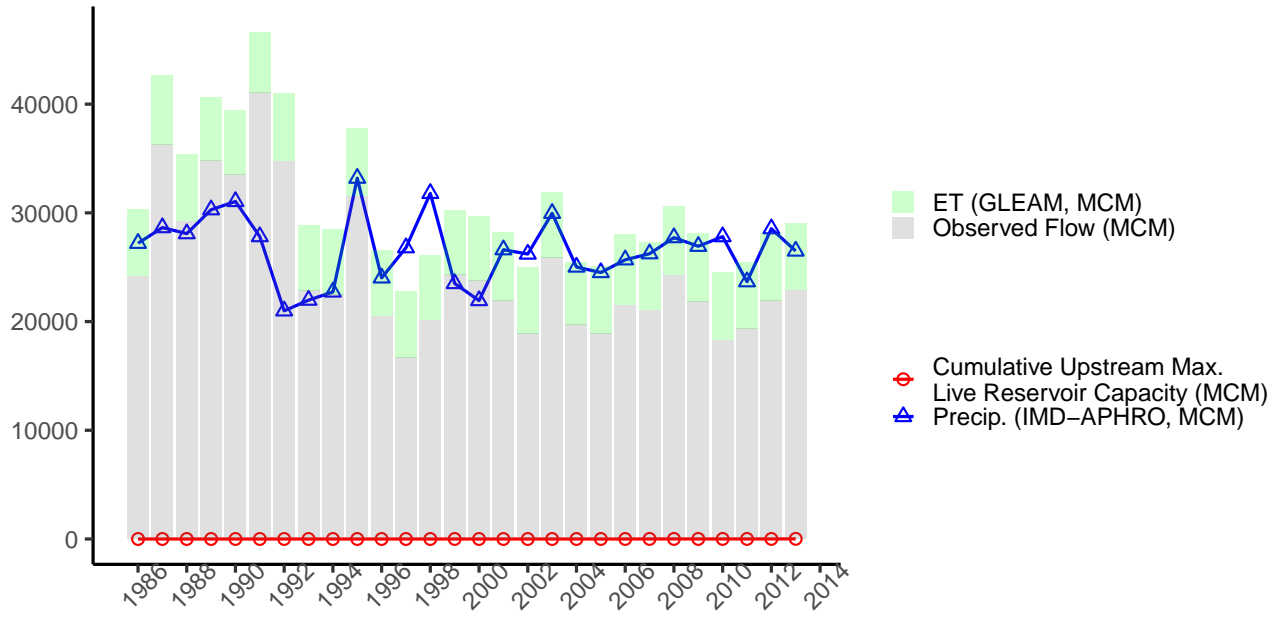

Annual (Jun–May), Station: Rishikesh, River: Ganga  
GHI ID: gbm\_x\_rishi, Catch. Area: 21897 sq. km

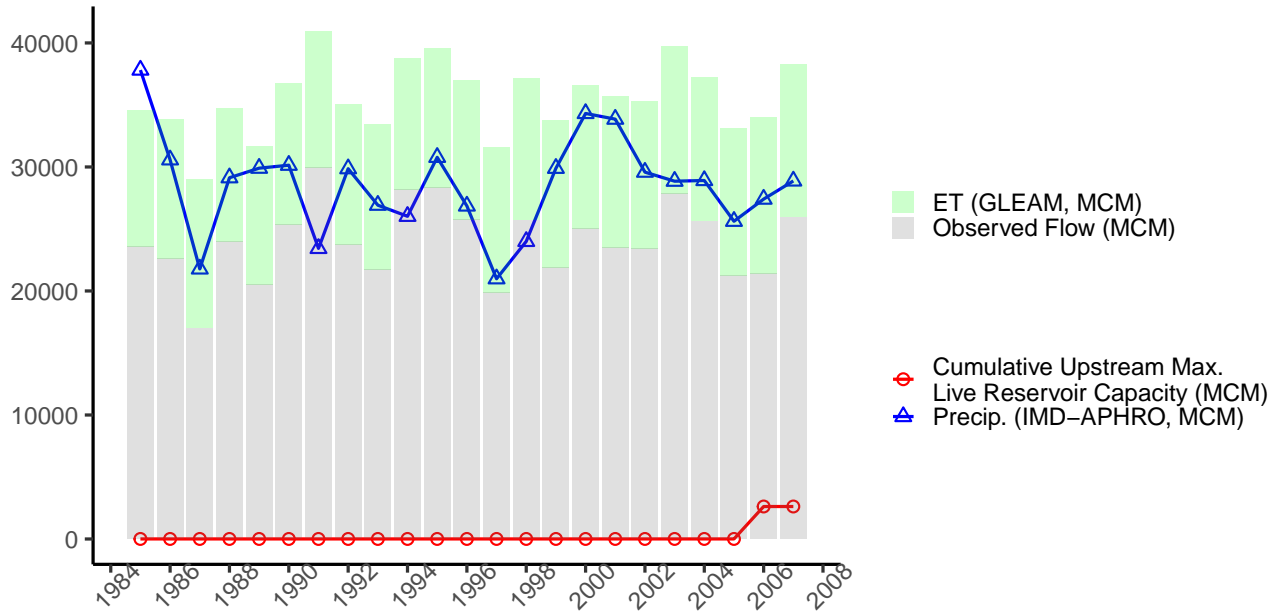



Annual (Jun–May), Station: Potteru (Seasonal), River: Godavari/Sabari/Potteru Vagu  
 GHI ID: goda\_potte, Catch. Area: 1175 sq. km

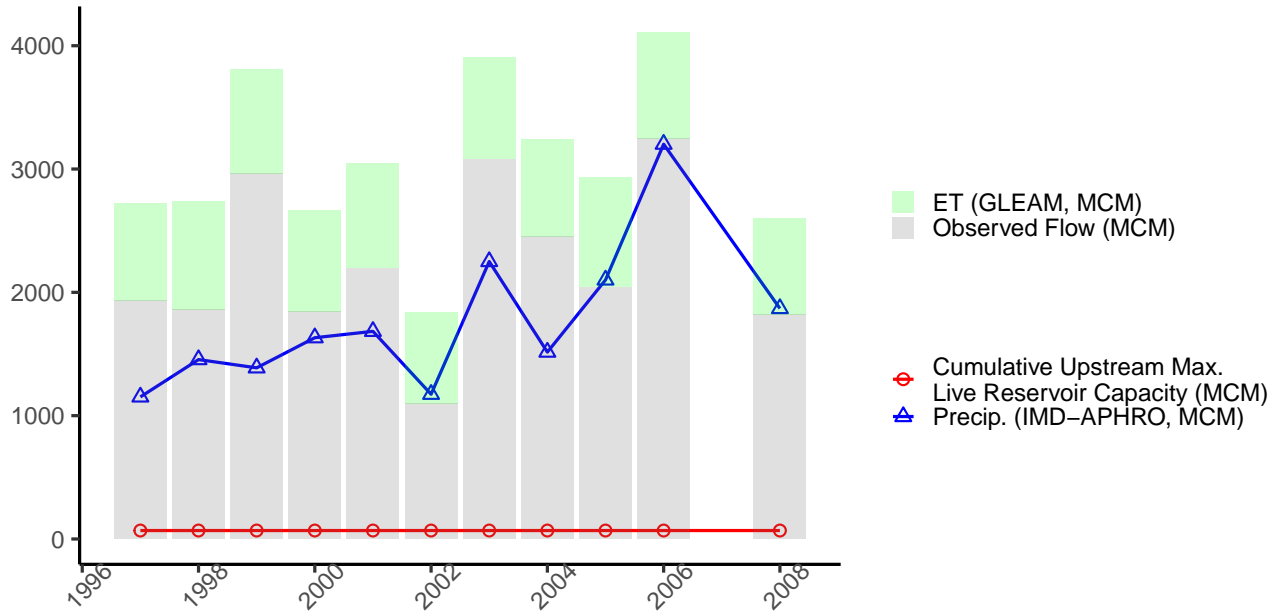

soon (Jun–Sep), Station: Potteru (Seasonal), River: Godavari/Sabari/Potteru Vagu  
 GHI ID: goda\_potte, Catch. Area: 1175 sq. km

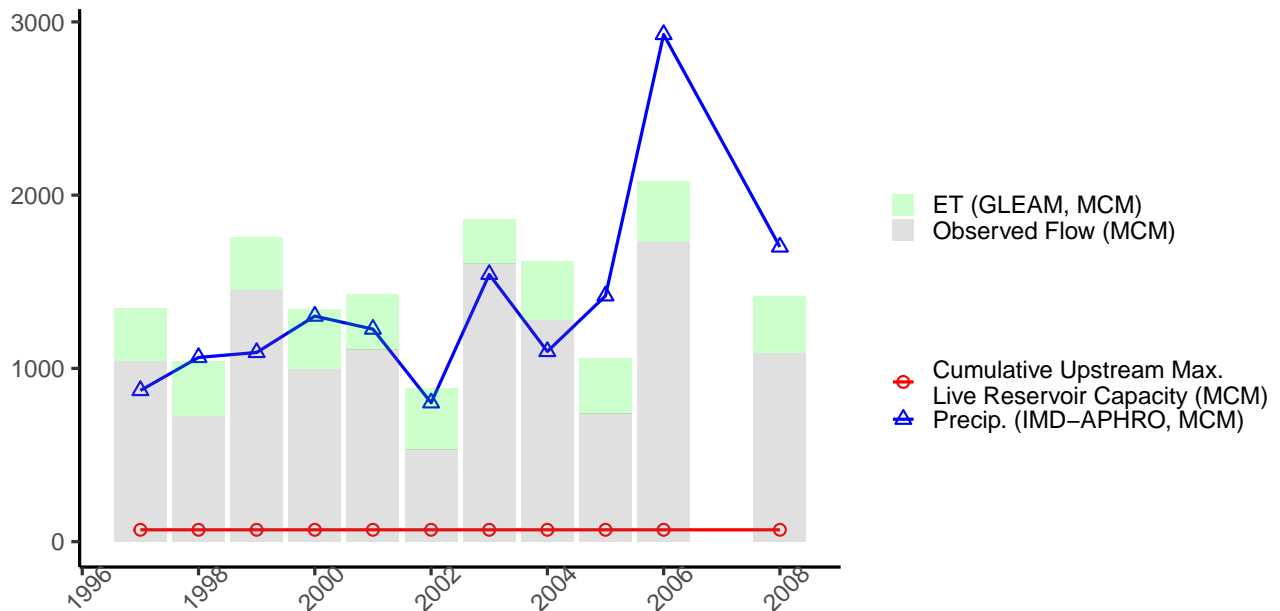

Annual (Jun–May), Station: Saradaput, River: Godavari/Sabari  
 GHI ID: goda\_sarad, Catch. Area: 5098 sq. km

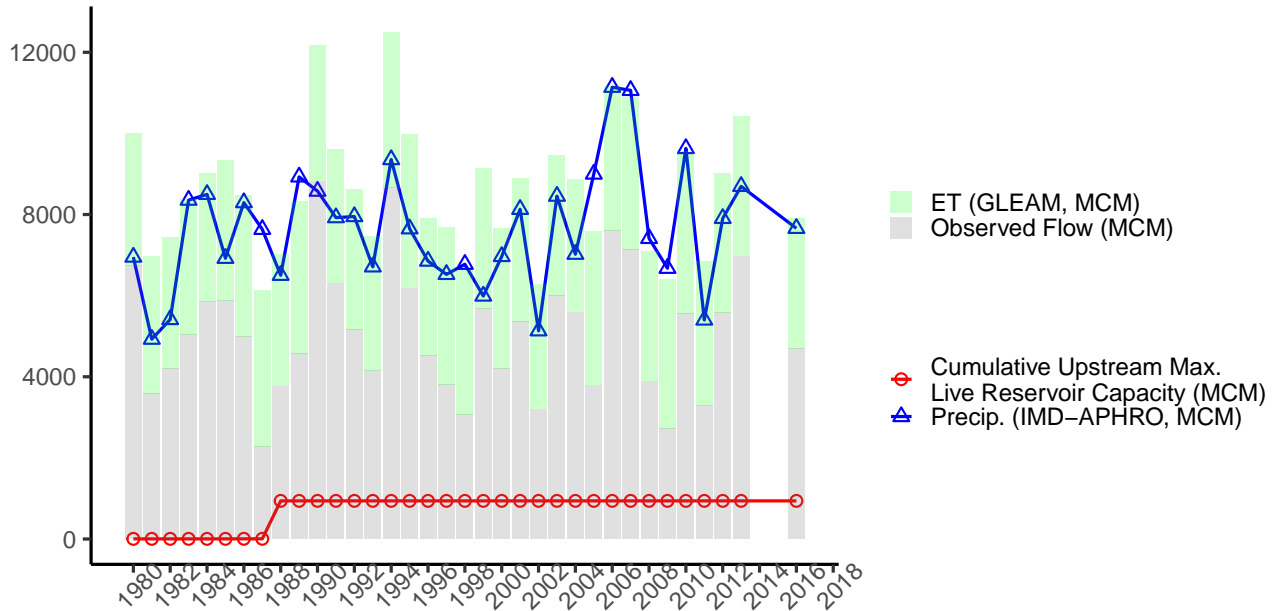

Monsoon (Jun–Sep), Station: Saradaput, River: Godavari/Sabari  
 GHI ID: goda\_sarad, Catch. Area: 5098 sq. km

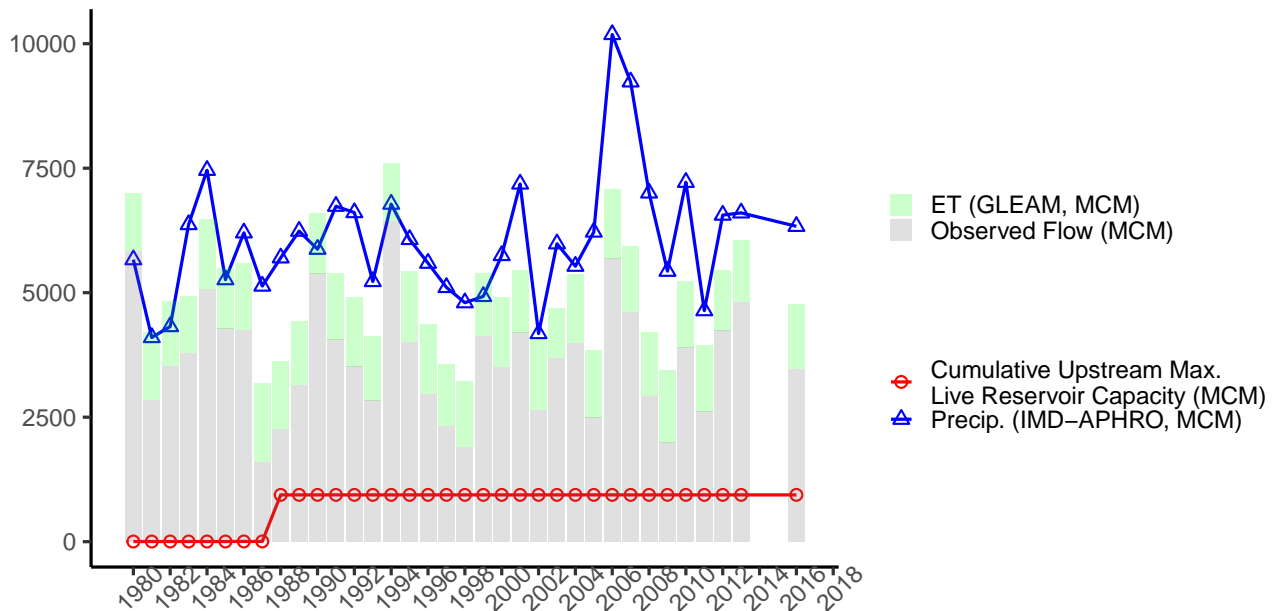

Annual (Jun–May), Station: Akhnoor, River: Chenab  
GHI ID: indu\_akhno, Catch. Area: 22691 sq. km

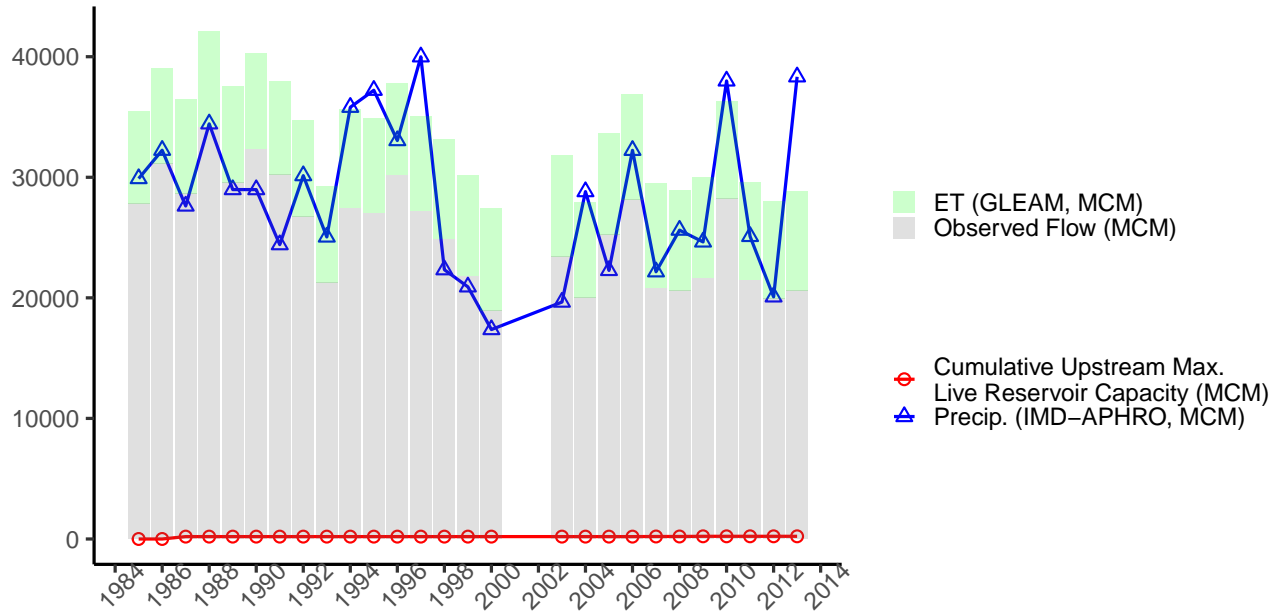

Annual (Jun–May), Station: Arjunwad (Seasonal), River: Krishna  
 GHI ID: kris\_arjun, Catch. Area: 12280 sq. km

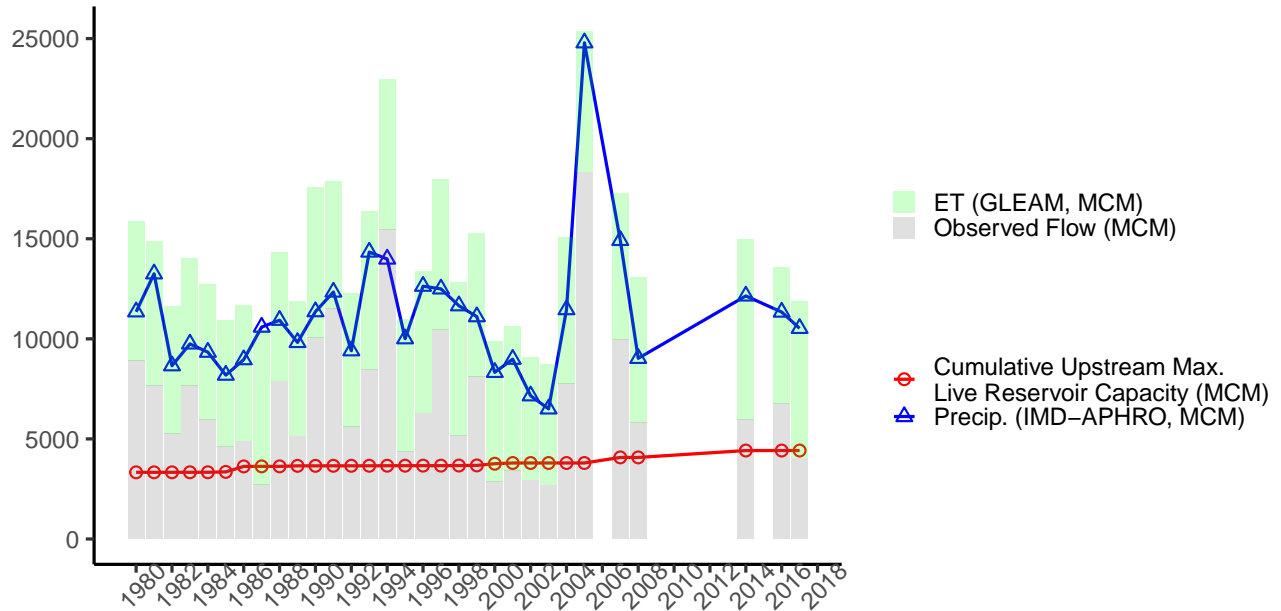

Monsoon (Jun–Sep), Station: Arjunwad (Seasonal), River: Krishna  
 GHI ID: kris\_arjun, Catch. Area: 12280 sq. km

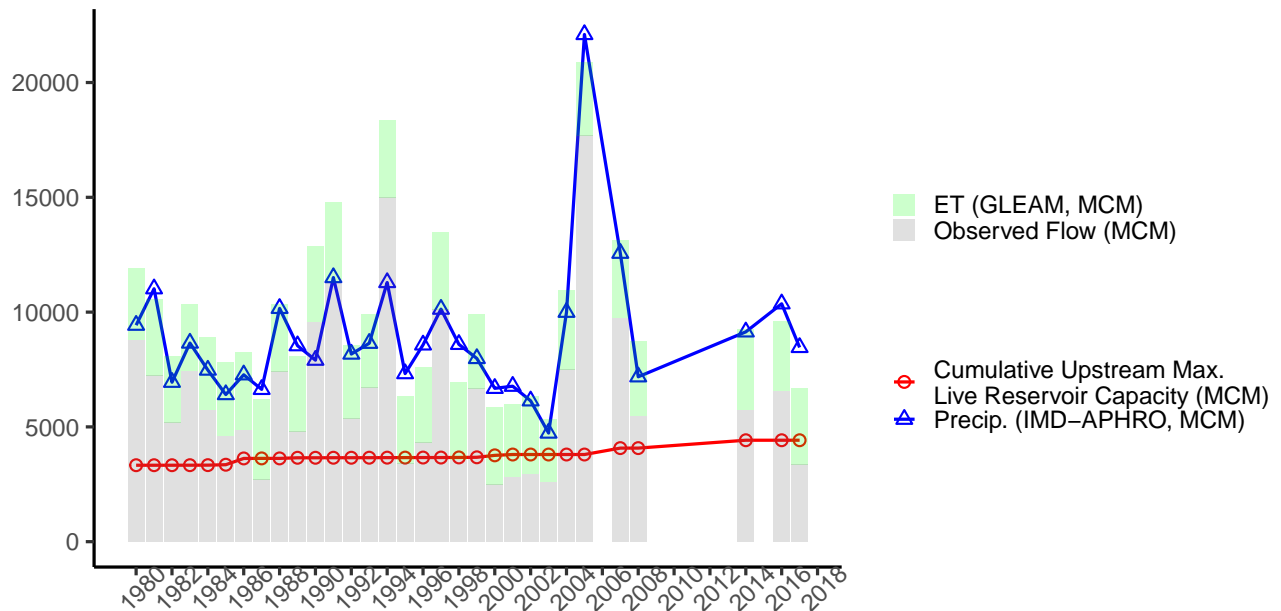

Annual (Jun–May), Station: Karad, River: Krishna  
GHI ID: kris\_karad, Catch. Area: 5432 sq. km

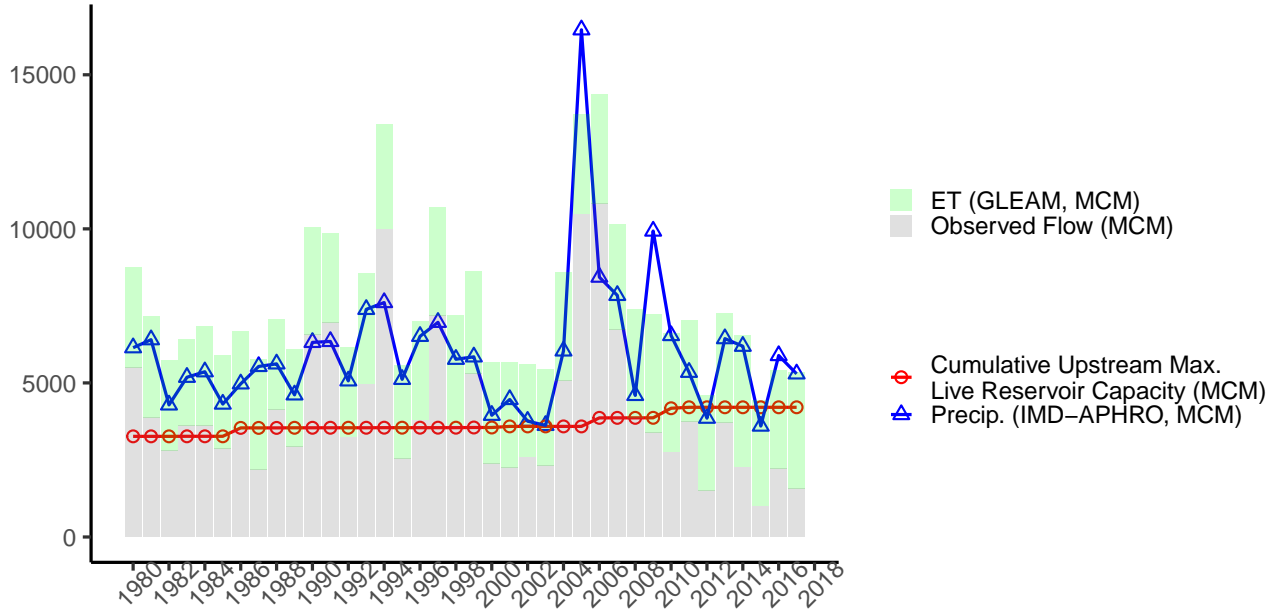

Monsoon (Jun–Sep), Station: Karad, River: Krishna  
GHI ID: kris\_karad, Catch. Area: 5432 sq. km

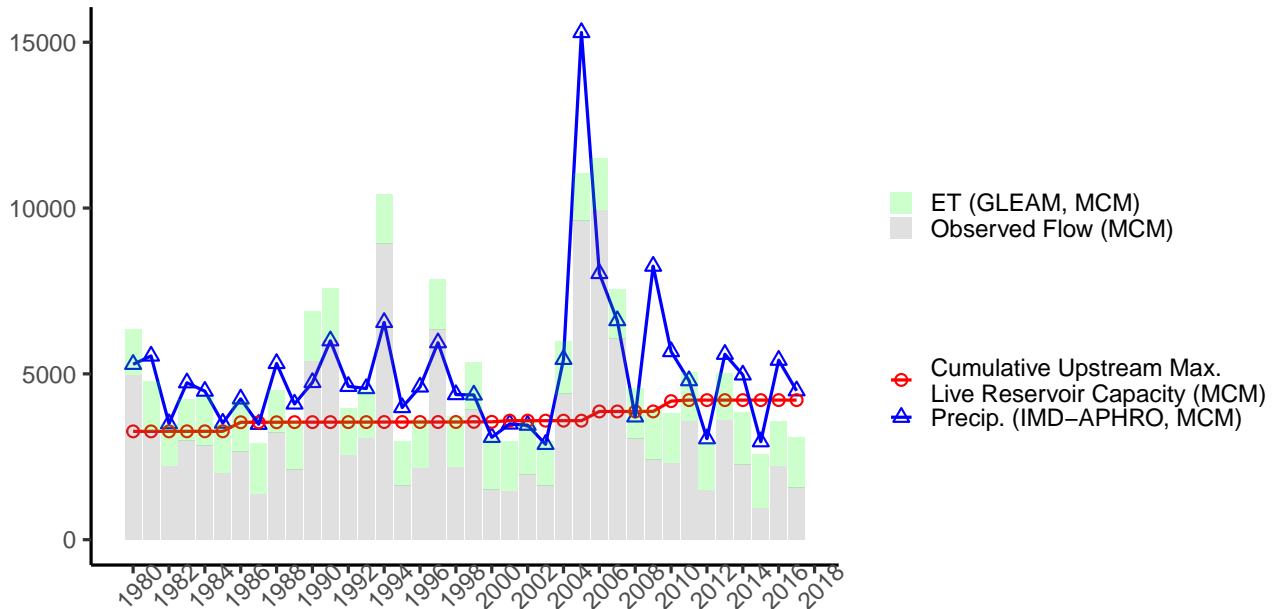

Annual (Jun–May), Station: Kurundwad, River: Krishna  
 GHI ID: kris\_kurun, Catch. Area: 15265 sq. km

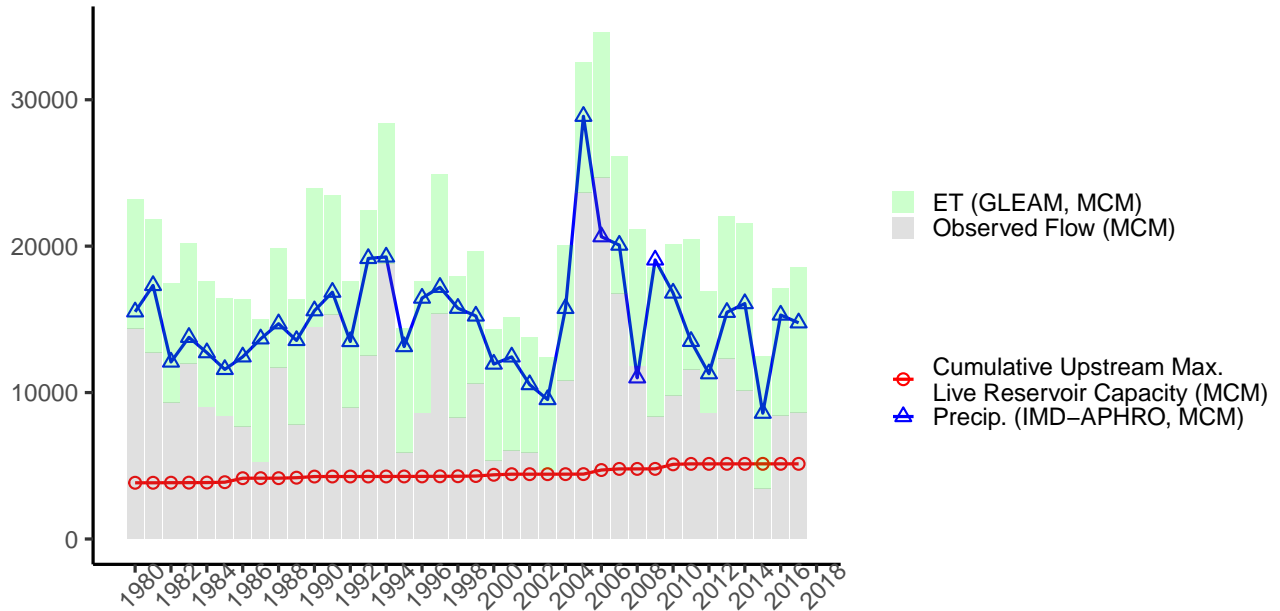

Monsoon (Jun–Sep), Station: Kurundwad, River: Krishna  
 GHI ID: kris\_kurun, Catch. Area: 15265 sq. km

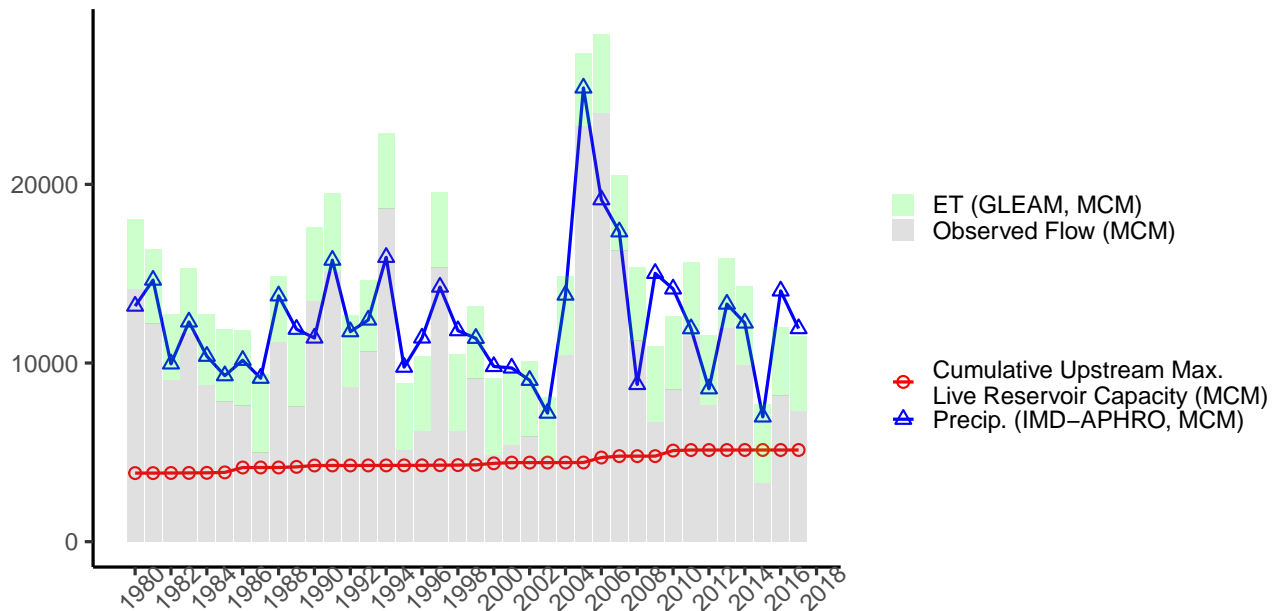

Annual (Jun–May), Station: Phulgaon (Seasonal), River: Krishna/Bhima  
 GHI ID: kris\_phulg, Catch. Area: 2142 sq. km

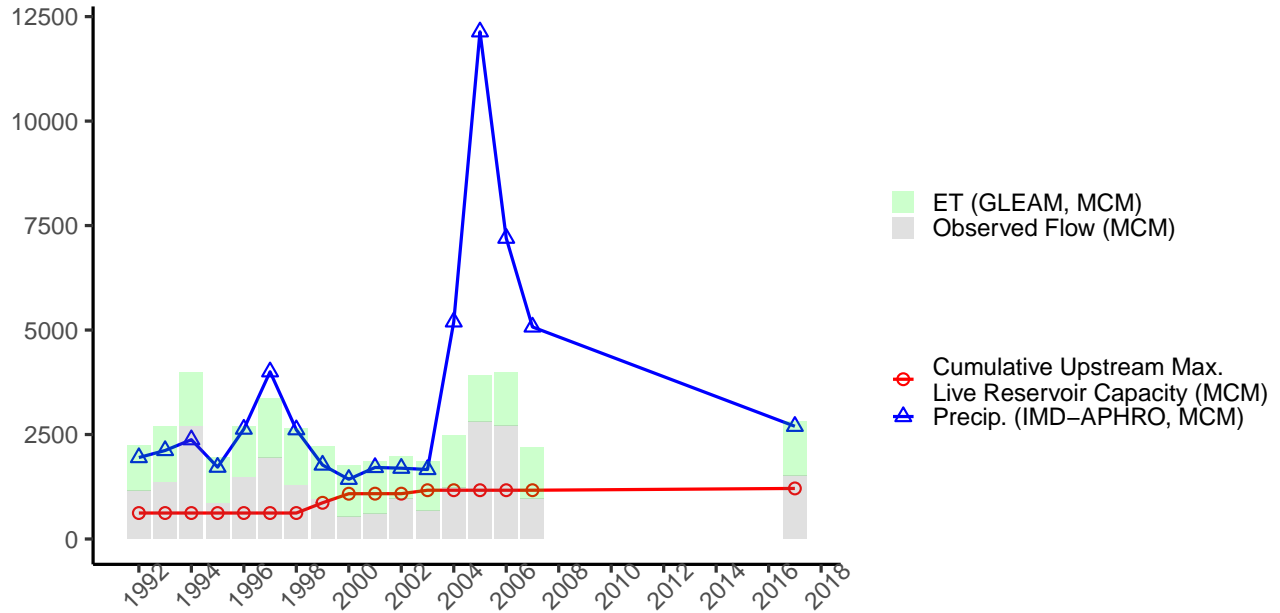

Monsoon (Jun–Sep), Station: Phulgaon (Seasonal), River: Krishna/Bhima  
 GHI ID: kris\_phulg, Catch. Area: 2142 sq. km

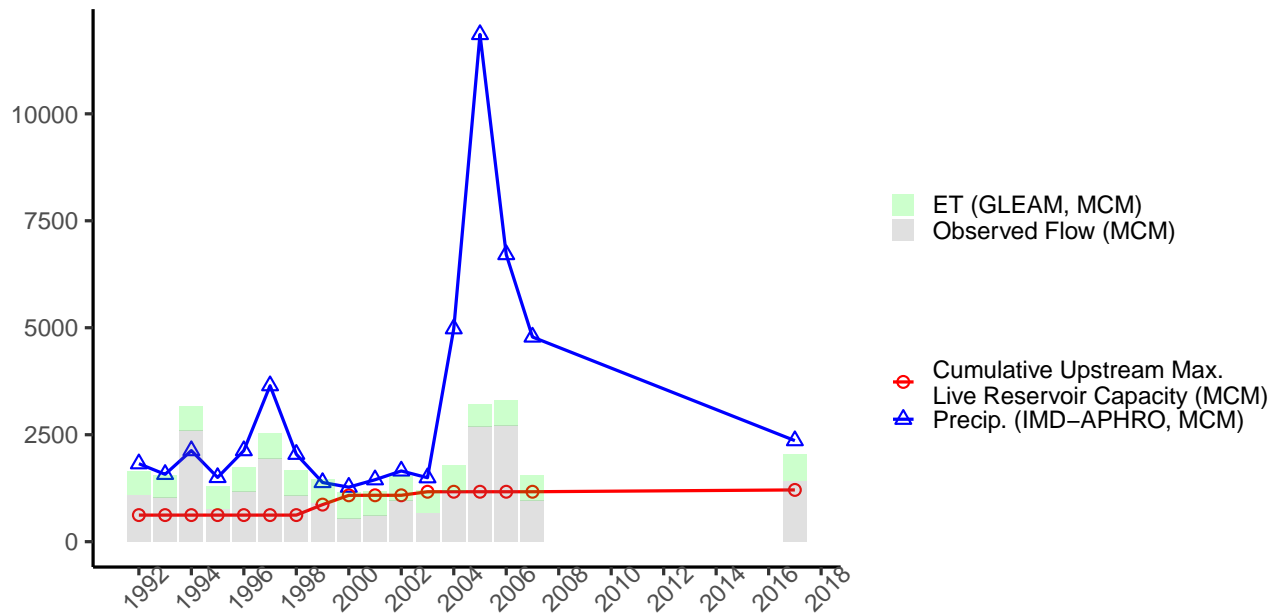

Annual (Jun–May), Station: Sadalga (Seasonal), River: Krishna/Dudhganga  
 GHI ID: kris\_sadal, Catch. Area: 2285 sq. km

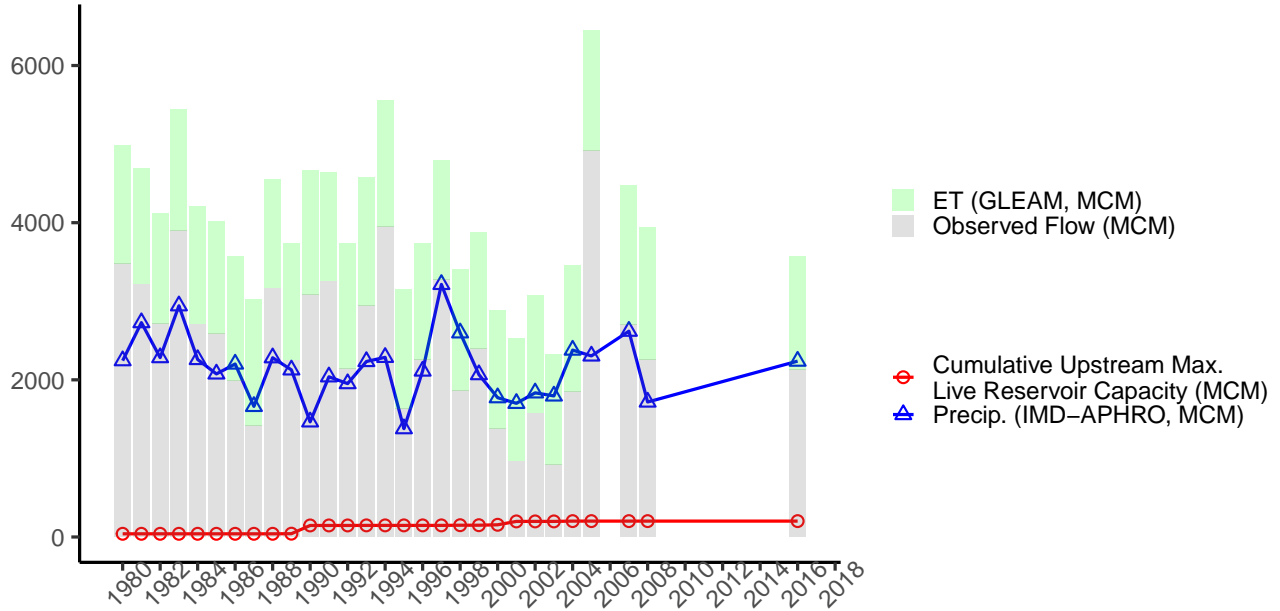

Monsoon (Jun–Sep), Station: Sadalga (Seasonal), River: Krishna/Dudhganga  
 GHI ID: kris\_sadal, Catch. Area: 2285 sq. km

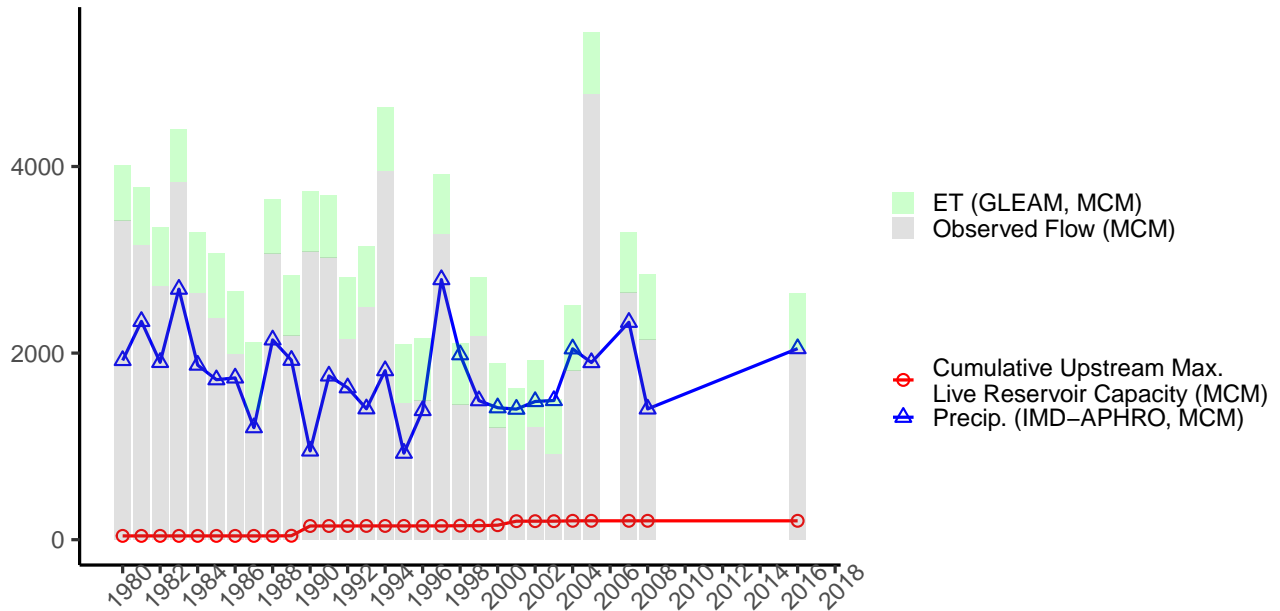



Annual (Jun–May), Station: Samdoli (Seasonal), River: Krishna/Varna  
GHI ID: kris\_samdo, Catch. Area: 2010 sq. km

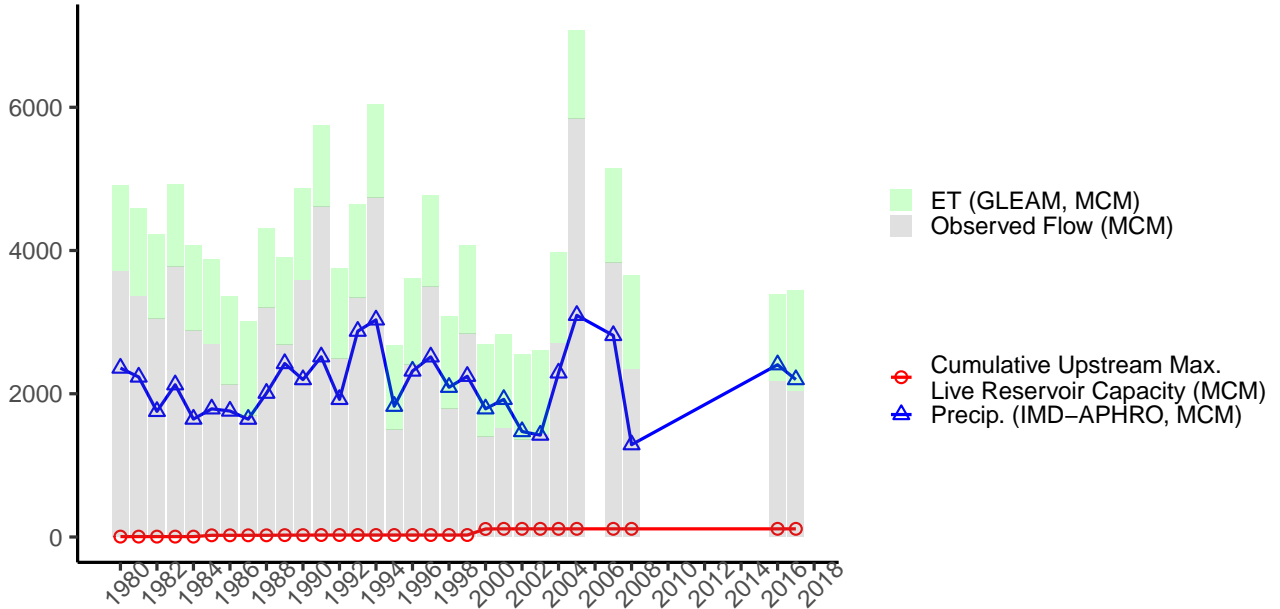

Monsoon (Jun–Sep), Station: Samdoli (Seasonal), River: Krishna/Varna  
GHI ID: kris\_samdo, Catch. Area: 2010 sq. km

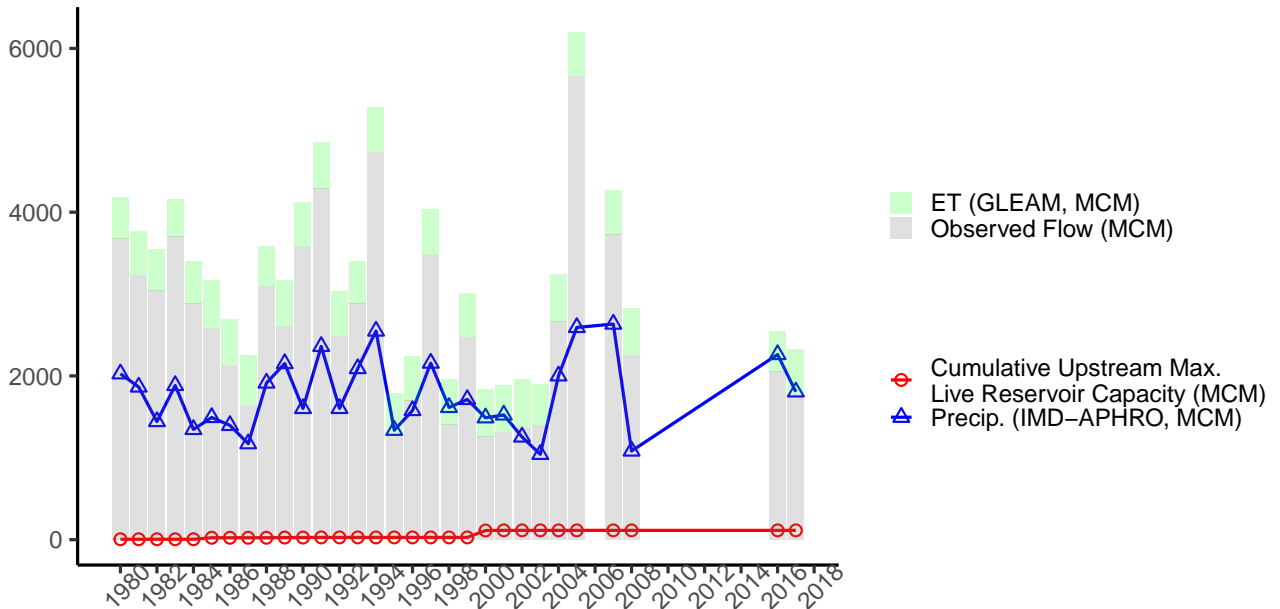

Annual (Jun–May), Station: Shimoga, River: Tungabhadra/Tunga  
 GHI ID: kris\_shimo, Catch. Area: 2761 sq. km

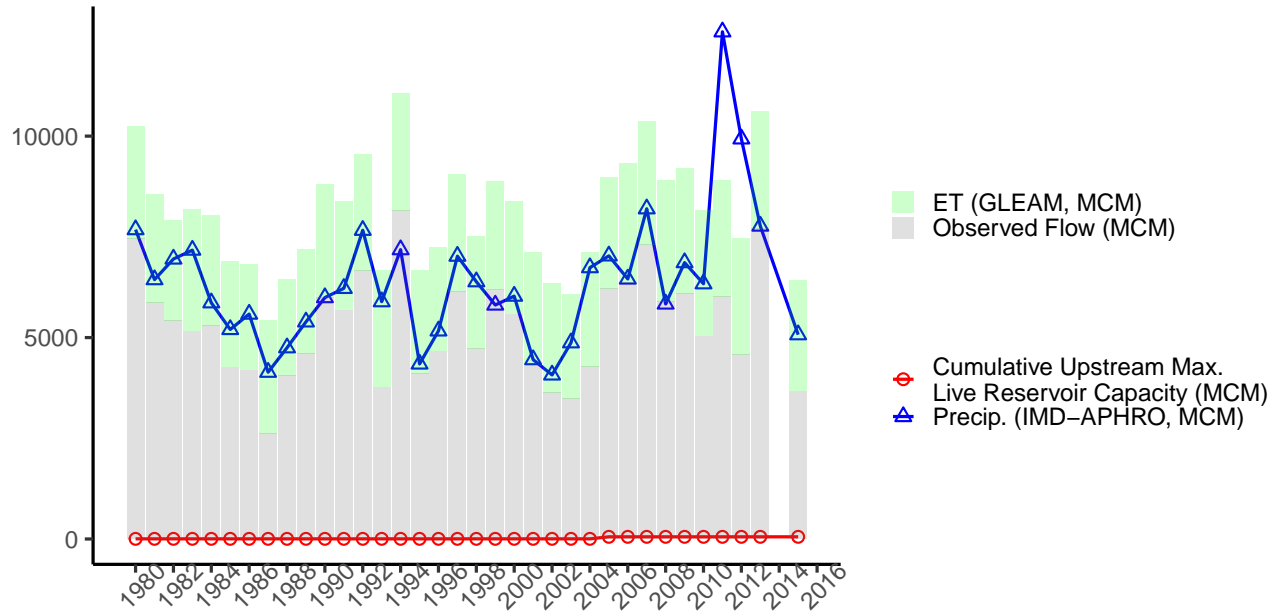

Monsoon (Jun–Sep), Station: Shimoga, River: Tungabhadra/Tunga  
 GHI ID: kris\_shimo, Catch. Area: 2761 sq. km

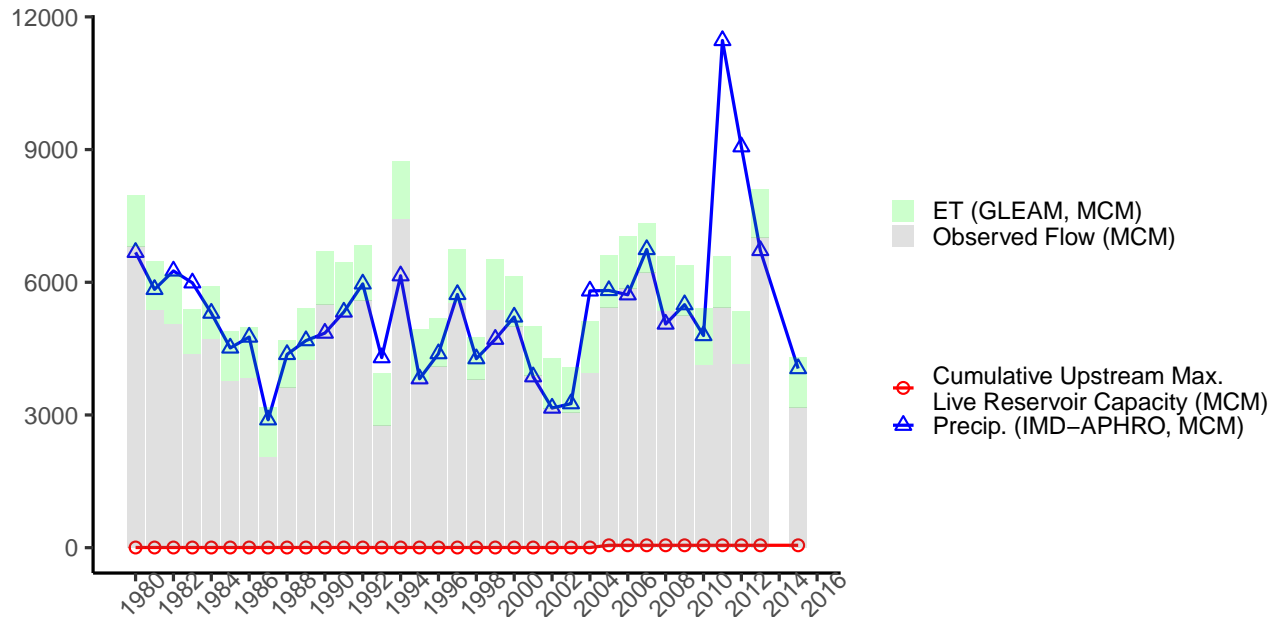

Annual (Jun–May), Station: Terwad (Seasonal), River: Krishna/Panchganga  
 GHI ID: kris\_terwa, Catch. Area: 2444 sq. km

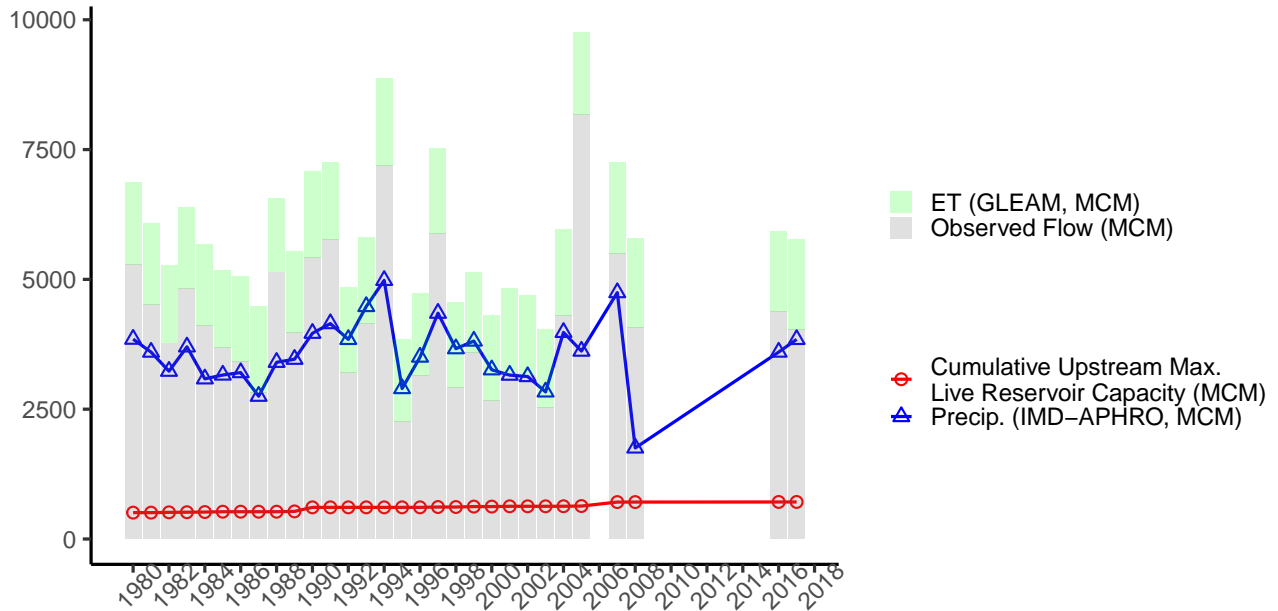

Monsoon (Jun–Sep), Station: Terwad (Seasonal), River: Krishna/Panchganga  
 GHI ID: kris\_terwa, Catch. Area: 2444 sq. km

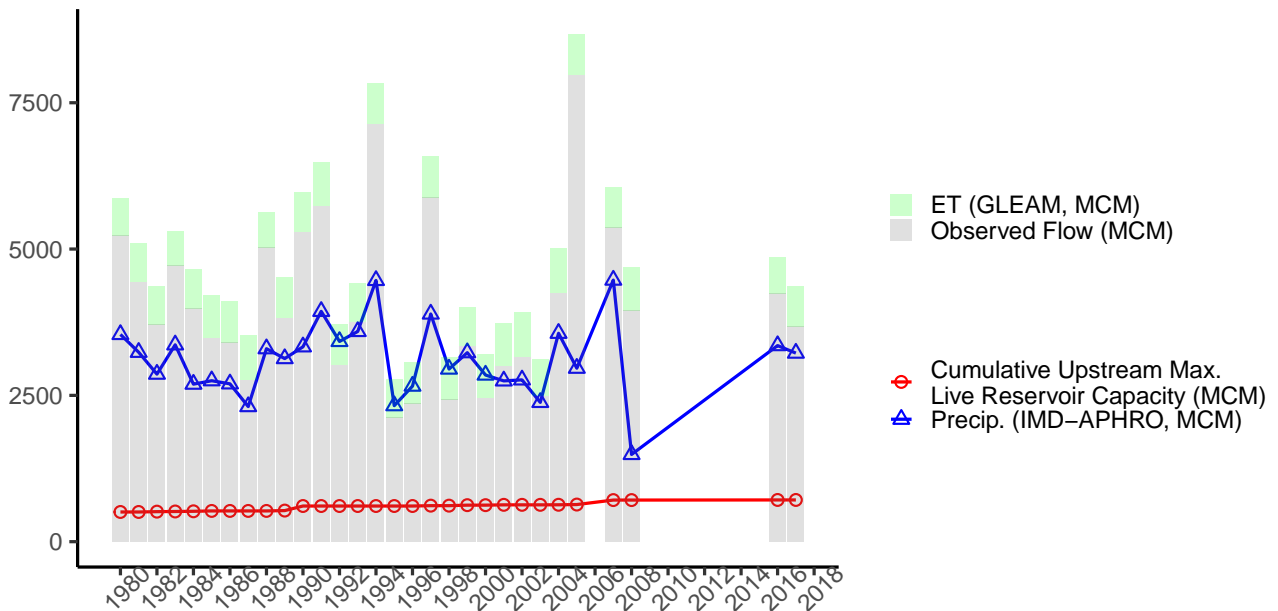

Annual (Jun–May), Station: Warunjli, River: Krishna/Koyna  
 GHI ID: kris\_warun, Catch. Area: 1909 sq. km

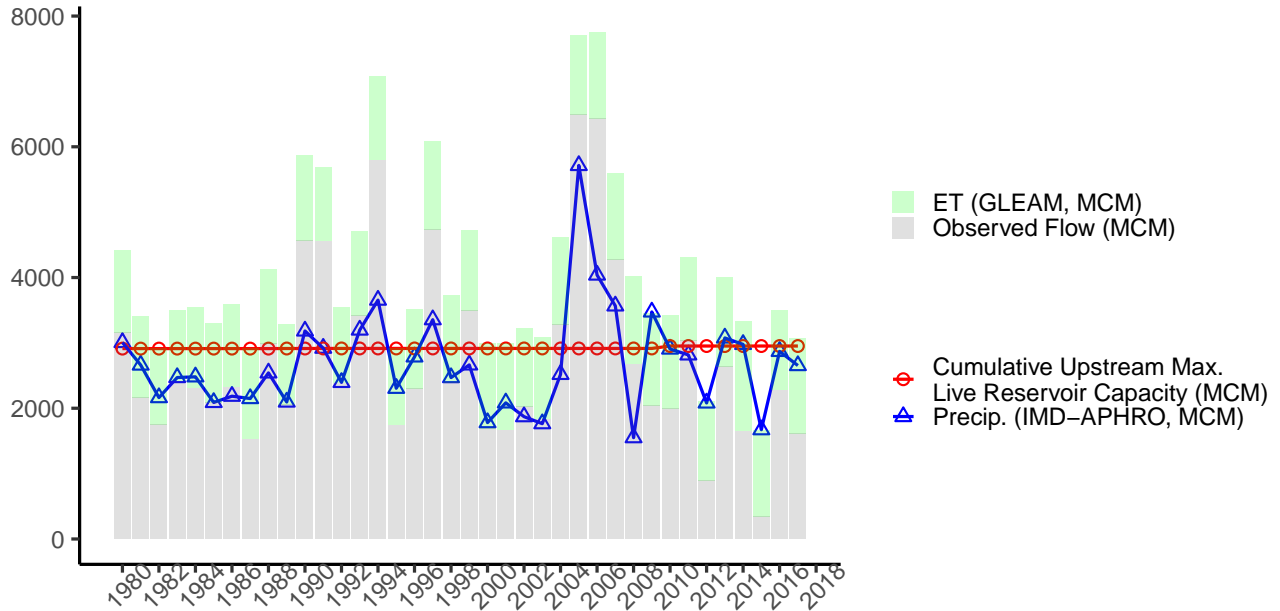

Monsoon (Jun–Sep), Station: Warunjli, River: Krishna/Koyna  
 GHI ID: kris\_warun, Catch. Area: 1909 sq. km

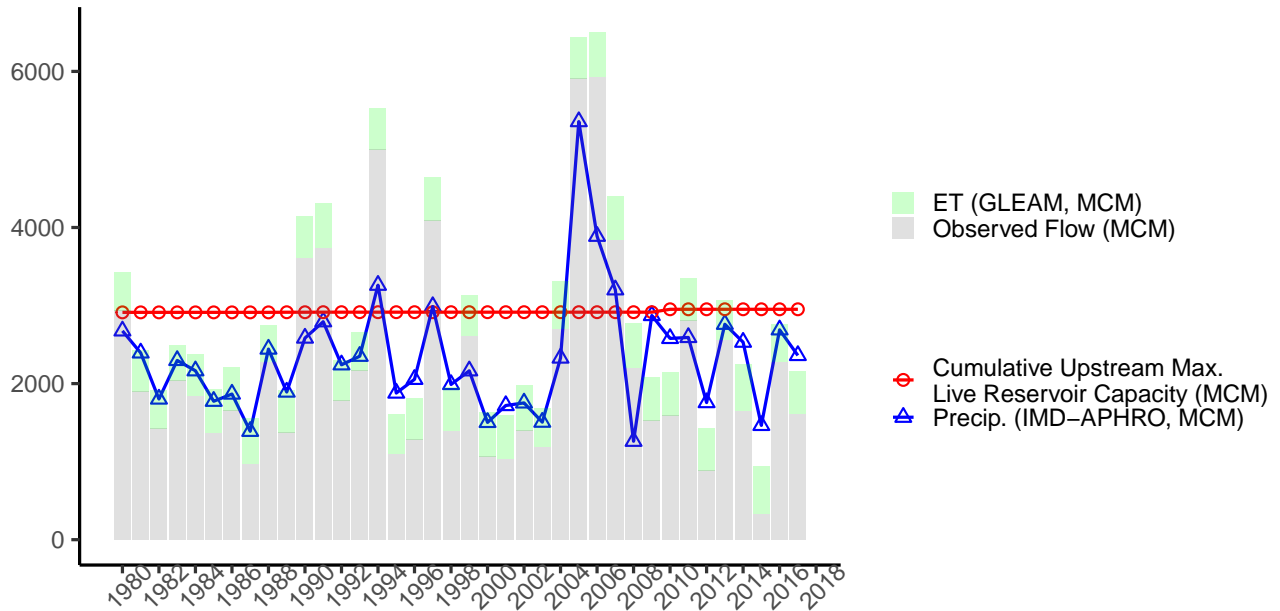

Annual (Jun–May), Station: Chakaliya, River: Mahi/Anas  
 GHI ID: mahi\_chaka, Catch. Area: 3608 sq. km

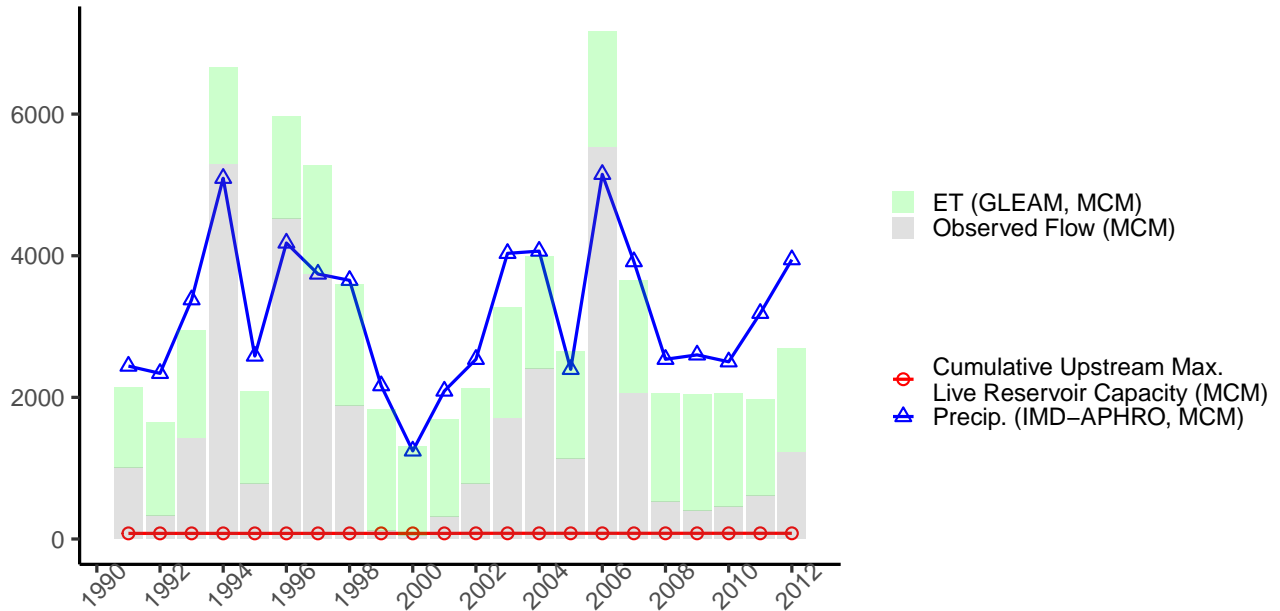

Monsoon (Jun–Sep), Station: Chakaliya, River: Mahi/Anas  
 GHI ID: mahi\_chaka, Catch. Area: 3608 sq. km

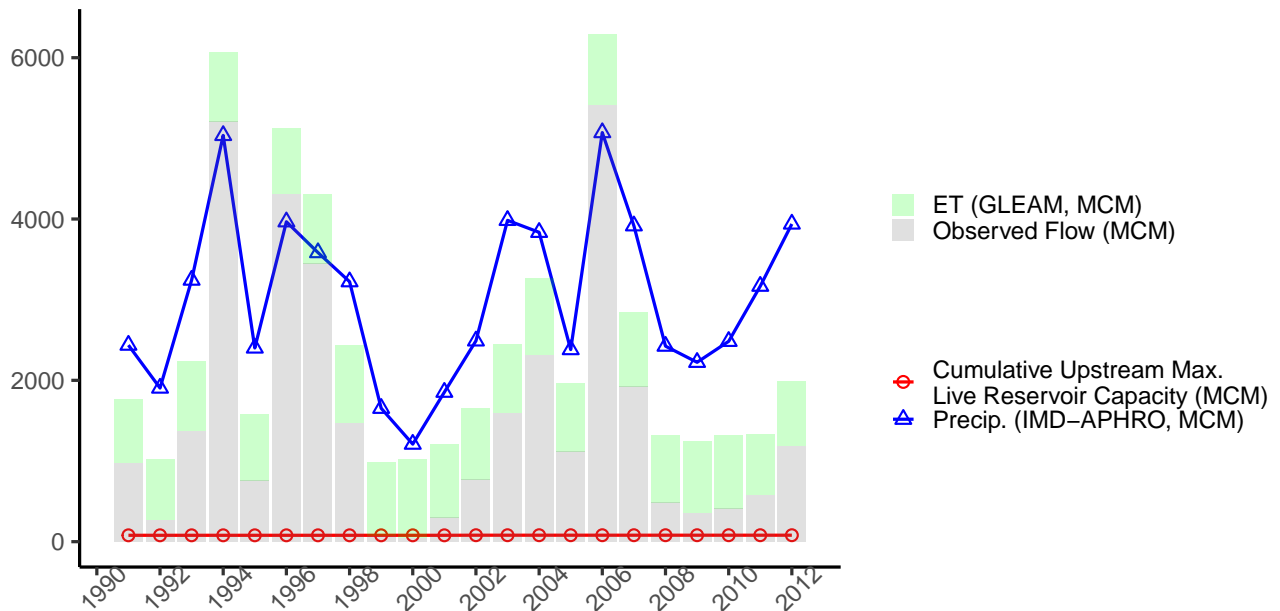

Annual (Jun–May), Station: Gadarwara, River: Narmada/Sakkar  
GHI ID: narm\_gadar, Catch. Area: 2232 sq. km

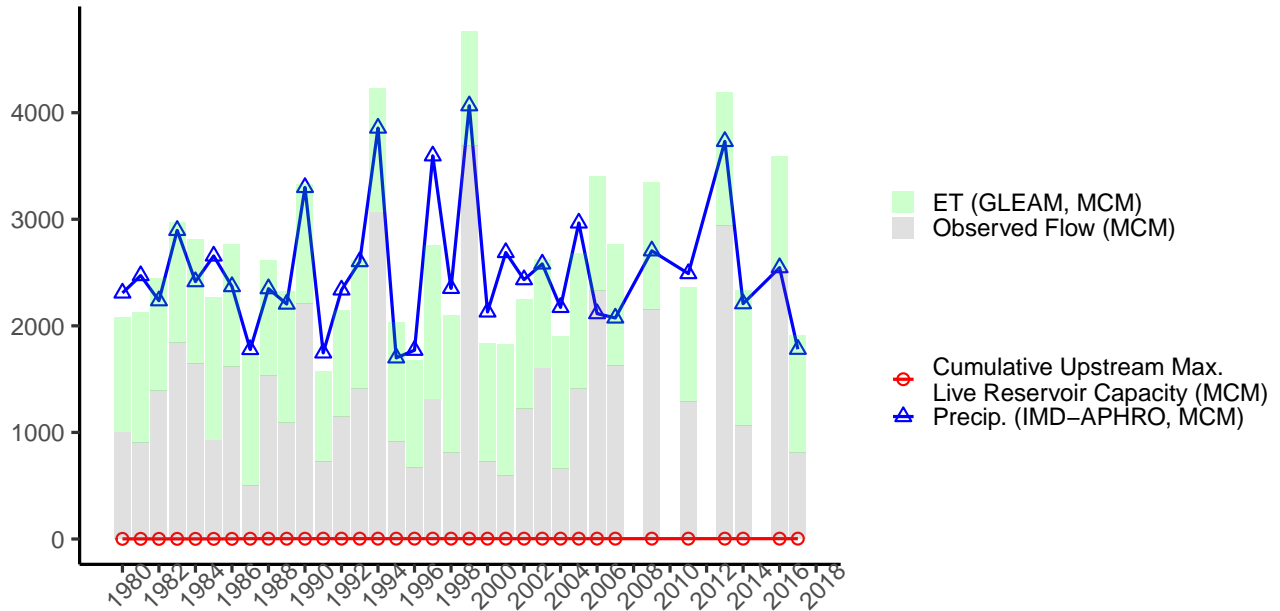

Monsoon (Jun–Sep), Station: Gadarwara, River: Narmada/Sakkar  
GHI ID: narm\_gadar, Catch. Area: 2232 sq. km

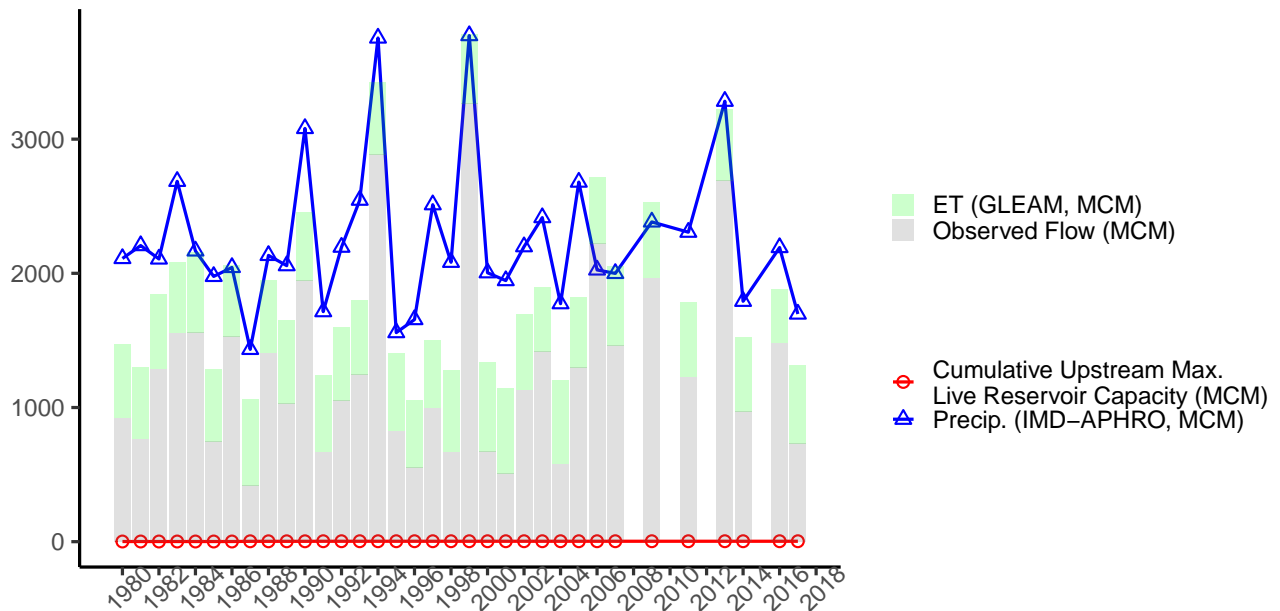

Annual (Jun–May), Station: Govindapur, River: Burhabalang  
 GHI ID: sube\_govin, Catch. Area: 4450 sq. km

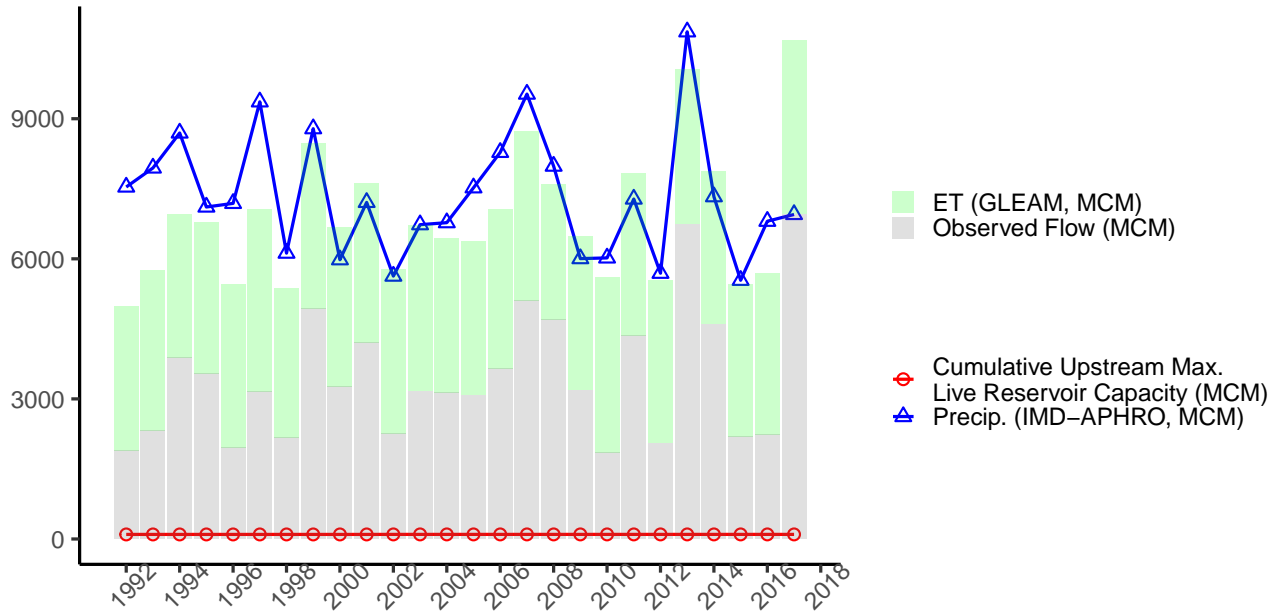

Monsoon (Jun–Sep), Station: Govindapur, River: Burhabalang  
 GHI ID: sube\_govin, Catch. Area: 4450 sq. km

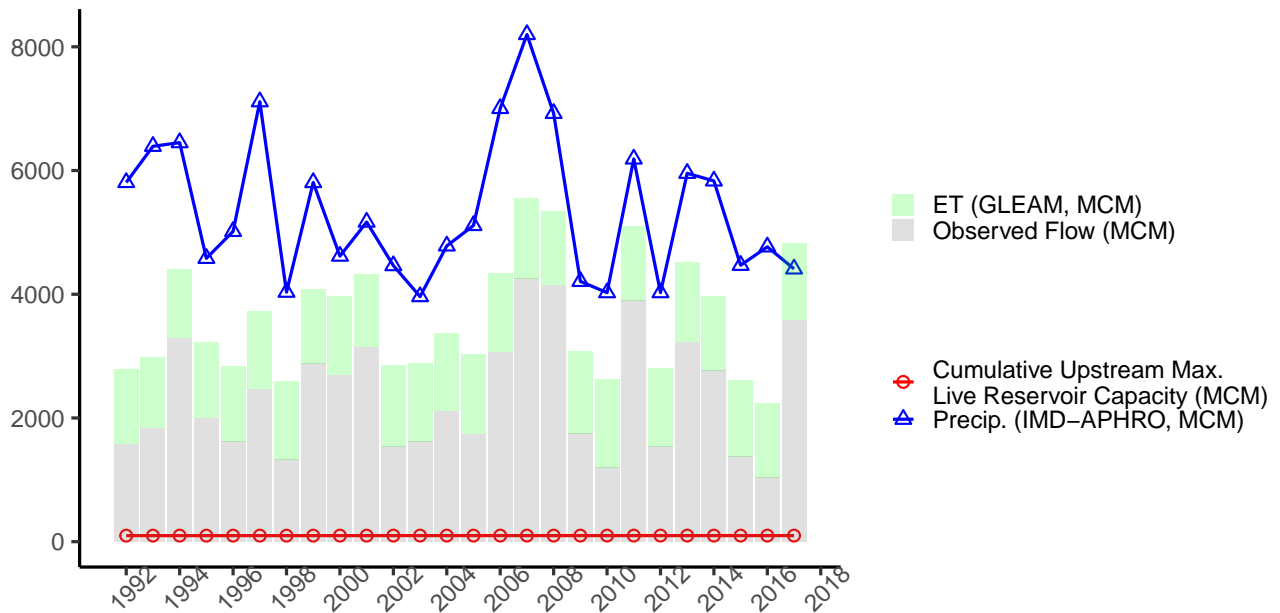

Annual (Jun–May), Station: Mahuwa, River: Purna  
 GHI ID: wfrn\_mahuw, Catch. Area: 1750 sq. km

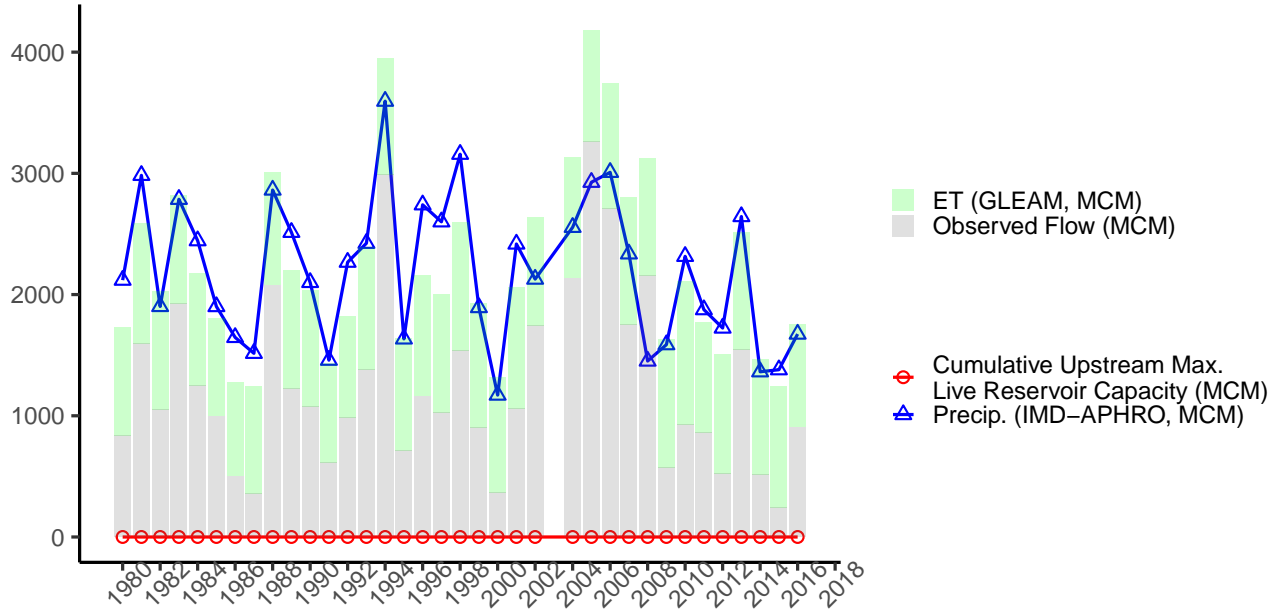

Monsoon (Jun–Sep), Station: Mahuwa, River: Purna  
 GHI ID: wfrn\_mahuw, Catch. Area: 1750 sq. km

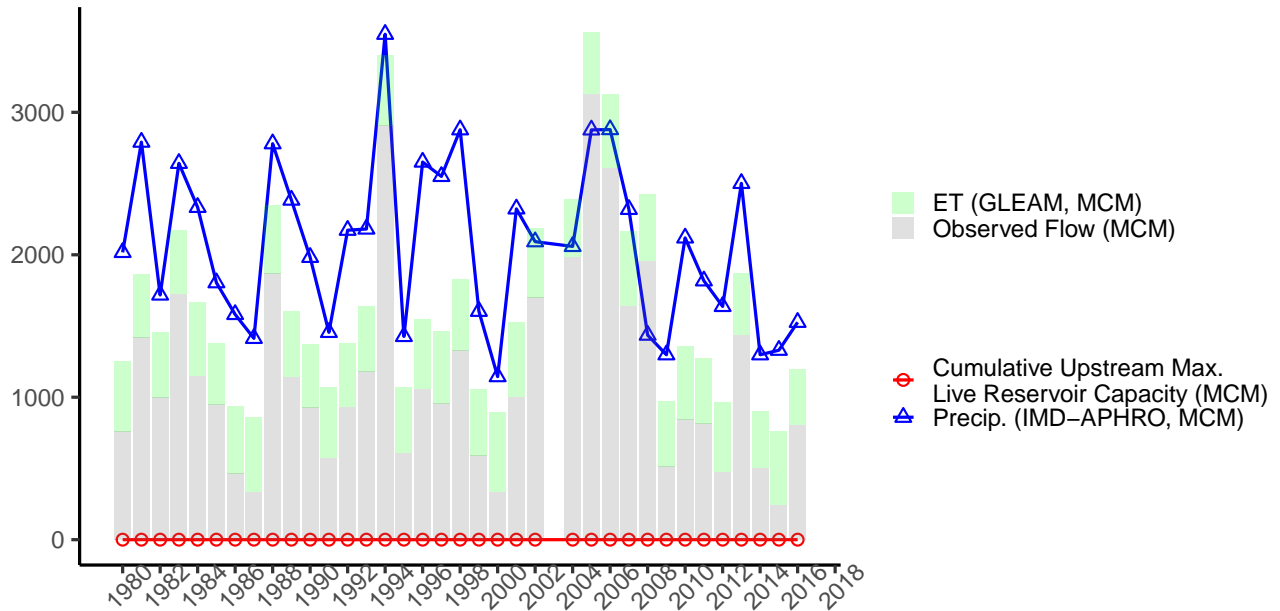



Annual (Jun–May), Station: Ozerkheda, River: Wagh/Damanganga  
 GHI ID: wfrn\_ozerk, Catch. Area: 678 sq. km

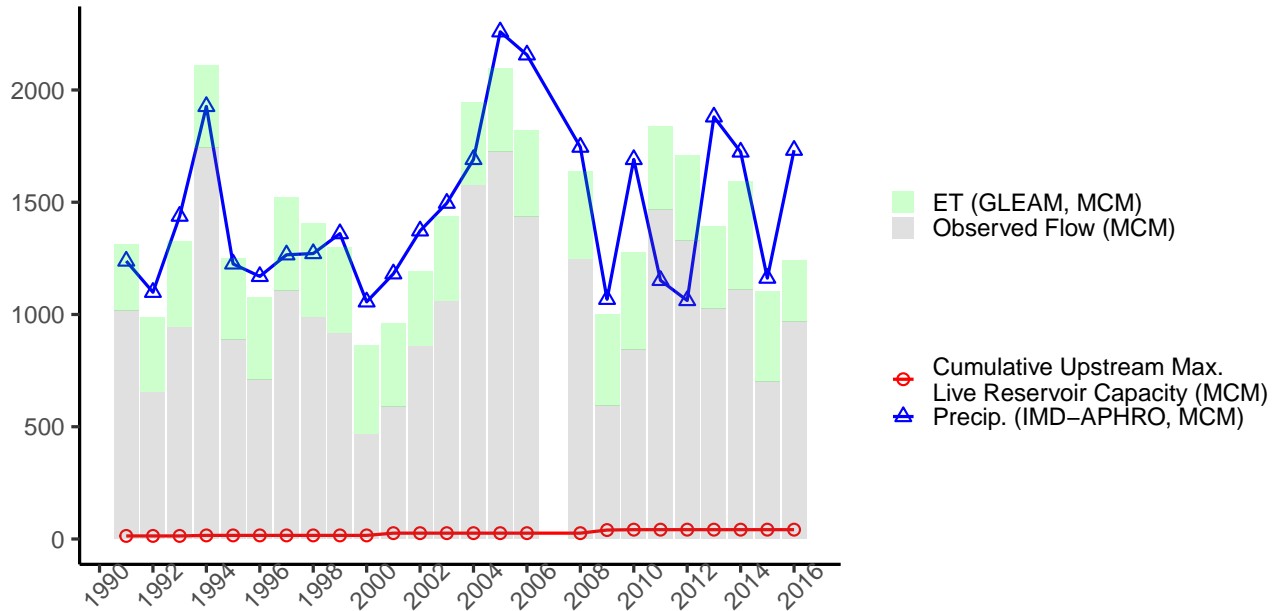

Monsoon (Jun–Sep), Station: Ozerkheda, River: Wagh/Damanganga  
 GHI ID: wfrn\_ozerk, Catch. Area: 678 sq. km

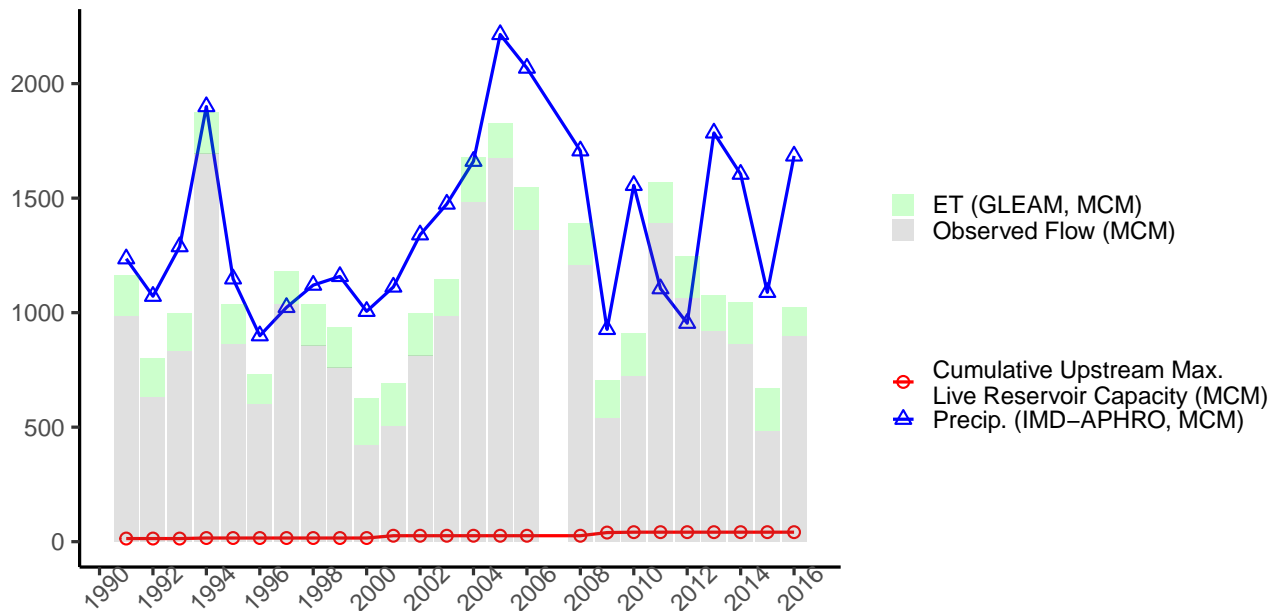

I (Jun–May), Station: Ambarampalayam, River: Bharathapuzha/Kannadipuzha/Aliyar  
 GHI ID: wfrs\_ambar, Catch. Area: 950 sq. km

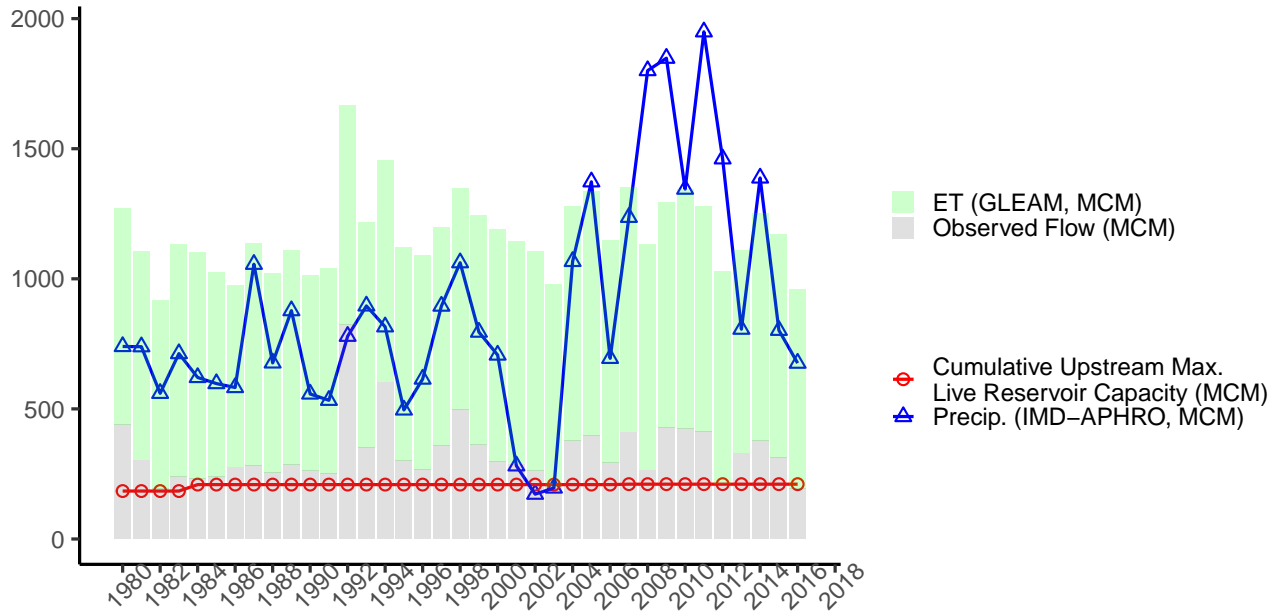

II (Jun–Sep), Station: Ambarampalayam, River: Bharathapuzha/Kannadipuzha/Aliyar  
 GHI ID: wfrs\_ambar, Catch. Area: 950 sq. km

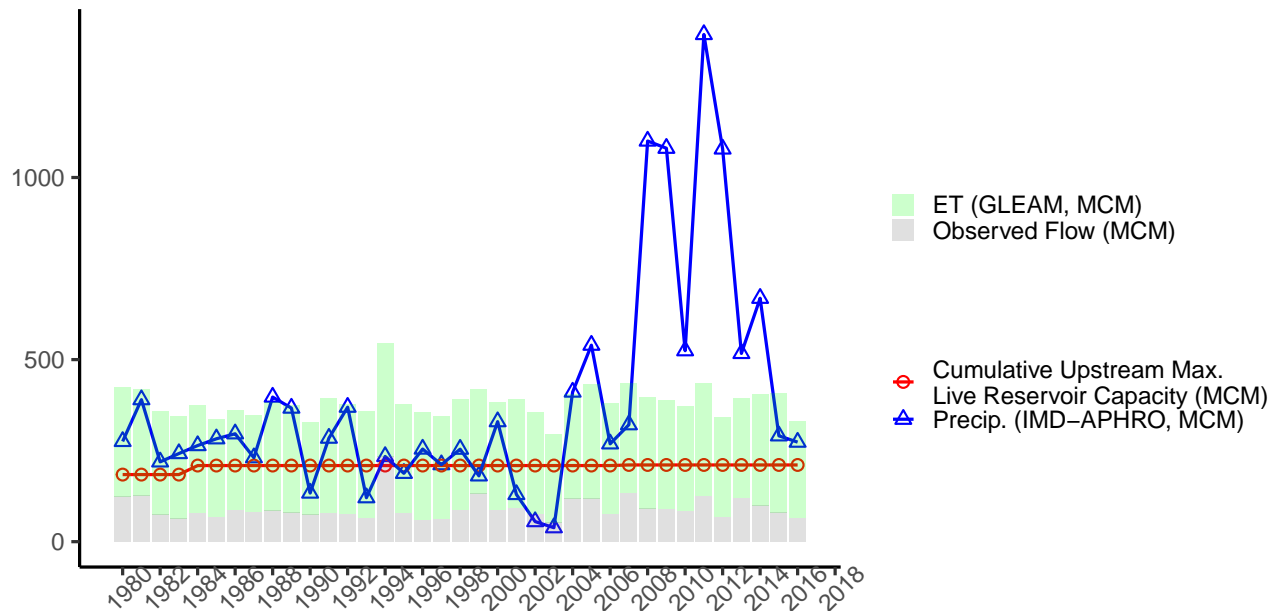

Annual (Jun–May), Station: Arangaly, River: Periyar/Chalakydy  
 GHI ID: wfrs\_arang, Catch. Area: 1342 sq. km

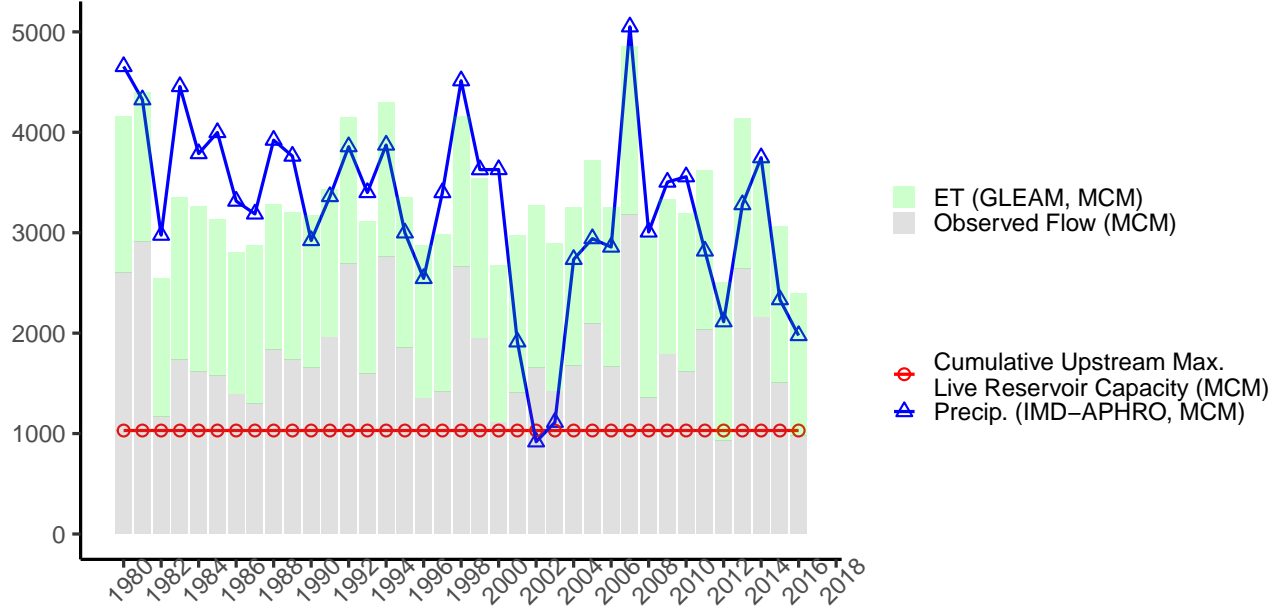

Monsoon (Jun–Sep), Station: Arangaly, River: Periyar/Chalakydy  
 GHI ID: wfrs\_arang, Catch. Area: 1342 sq. km

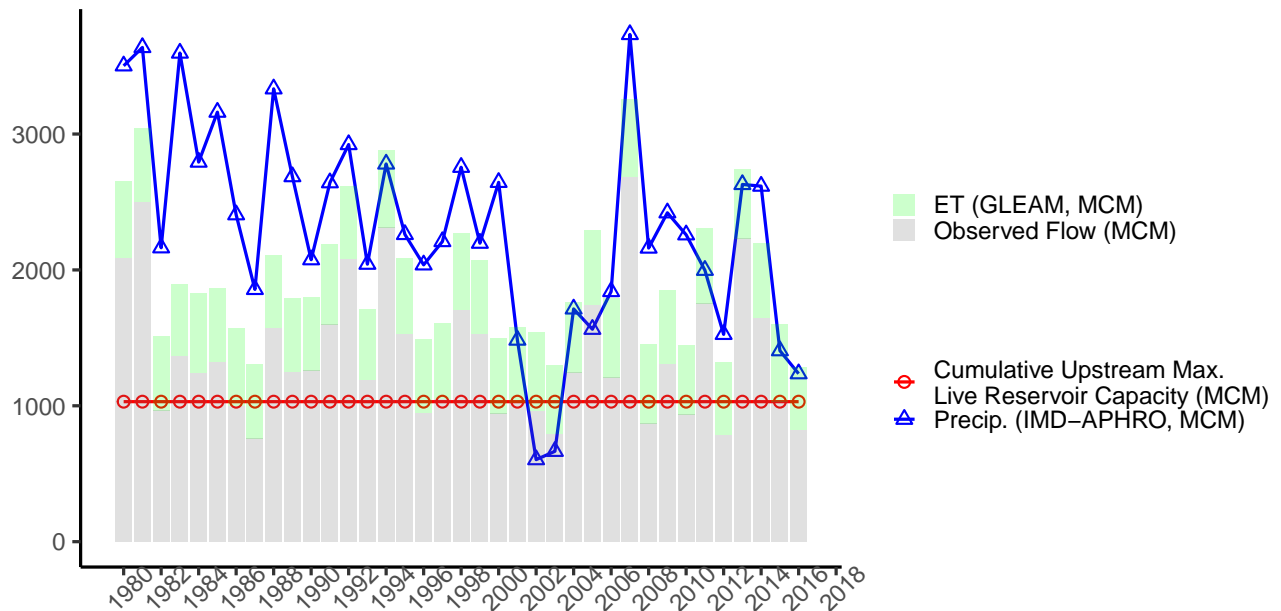

Annual (Jun–May), Station: Avershe, River: Seetha  
 GHI ID: wfrs\_avers, Catch. Area: 300 sq. km

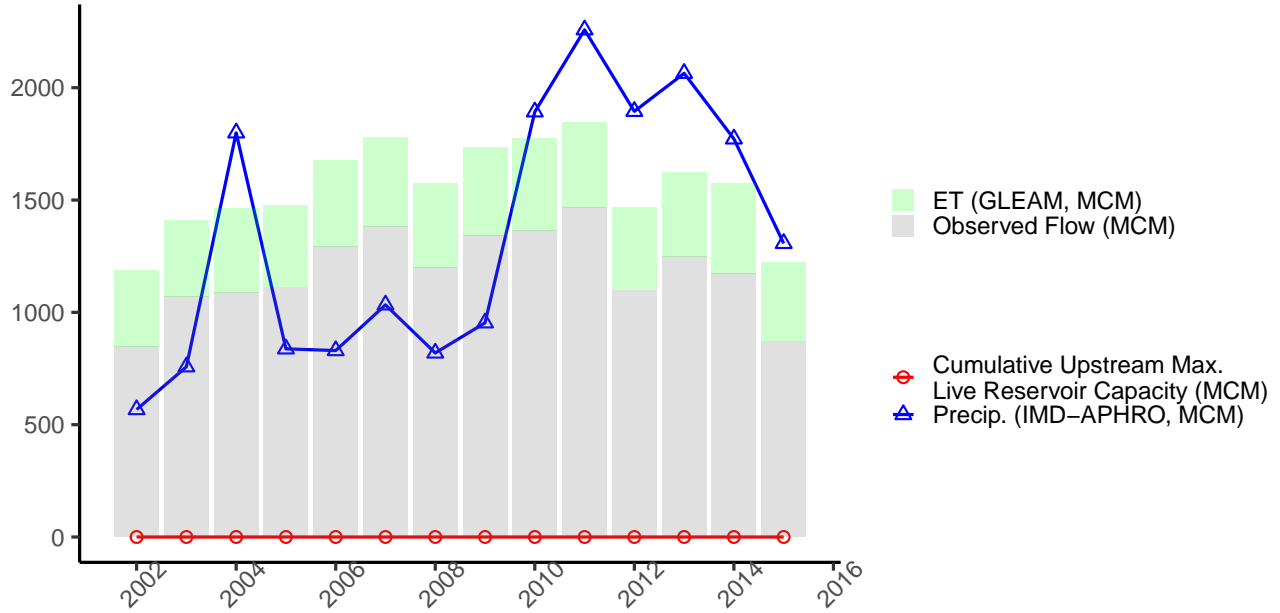

Monsoon (Jun–Sep), Station: Avershe, River: Seetha  
 GHI ID: wfrs\_avers, Catch. Area: 300 sq. km

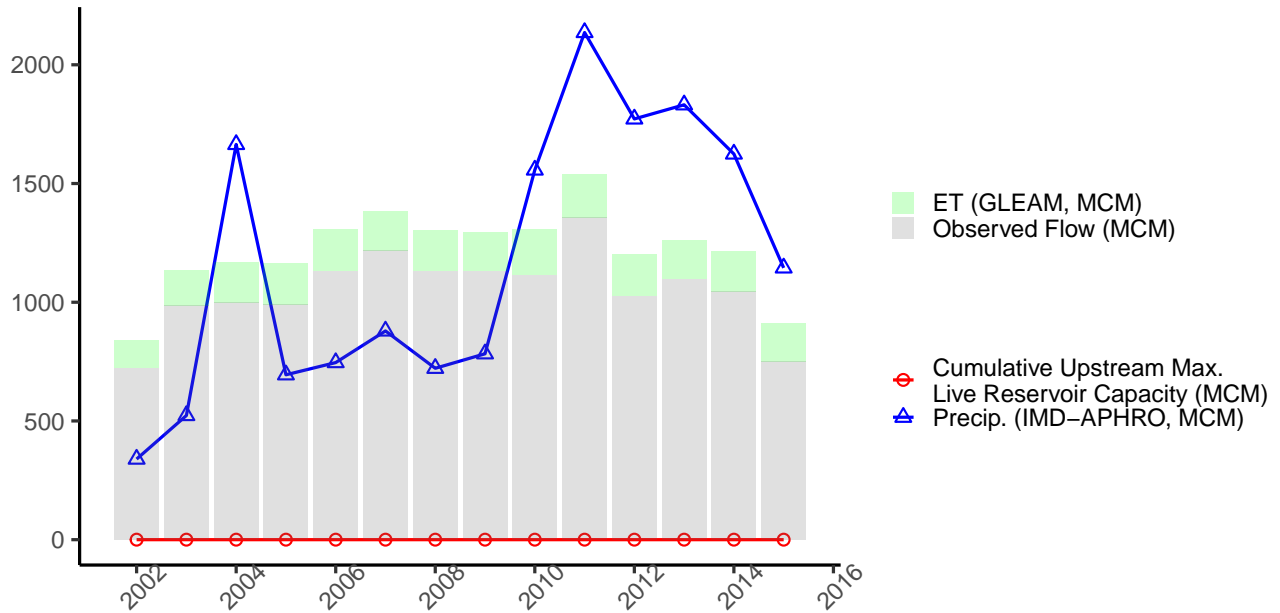

Annual (Jun–May), Station: Ayilam, River: Vamanapuram  
GHI ID: wfrs\_ayila, Catch. Area: 556 sq. km

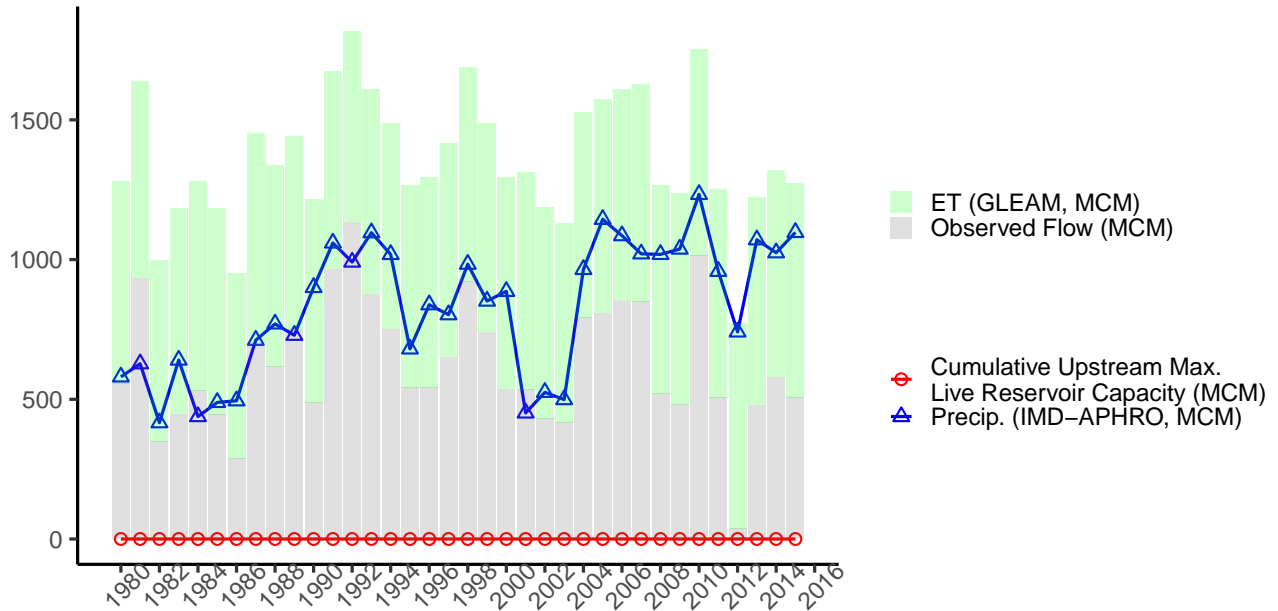

Monsoon (Jun–Sep), Station: Ayilam, River: Vamanapuram  
GHI ID: wfrs\_ayila, Catch. Area: 556 sq. km

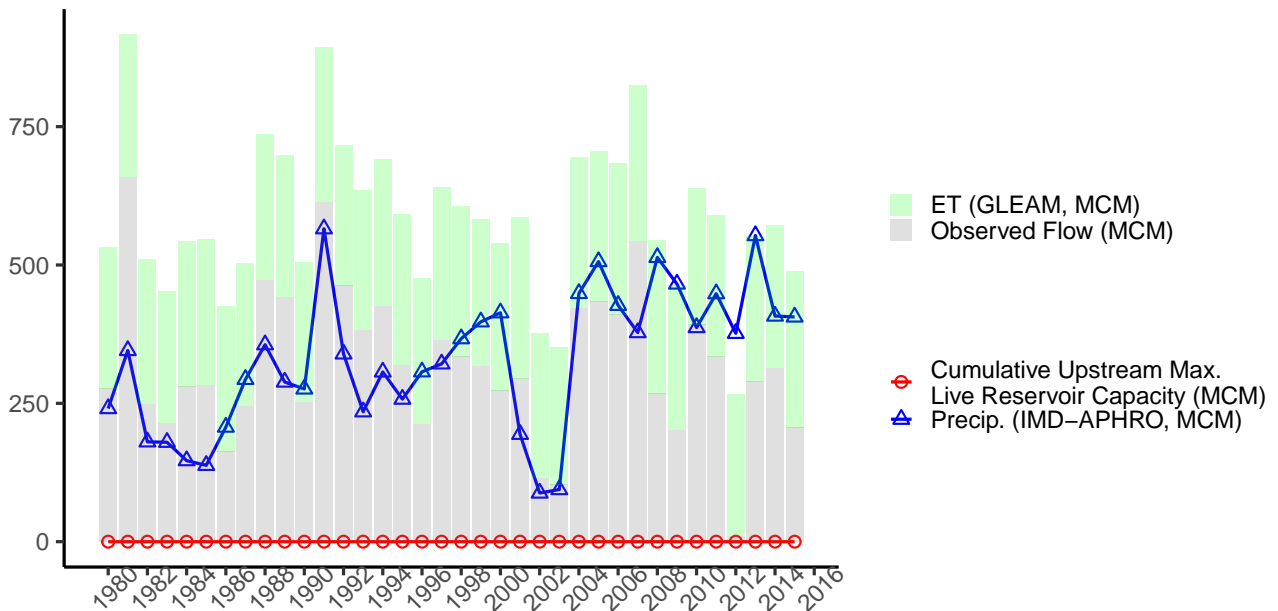

Annual (Jun–May), Station: Bantwal, River: Nethravathi  
 GHI ID: wfrs\_bantw, Catch. Area: 3295 sq. km

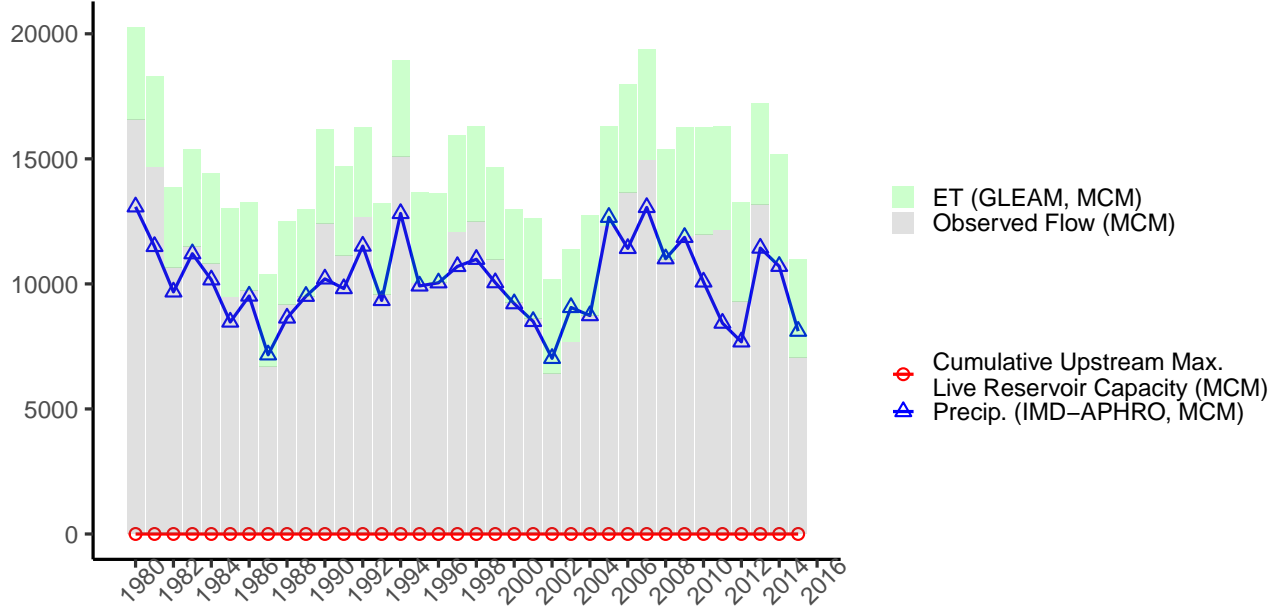

Monsoon (Jun–Sep), Station: Bantwal, River: Nethravathi  
 GHI ID: wfrs\_bantw, Catch. Area: 3295 sq. km

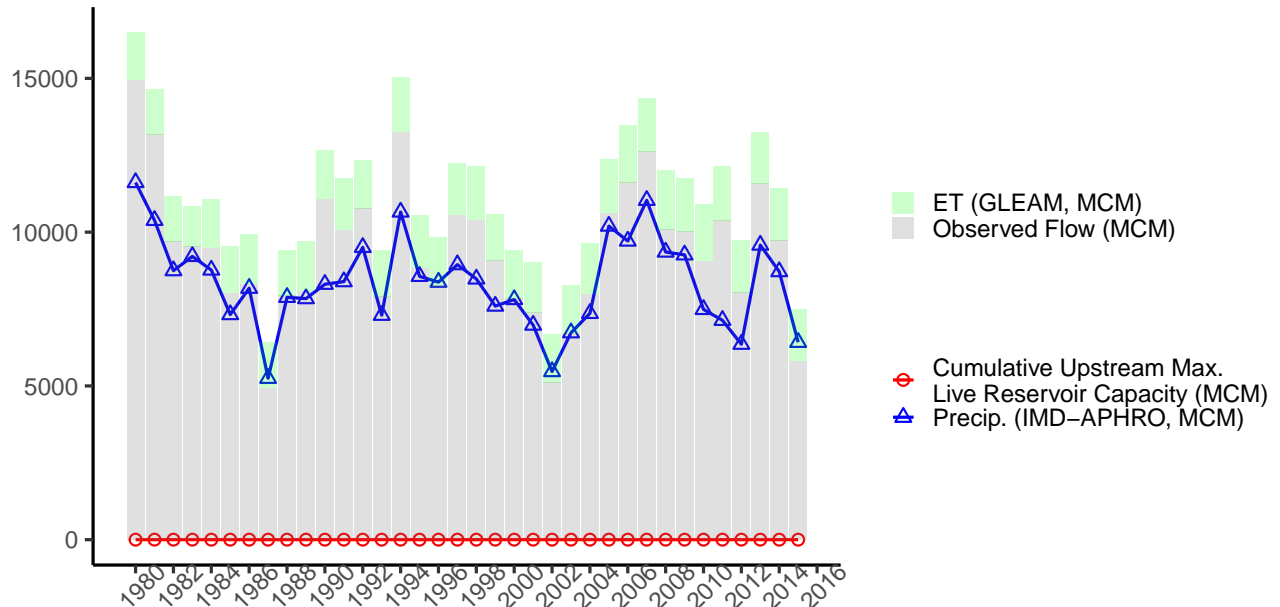

Annual (Jun–May), Station: Halady, River: Halady  
GHI ID: wfrs\_halad, Catch. Area: 566 sq. km

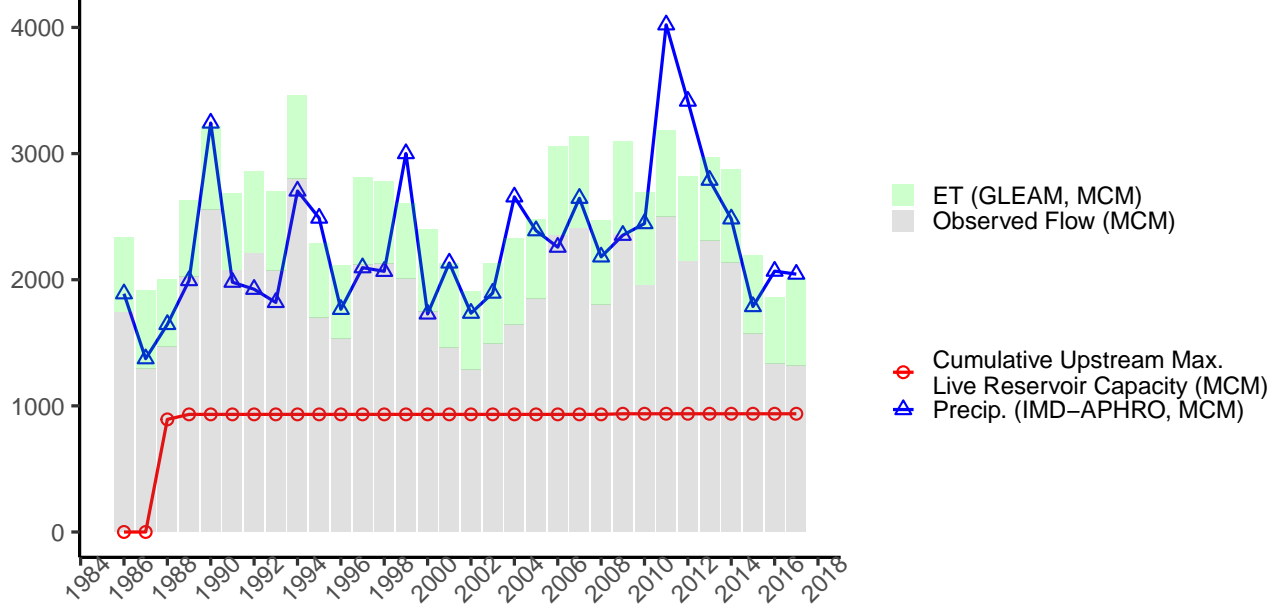

Monsoon (Jun–Sep), Station: Halady, River: Halady  
GHI ID: wfrs\_halad, Catch. Area: 566 sq. km

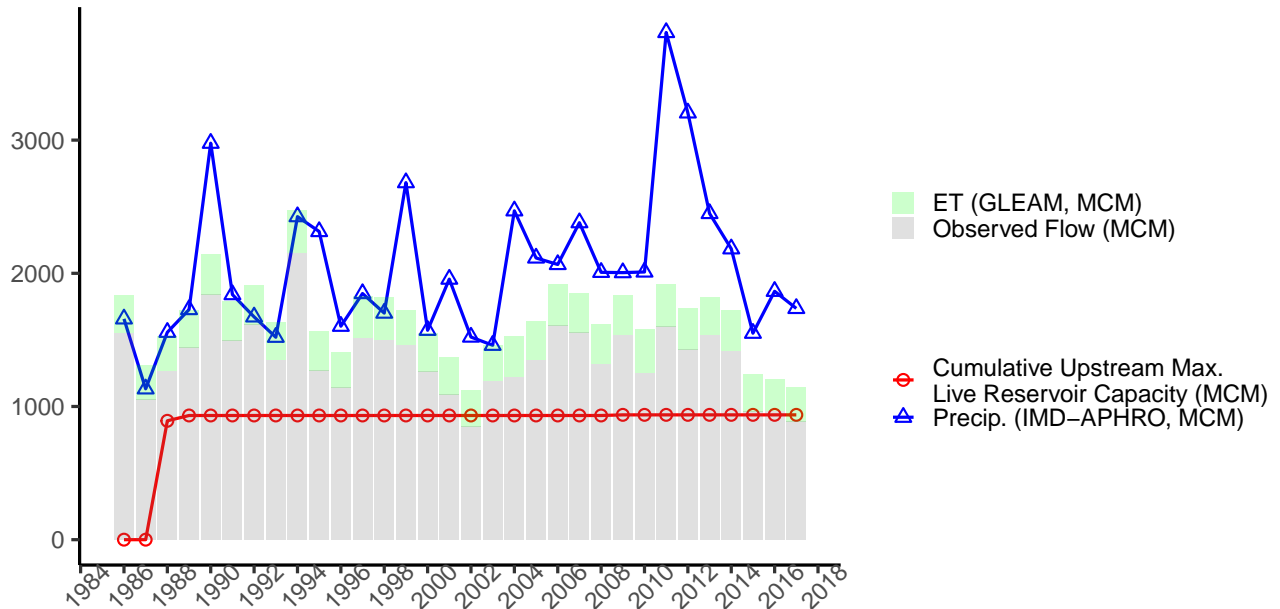

Annual (Jun–May), Station: Kalampur, River: Muvattupuzha/Kaliyar  
 GHI ID: wfrs\_kalam, Catch. Area: 386 sq. km

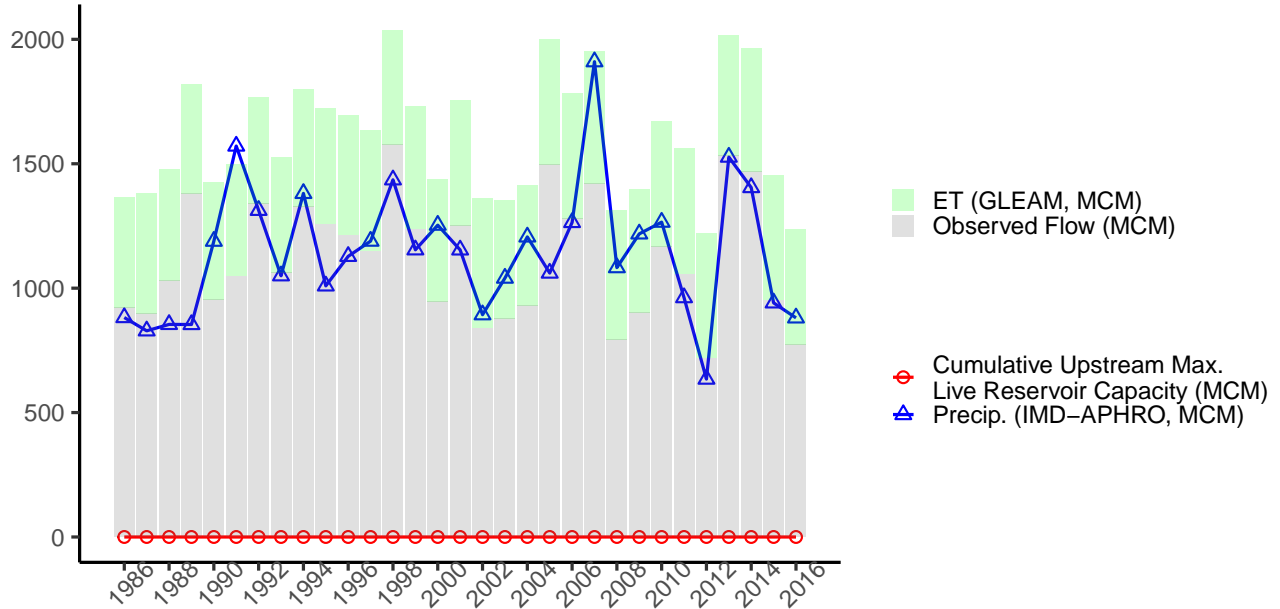

Monsoon (Jun–Sep), Station: Kalampur, River: Muvattupuzha/Kaliyar  
 GHI ID: wfrs\_kalam, Catch. Area: 386 sq. km

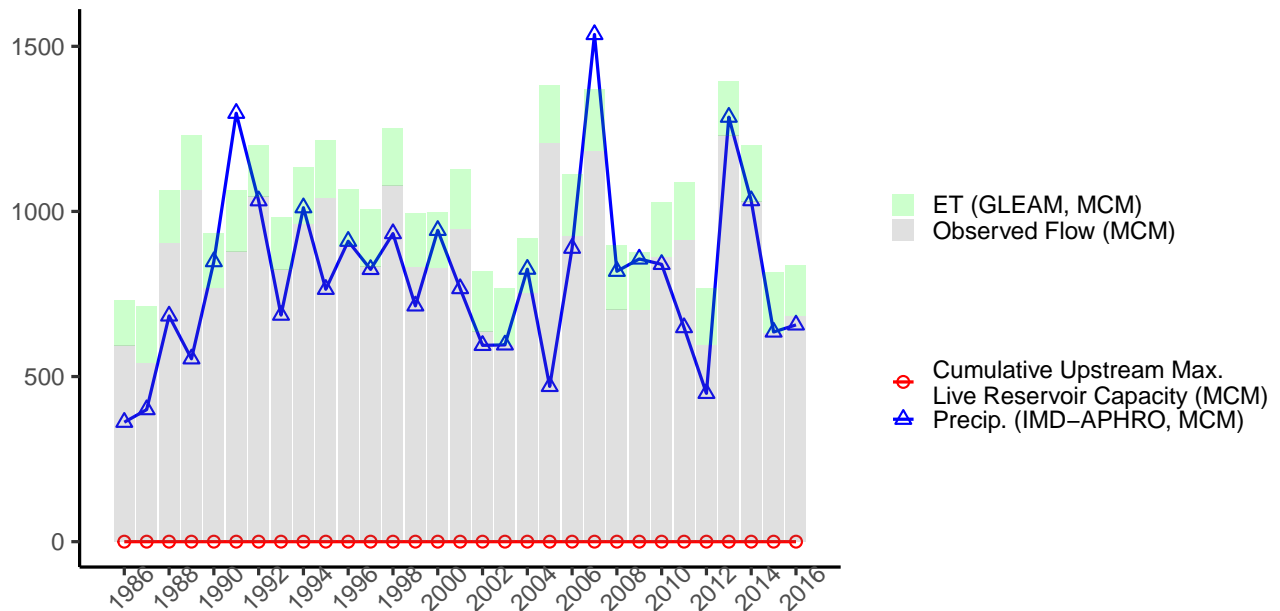



Annual (Jun–May), Station: Kallooppara, River: Pampa/Manimala  
 GHI ID: wfrs\_kallo, Catch. Area: 733 sq. km

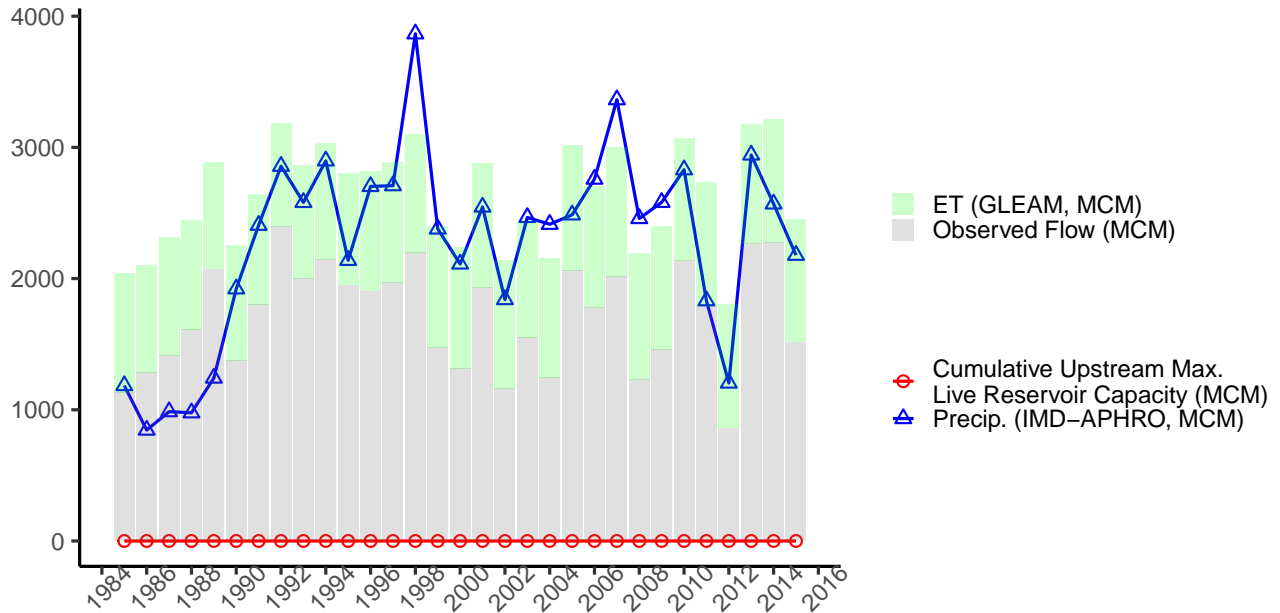

Monsoon (Jun–Sep), Station: Kallooppara, River: Pampa/Manimala  
 GHI ID: wfrs\_kallo, Catch. Area: 733 sq. km

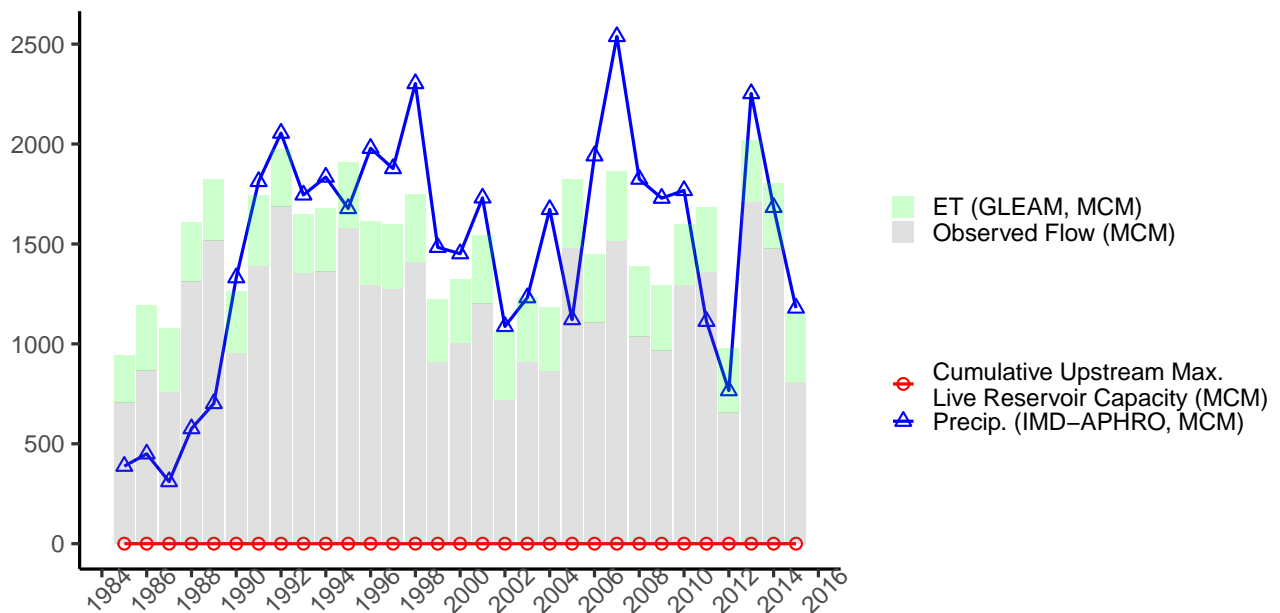

Annual (Jun–May), Station: Karathodu, River: Kadalundi  
GHI ID: wfrs\_karat, Catch. Area: 794 sq. km

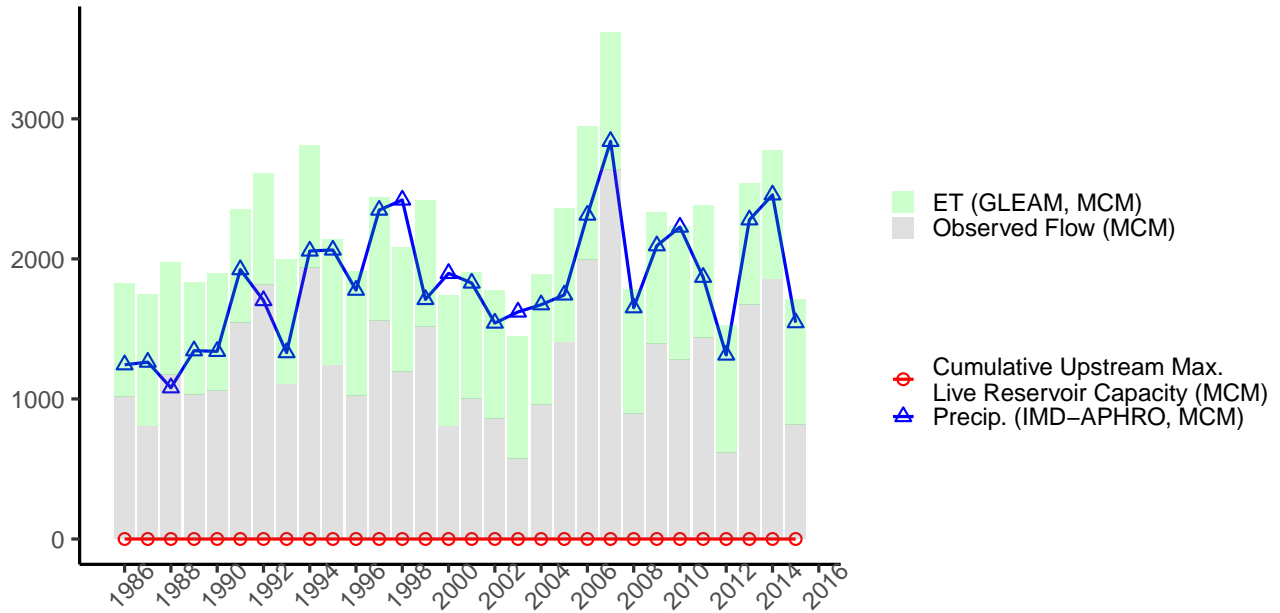

Monsoon (Jun–Sep), Station: Karathodu, River: Kadalundi  
GHI ID: wfrs\_karat, Catch. Area: 794 sq. km

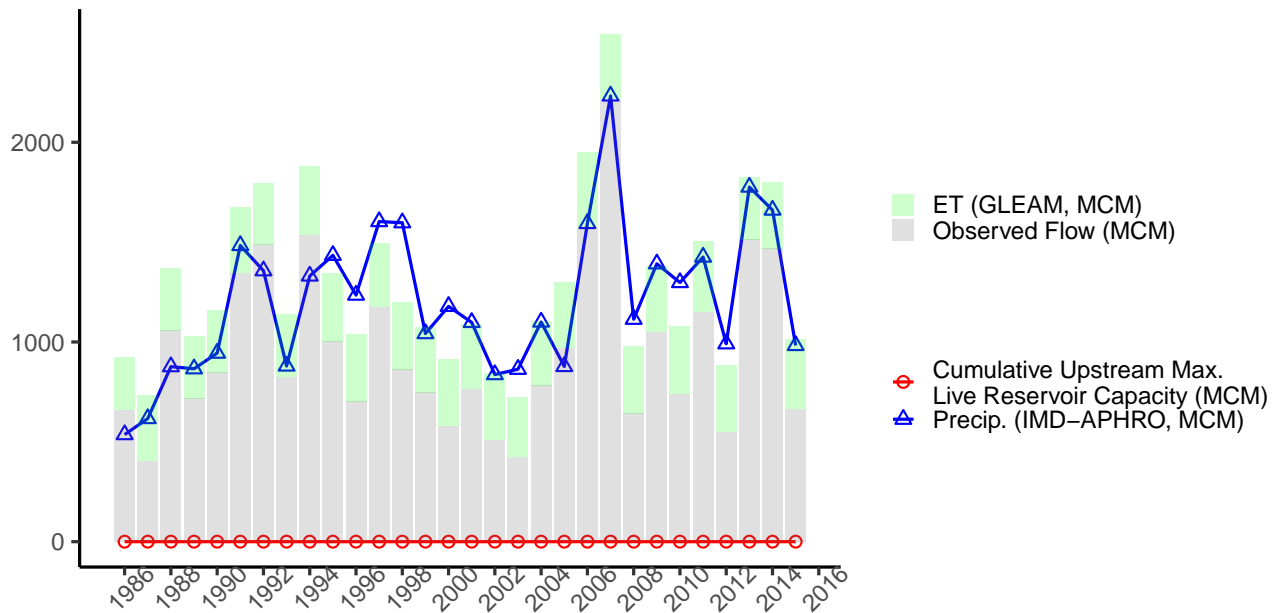

Annual (Jun–May), Station: Kidangoor, River: Meenachil  
GHI ID: wfrs\_kidan, Catch. Area: 618 sq. km

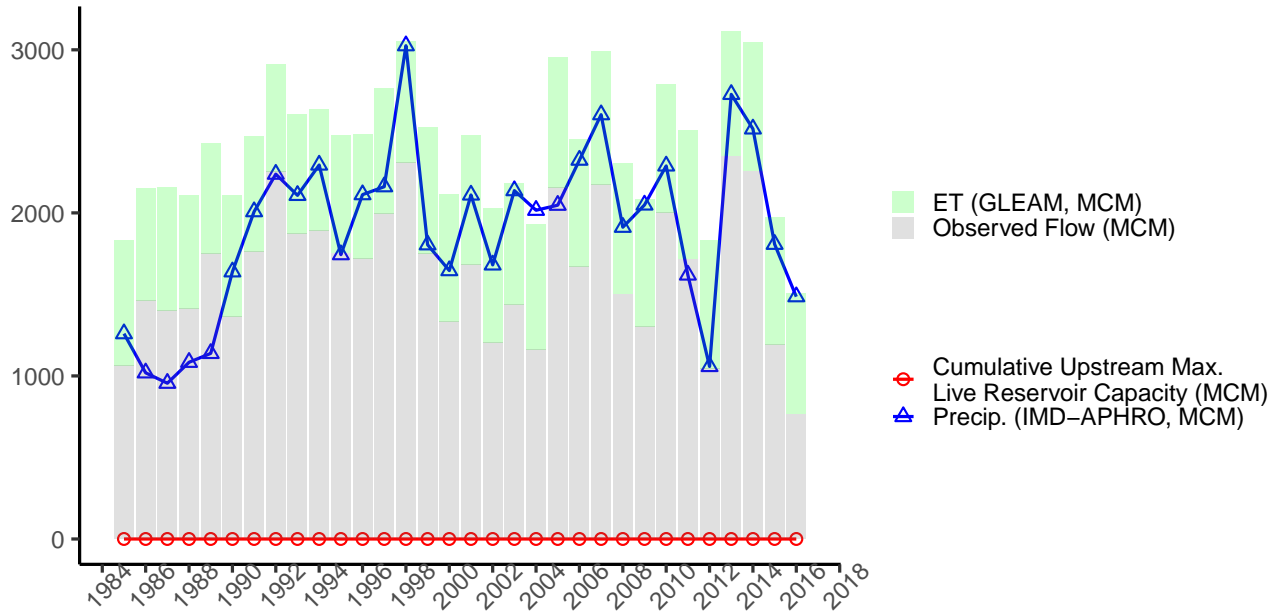

Monsoon (Jun–Sep), Station: Kidangoor, River: Meenachil  
GHI ID: wfrs\_kidan, Catch. Area: 618 sq. km

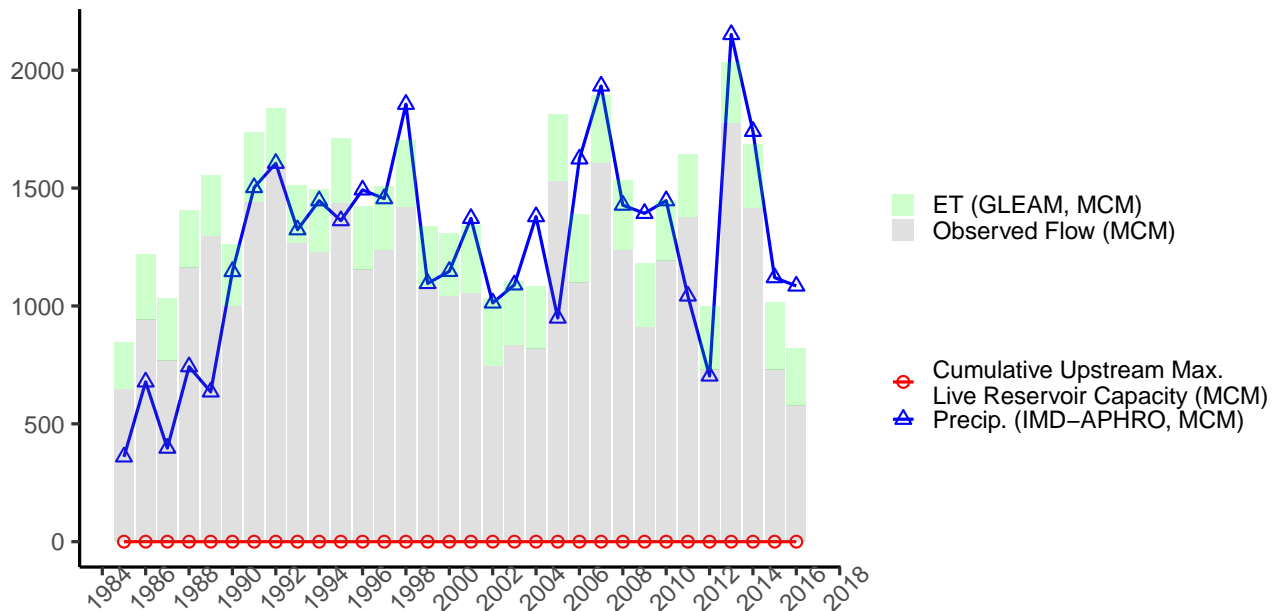

Annual (Jun–May), Station: Kuniyil, River: Chaliyar  
 GHI ID: wfrs\_kuniy, Catch. Area: 2038 sq. km

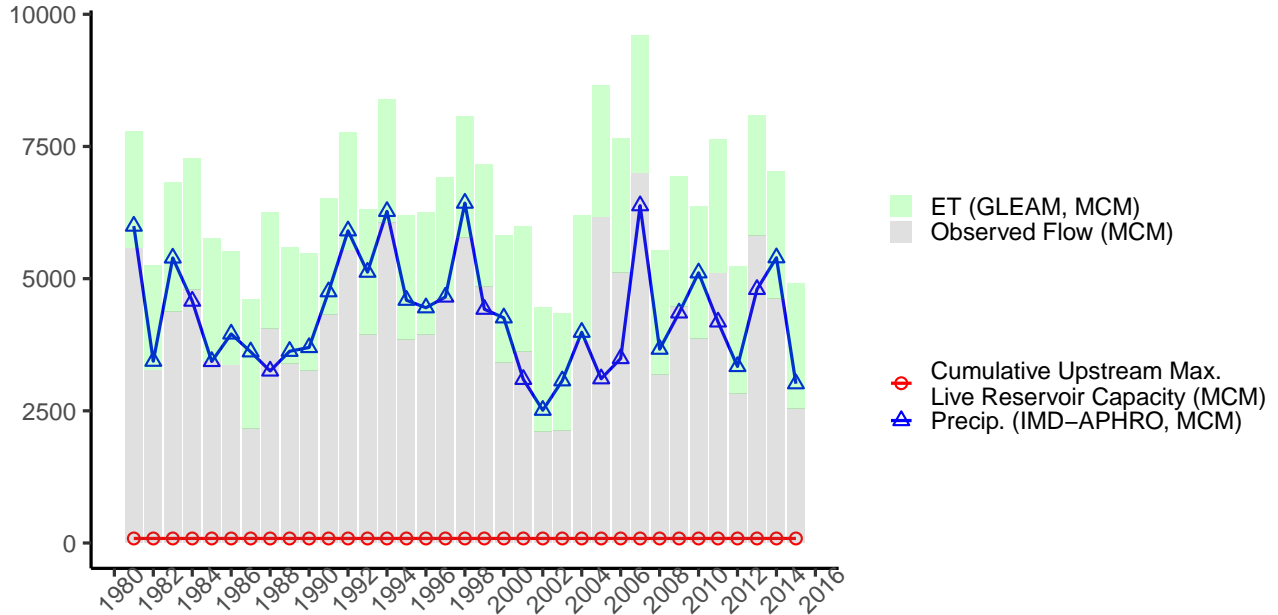

Monsoon (Jun–Sep), Station: Kuniyil, River: Chaliyar  
 GHI ID: wfrs\_kuniy, Catch. Area: 2038 sq. km

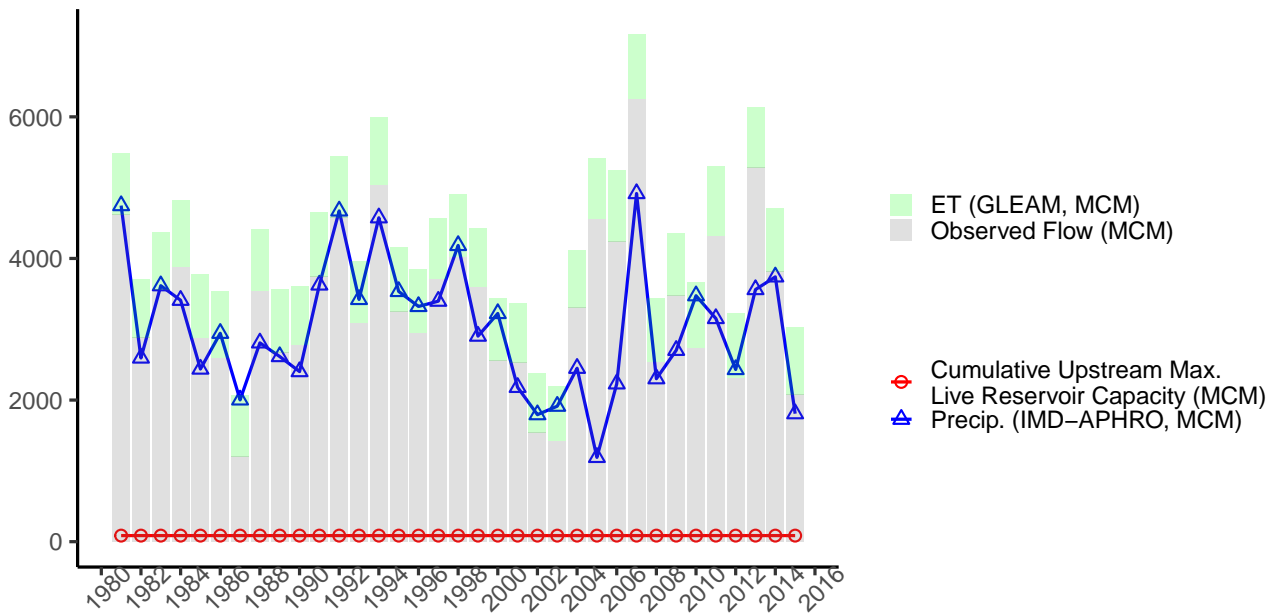

Annual (Jun–May), Station: Malakkara, River: Pampa  
 GHI ID: wfrs\_malak, Catch. Area: 1650 sq. km

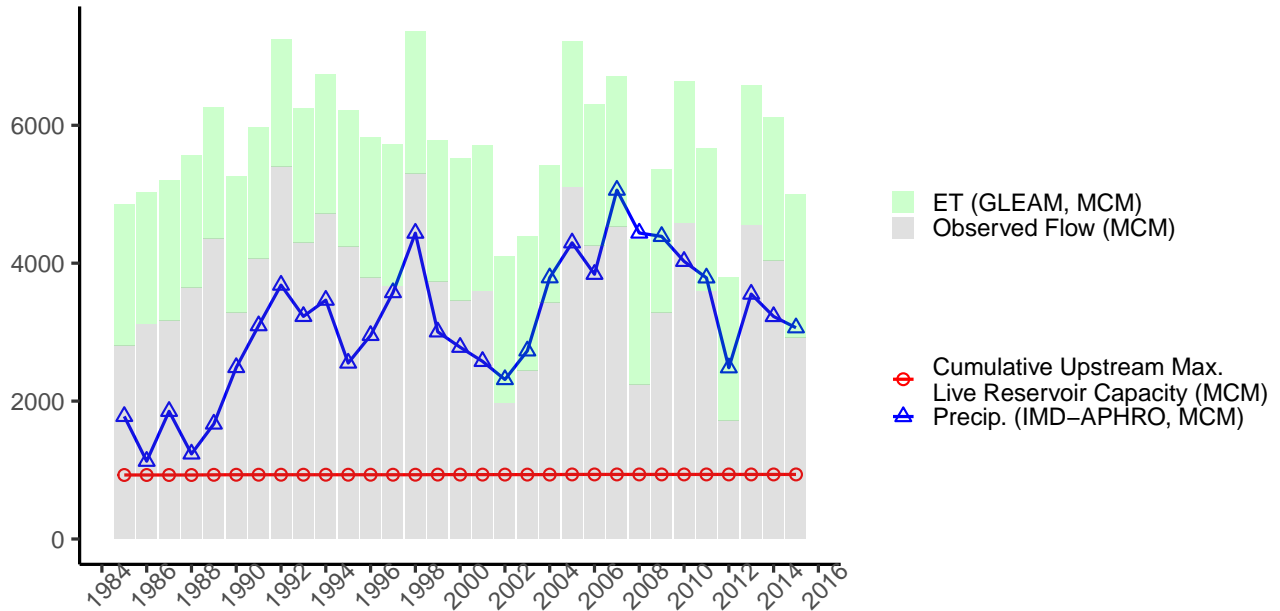

Monsoon (Jun–Sep), Station: Malakkara, River: Pampa  
 GHI ID: wfrs\_malak, Catch. Area: 1650 sq. km

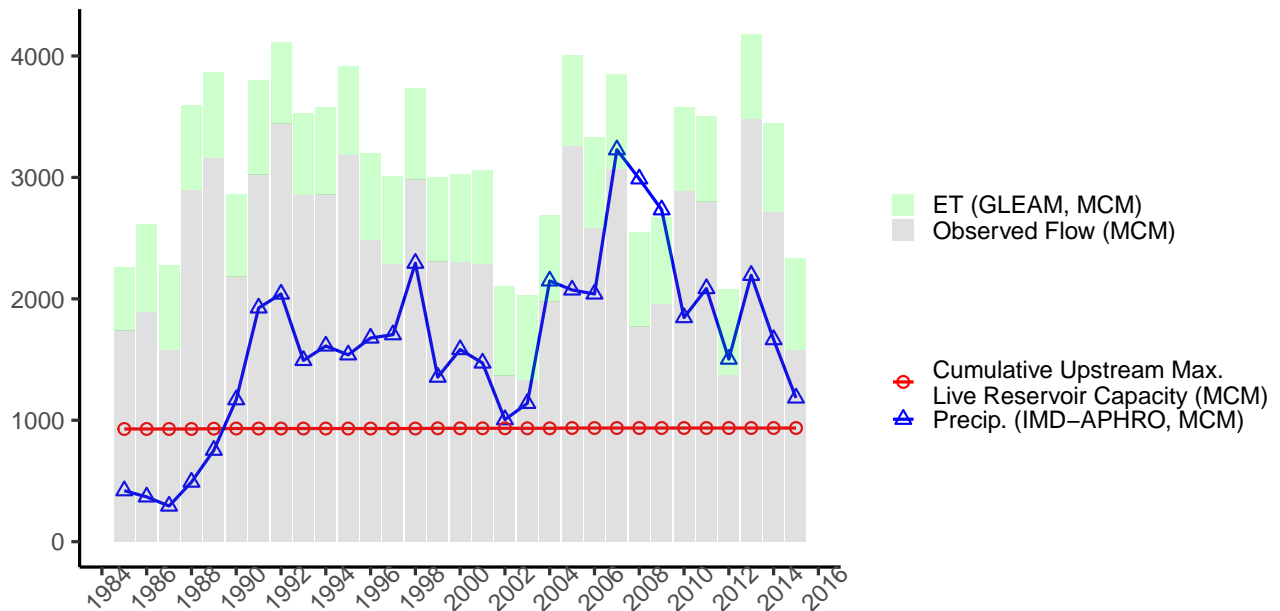

Annual (Jun–May), Station: Neeleswaram, River: Periyar  
 GHI ID: wfrs\_neelee, Catch. Area: 4150 sq. km

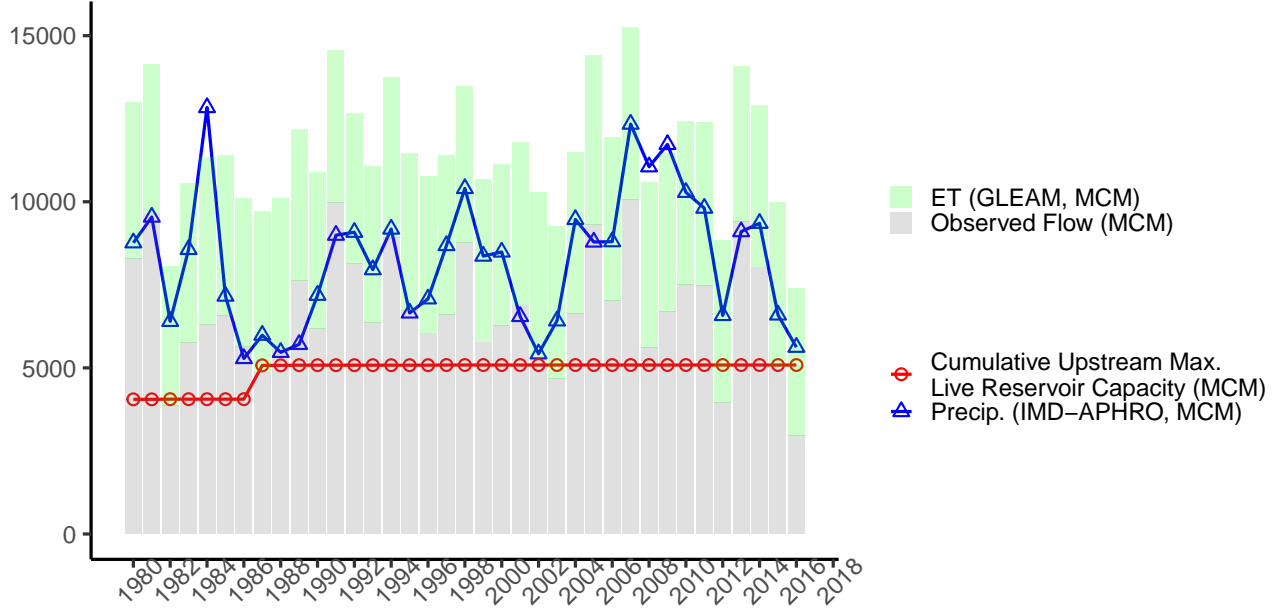

Monsoon (Jun–Sep), Station: Neeleswaram, River: Periyar  
 GHI ID: wfrs\_neelee, Catch. Area: 4150 sq. km

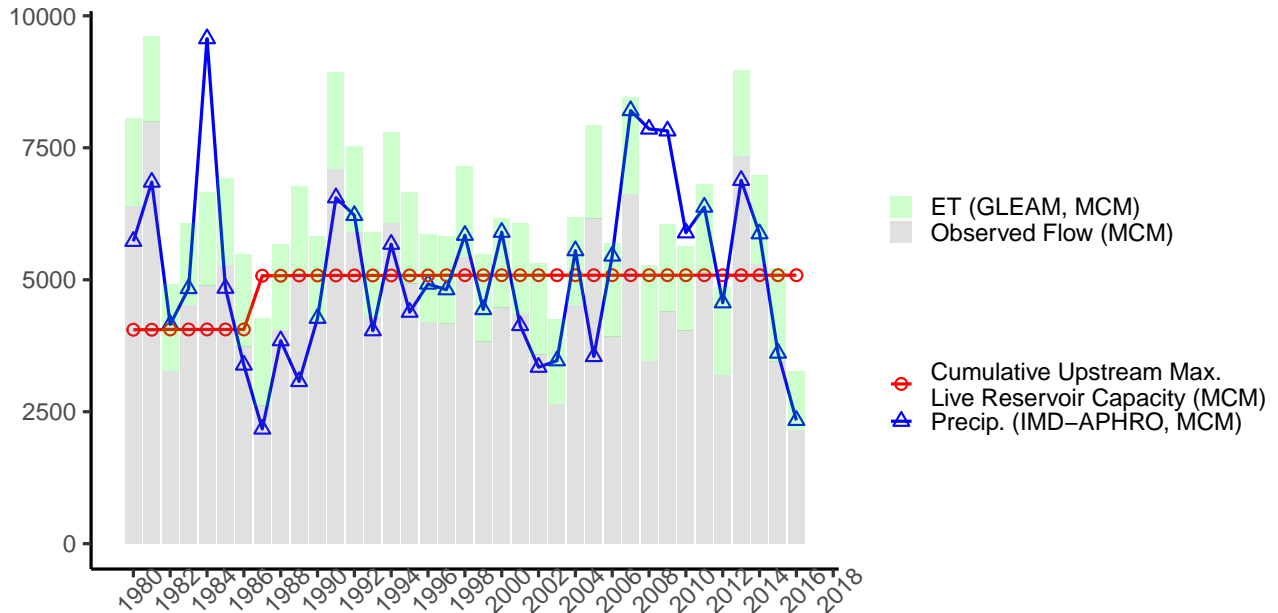

Annual (Jun–May), Station: Pattazhy, River: Kallada  
 GHI ID: wfrs\_patta, Catch. Area: 1221 sq. km

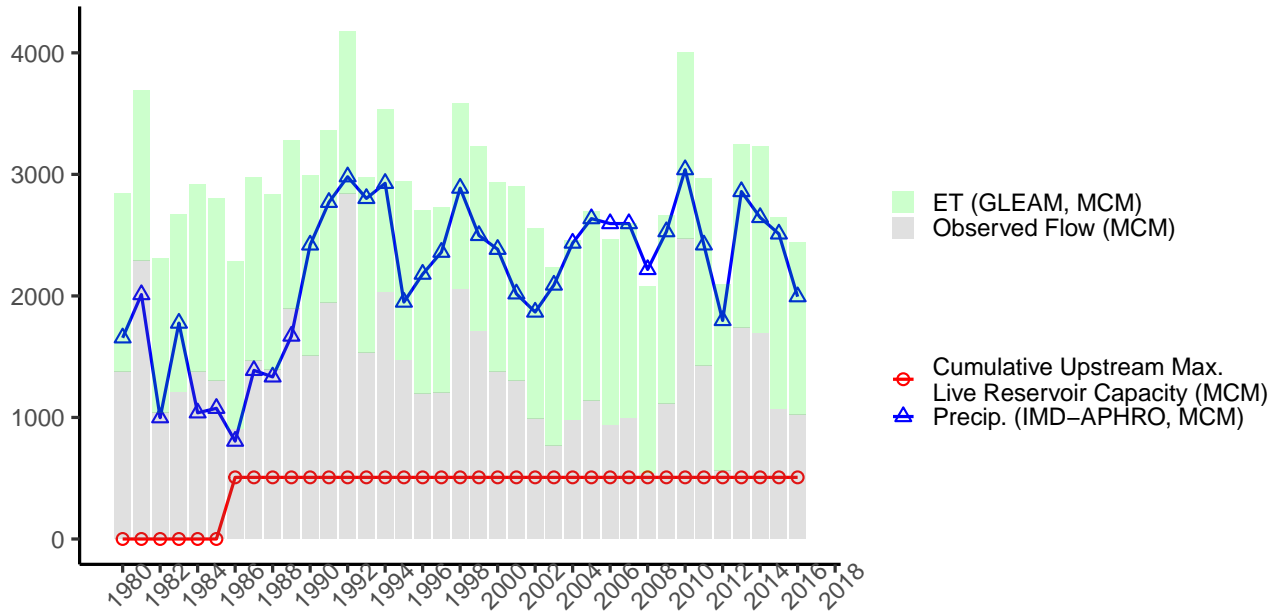

Monsoon (Jun–Sep), Station: Pattazhy, River: Kallada  
 GHI ID: wfrs\_patta, Catch. Area: 1221 sq. km

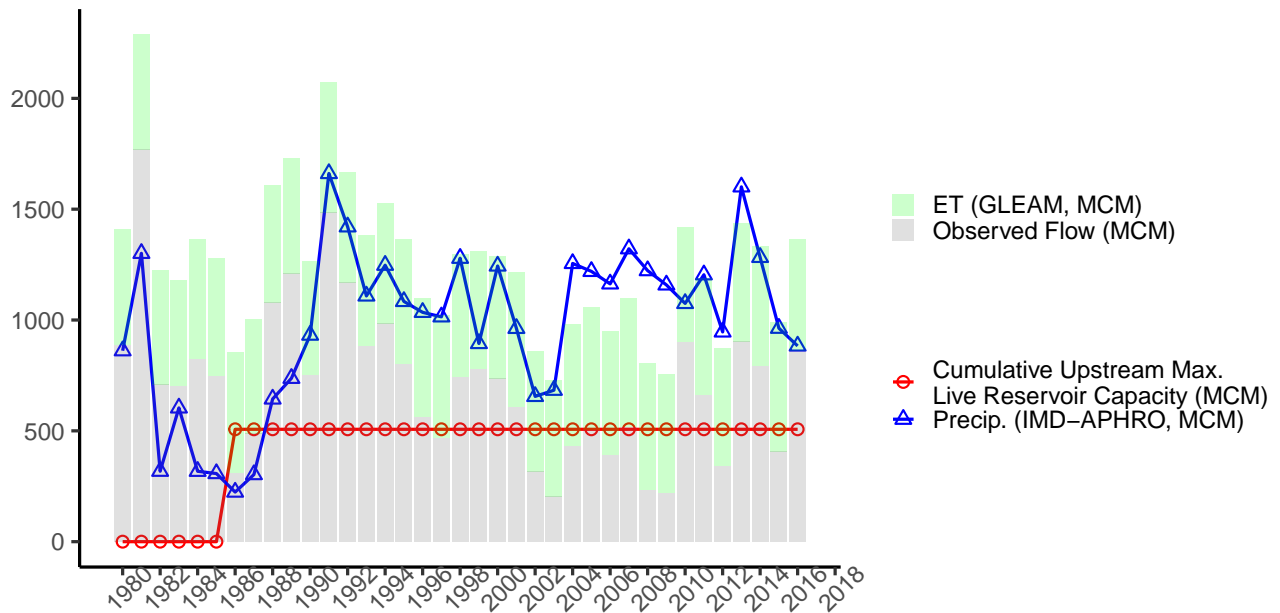

Annual (Jun–May), Station: Perumannu, River: Valapatnam  
 GHI ID: wfrs\_perum, Catch. Area: 1069 sq. km

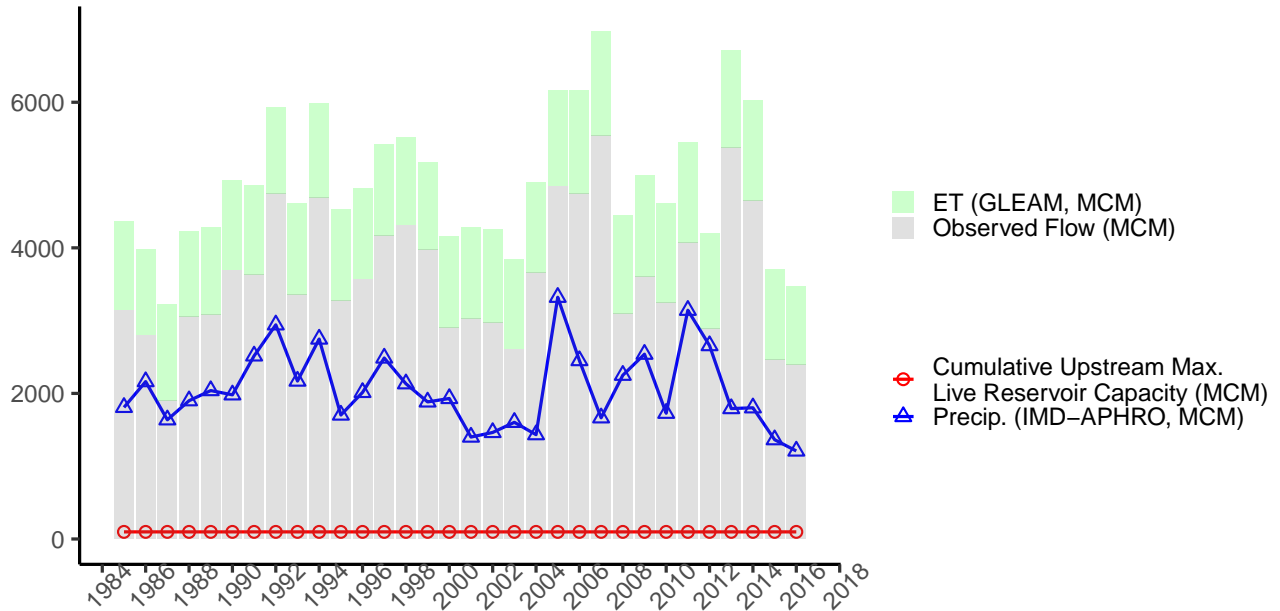

Monsoon (Jun–Sep), Station: Perumannu, River: Valapatnam  
 GHI ID: wfrs\_perum, Catch. Area: 1069 sq. km

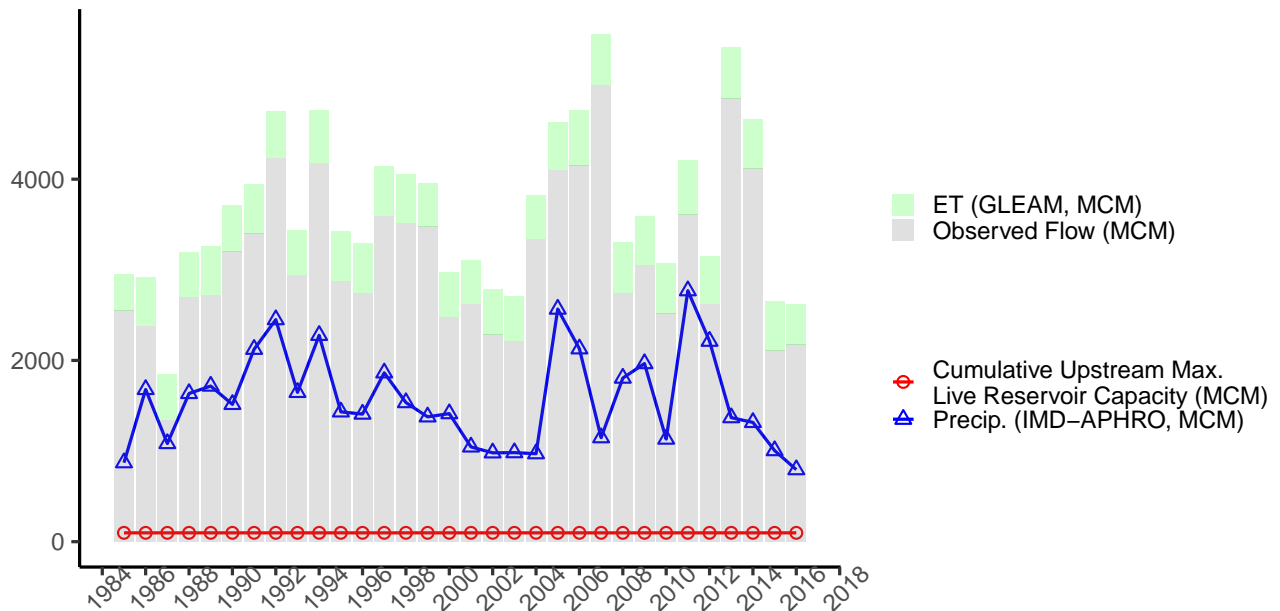



Annual (Jun–May), Station: Pulamanthole, River: Bharathapuzha/Pulanthodu  
 GHI ID: wfrs\_pulam, Catch. Area: 923 sq. km

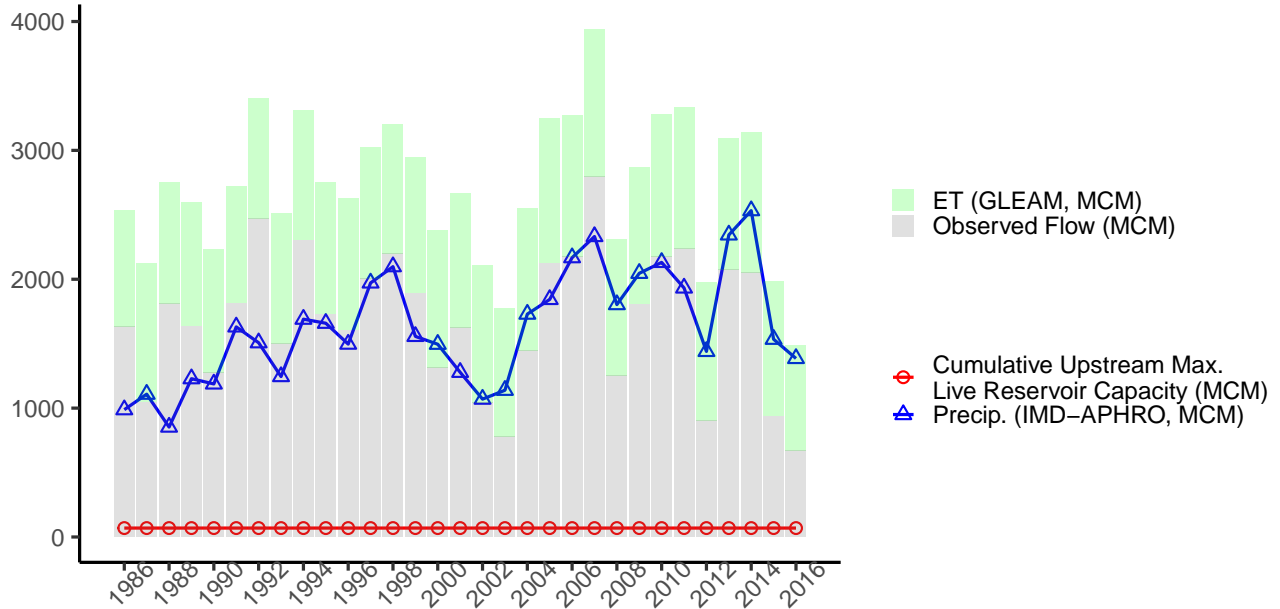

Monsoon (Jun–Sep), Station: Pulamanthole, River: Bharathapuzha/Pulanthodu  
 GHI ID: wfrs\_pulam, Catch. Area: 923 sq. km

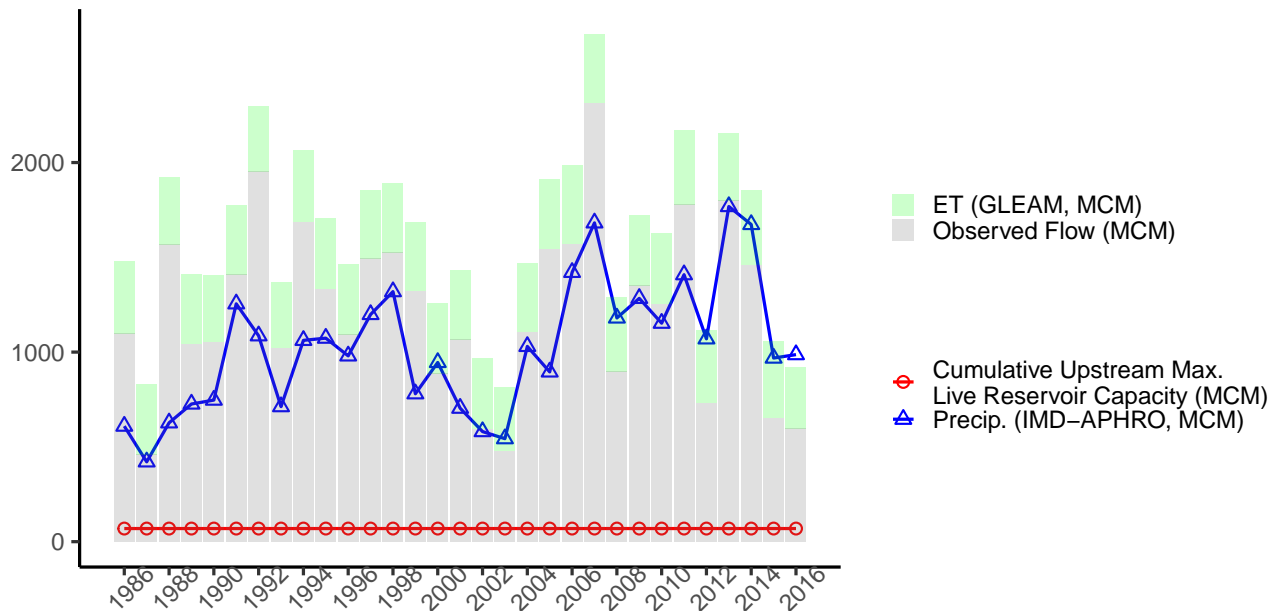

Annual (Jun–May), Station: Ramamangalam, River: Muvattupuzha  
 GHI ID: wfrs\_ramam, Catch. Area: 1482 sq. km

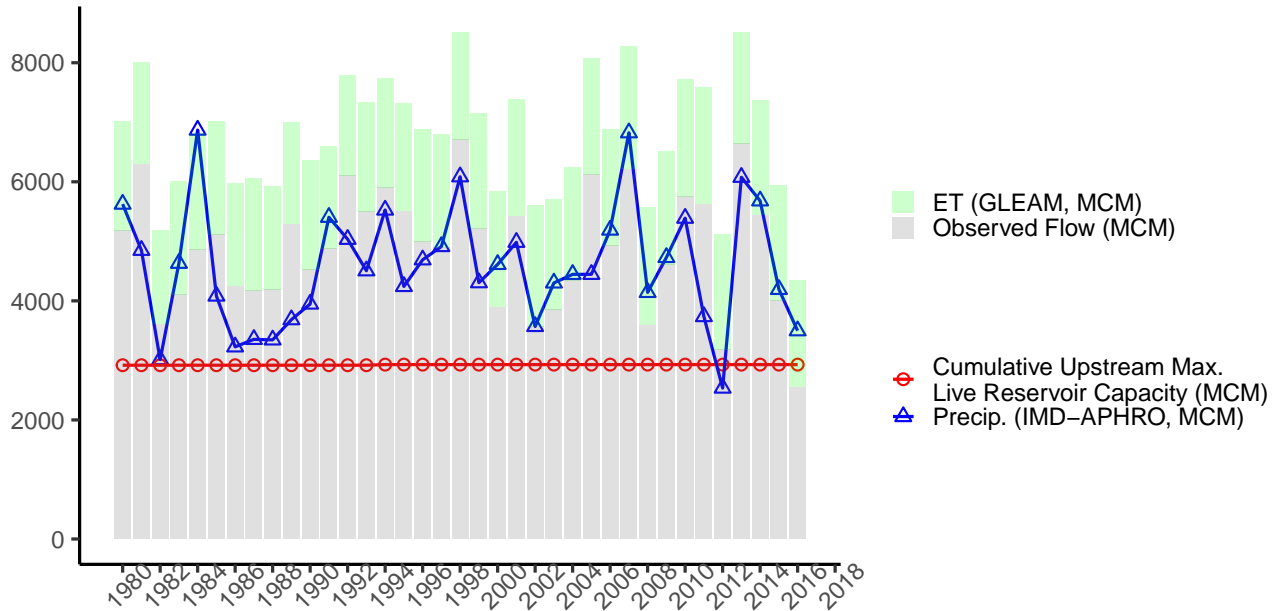

Monsoon (Jun–Sep), Station: Ramamangalam, River: Muvattupuzha  
 GHI ID: wfrs\_ramam, Catch. Area: 1482 sq. km

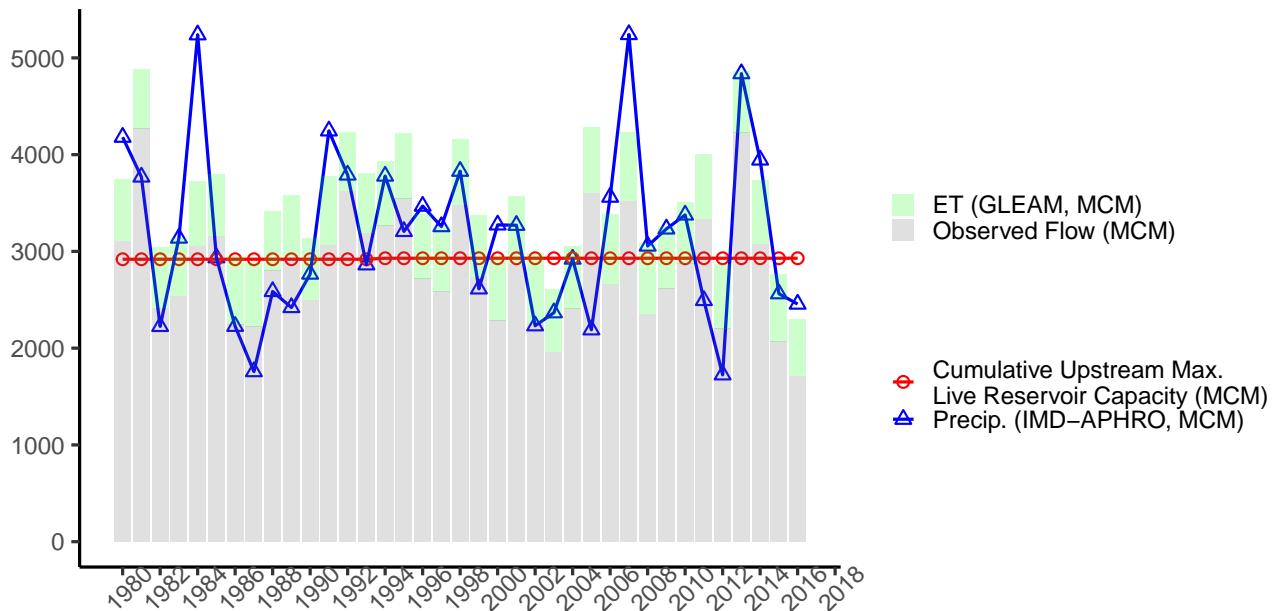

Annual (Jun–May), Station: Thumpamon, River: Pamba/Achankovil  
 GHI ID: wfrs\_thump, Catch. Area: 839 sq. km

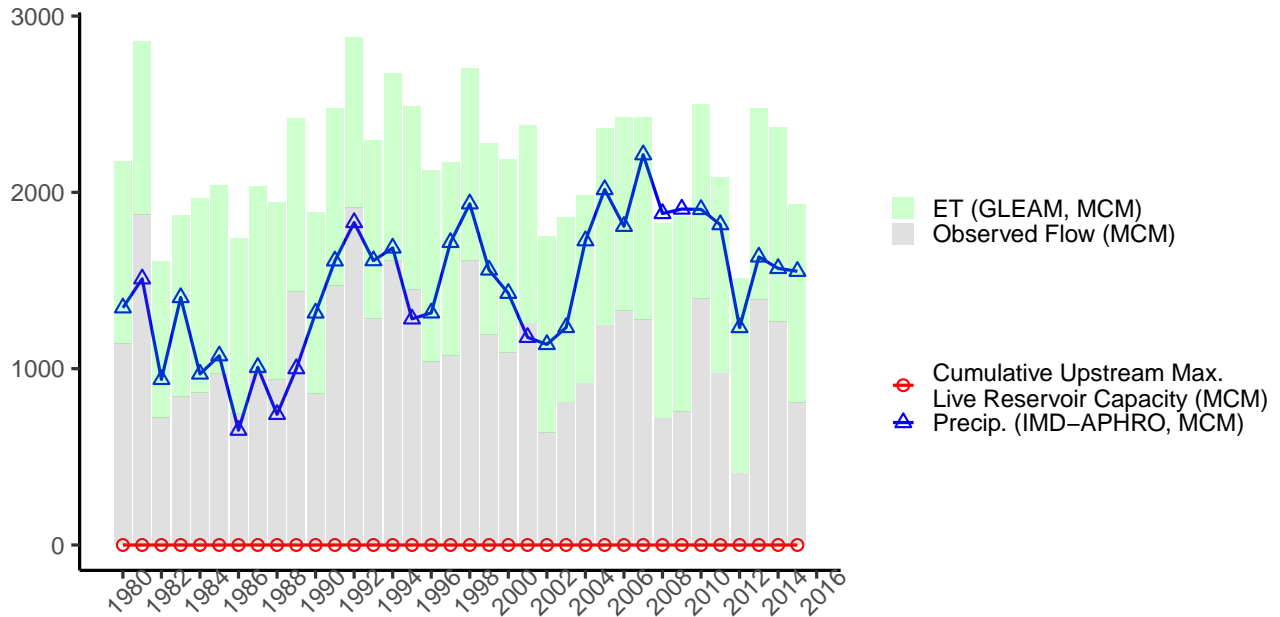

Monsoon (Jun–Sep), Station: Thumpamon, River: Pamba/Achankovil  
 GHI ID: wfrs\_thump, Catch. Area: 839 sq. km

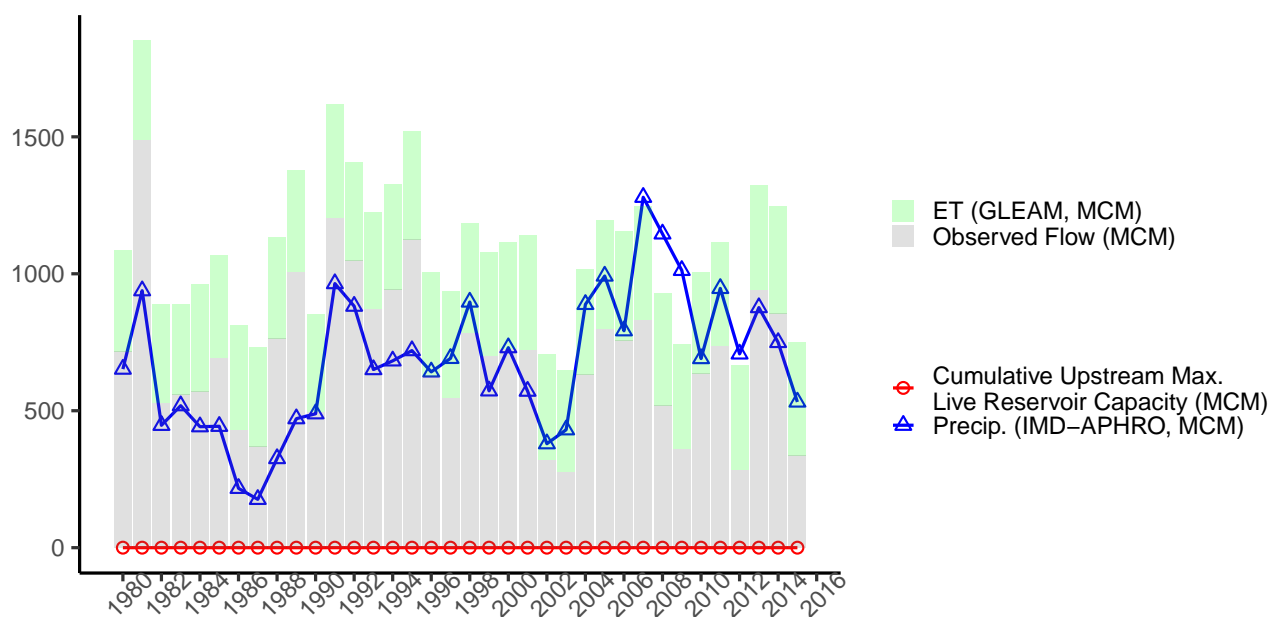

Annual (Jun–May), Station: Yennehole, River: Swarna  
GHI ID: wfrs\_yenne, Catch. Area: 357 sq. km

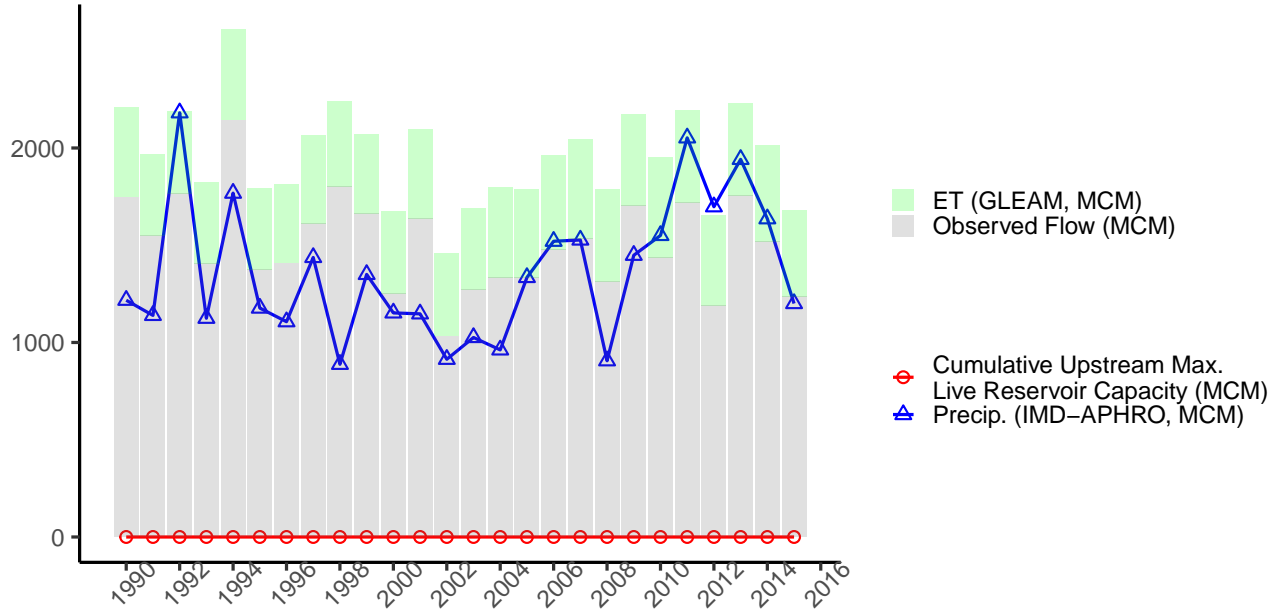

Monsoon (Jun–Sep), Station: Yennehole, River: Swarna  
GHI ID: wfrs\_yenne, Catch. Area: 357 sq. km

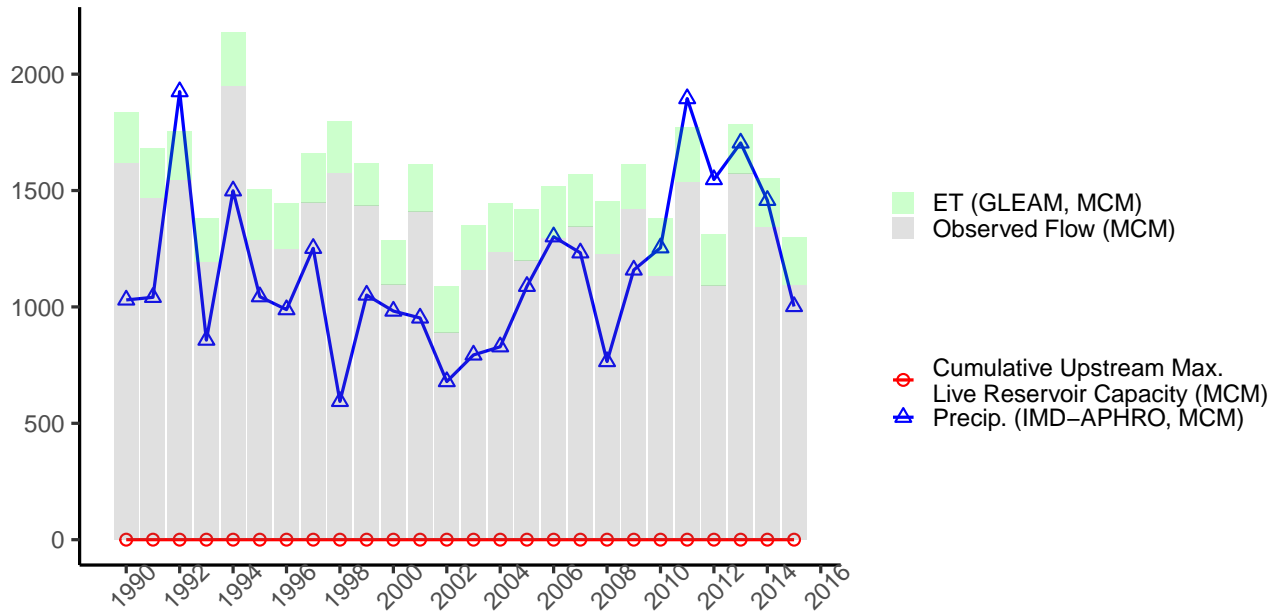

Annual (Jun–May), Station: Anna Purna Ghat, River: Barak  
GHI ID: gbmx\_annap, Catch. Area: 19235 sq. km

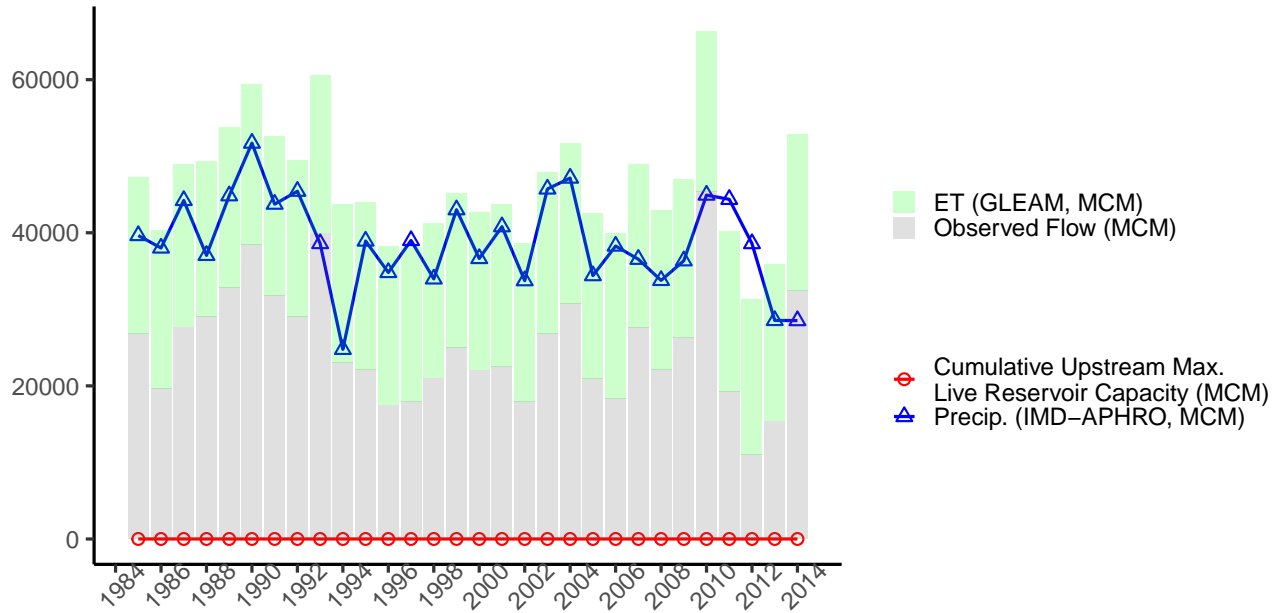

Annual (Jun–May), Station: Pancharatna, River: Brahmaputra  
GHI ID: gbm\_x\_panch, Catch. Area: 458992 sq. km

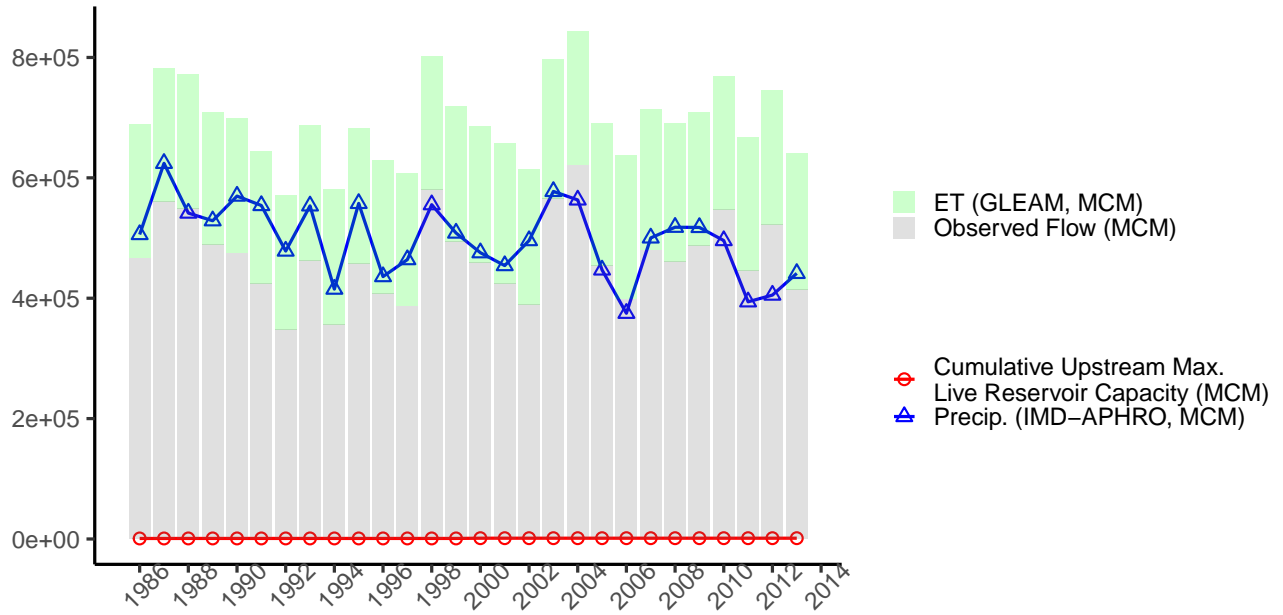

Annual (Jun–May), Station: Dabri, River: Ganga/Ramganga  
GHI ID: gbm\_x\_dabri, Catch. Area: 24606 sq. km

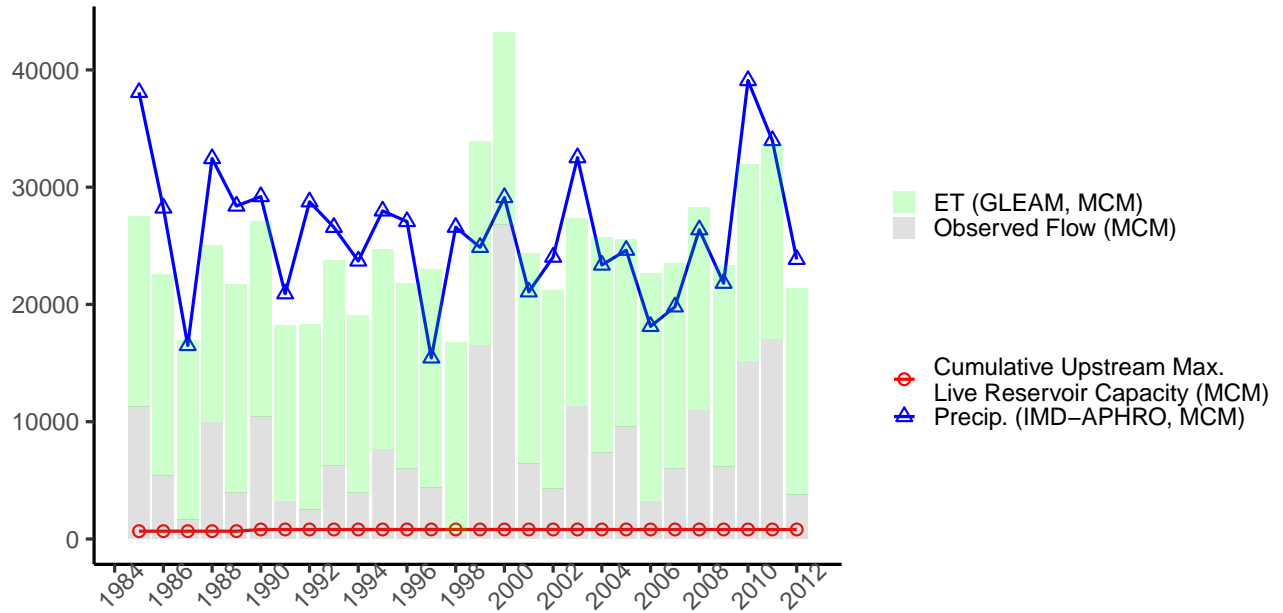

Annual (Jun–May), Station: Tulargram, River: Sonai  
GHI ID: gbm\_x\_tular, Catch. Area: 3182 sq. km

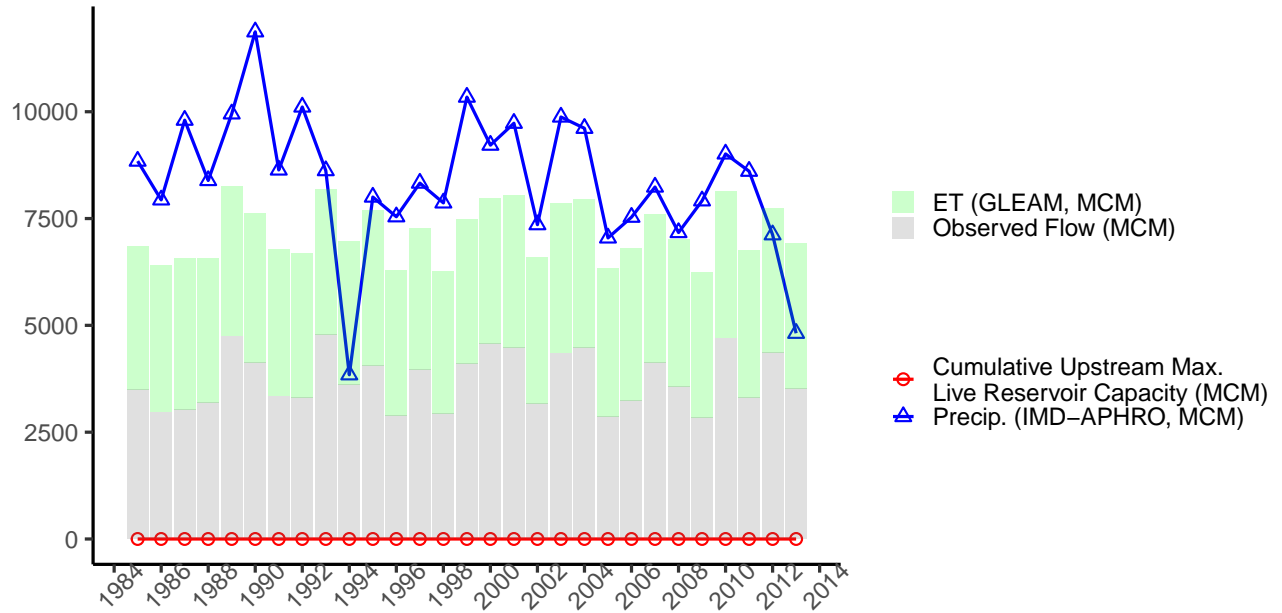



Annual (Jun–May), Station: Cherribeda, River: Godavari/Indravati/Bardha  
 GHI ID: goda\_cherr, Catch. Area: 1026 sq. km

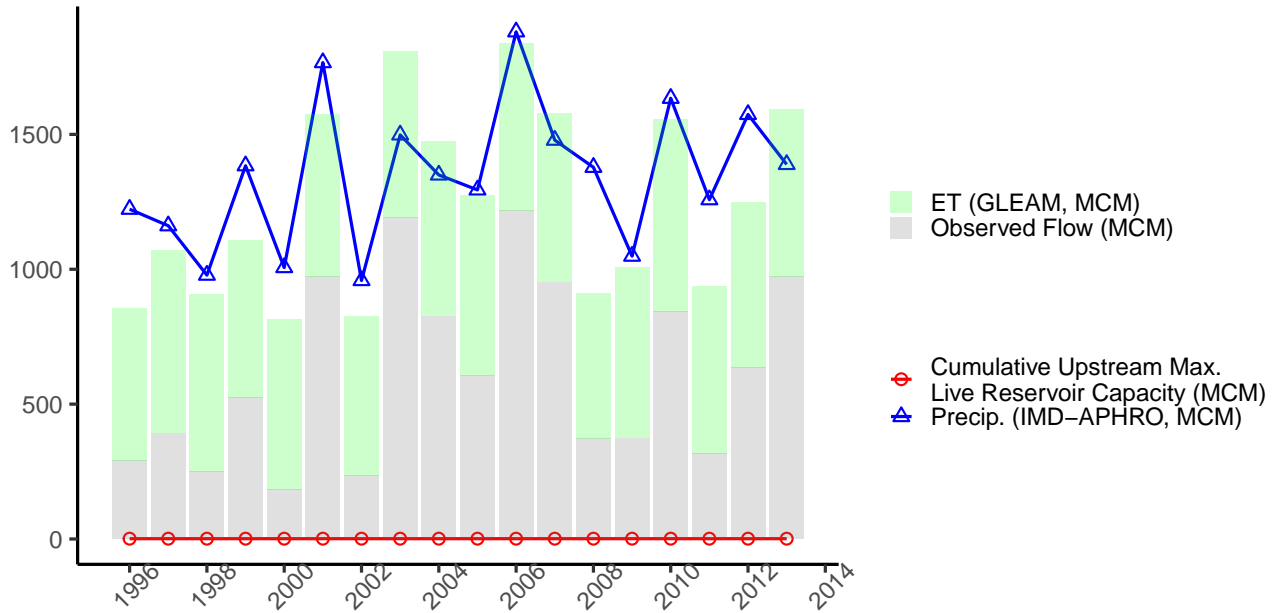

Monsoon (Jun–Sep), Station: Cherribeda, River: Godavari/Indravati/Bardha  
 GHI ID: goda\_cherr, Catch. Area: 1026 sq. km

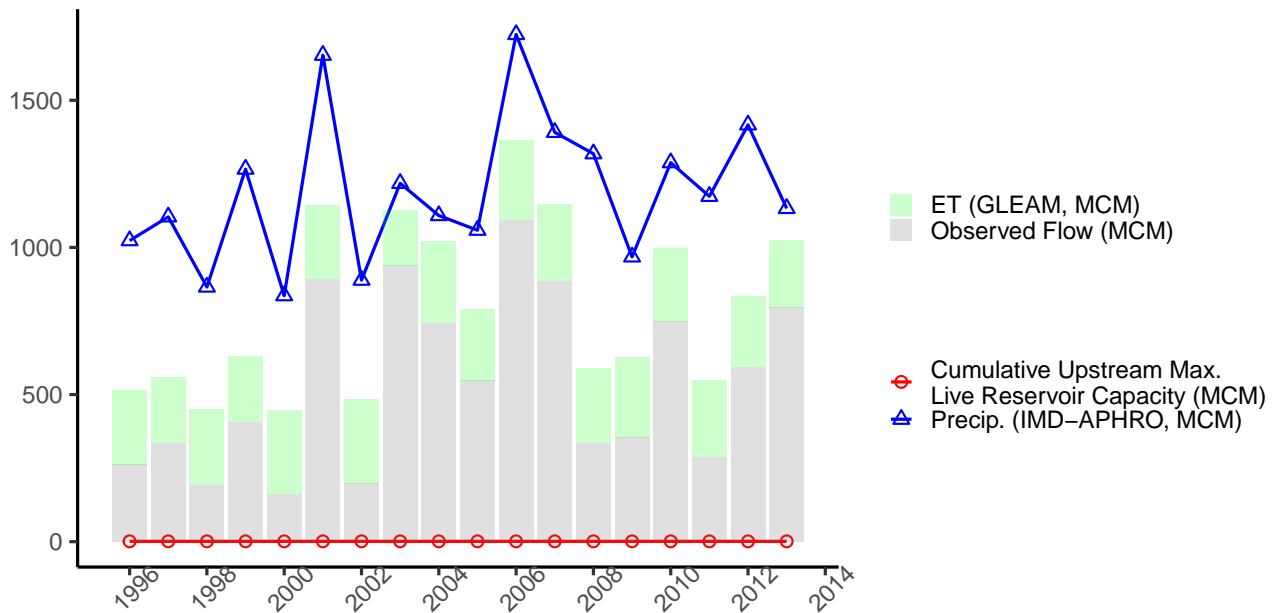

Annual (Jun–May), Station: Konta, River: Godavari/Sabari  
GHI ID: goda\_konta, Catch. Area: 20334 sq. km

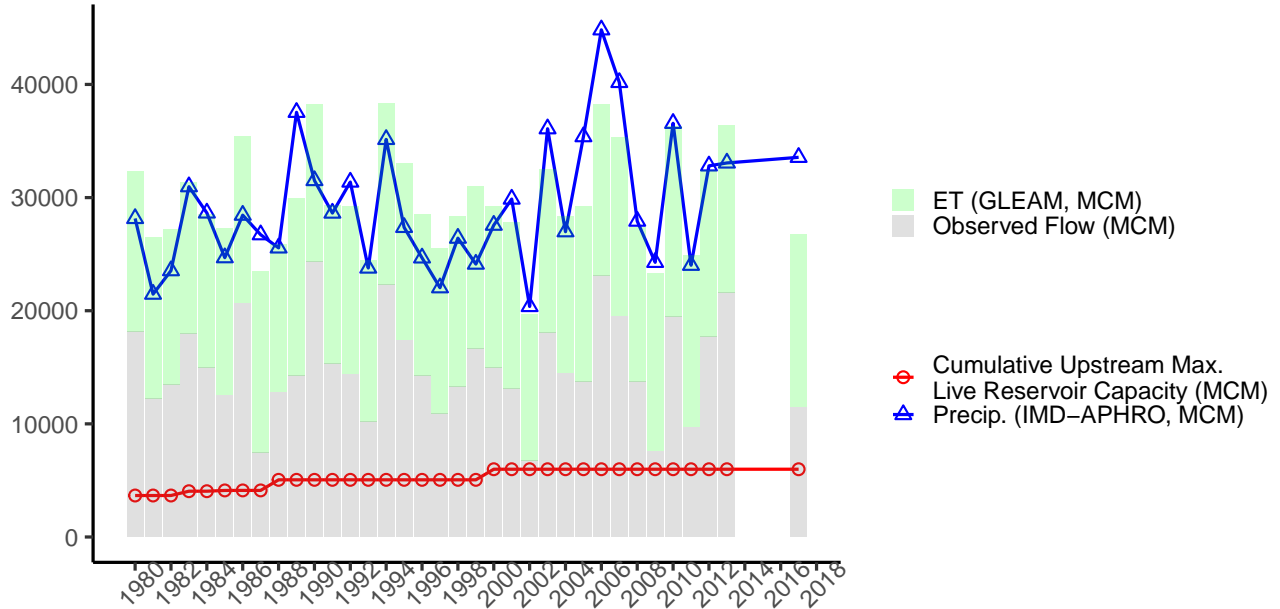

Monsoon (Jun–Sep), Station: Konta, River: Godavari/Sabari  
GHI ID: goda\_konta, Catch. Area: 20334 sq. km

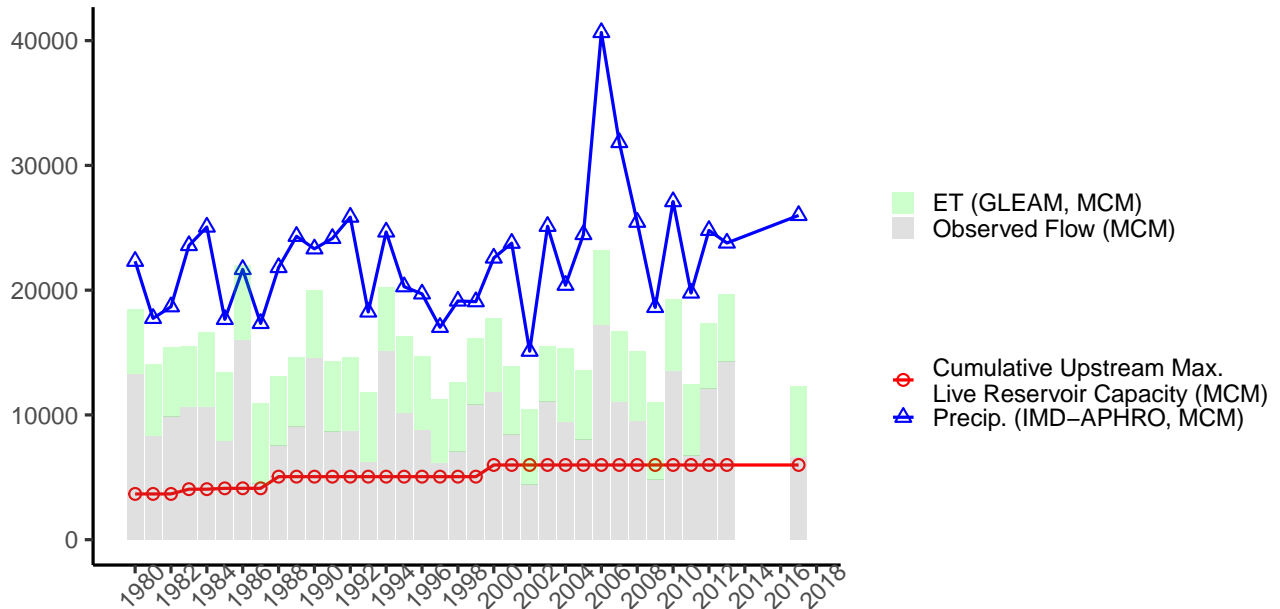

Annual (Jun–May), Station: Nowrangpur, River: Godavari/Indravati  
 GHI ID: goda\_nowra, Catch. Area: 3661 sq. km

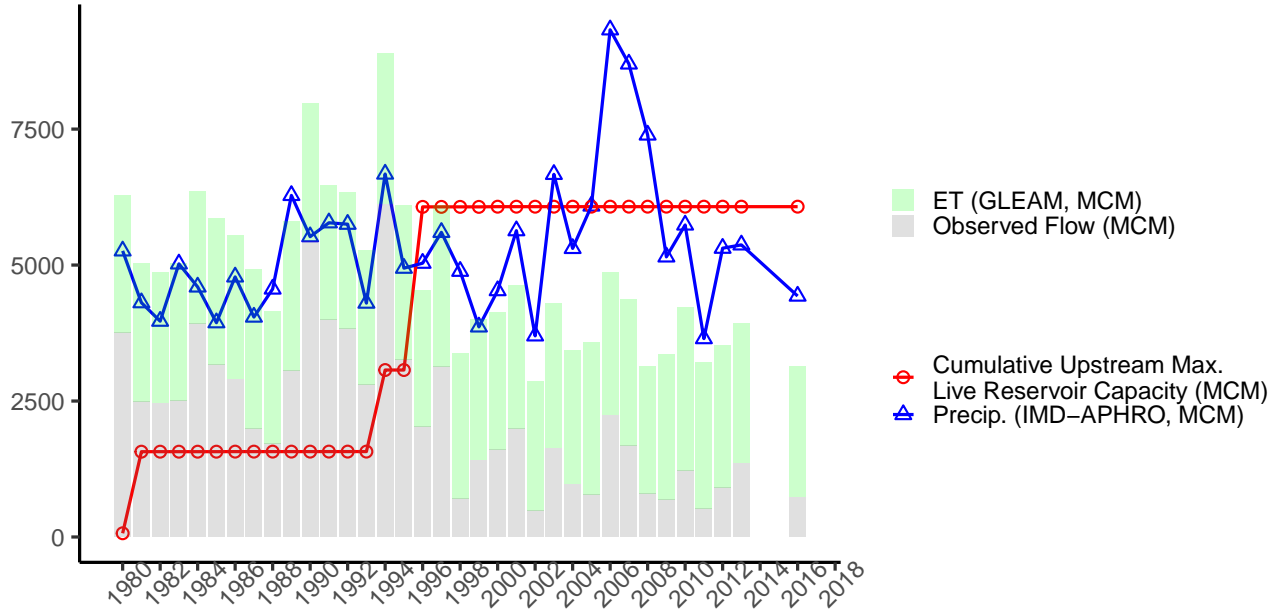

Monsoon (Jun–Sep), Station: Nowrangpur, River: Godavari/Indravati  
 GHI ID: goda\_nowra, Catch. Area: 3661 sq. km

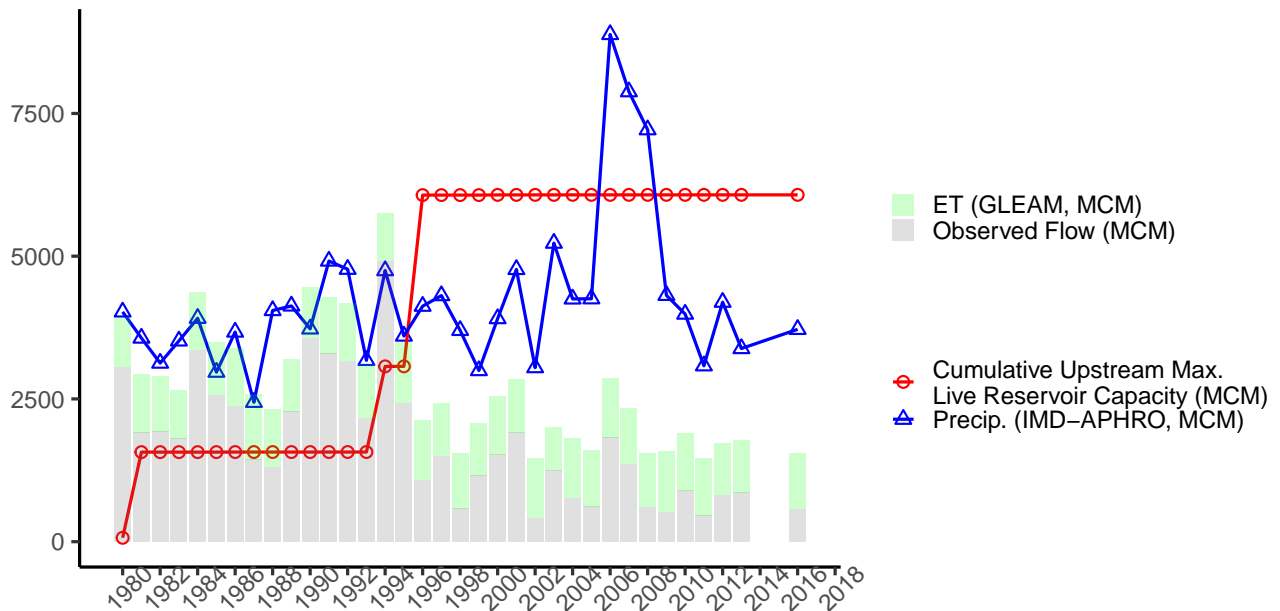

Annual (Jun–May), Station: Rajegaon, River: Godavari/Pranhita/Bagh  
 GHI ID: goda\_rajeg, Catch. Area: 5403 sq. km

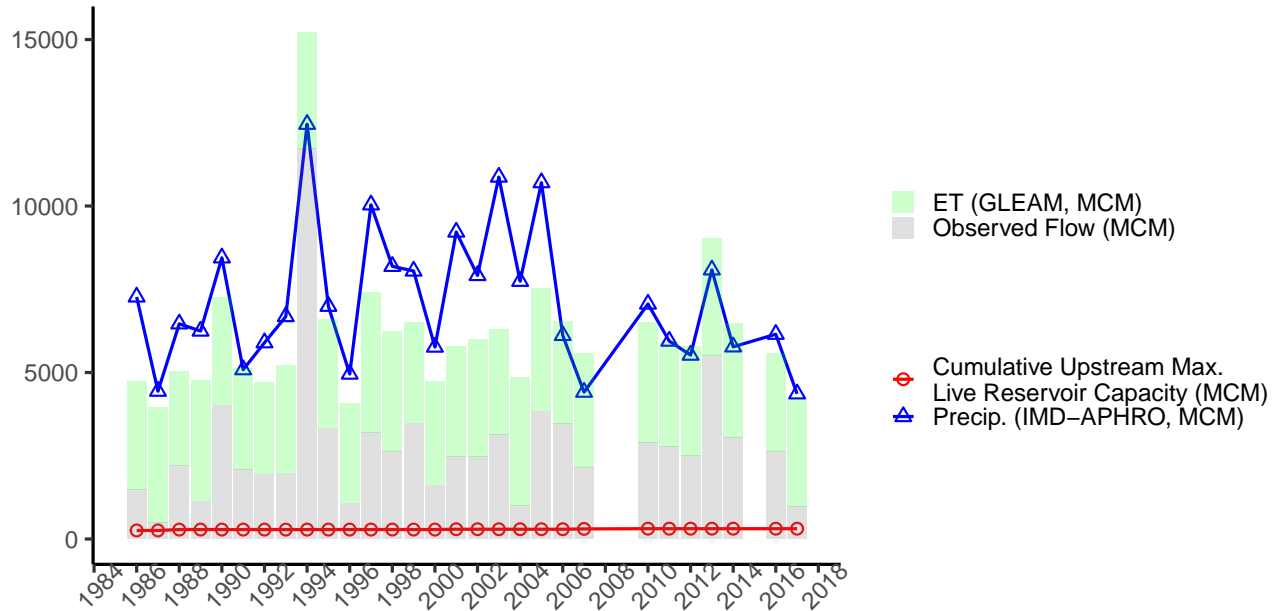

Monsoon (Jun–Sep), Station: Rajegaon, River: Godavari/Pranhita/Bagh  
 GHI ID: goda\_rajeg, Catch. Area: 5403 sq. km

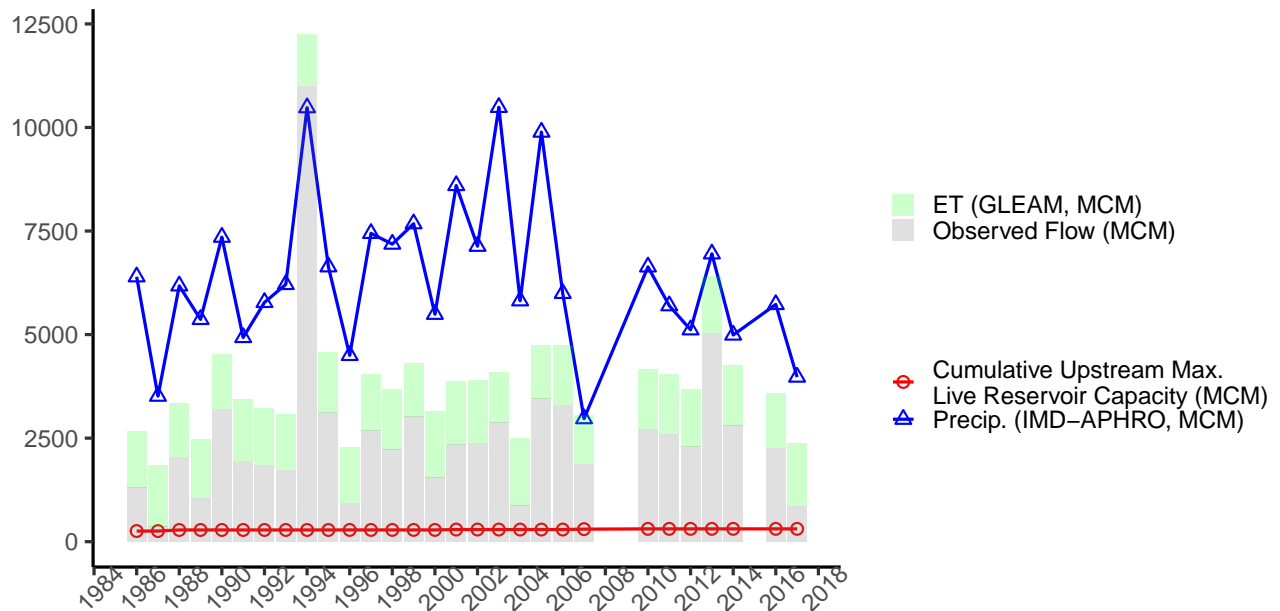

Annual (Jun–May), Station: Byaladahalli, River: Krishna/Tungabhadra/Tunga  
 GHI ID: kris\_byala, Catch. Area: 2508 sq. km

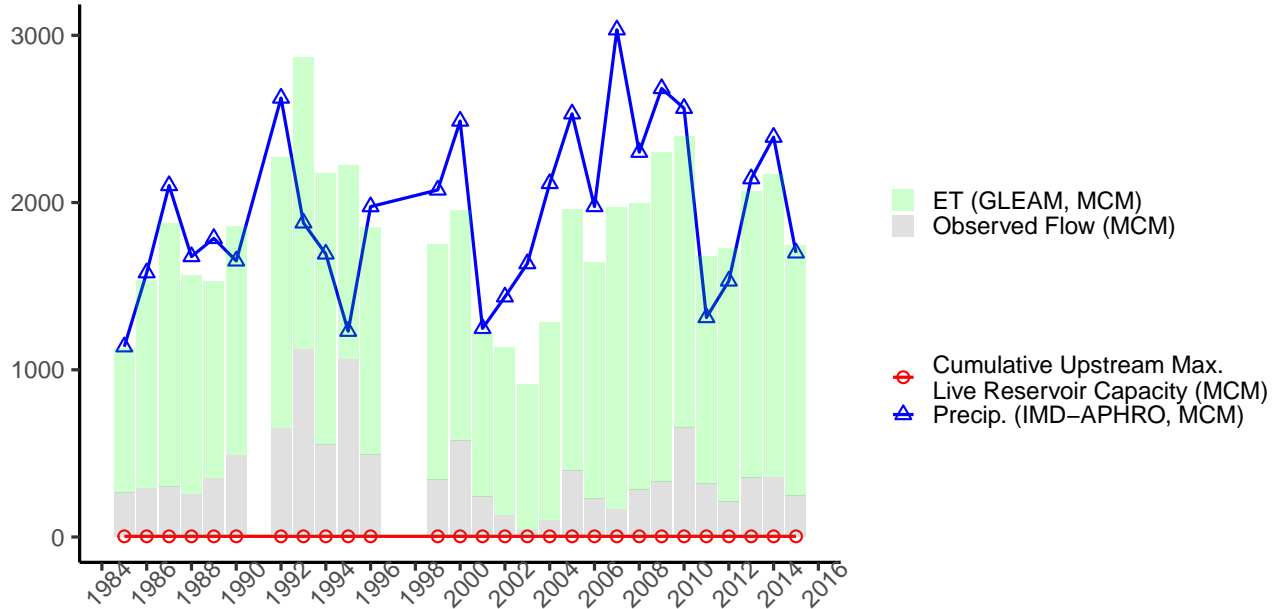

Monsoon (Jun–Sep), Station: Byaladahalli, River: Krishna/Tungabhadra/Tunga  
 GHI ID: kris\_byala, Catch. Area: 2508 sq. km

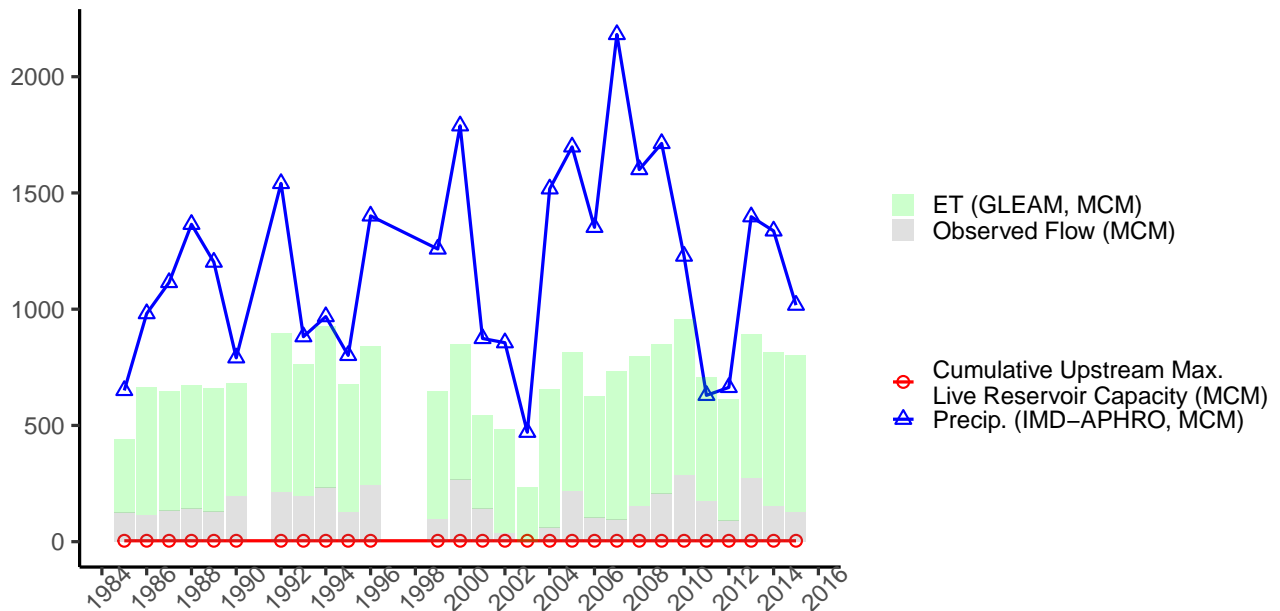

Annual (Jun–May), Station: Daund, River: Krishna/Bhima  
 GHI ID: kris\_daund, Catch. Area: 11439 sq. km

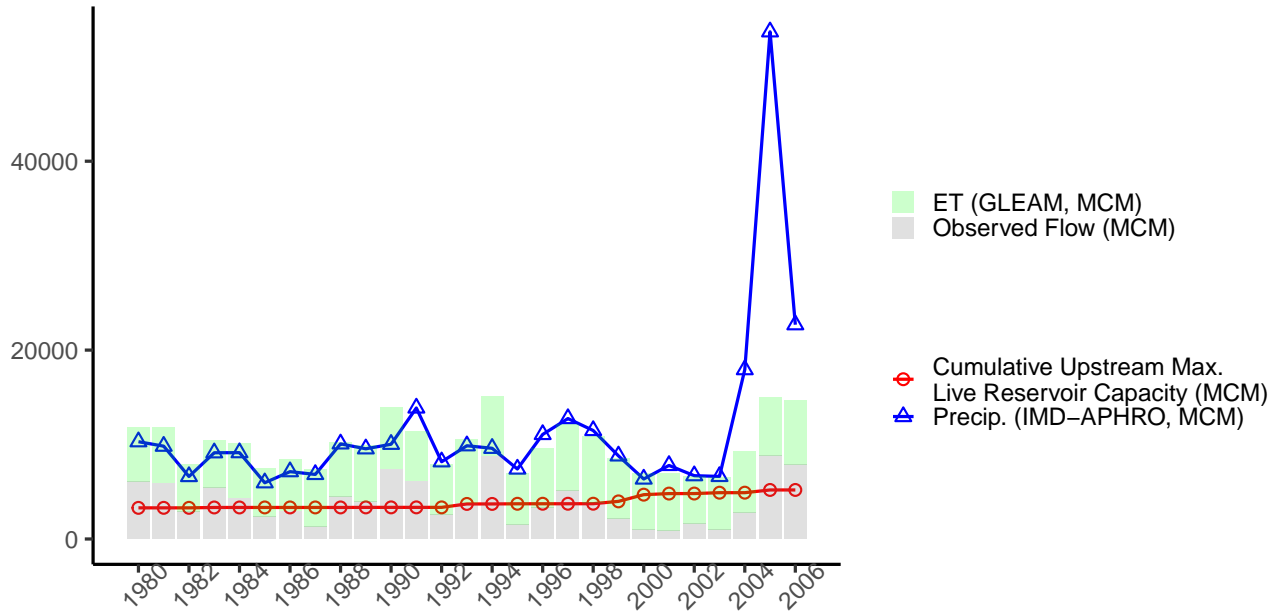

Monsoon (Jun–Sep), Station: Daund, River: Krishna/Bhima  
 GHI ID: kris\_daund, Catch. Area: 11439 sq. km

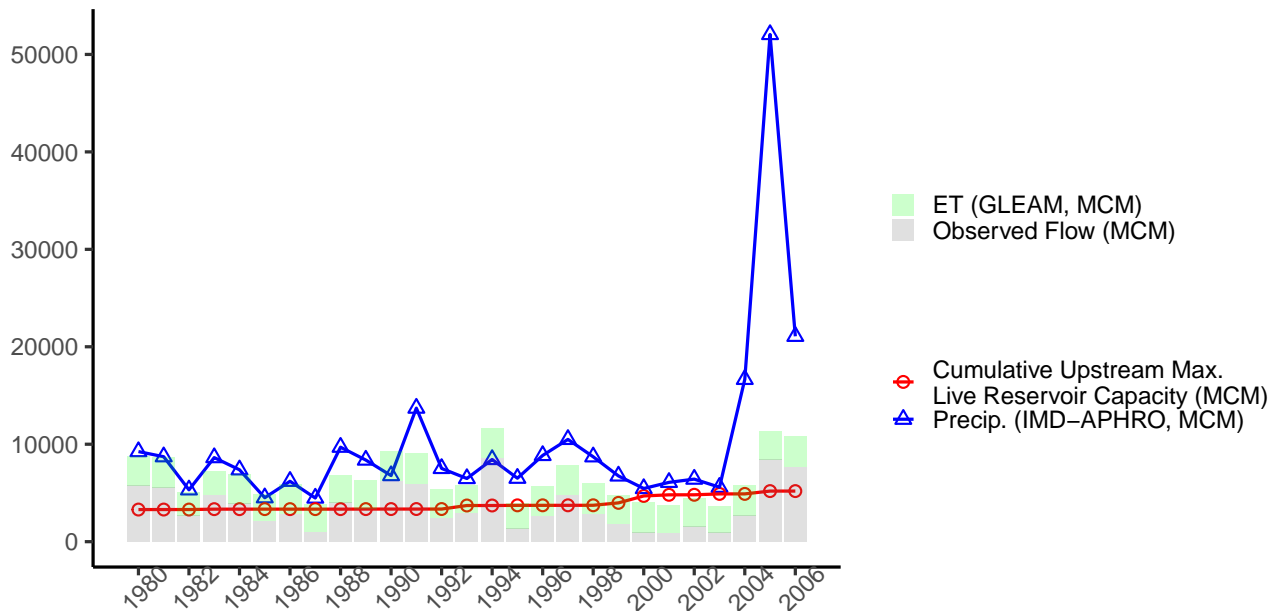

Annual (Jun–May), Station: Huvinhedigi, River: Krishna  
 GHI ID: kris\_huvin, Catch. Area: 54166 sq. km

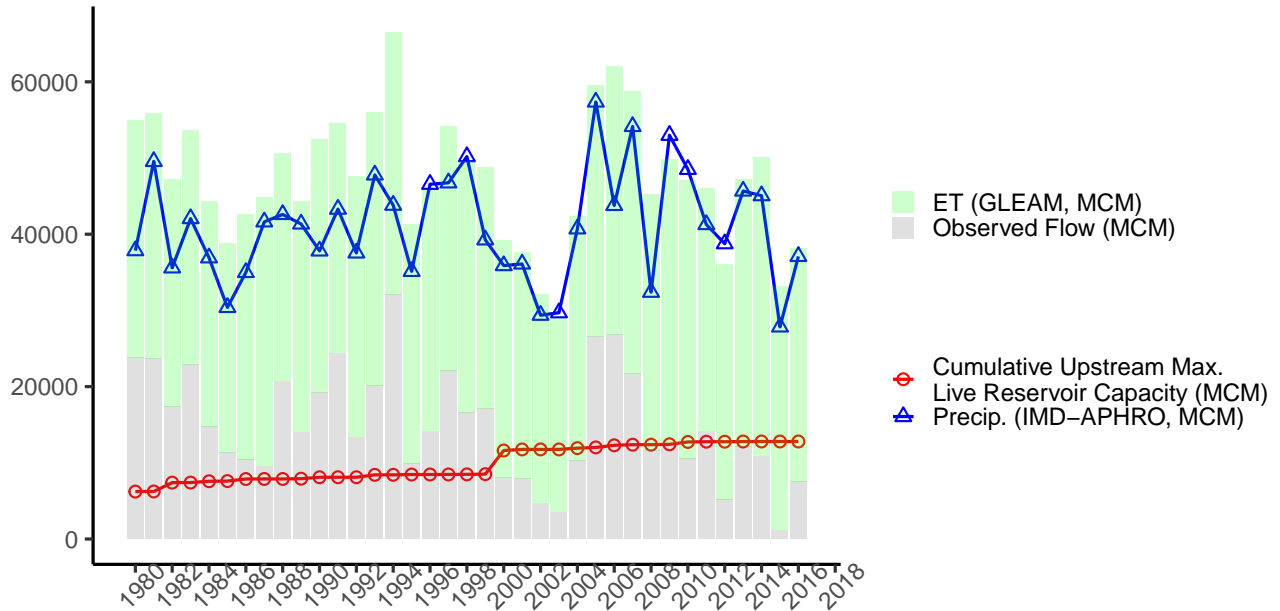

Monsoon (Jun–Sep), Station: Huvinhedigi, River: Krishna  
 GHI ID: kris\_huvin, Catch. Area: 54166 sq. km

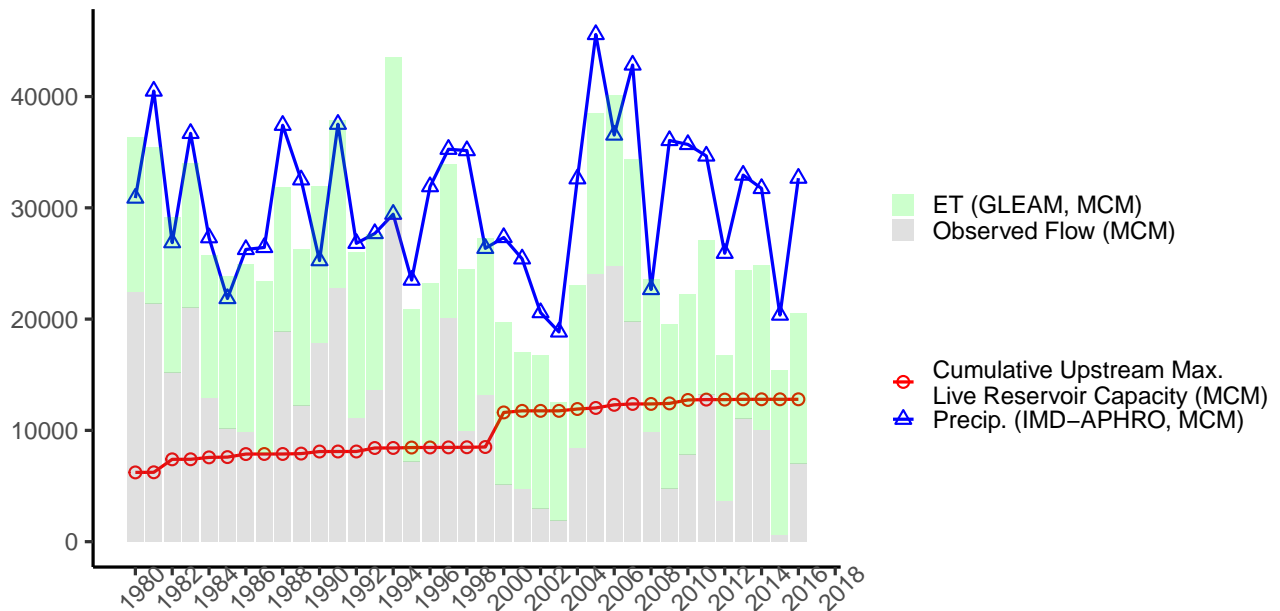

Annual (Jun–May), Station: Narsingpur, River: Krishna/Bhima  
GHI ID: kris\_narsi, Catch. Area: 22326 sq. km

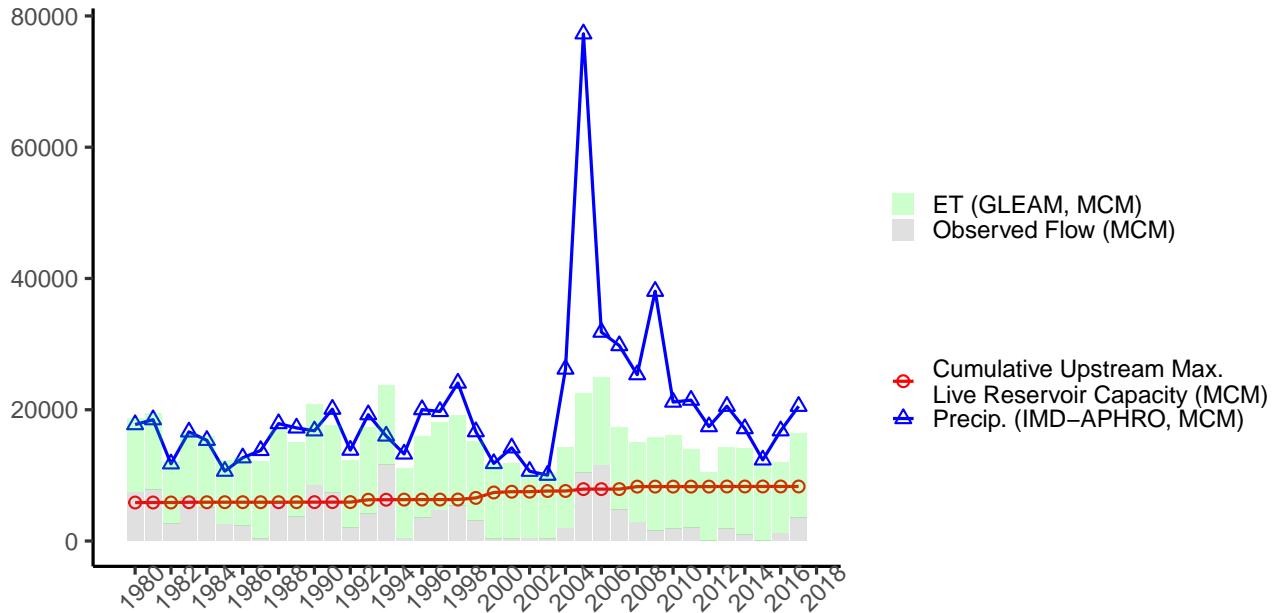

Monsoon (Jun–Sep), Station: Narsingpur, River: Krishna/Bhima  
GHI ID: kris\_narsi, Catch. Area: 22326 sq. km

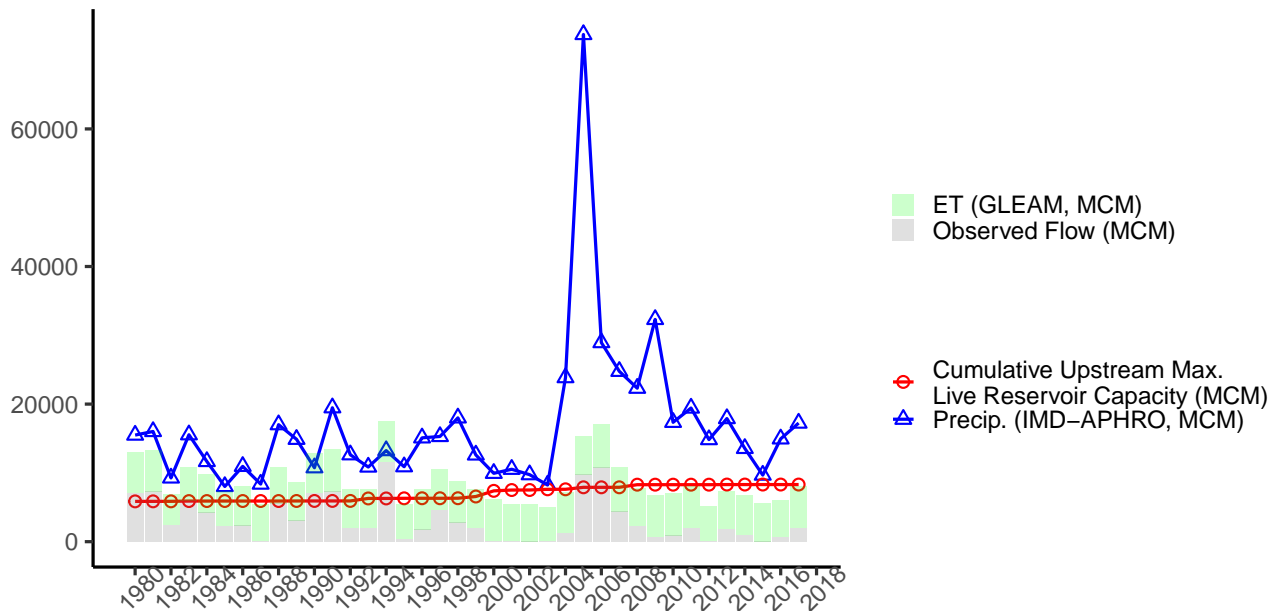



Annual (Jun–May), Station: Sarati, River: Krishna/Bhima/Nira  
GHI ID: kris\_sarat, Catch. Area: 6807 sq. km

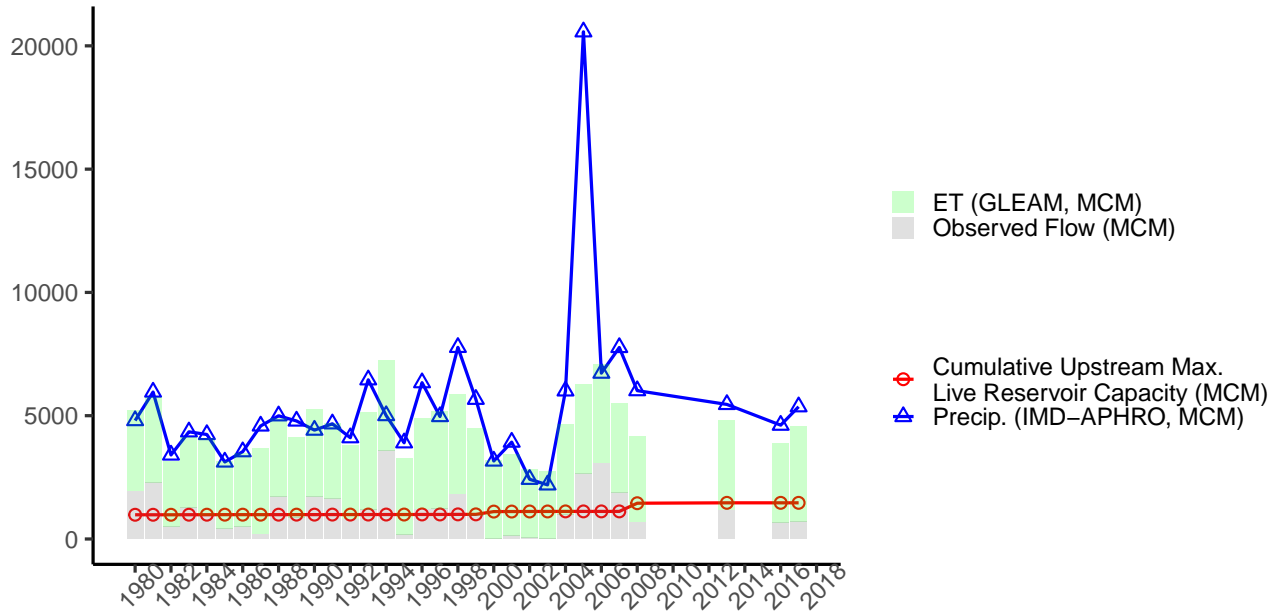

Monsoon (Jun–Sep), Station: Sarati, River: Krishna/Bhima/Nira  
GHI ID: kris\_sarat, Catch. Area: 6807 sq. km

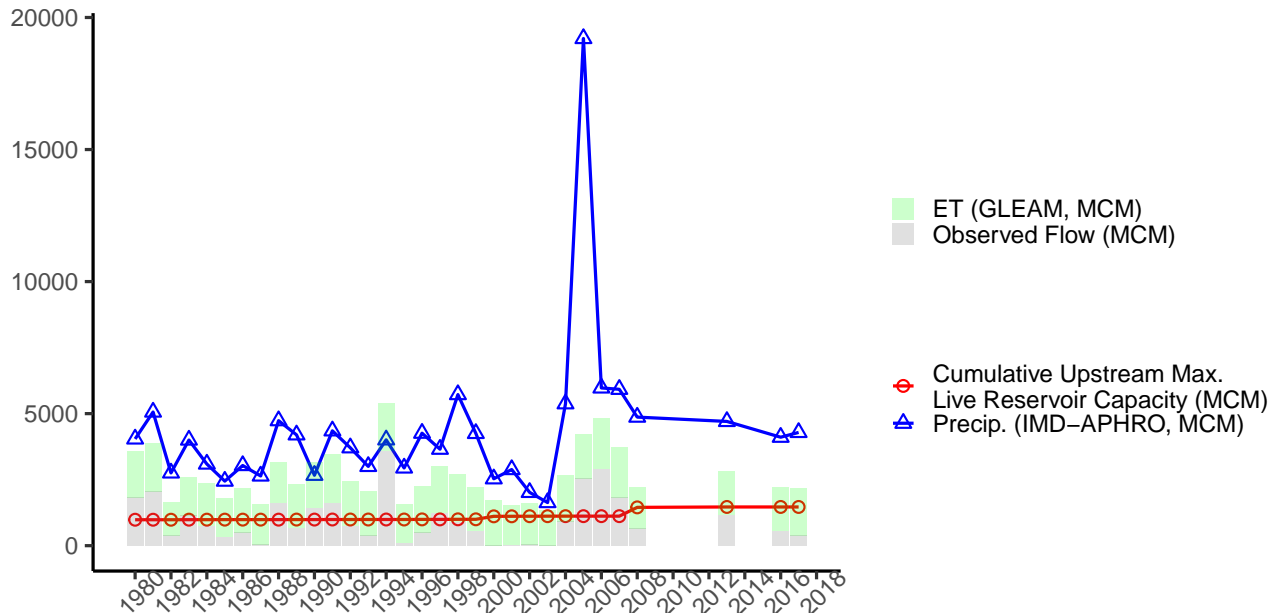

Annual (Jun–May), Station: Rampur, River: Mahanadi/Jonk  
 GHI ID: maha\_rampu, Catch. Area: 3451 sq. km

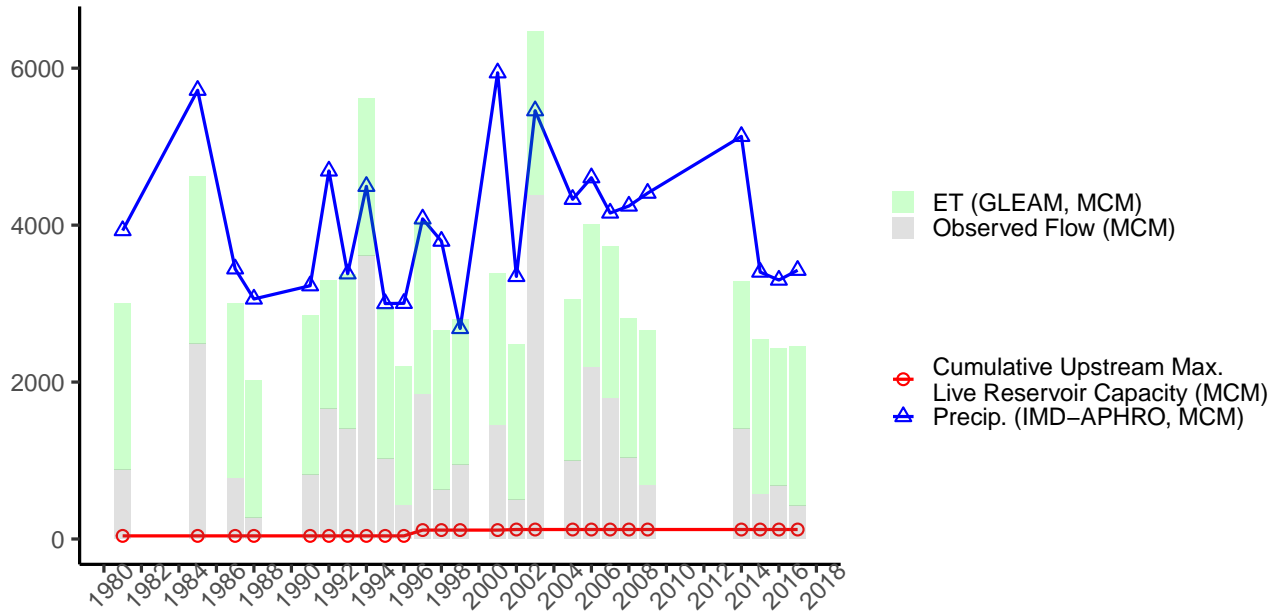

Monsoon (Jun–Sep), Station: Rampur, River: Mahanadi/Jonk  
 GHI ID: maha\_rampu, Catch. Area: 3451 sq. km

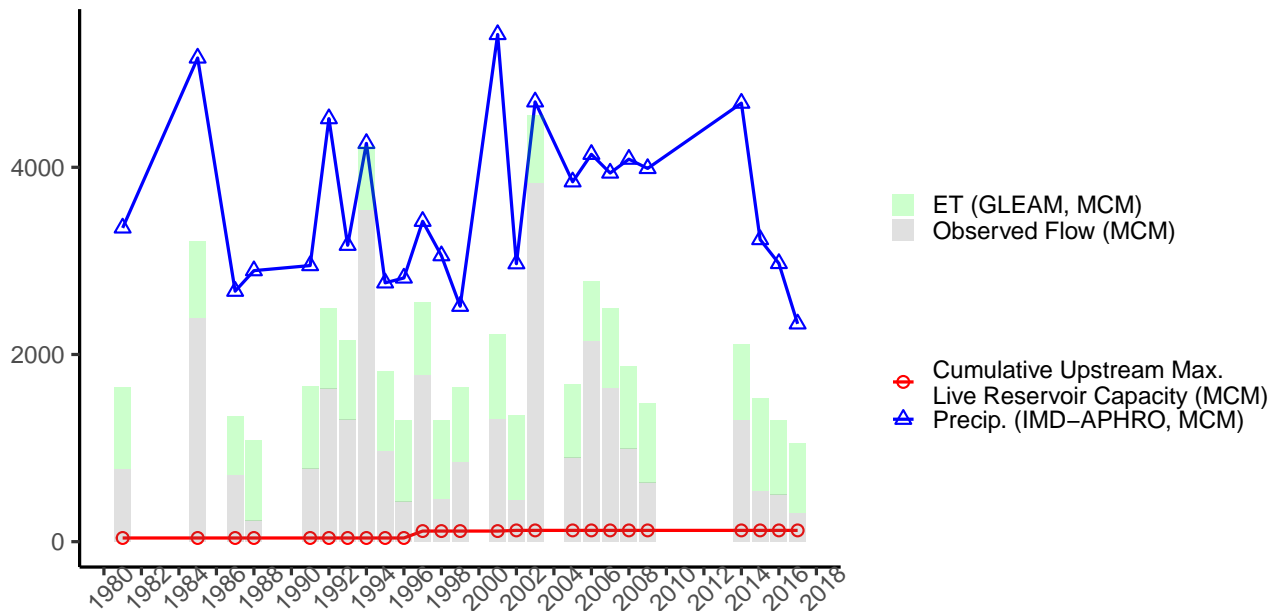

Annual (Jun–May), Station: Belkheri, River: Narmada/Sher  
GHI ID: narm\_belkh, Catch. Area: 1490 sq. km

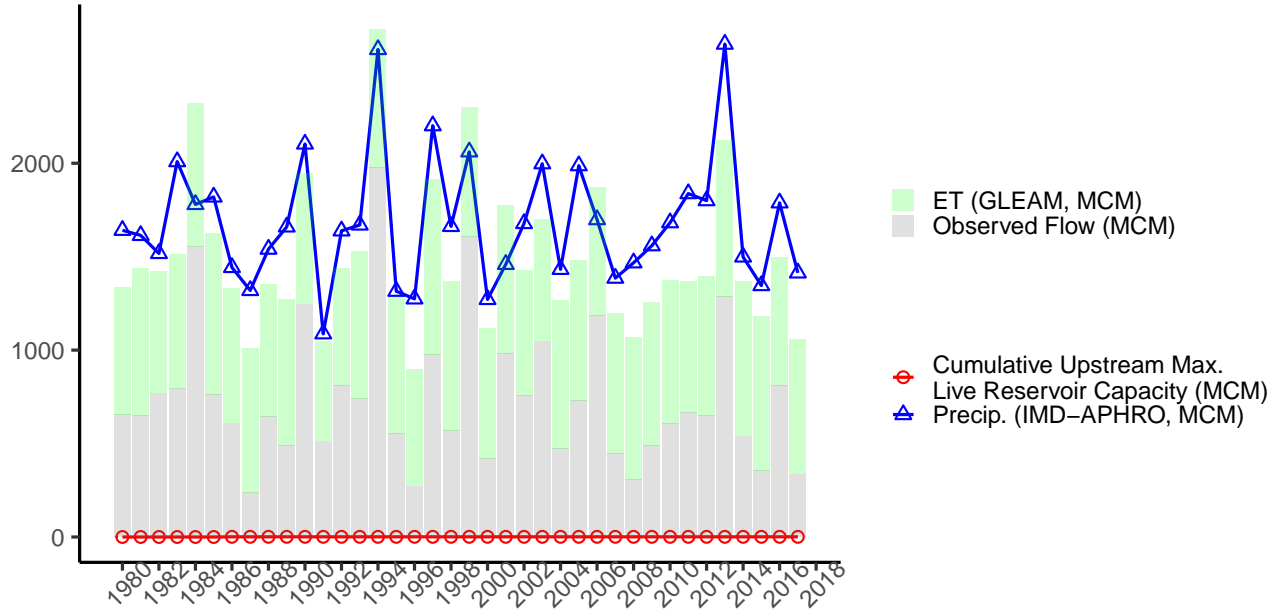

Monsoon (Jun–Sep), Station: Belkheri, River: Narmada/Sher  
GHI ID: narm\_belkh, Catch. Area: 1490 sq. km

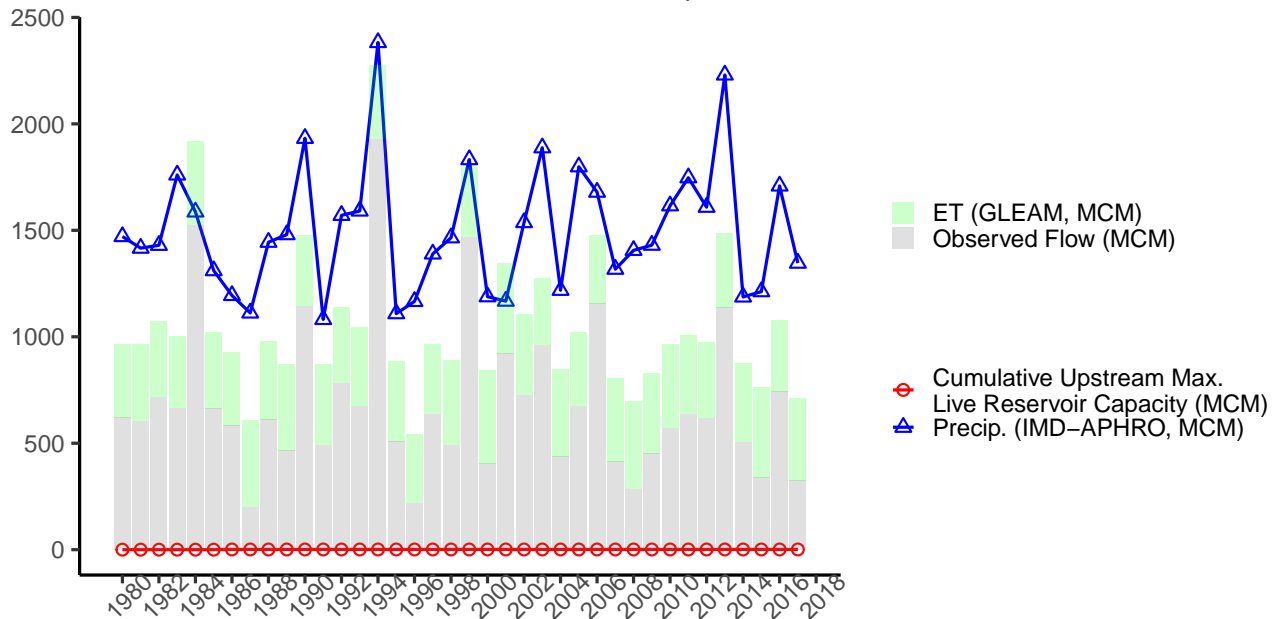

Annual (Jun–May), Station: Chhidgaon, River: Narmada/Ganjal  
 GHI ID: narm\_chhid, Catch. Area: 1765 sq. km

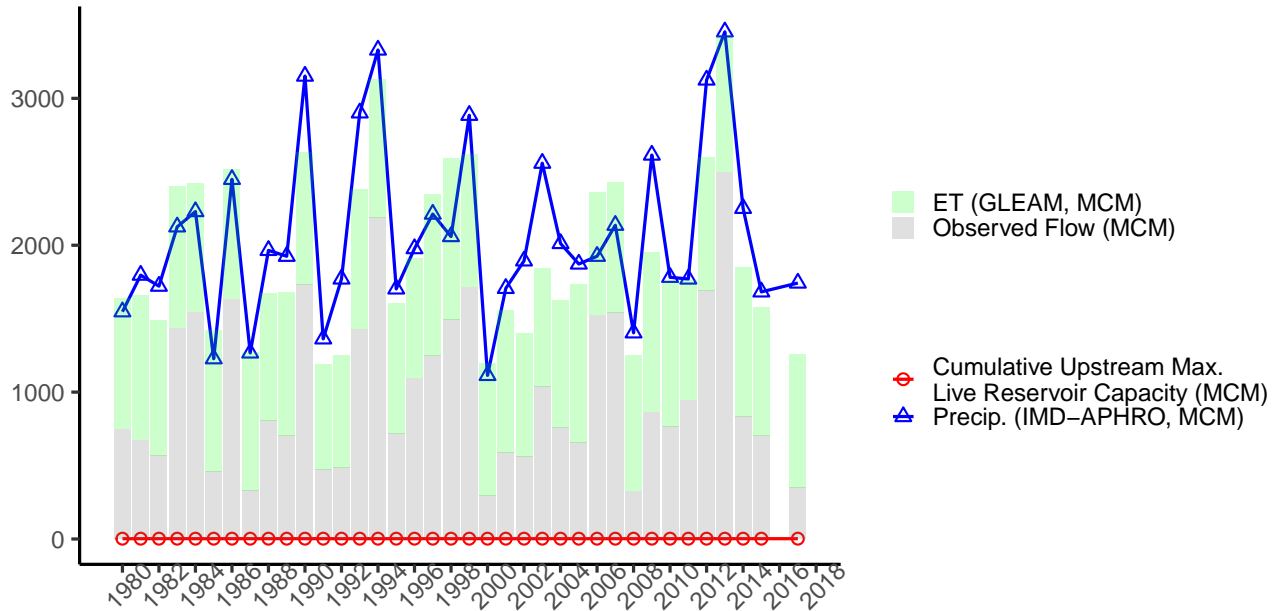

Monsoon (Jun–Sep), Station: Chhidgaon, River: Narmada/Ganjal  
 GHI ID: narm\_chhid, Catch. Area: 1765 sq. km

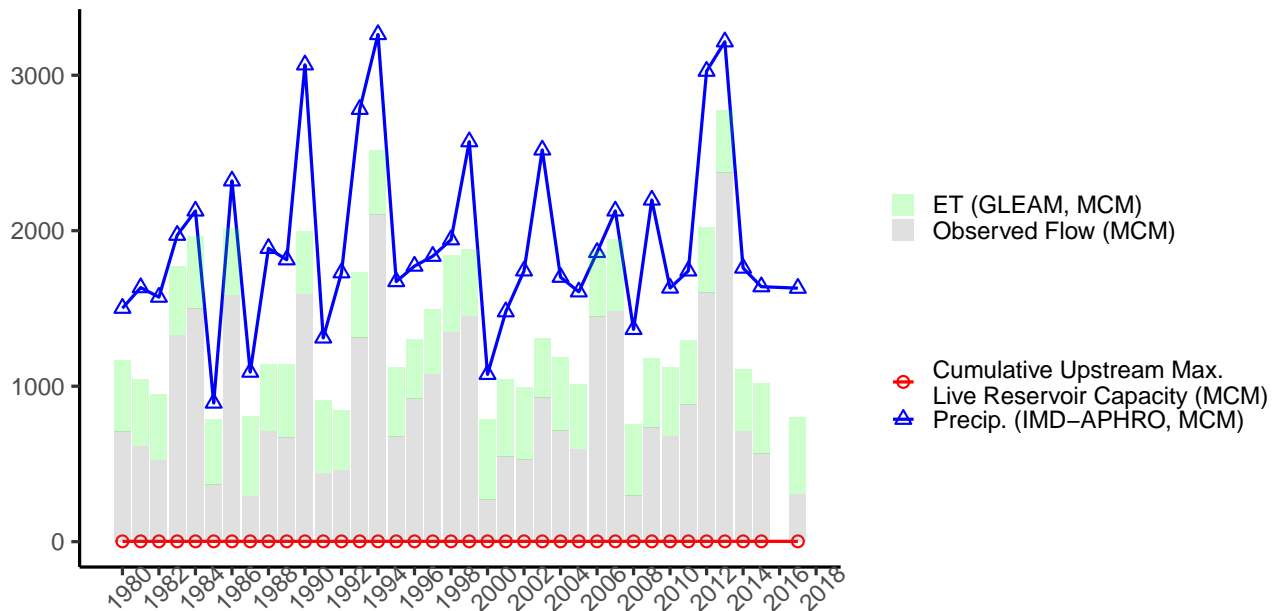

Annual (Jun–May), Station: Kogaon, River: Narmada/Kundi  
 GHI ID: narm\_kogao, Catch. Area: 3934 sq. km

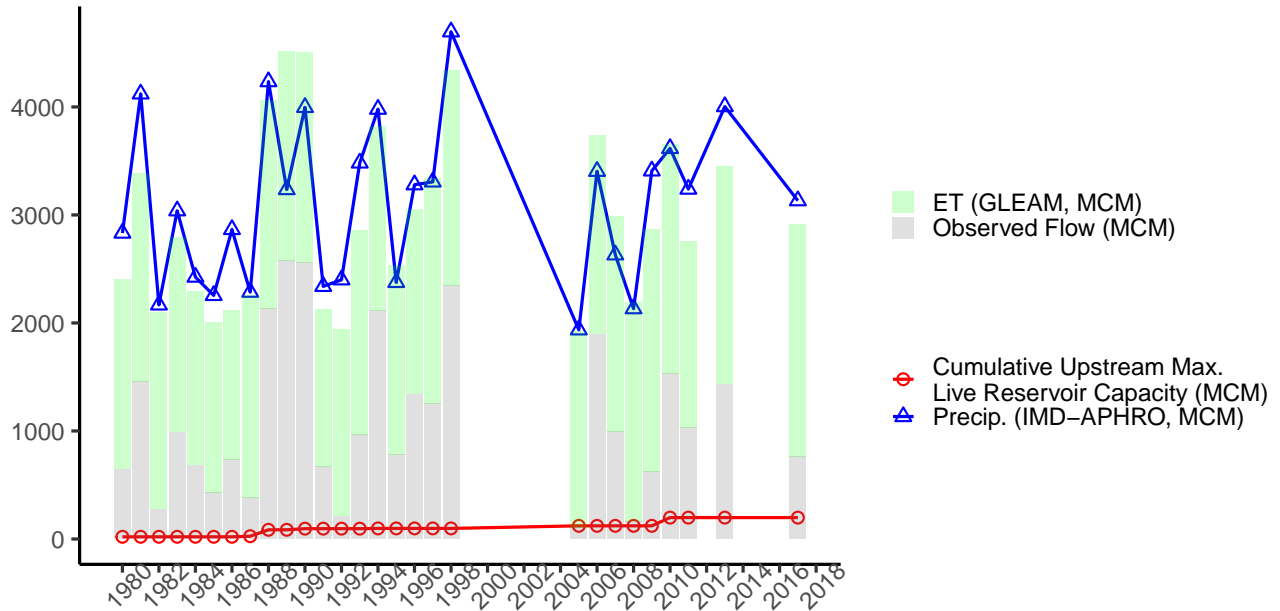

Monsoon (Jun–Sep), Station: Kogaon, River: Narmada/Kundi  
 GHI ID: narm\_kogao, Catch. Area: 3934 sq. km

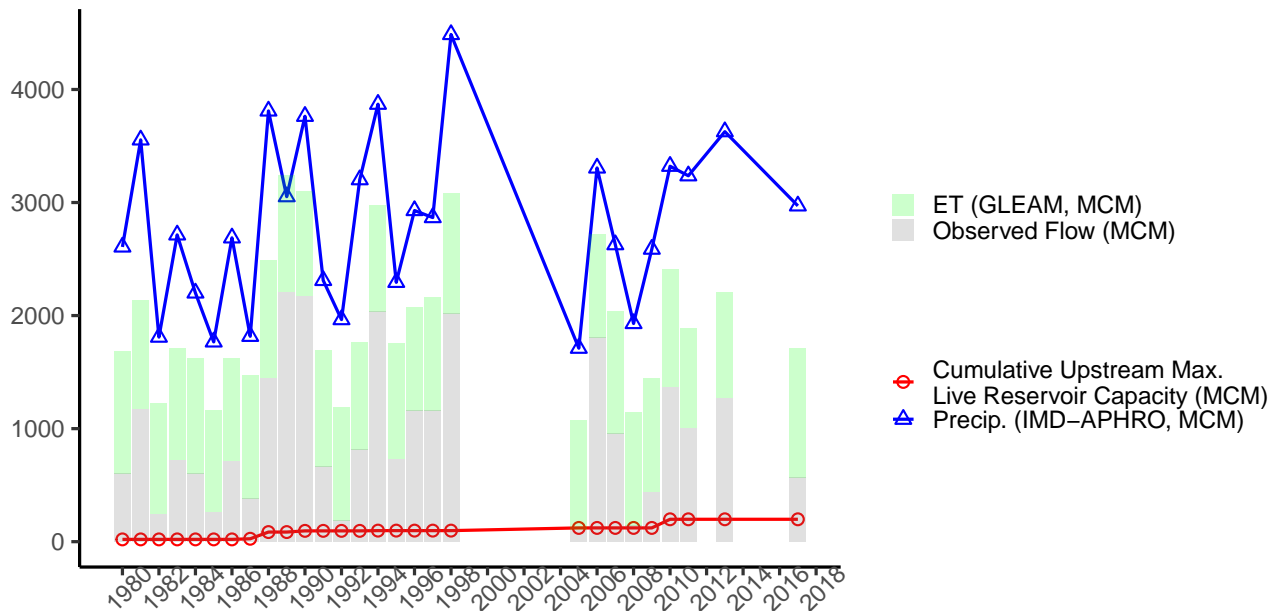

Annual (Jun–May), Station: Mohgaoan, River: Narmada/Burhner  
 GHI ID: narm\_mohga, Catch. Area: 3998 sq. km

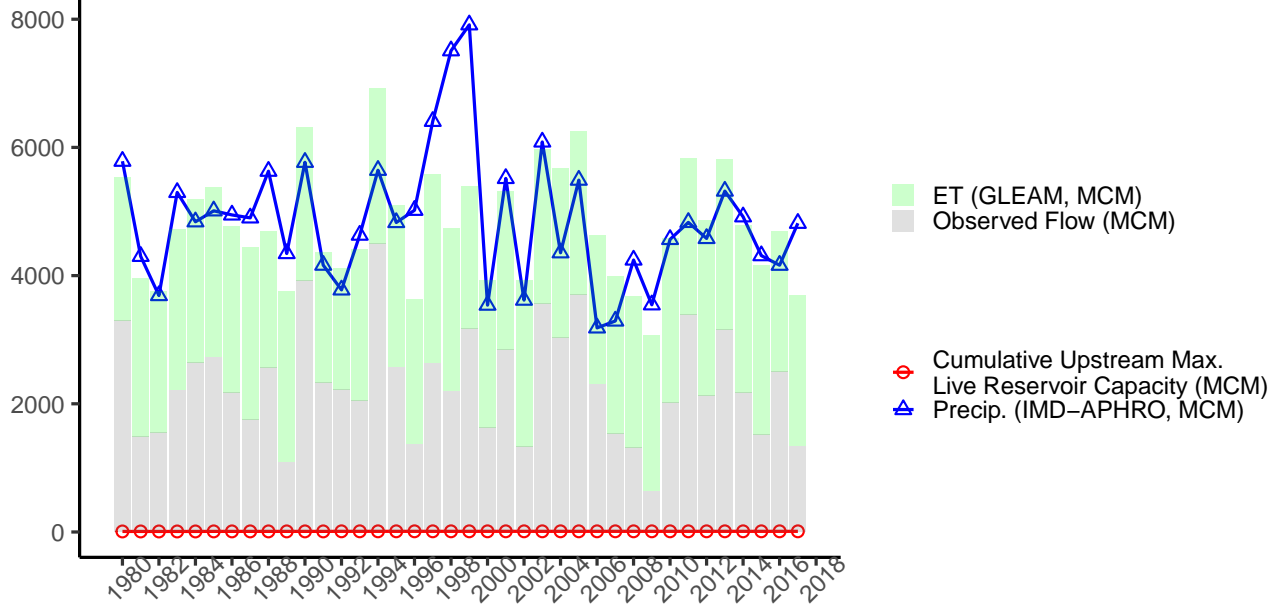

Monsoon (Jun–Sep), Station: Mohgaoan, River: Narmada/Burhner  
 GHI ID: narm\_mohga, Catch. Area: 3998 sq. km

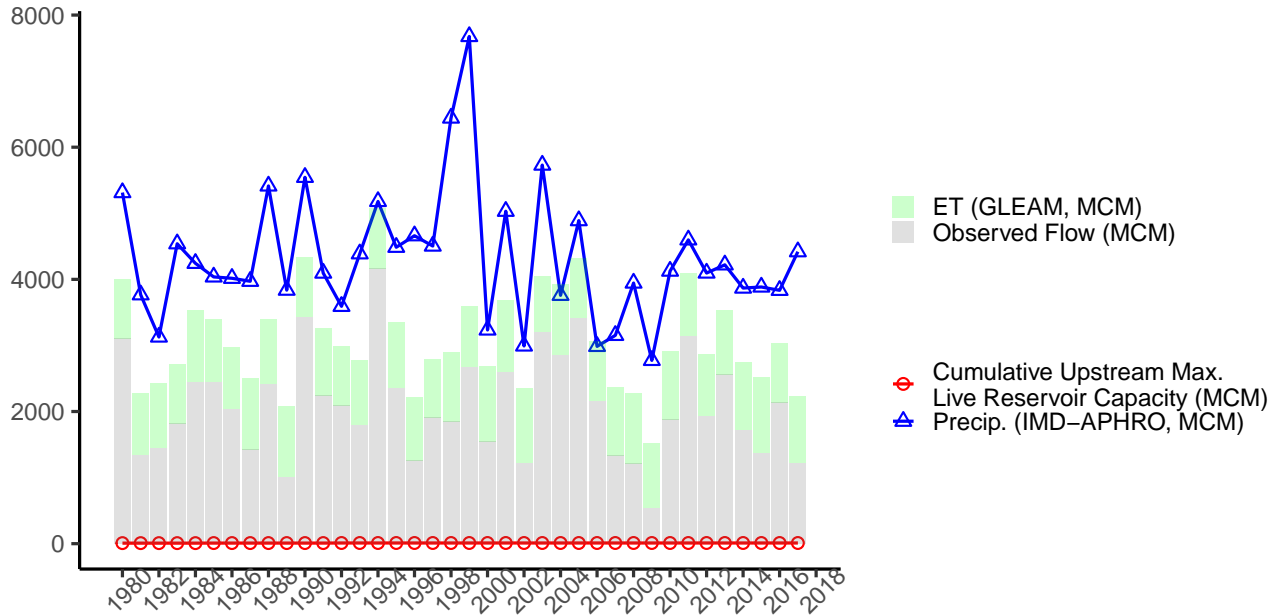

Annual (Jun–May), Station: Jamshedpur, River: Subarnarekha  
GHI ID: sube\_jams1, Catch. Area: 12785 sq. km

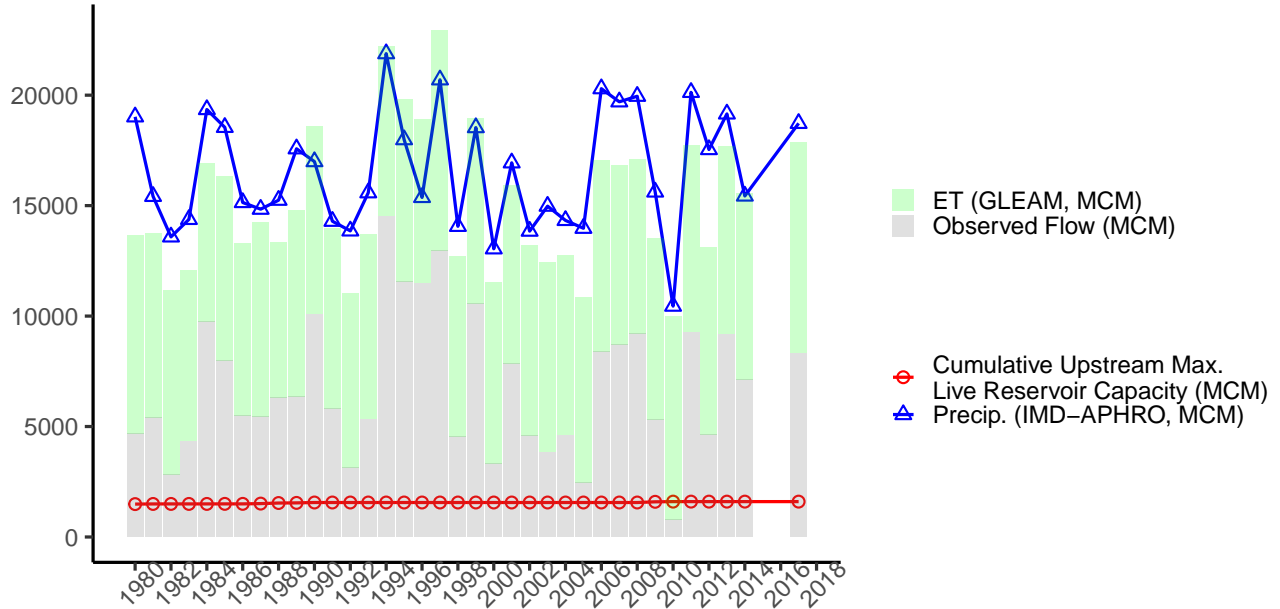

Monsoon (Jun–Sep), Station: Jamshedpur, River: Subarnarekha  
GHI ID: sube\_jams1, Catch. Area: 12785 sq. km

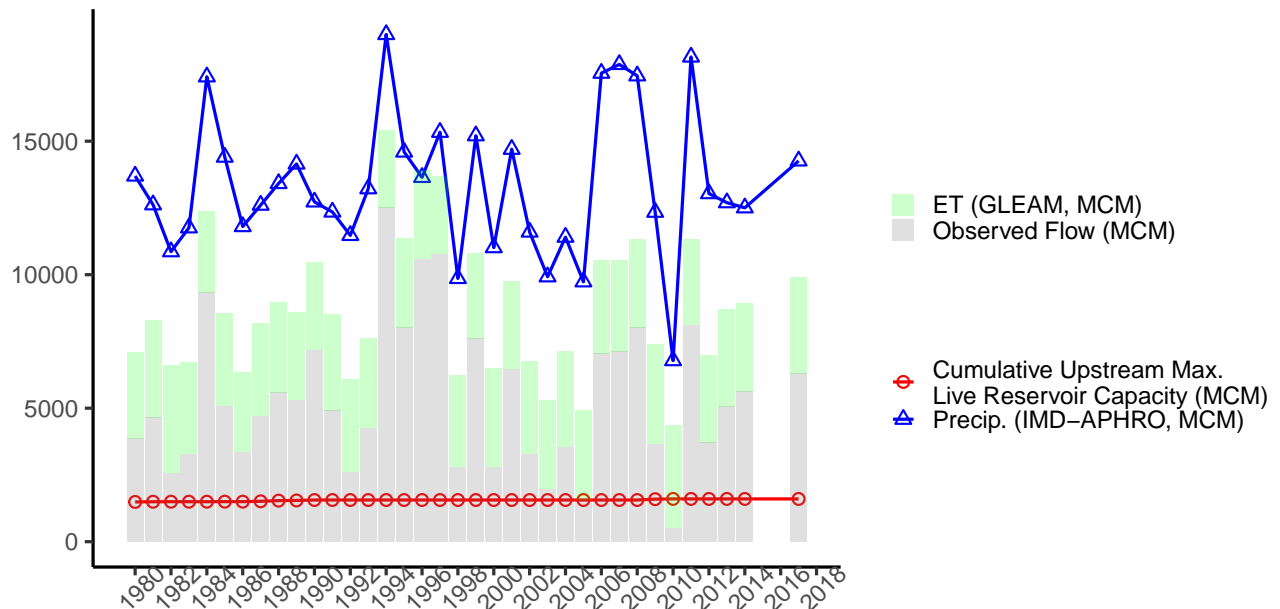

Annual (Jun–May), Station: Burhanpur, River: Tapi  
GHI ID: tapi\_burha, Catch. Area: 9070 sq. km

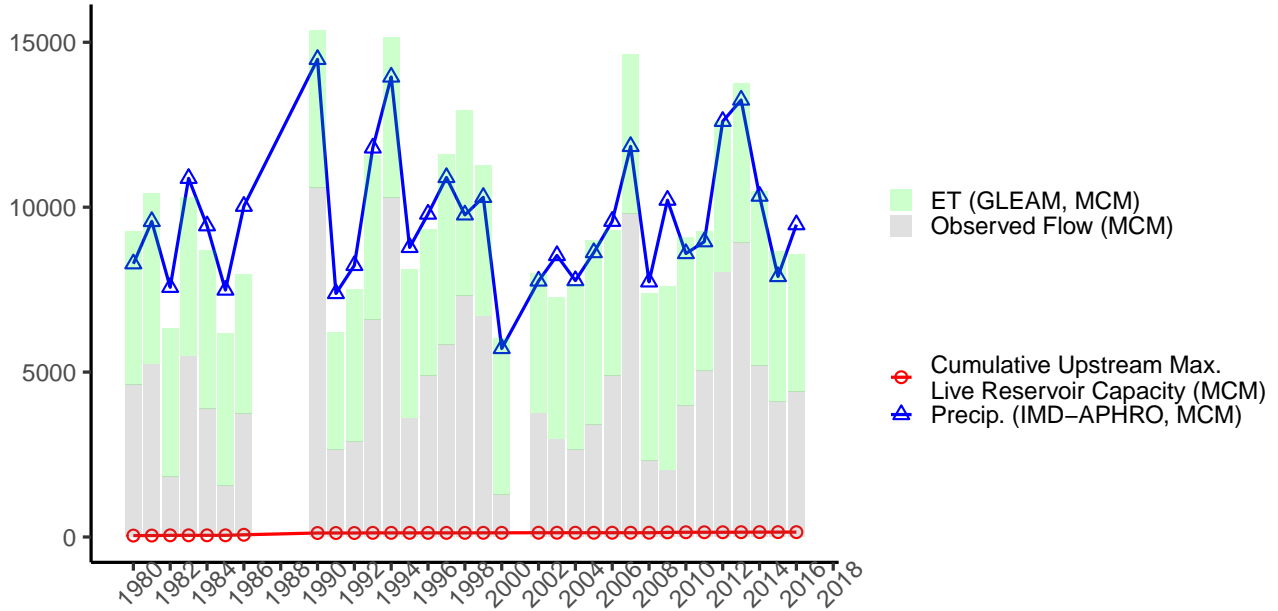

Monsoon (Jun–Sep), Station: Burhanpur, River: Tapi  
GHI ID: tapi\_burha, Catch. Area: 9070 sq. km

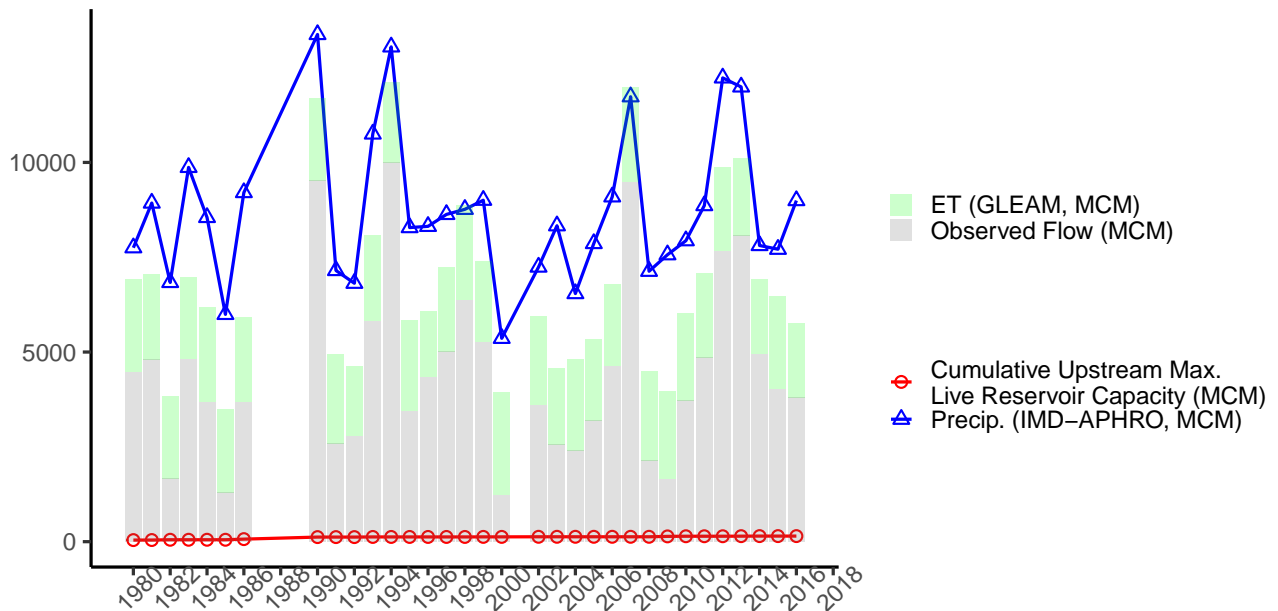



Annual (Jun–May), Station: Nanipalson, River: Damanganga  
 GHI ID: wfrn\_nanip, Catch. Area: 763 sq. km

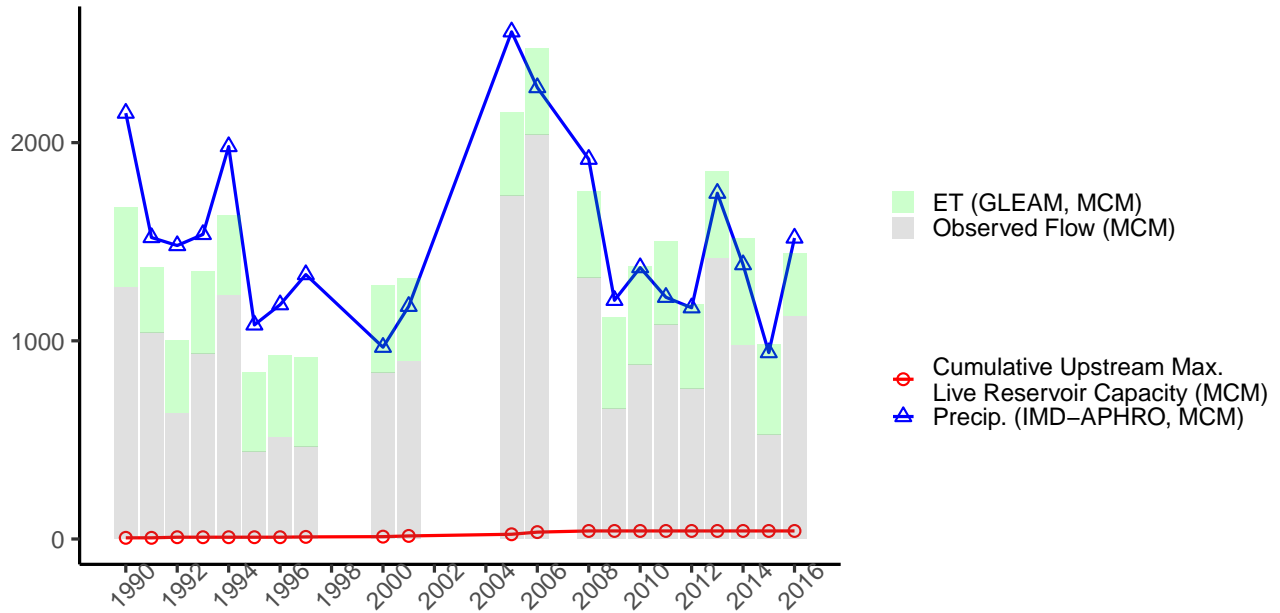

Monsoon (Jun–Sep), Station: Nanipalson, River: Damanganga  
 GHI ID: wfrn\_nanip, Catch. Area: 763 sq. km

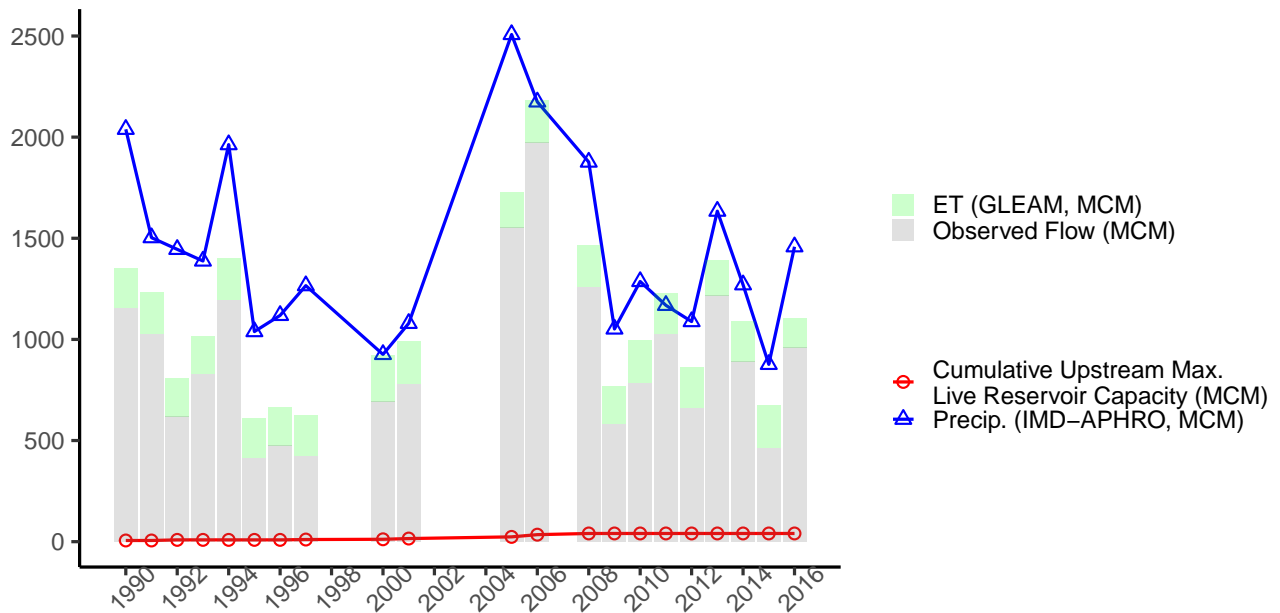

Annual (Jun–May), Station: Addoor, River: Gurupur  
 GHI ID: wfrs\_addoo, Catch. Area: 719 sq. km

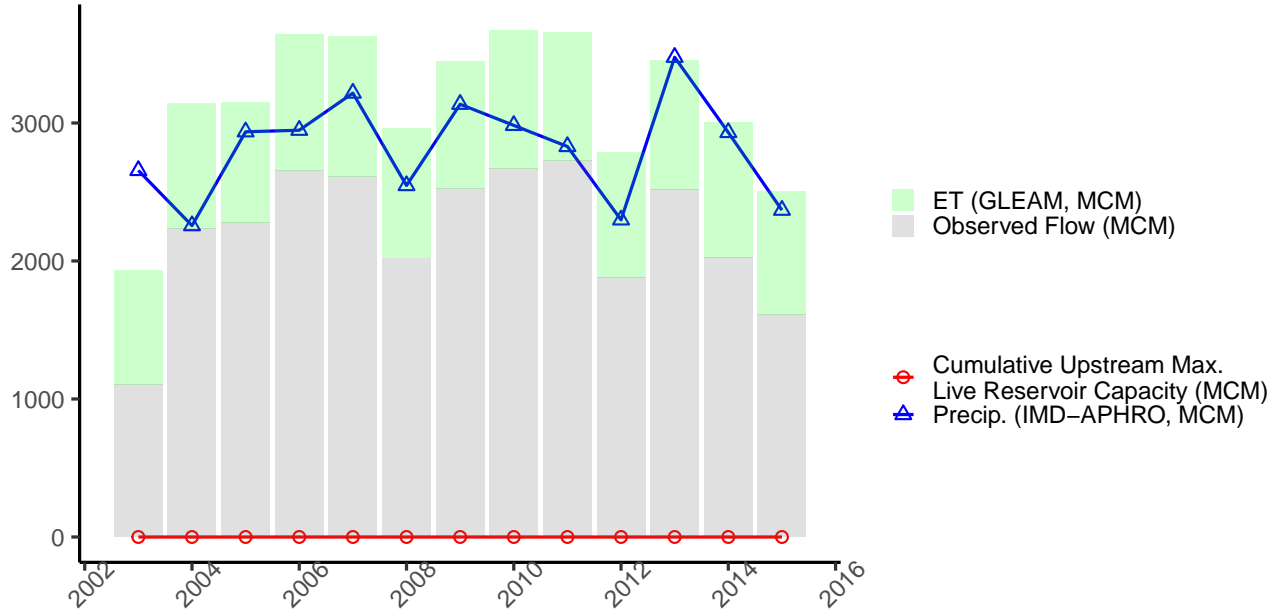

Monsoon (Jun–Sep), Station: Addoor, River: Gurupur  
 GHI ID: wfrs\_addoo, Catch. Area: 719 sq. km

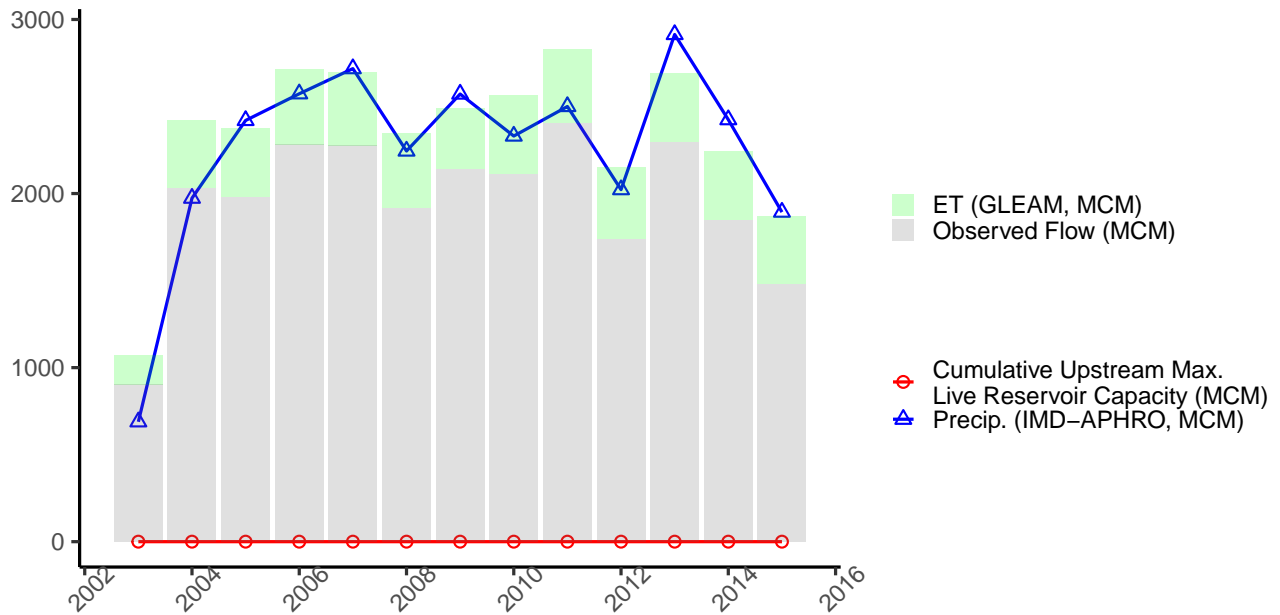

Annual (Jun–May), Station: Erinjipuzha, River: Payaswani  
 GHI ID: wfrrs\_erinj, Catch. Area: 912 sq. km

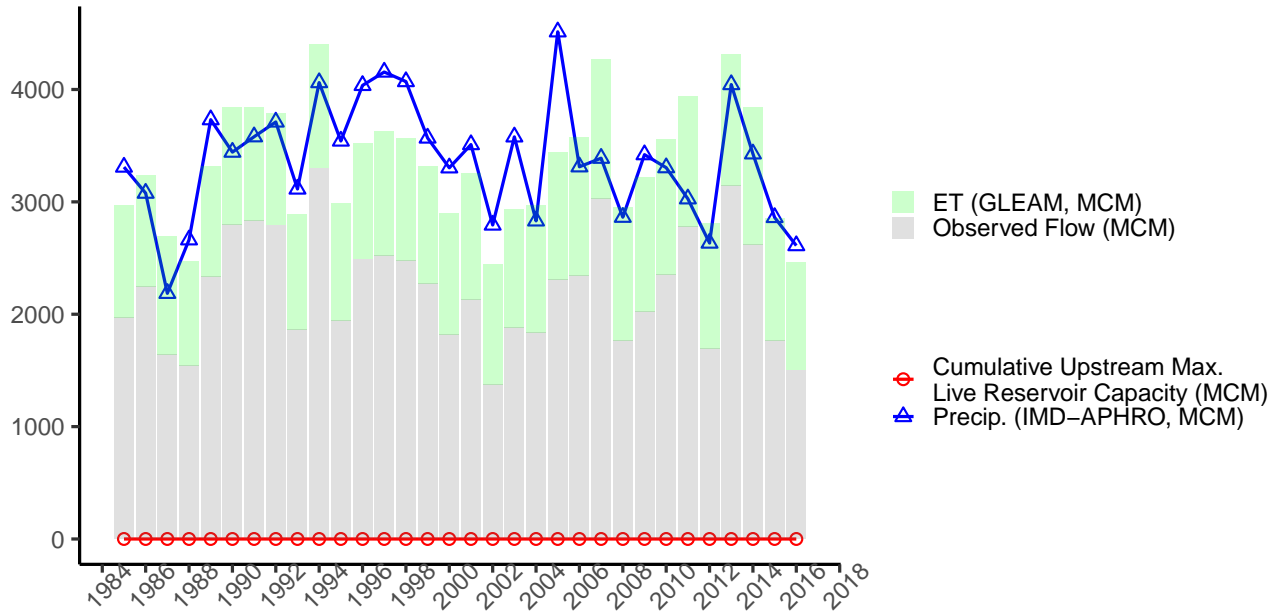

Monsoon (Jun–Sep), Station: Erinjipuzha, River: Payaswani  
 GHI ID: wfrrs\_erinj, Catch. Area: 912 sq. km

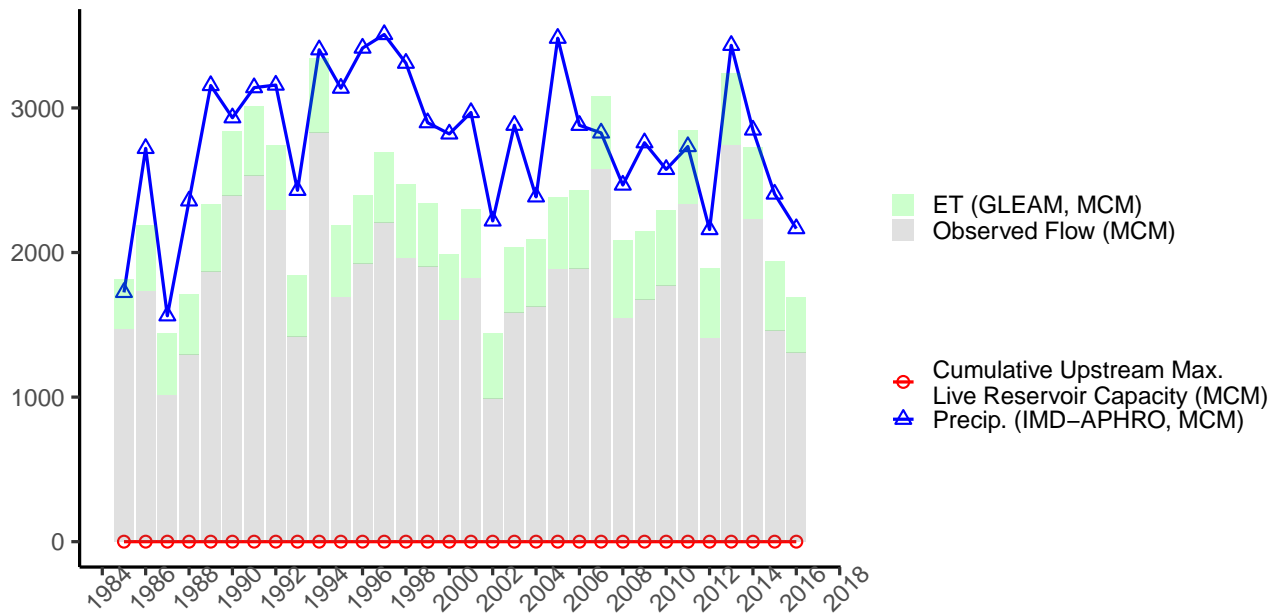

Annual (Jun–May), Station: Kumbidi, River: Bharathapuzha  
 GHI ID: wfrs\_kumbi, Catch. Area: 5867 sq. km

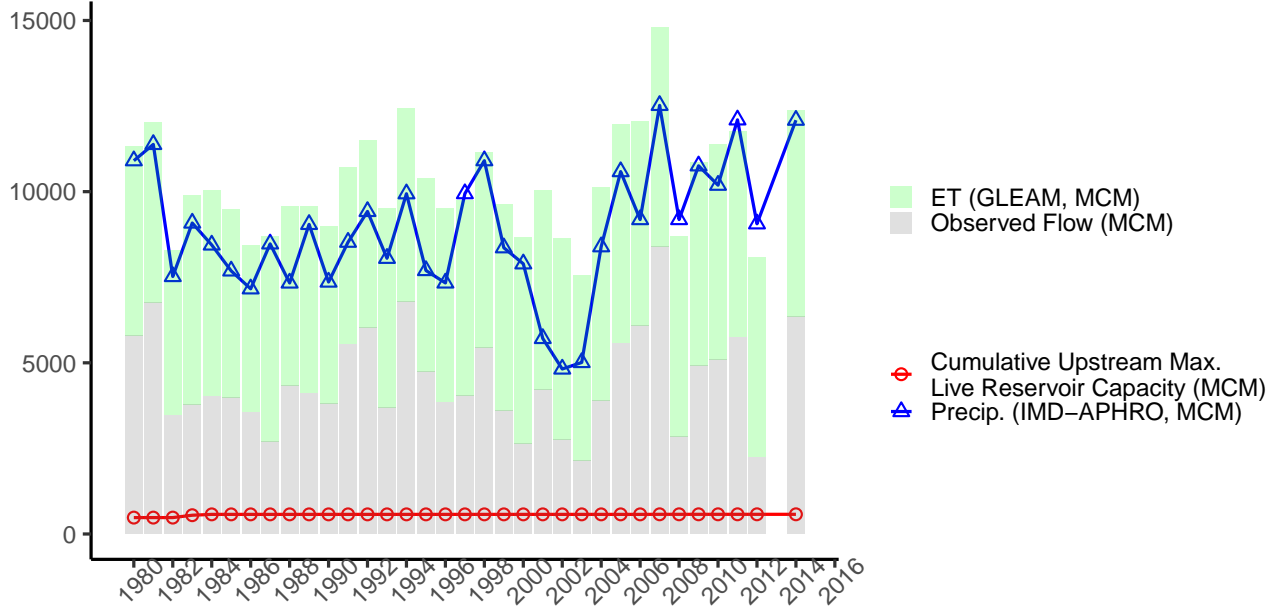

Monsoon (Jun–Sep), Station: Kumbidi, River: Bharathapuzha  
 GHI ID: wfrs\_kumbi, Catch. Area: 5867 sq. km

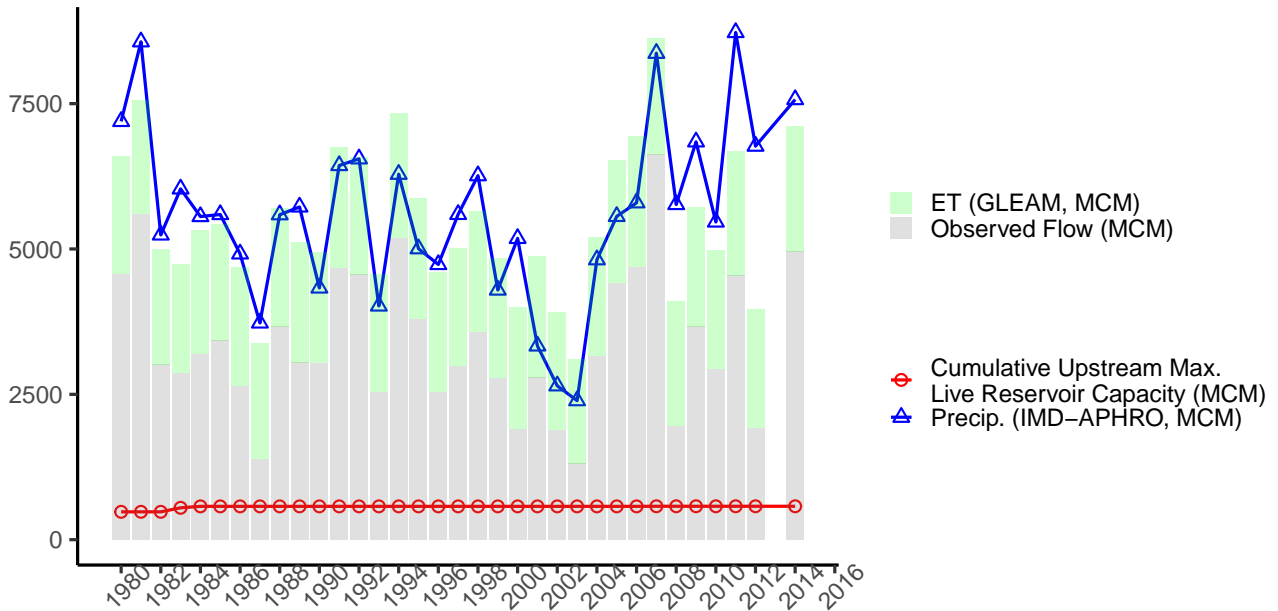

Annual (Jun–May), Station: Badar Pur Ghat, River: Barak  
GHI ID: gbm\_x\_badar, Catch. Area: 25629 sq. km

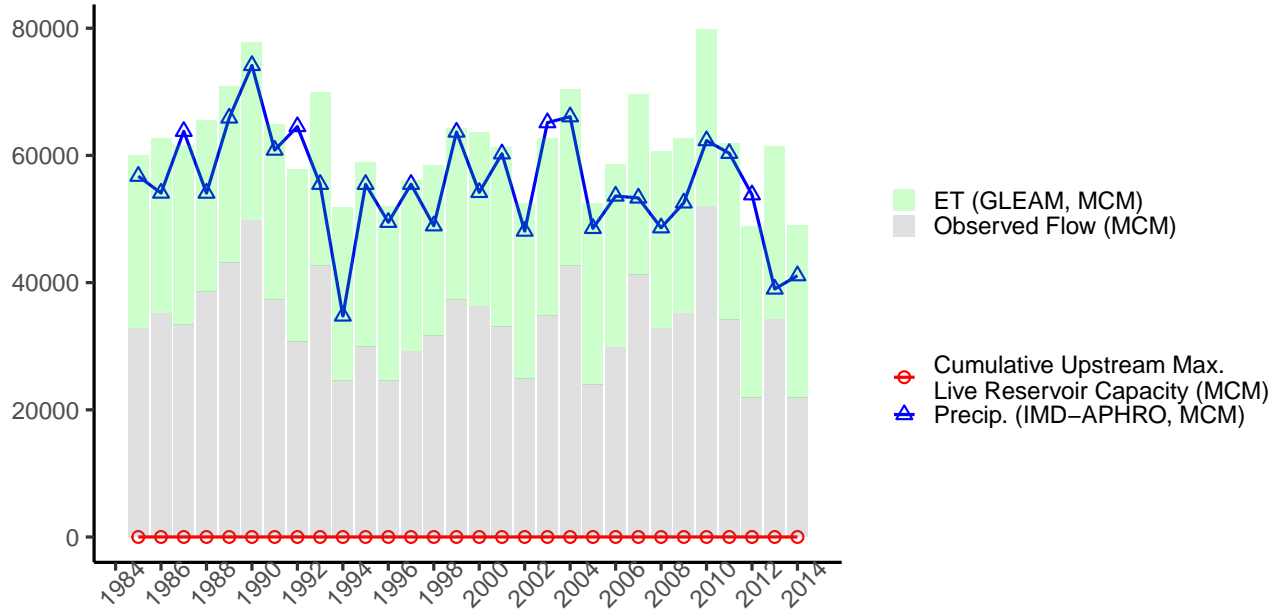

Annual (Jun–May), Station: Fulertal, River: Barak  
GHI ID: gbm\_x\_fuler, Catch. Area: 15249 sq. km

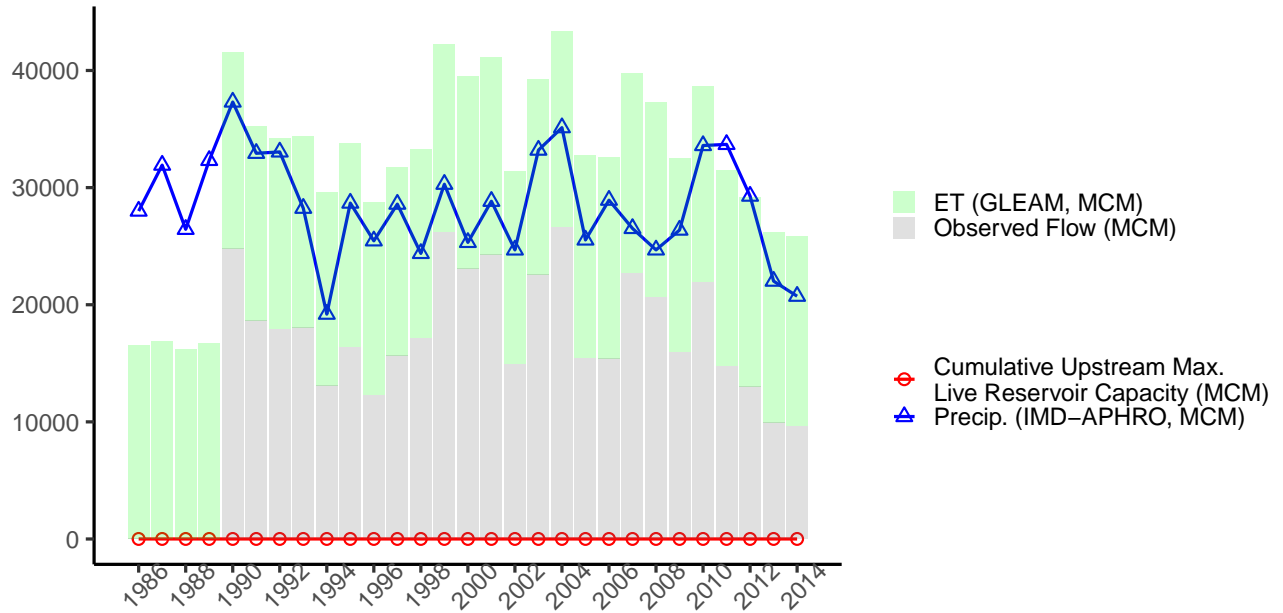

Annual (Jun–May), Station: Kailashahar, River: Manu  
GHI ID: gbm\_x\_kaila, Catch. Area: 2188 sq. km

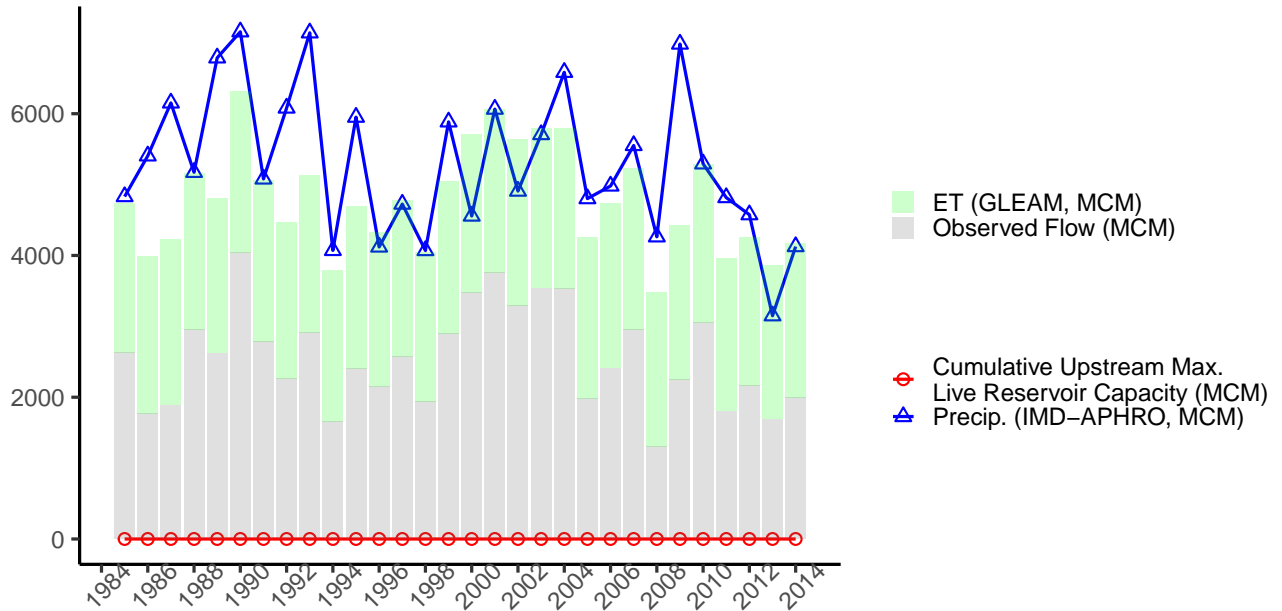

## References

- Beck, H. E., Wood, E. F., McVicar, T. R., Zambrano-Bigiarini, M., Alvarez-Garreton, C., Baez-Villanueva, O. M., Sheffield, J., and Karger, D. N.: Bias correction of global high-resolution precipitation climatologies using streamflow observations from 9372 catchments, *Journal of Climate*, 33, 1299–1315, URL <https://doi.org/10.1175/JCLI-D-19-0332.1>, 2020.
- Brakenridge, G. R.: Global Active Archive of Large Flood Events, Tech. rep., Dartmouth Flood Observatory, University of Colorado, USA, URL <https://floodobservatory.colorado.edu>, 2023.
- CWC-19: Reassessment of Water Availability in India using Space Inputs, Central Water Commission, Basin Planning and Management Organisation, <http://www.cwc.gov.in/water-resource-estimation>, 2019.
- Goroshi, S., Pradhan, R., Singh, R. P., Singh, K., and Parihar, J. S.: Trend analysis of evapotranspiration over India: Observed from long-term satellite measurements, *Journal of Earth System Science*, 126, 1–21, URL <https://doi.org/10.1007/s12040-017-0891-2>, 2017.
- Goteti, G.: Estimation of water resources availability (WRA) using gridded evapotranspiration data: A simpler alternative to Central Water Commission’s WRA assessment, *Journal of Earth System Science*, 131, 1–24, URL <https://www.ias.ac.in/article/fulltext/jess/131/0225>, 2022.
- Humphrey, V., Rodell, M., and Eicker, A.: Using satellite-based terrestrial water storage data: A review, *Surveys in Geophysics*, pp. 1–29, URL <https://doi.org/10.1007/s10712-022-09754-9>, 2023.
- NRLD: National Register of Large Dams, Central Water Commission, Central Dam Safety Organization, <http://www.cwc.gov.in/publication/nrld>, <https://damsafety.in/dharma/Home1/index.php>, 2019.
- Rodell, M., Velicogna, I., and Famiglietti, J. S.: Satellite-based estimates of groundwater depletion in India, *Nature*, 460, 999–1002, URL <https://doi.org/10.1038/nature08238>, 2009.
- Runfola, D., Anderson, A., Baier, H., Crittenden, M., Dowker, E., Fuhrig, S., Goodman, S., Grimsley, G., Layko, R., Melville, G., et al.: geoBoundaries: A global database of political administrative boundaries, *PLoS One*, 15, e0231866, URL <https://doi.org/10.1371/journal.pone.0231866>, 2020.
- Save, H.: GCSR GRACE and GRACE-FO RL06 Mascon Solutions v02, Tech. rep., Center for Space Research, University of Texas, Austin, TX, URL <https://doi.org/10.15781/cgq9-nh24>, 2020.



- Save, H., Bettadpur, S., and Tapley, B. D.: High-resolution CSR GRACE RL05 mascons, *Journal of Geophysical Research: Solid Earth*, 121, 7547–7569, URL <https://doi.org/10.1002/2016JB013007>, 2016.
- Tapley, B. D., Bettadpur, S., Ries, J. C., Thompson, P. F., and Watkins, M. M.: GRACE measurements of mass variability in the Earth system, *science*, 305, 503–505, URL <https://doi.org/10.1126/science.1099192>, 2004.
- Zhang, K., Kimball, J. S., Nemani, R. R., and Running, S. W.: A continuous satellite-derived global record of land surface evapotranspiration from 1983 to 2006, *Water Resources Research*, 46, URL <https://doi.org/10.1029/2009WR008800>, 2010.
